# Supplementary material for: Oxyallyl cation promoted dearomative semipinacol rearrangement: a facile stereodivergent synthesis of spiro-indolines with contiguous quaternary centers
Source: Royal Society of Chemistry journal article supplement (doi:10.1039/d1cc02033a), 2021-01-01

**Oxyallyl Cation Promoted Dearomative Semipinacol Rearrangement:  
Facile Stereodivergent Synthesis of Spiro-indolines with Contiguous  
Quaternary Centers**

Yu-Yang Xie, Yun-Peng Wang, Xiao-Jing Zhao, Ai-Fang Wang, Zhi-Min Chen,\* and Yong-Qiang Tu\*

**Table of Contents**

|                                                                     |            |
|---------------------------------------------------------------------|------------|
| <b>1. General Information .....</b>                                 | <b>S2</b>  |
| <b>2. Screening Conditions.....</b>                                 | <b>S3</b>  |
| <b>3. Preparation of Substrates 1a-1k and Analytic Data .....</b>   | <b>S5</b>  |
| <b>4. General procedure for the Semipinacol Rearrangement .....</b> | <b>S16</b> |
| <b>5. X-Ray Analysis of Compound 3a, 3h and 3h' .....</b>           | <b>S32</b> |
| <b>6. References.....</b>                                           | <b>S35</b> |
| <b>7. Copies of NMR Spectra.....</b>                                | <b>S36</b> |

## 1. General Information

All reactions were performed using oven-dried or flame-dried glassware equipped with a magnetic stir bar under an atmosphere of argon unless otherwise noted. All reagents were purchased from commercial suppliers and used without further purification. In addition to commercially available extra dry solvents, all solvents were purified by standard operating method. Toluene, tetrahydrofuran, diethyl ether and benzene were distilled from sodium; Dichloromethane and trichloromethane were distilled from calcium hydride. Thin-layer chromatography was performed with EMD silica gel 60 F254 plates eluting with solvents indicated, visualized by a 254 nm UV lamp and stained with phosphomolybdic acid.  $^1\text{H}$  and  $^{13}\text{C}$  NMR spectra were recorded on Bruker AM-400 MHz, Varian Mercury-400 or Bruker AM-500 MHz instruments. Chemical shifts were denoted in ppm ( $\delta$ ), and calibrated by using residual undeuterated solvent  $\text{CDCl}_3$  (7.26 ppm),  $\text{C}_6\text{D}_6$  (7.16 ppm),  $(\text{CD}_3)_2\text{CO}$  (2.05 ppm) or tetramethylsilane (0.00 ppm) as internal reference for  $^1\text{H}$  NMR and the deuterated solvent  $\text{CDCl}_3$  (77.00 ppm),  $\text{C}_6\text{D}_6$  (128.06 ppm),  $(\text{CD}_3)_2\text{CO}$  (29.84 ppm) or tetramethylsilane (0.00 ppm) as internal standard for  $^{13}\text{C}$  NMR. High-resolution mass spectral analysis (HRMS) data was measured on a Bruker impact II (Q-TOF) mass spectrum by means of the ESI technique. Crystallographic data were obtained from a Bruker D8 VENTURE diffractometer.

## 2. Screening Conditions

**Table S1.** Screening Conditions for **3a**<sup>a</sup>

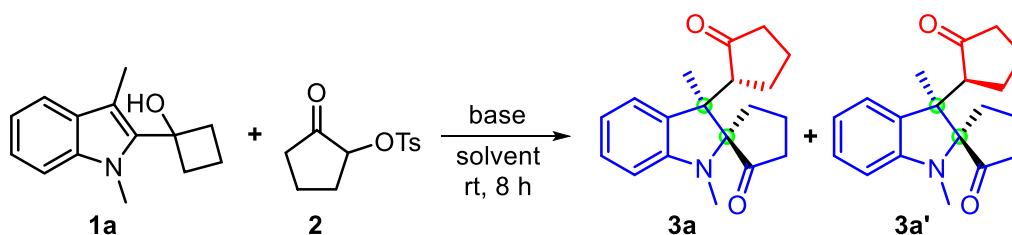

| entry | base (3.0 equiv.)               | solvent                         | yield (%) <sup>b</sup> | d.r. <sup>c</sup> |
|-------|---------------------------------|---------------------------------|------------------------|-------------------|
| 1     | Li <sub>2</sub> CO <sub>3</sub> | CH <sub>2</sub> Cl <sub>2</sub> | <5                     | -                 |
| 2     | K <sub>3</sub> PO <sub>4</sub>  | CH <sub>2</sub> Cl <sub>2</sub> | 53                     | 6.1:1             |
| 3     | KHCO <sub>3</sub>               | CH <sub>2</sub> Cl <sub>2</sub> | <5                     | -                 |
| 4     | K <sub>2</sub> HPO <sub>4</sub> | CH <sub>2</sub> Cl <sub>2</sub> | <5                     | -                 |
| 5     | DIPEA                           | CH <sub>2</sub> Cl <sub>2</sub> | 71                     | 6.3:1             |
| 6     | DIPA                            | CH <sub>2</sub> Cl <sub>2</sub> | 80                     | 5.9:1             |
| 7     | Et <sub>3</sub> N               | Dichloroethane                  | 81                     | 5.5:1             |
| 8     | Et <sub>3</sub> N               | CCl <sub>4</sub>                | 71                     | 4.9:1             |
| 9     | Et <sub>3</sub> N               | Benzotrifluoride                | 75                     | 6.1:1             |
| 10    | Et <sub>3</sub> N               | EA                              | 59                     | 3.9:1             |
| 11    | Et <sub>3</sub> N               | CH <sub>3</sub> NO <sub>2</sub> | 53                     | 5.7:1             |
| 12    | Et <sub>3</sub> N               | CH <sub>3</sub> OH              | <5                     | -                 |
| 13    | Et <sub>3</sub> N               | DMF                             | <5                     | -                 |
| 14    | Et <sub>3</sub> N               | DMSO                            | <5                     | -                 |

<sup>a</sup>Reaction conditions: Unless otherwise noted, the reaction was conducted with **1a** (0.1 mmol) and **2** (0.15 mmol) at room temperature under Ar. <sup>b</sup>Isolated yield. <sup>c</sup>The ratio was determined by <sup>1</sup>H-NMR.

After the screening results in Table 1 and Table S1, we found that the d.r. value of the reaction changes greatly when TFE was used as the solvent, and the reaction results of organic bases and inorganic bases in different solvents were also different. Therefore, we decided to use TFE as the solvent for a new round of condition optimization. Fortunately, we found that when the reaction was performed in presence of 3.0 equiv. of Cs<sub>2</sub>CO<sub>3</sub> in TFE, product **3a'** was obtained in 54% yield with 6.8 :1 d.r. value (entry 8, Table S2). In addition, in Scheme 2, when we use TFE as the reaction solvent, By-products by eliminating

hydroxyl groups are generated during the reaction, which leads to a decrease in the reaction yield. This is why it is necessary to add an equivalent amount of base to neutralize the acid generated in the reaction.

**Table S2.** Screening Conditions for **3a**<sup>a</sup>

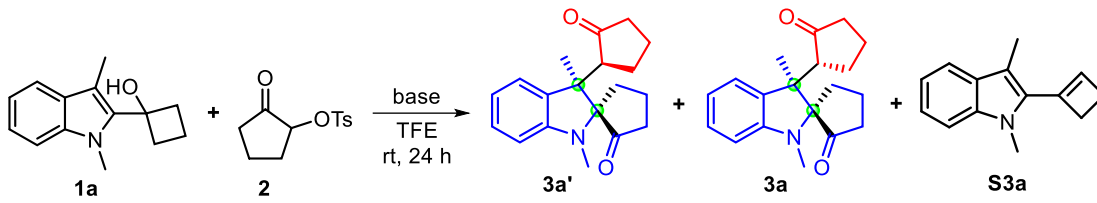

The reaction scheme shows the reaction of compound **1a** (1-methyl-2-(cyclopropylidene)indole-3-carboxamide) and compound **2** (4-(tosyloxy)cyclopentanone) in the presence of a base in TFE at room temperature for 24 hours. The products are **3a'** (a dimeric indole derivative with a cyclopentanone ring), **3a** (another dimeric indole derivative), and **S3a** (1-methyl-2-(cyclopropylidene)indole).

| entry    | base (3.0 equiv.)                   | yield (%) <sup>b</sup> | d.r. <sup>c</sup> |
|----------|-------------------------------------|------------------------|-------------------|
| 1        | Et <sub>3</sub> N                   | 55                     | 1:1.4             |
| 2        | DIPEA                               | 53                     | 1:1.5             |
| 3        | DIPA                                | 24                     | 1:1.3             |
| 4        | Na <sub>2</sub> CO <sub>3</sub>     | 45                     | 1:1.5             |
| 5        | KHCO <sub>3</sub>                   | 19                     | 1.8:1             |
| 6        | K <sub>2</sub> CO <sub>3</sub>      | 58                     | 3.7:1             |
| 7        | K <sub>3</sub> PO <sub>4</sub>      | 55                     | 2.4:1             |
| <b>8</b> | <b>Cs<sub>2</sub>CO<sub>3</sub></b> | <b>54</b>              | <b>6.8:1</b>      |
| 9        | CsOH                                | 36                     | 2.2:1             |
| 10       | Cs <sub>2</sub> TiO <sub>3</sub>    | 50                     | 5.7:1             |

<sup>a</sup>Reaction conditions: Unless otherwise noted, the reaction was conducted with **1a** (0.1 mmol) and **2** (0.15 mmol) at room temperature under Ar. <sup>b</sup>Isolated yield. <sup>c</sup>The ratio was determined by <sup>1</sup>H-NMR.

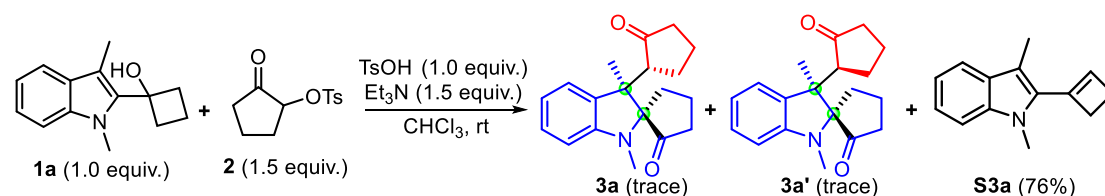

The substrate **1a** (0.1 mmol, 1.0 equiv.) and Et<sub>3</sub>N (0.15 mmol, 1.5 equiv.) were dissolved in CHCl<sub>3</sub> (2.0 mL) under argon atmosphere. Then, the substrate **2** (0.15 mmol, 1.5 equiv.) and TsOH (0.1 mmol, 1.0 equiv.) were added to the reaction system. After 1 h at room temperature, the substrate **1a** has been completely consumed by TLC monitoring. The reaction produces a main product **S3a** under this reaction condition.



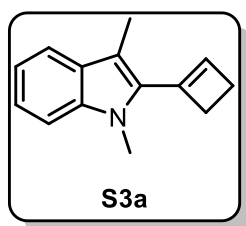

<sup>1</sup>H NMR (400 MHz, CDCl<sub>3</sub>, ppm): δ 7.54 (dt, *J* = 8.0, 1.0 Hz, 1H), 7.25-7.17 (m, 2H), 7.08 (ddd, *J* = 8.0, 6.4, 1.4 Hz, 1H), 6.19 (t, *J* = 1.4 Hz, 1H), 3.79 (s, 3H), 3.17-3.12 (m, 2H), 2.71-2.67 (m, 2H), 2.40 (s, 3H). <sup>13</sup>C NMR (100 MHz, CDCl<sub>3</sub>, ppm): δ 138.9, 137.4, 131.1, 129.5, 128.2, 122.1, 118.8, 118.8, 110.4, 108.7, 32.9, 31.2, 29.3, 9.5.

### 3. Preparation of Substrates 1 and Analytic Data

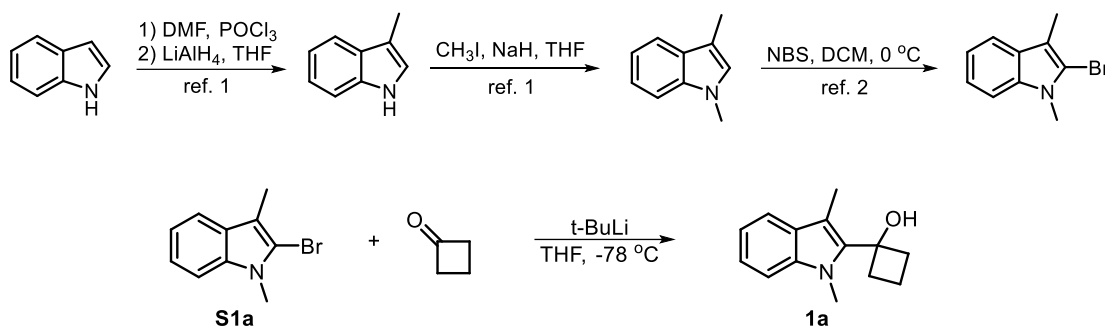

A 100 mL dried round bottom flask equipped with compound **S1a** (2.23 g, 10 mmol, 1.0 equiv.) and a magnetic stirring bar was charged with anhydrous THF (40 mL) under argon atmosphere. Then t-BuLi (1.6 mol/L in hexane) (11.25 mL, 18 mmol, 1.8 equiv.) was added very slowly under argon atmosphere at -78 °C and stirred for 30 mins at -78 °C, then cyclobutanone (1.40 g, 20 mmol, 2.0 equiv.) was added at -78 °C under argon atmosphere, and the reaction mixture was stirred for 30 mins at -78 °C. The reaction was quenched by addition of a saturated solution of NH<sub>4</sub>Cl (20 mL) with stirred and the reaction mixture was extracted with EtOAc (3 × 30 mL). The combined organic layer was wash with brine, dried over MgSO<sub>4</sub> and concentrated under vacuum. Purification of the residue by column chromatography on silica gel (petroleum ether/ethyl acetate = 30:1-10:1) provided the compound **1a** (1.76 g, 82% yield) as a white solid.

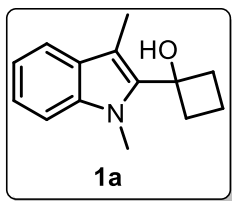

$R_f = 0.40$  (petroleum ether/ethyl acetate = 5:1).  $^1\text{H NMR}$  (400 MHz,  $\text{CDCl}_3$ , ppm):  $\delta$  7.50 (d,  $J = 8.0$  Hz, 1H), 7.24-7.15 (m, 2H), 7.12-7.01 (m, 1H), 3.64 (s, 3H), 2.91-2.77 (m, 2H), 2.50-2.39 (m, 2H), 2.39-2.28 (m, 4H), 2.23 (d,  $J = 5.7$  Hz, 1H), 1.96-1.82 (m, 1H).  $^{13}\text{C NMR}$  (100 MHz,  $\text{CDCl}_3$ , ppm):  $\delta$  138.0, 137.1, 128.2, 122.0, 118.7, 118.6, 108.6, 106.7, 75.2, 36.7, 30.8, 16.9, 9.7. **HRMS (ESI)** calcd for  $[\text{M}+\text{Na}]^+$   $\text{C}_{14}\text{H}_{17}\text{NNaO}$ ,  $m/z$ : 238.1202, found: 238.1204.

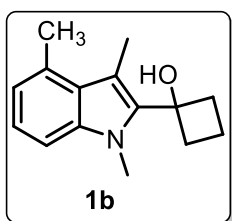

The compound **1b** (2.31 g, 80% yield) as a white solid was prepared from **S1b** (2.99 g, 12.6 mmol) according to general procedure with petroleum ether/ethyl acetate = 30:1-10:1 as eluent.

$R_f = 0.40$  (petroleum ether/ethyl acetate = 5:1).  $^1\text{H NMR}$  (500 MHz,  $\text{C}_6\text{D}_6$ , ppm):  $\delta$  7.19-7.13 (m, 1H), 6.96-6.88 (m, 2H), 3.21 (s, 3H), 2.68 (s, 3H), 2.54-2.46 (m, 2H), 2.35 (s, 3H), 2.34-2.29 (m, 1H), 2.26-2.21 (m, 2H), 1.73-1.64 (m, 1H).  $^{13}\text{C NMR}$  (125 MHz,  $\text{C}_6\text{D}_6$ , ppm):  $\delta$  138.4, 138.2, 131.3, 128.1, 127.3, 122.2, 121.4, 108.2, 107.3, 75.4, 37.5, 30.7, 21.2, 17.8, 12.6. **HRMS (ESI)** calcd for  $[\text{M}+\text{Na}]^+$   $\text{C}_{15}\text{H}_{19}\text{NNaO}$ ,  $m/z$ : 252.1359, found: 252.1362.

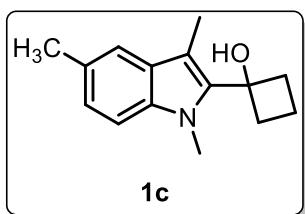

The compound **1c** (1.74 g, 76% yield) as a white solid was prepared from **S1c** (2.37 g, 10 mmol) according to general procedure with petroleum ether/ethyl acetate = 30:1-10:1 as eluent.

$R_f = 0.40$  (petroleum ether/ethyl acetate = 5:1).  $^1\text{H NMR}$  (400 MHz,  $\text{CDCl}_3$ , ppm):  $\delta$  7.28 (s, 1H), 7.08 (d,  $J = 8.2$  Hz, 1H), 7.04-6.97 (m, 1H), 3.60 (s, 3H), 2.89-2.75 (m, 2H), 2.44 (s, 3H), 2.43-2.31 (m, 3H),

2.28 (s, 3H), 2.16 (s, 1H), 1.95-1.82 (m, 1H).  $^{13}\text{C}$  NMR (100 MHz,  $\text{CDCl}_3$ , ppm):  $\delta$  138.1, 135.6, 128.4, 127.8, 123.6, 118.3, 108.4, 106.2, 75.3, 36.7, 30.8, 21.4, 16.9, 9.7. **HRMS (ESI)** calcd for  $[\text{M}+\text{H}]^+$   $\text{C}_{15}\text{H}_{19}\text{NNaO}$ ,  $m/z$ : 252.1359, found: 252.1360.

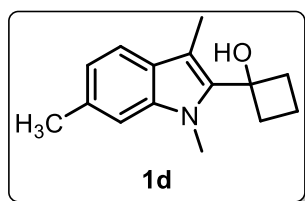

The compound **1d** (2.37 g, 70% yield) as a white solid was prepared from **S1d** (3.51 g, 14.8 mmol) according to general procedure with petroleum ether/ethyl acetate = 30:1-10:1 as eluent.

$R_f$  = 0.40 (petroleum ether/ethyl acetate = 5:1).  $^1\text{H}$  NMR (500 MHz,  $\text{C}_6\text{D}_6$ , ppm):  $\delta$  7.43 (d,  $J$  = 8.5 Hz, 1H), 7.13 (d,  $J$  = 8.5 Hz, 1H), 6.26 (d,  $J$  = 1.0 Hz, 1H), 3.26 (s, 3H), 2.73-2.66 (m, 2H), 2.55 (s, 3H), 2.49-2.43 (m, 2H), 2.29 (s, 3H), 2.24-2.15 (m, 1H), 1.81 (s, 1H), 1.70-1.63 (m, 1H).  $^{13}\text{C}$  NMR (500 MHz,  $\text{C}_6\text{D}_6$ , ppm):  $\delta$  138.0, 137.9, 130.4, 129.8, 128.1, 120.9, 117.7, 116.2, 109.2, 79.7, 37.8, 36.8, 15.7, 15.4, 9.7. **HRMS (ESI)** calcd for  $[\text{M}+\text{Na}]^+$   $\text{C}_{15}\text{H}_{19}\text{NNaO}$ ,  $m/z$ : 252.1359, found: 252.1360.

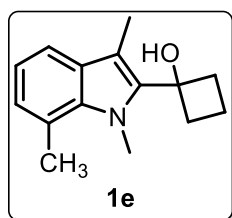

The compound **1e** (1.51 g, 66% yield) as a white solid was prepared from **S1e** (2.37 g, 10 mmol) according to general procedure with petroleum ether/ethyl acetate = 30:1-10:1 as eluent.

$R_f$  = 0.40 (petroleum ether/ethyl acetate = 5:1).  $^1\text{H}$  NMR (400 MHz,  $\text{CDCl}_3$ , ppm):  $\delta$  7.33 (d,  $J$  = 7.6 Hz, 1H), 6.93 (t,  $J$  = 7.4 Hz, 1H), 6.87 (d,  $J$  = 7.2 Hz, 1H), 3.88 (s, 3H), 2.90-2.79 (m, 2H), 2.70 (s, 3H), 2.50-2.40 (m, 2H), 2.40-2.31 (m, 1H), 2.27 (s, 3H), 2.16 (s, 1H), 1.94-1.84 (m, 1H).  $^{13}\text{C}$  NMR (100 MHz,  $\text{CDCl}_3$ , ppm):  $\delta$  138.8, 136.2, 129.1, 125.2, 120.8, 118.9, 116.7, 107.1, 75.3, 37.0, 33.8, 20.4, 16.9, 9.8. **HRMS (ESI)** calcd for  $[\text{M}+\text{Na}]^+$   $\text{C}_{15}\text{H}_{19}\text{NNaO}$ ,  $m/z$ : 252.1359, found: 252.1359.

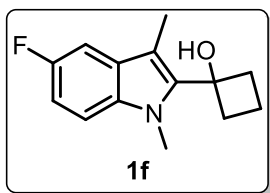

The compound **1f** (1.82 g, 78% yield) as a white solid was prepared from **S1f** (2.41 g, 10 mmol) according to general procedure with petroleum ether/ethyl acetate = 30:1-10:1 as eluent.

$R_f$  = 0.40 (petroleum ether/ethyl acetate = 5:1). **<sup>1</sup>H NMR** (500 MHz, C<sub>6</sub>D<sub>6</sub>, ppm): δ 7.26 (dd,  $J$  = 9.5, 2.5 Hz, 1H), 6.99 (td,  $J$  = 9.0, 2.5 Hz, 1H), 6.74 (dd,  $J$  = 9.0, 4.5 Hz, 1H), 3.15 (s, 3H), 2.48-2.40 (m, 2H), 2.24-2.17 (m, 1H), 2.13 (ddd,  $J$  = 11.6, 8.9, 5.1 Hz, 3H), 2.06 (s, 3H), 1.67-1.58 (m, 1H). **<sup>13</sup>C NMR** (125 MHz, C<sub>6</sub>D<sub>6</sub>, ppm): δ 158.3 (d,  $J$  = 233.3 Hz), 140.0, 134.2, 129.3 (d,  $J$  = 9.2 Hz), 110.3 (d,  $J$  = 26.0 Hz), 109.7 (d,  $J$  = 9.5 Hz), 106.8 (d,  $J$  = 4.8 Hz), 103.9 (d,  $J$  = 23.0 Hz), 75.0, 36.8, 30.7, 17.2, 9.8. **<sup>19</sup>F NMR** (471 MHz, C<sub>6</sub>D<sub>6</sub>, ppm): δ -125.5. **HRMS (ESI)** calcd for [M+H]<sup>+</sup> C<sub>14</sub>H<sub>17</sub>FNO, m/z: 234.1289, found: 234.1290.

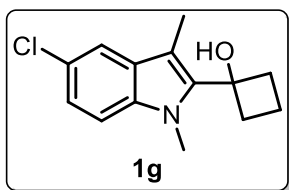

The compound **1g** (1.99 g, 80% yield) as a white solid was prepared from **S1g** (2.57 g, 10 mmol) according to general procedure with petroleum ether/ethyl acetate = 30:1-10:1 as eluent.

$R_f$  = 0.40 (petroleum ether/ethyl acetate = 5:1). **<sup>1</sup>H NMR** (400 MHz, (CD<sub>3</sub>)<sub>2</sub>CO, ppm): δ 7.48 (d,  $J$  = 2.0 Hz, 1H), 7.26 (d,  $J$  = 8.4 Hz, 1H), 7.10 (dd,  $J$  = 8.4, 2.0 Hz, 1H), 4.71 (s, 1H), 3.70 (s, 3H), 2.82 (ddd,  $J$  = 17.2, 8.8, 2.8 Hz, 2H), 2.51-2.44 (m, 2H), 2.43-2.33 (m, 1H), 2.29 (s, 3H), 1.94-1.84 (m, 1H). **<sup>13</sup>C NMR** (100 MHz, (CD<sub>3</sub>)<sub>2</sub>CO, ppm): δ 141.7, 136.4, 130.5, 124.5, 122.0, 118.4, 110.9, 106.4, 74.9, 37.4, 31.4, 17.6, 9.8. **HRMS (ESI)** calcd for [M+H]<sup>+</sup> C<sub>14</sub>H<sub>17</sub>ClNO, m/z: 250.0993, found: 250.0995.

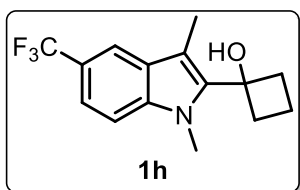

The compound **1h** (2.12 g, 75% yield) as a white solid was prepared from **S1h** (2.91 g, 10 mmol) according to general procedure with petroleum ether/ethyl acetate = 30:1-10:1 as eluent.

$R_f = 0.35$  (petroleum ether/ethyl acetate = 5:1).  $^1\text{H NMR}$  (400 MHz,  $\text{CDCl}_3$ , ppm):  $\delta$  7.83-7.76 (m, 1H), 7.41 (dd,  $J = 8.6, 1.8$  Hz, 1H), 7.29-7.22 (m, 1H), 3.70 (s, 3H), 2.92-2.81 (m, 2H), 2.54-2.37 (m, 3H), 2.35 (s, 3H), 2.10 (s, 1H), 2.00-1.88 (m, 1H).  $^{13}\text{C NMR}$  (100 MHz,  $\text{CDCl}_3$ , ppm):  $\delta$  139.1 (d,  $J = 131.8$  Hz), 125.5 (q,  $J = 269.5$  Hz), 121.1 (q,  $J = 31.7$  Hz), 118.7 (d,  $J = 3.5$  Hz), 116.5 (q,  $J = 4.3$  Hz), 108.9, 107.8, 75.1, 36.7, 31.1, 17.0, 9.6.  $^{19}\text{F NMR}$  (376 MHz,  $\text{CDCl}_3$ , ppm):  $\delta$  -60.0. **HRMS (ESI)** calcd for  $[\text{M}+\text{Na}]^+ \text{C}_{15}\text{H}_{16}\text{F}_3\text{NNaO}$ ,  $m/z$ : 306.1076, found: 306.1076.

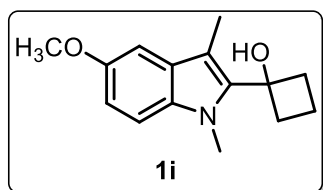

The compound **1i** (2.11 g, 86% yield) as a white solid was prepared from **S1i** (2.53 g, 10 mmol) according to general procedure with petroleum ether/ethyl acetate = 30:1-10:1 as eluent.

$R_f = 0.40$  (petroleum ether/ethyl acetate = 5:1).  $^1\text{H NMR}$  (400 MHz,  $\text{CDCl}_3$ , ppm):  $\delta$  7.13 (d,  $J = 8.7$  Hz, 1H), 6.98 (d,  $J = 2.4$  Hz, 1H), 6.89 (dd,  $J = 8.8, 2.4$  Hz, 1H), 3.88 (s, 3H), 3.67 (d,  $J = 2.1$  Hz, 3H), 2.94-2.83 (m, 2H), 2.54-2.46 (m, 2H), 2.46-2.36 (m, 1H), 2.32 (s, 3H), 2.26 (s, 1H), 1.99-1.89 (m, 1H).  $^{13}\text{C NMR}$  (100 MHz,  $\text{CDCl}_3$ , ppm):  $\delta$  153.6, 138.7, 132.5, 128.4, 112.1, 109.4, 106.3, 100.7, 75.3, 56.0, 36.7, 31.0, 17.0, 9.8. **HRMS (ESI)** calcd for  $[\text{M}+\text{Na}]^+ \text{C}_{15}\text{H}_{19}\text{NNaO}_2$ ,  $m/z$ : 268.1308, found: 268.1308.

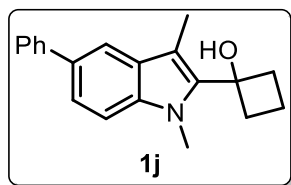

The compound **1j** (2.33 g, 80% yield) as a white solid was prepared from **S1j** (2.99 g, 10 mmol) according to general procedure with petroleum ether/ethyl acetate = 30:1-10:1 as eluent.

$R_f = 0.40$  (petroleum ether/ethyl acetate = 5:1).  $^1\text{H NMR}$  (500 MHz,  $\text{CDCl}_3$ , ppm):  $\delta$  7.76 (d,  $J = 1.8$  Hz, 1H), 7.71-7.66 (m, 2H), 7.50 (dd,  $J = 8.4, 1.8$  Hz, 1H), 7.46 (t,  $J = 7.7$  Hz, 2H), 7.33 (td,  $J = 8.5, 1.9$  Hz, 2H), 3.75 (s, 3H), 2.97-2.87 (m, 2H), 2.57-2.50 (m, 2H), 2.48-2.43 (m, 1H), 2.42 (s, 3H), 2.05 (s, 1H), 2.01-1.92 (m, 1H).  $^{13}\text{C NMR}$  (125 MHz,  $\text{CDCl}_3$ , ppm):  $\delta$  142.7, 138.7, 136.8, 132.4, 128.7, 128.6, 127.3, 126.2, 121.9, 117.3, 109.0, 107.2, 75.3, 36.8, 31.1, 17.0, 9.8. **HRMS (ESI)** calcd for  $[\text{M}+\text{Na}]^+ \text{C}_{20}\text{H}_{21}\text{NNaO}$ ,  $m/z$ : 314.1515, found: 314.1512.

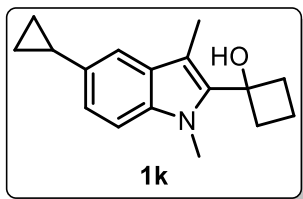

The compound **1k** (2.04 g, 80% yield) as a white solid was prepared from **S1k** (2.63 g, 10 mmol) according to general procedure with petroleum ether/ethyl acetate = 30:1-10:1 as eluent.

$R_f$  = 0.40 (petroleum ether/ethyl acetate = 5:1).  $^1\text{H NMR}$  (500 MHz,  $\text{C}_6\text{D}_6$ , ppm):  $\delta$  7.44 (d,  $J$  = 5.0 Hz, 1H), 7.07 (d,  $J$  = 8.5 Hz, 1H), 6.97 (d,  $J$  = 8.5 Hz, 1H), 3.23 (s, 3H), 2.50 (dd,  $J$  = 17.5, 8.5 Hz, 2H), 2.34-2.27 (m, 1H), 2.27-2.14 (m, 7H), 2.05 (ddd,  $J$  = 10.5, 8.5, 5.5 Hz, 1H), 1.69-1.61 (m, 1H), 0.89-0.85 (m, 2H), 0.82-0.78 (m, 2H).  $^{13}\text{C NMR}$  (126 MHz,  $\text{C}_6\text{D}_6$ , ppm):  $\delta$  138.6, 136.6, 134.1, 129.2, 121.2, 116.1, 108.9, 106.4, 75.2, 36.9, 30.7, 17.3, 16.3, 10.0, 8.9. **HRMS (ESI)** calcd for  $[\text{M}+\text{Na}]^+$   $\text{C}_{17}\text{H}_{21}\text{NNaO}$ ,  $m/z$ : 278.1515, found: 278.1516.

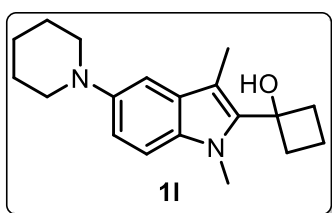

The compound **1l** (1.64 g, 55% yield) as a white solid was prepared from **S1l** (3.06 g, 10 mmol) according to general procedure with petroleum ether/ethyl acetate = 30:1-10:1 as eluent.

$R_f$  = 0.3 (petroleum ether/ethyl acetate = 1:1).  $^1\text{H NMR}$  (500 MHz,  $\text{C}_6\text{D}_6$ , ppm):  $\delta$  7.29 (d,  $J$  = 2.0 Hz, 1H), 7.15 (d,  $J$  = 2.0 Hz, 1H), 7.02 (d,  $J$  = 8.5 Hz, 1H), 3.30 (s, 3H), 3.14-3.08 (m, 4H), 2.61-2.55 (m, 2H), 2.31-2.22 (m, 6H), 1.72-1.67 (m, 5H), 1.46-1.40 (m, 2H), 0.50 (s, 1H).  $^{13}\text{C NMR}$  (125 MHz,  $\text{C}_6\text{D}_6$ , ppm):  $\delta$  147.5, 138.6, 133.8, 129.4, 117.1, 109.4, 107.2, 106.4, 75.2, 54.1, 37.1, 30.8, 27.0, 24.9, 17.3, 10.2. **HRMS (ESI)** calcd for  $[\text{M}+\text{H}]^+$   $\text{C}_{19}\text{H}_{27}\text{N}_2\text{O}$ ,  $m/z$ : 299.2118, found: 299.2120.

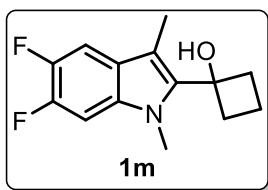

The compound **1m** (1.91 g, 76% yield) as a white solid was prepared from **S1m** (2.59 g, 10 mmol) according to general procedure with petroleum ether/ethyl acetate = 30:1-10:1 as eluent.

$R_f$  = 0.35 (petroleum ether/ethyl acetate = 5:1). **<sup>1</sup>H NMR** (500 MHz, C<sub>6</sub>D<sub>6</sub>, ppm): δ 7.17-7.12 (m, 1H), 6.65 (dd,  $J$  = 10.5, 6.5 Hz, 1H), 3.03 (s, 3H), 2.45-2.38 (m, 2H), 2.24-2.15 (m, 1H), 2.13-2.07 (m, 2H), 1.99 (s, 3H), 1.75 (s, 1H), 1.66-1.58 (m, 1H). **<sup>13</sup>C NMR** (125 MHz, C<sub>6</sub>D<sub>6</sub>, ppm): δ 149.54 (d,  $J$  = 15.8 Hz), 147.58 (dd,  $J$  = 15.3, 11.4 Hz), 145.66 (d,  $J$  = 14.9 Hz), 139.73 (d,  $J$  = 4.0 Hz), 132.70 (d,  $J$  = 9.8 Hz), 123.99 (d,  $J$  = 7.2 Hz), 106.83 (dd,  $J$  = 4.4, 1.5 Hz), 105.60 (d,  $J$  = 18.6 Hz), 97.07 (d,  $J$  = 21.7 Hz), 74.79, 36.69, 30.84, 17.15, 9.74. **<sup>19</sup>F NMR** (471 MHz, C<sub>6</sub>D<sub>6</sub>, ppm) δ -143.80, -143.85, -148.75, -148.79. **HRMS (ESI)** calcd for [M+H]<sup>+</sup> C<sub>14</sub>H<sub>16</sub>F<sub>2</sub>NO, m/z: 252.1194, found: 252.1195.

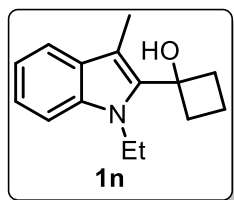

The compound **1n** (1.53 g, 67% yield) as a white solid was prepared from **S1n** (2.37 g, 10 mmol) according to general procedure with petroleum ether/ethyl acetate = 30:1-10:1 as eluent.

$R_f$  = 0.3 (petroleum ether/ethyl acetate = 5:1). **<sup>1</sup>H NMR** (400 MHz, (CD<sub>3</sub>)<sub>2</sub>CO, ppm): δ 7.46 (dt,  $J$  = 9.5, 1.5 Hz, 1H), 7.28 (dt,  $J$  = 10.0, 1.0 Hz, 1H), 7.10 (ddd,  $J$  = 9.5, 7.0, 1.5 Hz, 1H), 6.99 (ddd,  $J$  = 9.5, 7.0, 1.5 Hz, 1H), 4.56 (s, 1H), 4.22 (q,  $J$  = 9.0 Hz, 2H), 2.92-2.82 (m, 2H), 2.51-2.42 (m, 2H), 2.41-2.33 (m, 1H), 2.28 (s, 3H), 1.94-1.85 (m, 1H), 1.33 (t,  $J$  = 9 Hz, 3H). **<sup>13</sup>C NMR** (100 MHz, (CD<sub>3</sub>)<sub>2</sub>CO, ppm): δ 139.7, 137.0, 129.9, 122.1, 119.2, 119.1, 109.8, 106.4, 75.3, 39.4, 37.8, 18.0, 15.3, 10.0. **HRMS (ESI)** calcd for [M+Na]<sup>+</sup> C<sub>15</sub>H<sub>19</sub>NNaO, m/z: 252.1359, found: 252.1359.

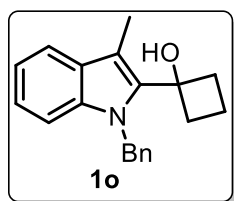

The compound **1o** (1.69 g, 58% yield) as a white solid was prepared from **S1o** (2.99 g, 10 mmol) according to general procedure with petroleum ether/ethyl acetate = 20:1-10:1 as eluent.

$R_f = 0.40$  (petroleum ether/ethyl acetate = 5:1).  $^1\text{H NMR}$  (500 MHz,  $\text{C}_6\text{D}_6$ , ppm):  $\delta$  7.65 (d,  $J = 8.0$  Hz, 1H), 7.21 (td,  $J = 7.0, 0.5$  Hz, 1H), 7.17-7.12 (m, 2H), 7.01-6.93 (m, 4H), 6.81-6.75 (m, 2H), 5.20 (s, 2H), 2.55-2.47 (m, 2H), 2.28 (s, 3H), 2.24-2.16 (m, 1H), 2.15-2.07 (m, 3H), 1.59-1.51 (m, 1H).  $^{13}\text{C NMR}$  (125 MHz,  $\text{C}_6\text{D}_6$ , ppm):  $\delta$  139.2, 138.7, 137.8, 129.4, 128.8, 127.0, 126.0, 122.8, 119.7, 119.2, 110.2, 107.5, 75.2, 47.7, 37.2, 17.6, 10.1. **HRMS (ESI)** calcd for  $[\text{M}+\text{Na}]^+$   $\text{C}_{20}\text{H}_{21}\text{NNaO}$ ,  $m/z$ : 314.1515, found: 314.1514.

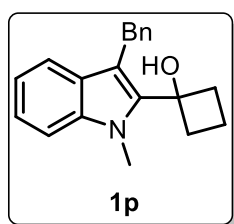

The compound **1p** (1.75 g, 60% yield) as a white solid was prepared from **S1p** (2.99 g, 10 mmol) according to general procedure with petroleum ether/ethyl acetate = 20:1-10:1 as eluent.

$R_f = 0.40$  (petroleum ether/ethyl acetate = 5:1).  $^1\text{H NMR}$  (500 MHz,  $\text{C}_6\text{D}_6$ , ppm):  $\delta$  7.56 (d,  $J = 8.0$  Hz, 1H), 7.33-7.28 (m, 1H), 7.20-7.15 (m, 4H), 7.13-7.08 (m, 3H), 7.04-7.00 (m, 1H), 4.15 (s, 2H), 3.35 (s, 3H), 2.61-2.51 (m, 2H), 2.23-2.15 (m, 3H), 1.79 (s, 1H), 1.61-1.53 (m, 1H).  $^{13}\text{C NMR}$  (125 MHz,  $\text{C}_6\text{D}_6$ , ppm):  $\delta$  142.3, 139.4, 138.0, 129.1, 128.7, 128.4, 126.1, 122.5, 119.7, 119.6, 109.9, 109.3, 74.9, 36.8, 30.8, 30.4, 17.3. **HRMS (ESI)** calcd for  $[\text{M}+\text{Na}]^+$   $\text{C}_{20}\text{H}_{21}\text{NNaO}$ ,  $m/z$ : 314.1515, found: 314.1520.

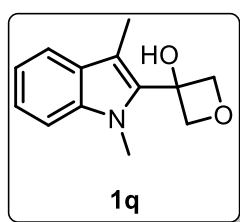

The compound **1q** (1.80 g, 83% yield) as a white solid was prepared from **S1a** (2.23 g, 10 mmol) and oxetan-3-one (1.44 g, 20 mmol) according to general procedure with petroleum ether/ethyl acetate = 30:1-10:1 as eluent.

$R_f = 0.40$  (petroleum ether/ethyl acetate = 5:1).  $^1\text{H NMR}$  (400 MHz,  $\text{CDCl}_3$ , ppm):  $\delta$  7.51 (d,  $J = 10.0$  Hz, 1H), 7.27-7.17 (m, 2H), 7.10 (t,  $J = 9.5$  Hz, 1H), 5.27 (d,  $J = 8.5$  Hz, 2H), 4.84 (d,  $J = 8.5$  Hz, 2H), 3.46 (s, 3H), 3.03 (s, 1H), 2.18 (s, 3H).  $^{13}\text{C NMR}$  (100 MHz,  $\text{CDCl}_3$ , ppm):  $\delta$  137.2, 134.2, 127.9, 122.7, 119.2, 119.0, 108.9, 107.9, 83.2, 73.4, 30.3, 9.4. **HRMS (ESI)** calcd for  $[\text{M}+\text{H}]^+$   $\text{C}_{13}\text{H}_{16}\text{NO}_2$ ,  $m/z$ :



218.1176, found: 218.1175.

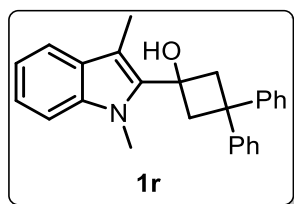

The compound **1r** (3.12 g, 85% yield) as a white solid was prepared from **S1a** (2.23 g, 10 mmol) and 3,3-diphenylcyclobutan-1-one (4.44 g, 20 mmol) according to general procedure with petroleum ether/ethyl acetate = 30:1-5:1 as eluent.

$R_f$  = 0.30 (petroleum ether/ethyl acetate = 5:1).  $^1\text{H NMR}$  (500 MHz,  $\text{C}_6\text{D}_6$ , ppm):  $\delta$  7.62 (d,  $J$  = 8.0 Hz, 1H), 7.44-7.40 (m, 2H), 7.34-7.30 (m, 1H), 7.27-7.23 (m, 1H), 7.20 (t,  $J$  = 7.5 Hz, 2H), 7.12-7.00 (m, 7H), 6.94-6.90 (m, 1H), 3.40 (dd,  $J$  = 10.5, 3.0 Hz, 2H), 3.30-3.25 (m, 5H), 2.22 (s, 3H), 1.60 (s, 1H).  $^{13}\text{C NMR}$  (125 MHz,  $\text{C}_6\text{D}_6$ , ppm):  $\delta$  151.0, 149.1, 138.3, 137.9, 129.2, 128.7, 128.6, 127.2, 126.1, 125.9, 125.8, 122.4, 119.3, 119.2, 109.2, 107.0, 70.6, 49.9, 46.8, 30.7, 10.1. **HRMS (ESI)** calcd for  $[\text{M}+\text{Na}]^+$   $\text{C}_{26}\text{H}_{25}\text{NNaO}$ ,  $m/z$ : 390.1828, found: 390.1828.

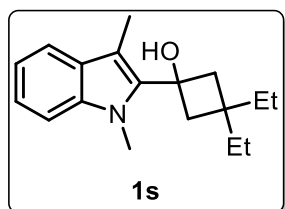

The compound **1s** (2.26 g, 83% yield) as a white solid was prepared from **S1a** (2.23 g, 10 mmol) and 3,3-diethylcyclobutan-1-one (2.52 g, 20 mmol) according to general procedure with petroleum ether/ethyl acetate = 30:1-5:1 as eluent.

$R_f$  = 0.30 (petroleum ether/ethyl acetate = 5:1).  $^1\text{H NMR}$  (400 MHz,  $\text{CDCl}_3$ , ppm):  $\delta$  7.52 (d,  $J$  = 8.0, 1H), 7.25-7.18 (m, 2H), 7.12-7.05 (m, 1H), 3.70 (s, 3H), 2.66-2.58 (m, 2H), 2.36 (s, 3H), 2.35-2.30 (m, 2H), 1.90 (s, 1H), 1.79 (q,  $J$  = 7.6 Hz, 2H), 1.37 (q,  $J$  = 7.6 Hz, 2H), 0.84 (t,  $J$  = 7.6 Hz, 3H), 0.72 (t,  $J$  = 7.6 Hz, 3H).  $^{13}\text{C NMR}$  (100 MHz,  $\text{CDCl}_3$ , ppm):  $\delta$  139.3, 137.2, 128.4, 122.0, 118.8, 118.7, 108.7, 106.5, 69.8, 46.2, 36.2, 31.0, 30.9, 29.6, 26.9, 10.2, 8.1, 8.0. **HRMS (ESI)** calcd for  $[\text{M}+\text{Na}]^+$   $\text{C}_{18}\text{H}_{25}\text{NNaO}$ ,  $m/z$ : 294.1828, found: 294.1824.

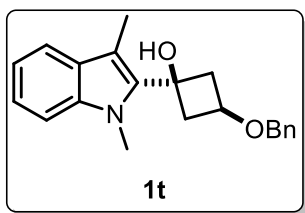

The compound **1t** (2.66 g, 83% yield) as a white solid was prepared from **S1a** (2.23 g, 10 mmol) and 3-(benzyloxy)cyclobutan-1-one (3.52 g, 20 mmol) according to general procedure with petroleum ether/ethyl acetate = 30:1-5:1 as eluent.

$R_f$  = 0.30 (petroleum ether/ethyl acetate = 5:1).  $^1\text{H NMR}$  (500 MHz,  $\text{C}_6\text{D}_6$ , ppm):  $\delta$  7.57 (d,  $J$  = 7.5 Hz, 1H), 7.28-7.22 (m, 3H), 7.22-7.13 (m, 3H), 7.11-7.06 (m, 1H), 7.03 (d,  $J$  = 8.0 Hz, 1H), 4.18 (s, 2H), 3.59-3.52 (m, 1H), 3.27 (s, 3H), 3.06 (s, 1H), 2.92-2.85 (m, 2H), 2.39-2.31 (m, 2H), 2.26 (s, 3H).  $^{13}\text{C NMR}$  (125 MHz,  $\text{C}_6\text{D}_6$ , ppm):  $\delta$  138.8, 138.0, 137.0, 129.1, 128.6, 128.0, 122.4, 119.2, 119.1, 109.1, 107.0, 70.4, 68.8, 67.5, 44.9, 31.1, 10.5. **HRMS (ESI)** calcd for  $[\text{M}+\text{Na}]^+$   $\text{C}_{21}\text{H}_{23}\text{NNaO}_2$ ,  $m/z$ : 344.1621, found: 344.1614.

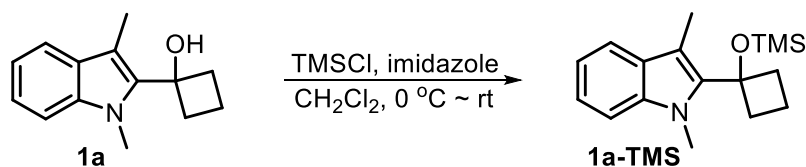

A 15 mL dried round bottom flask equipped with compound **1a** (215 mg, 1 mmol, 1.0 equiv.) and a magnetic stirring bar was charged with anhydrous DCM (5 mL) under argon atmosphere. Imidazole (408 g, 6.0 mmol, 6.0 equiv.) and TMSCl (326 mg, 3.0 mmol, 3.0 equiv.) was added successively under argon atmosphere at 0 °C. The reaction mixture was stirred for 45 mins with natural warming. Then the reaction was quenched by addition of a saturated solution of  $\text{NaHCO}_3$  (5 mL) and the reaction mixture was extracted with DCM (3  $\times$  10 mL). The combined organic layer was washed with brine, dried over  $\text{MgSO}_4$  and concentrated under vacuum, the residue was purified by a flash column chromatography on silica gel (petroleum ether/ethyl acetate = 150:1 to 50:1) to give the compound **1a-TMS** (258 mg, 90% yield) as a white solid.

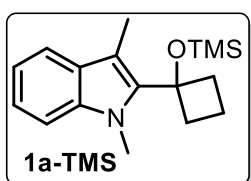

$R_f = 0.60$  (petroleum ether/ethyl acetate = 20:1).  $^1\text{H NMR}$  (400 MHz,  $\text{CDCl}_3$ , ppm):  $\delta$  7.57 (d,  $J = 8.0$  Hz, 1H), 7.29-7.20 (m, 2H), 7.12 (ddd,  $J = 8.0, 6.8, 1.2$  Hz, 1H), 3.72 (s, 3H), 2.94-2.81 (m, 2H), 2.56-2.48 (m, 2H), 2.46 (s, 3H), 2.24-2.10 (m, 1H), 1.86-1.73 (m, 1H), -0.10 (s, 9H).  $^{13}\text{C NMR}$  (100 MHz,  $\text{CDCl}_3$ , ppm):  $\delta$  137.4, 137.1, 128.5, 121.7, 118.6, 118.5, 108.5, 106.1, 76.2, 38.1, 31.1, 15.8, 10.3, 0.9. **HRMS (ESI)** calcd for  $[\text{M}+\text{H}]^+$   $\text{C}_{17}\text{H}_{26}\text{NOSi}$ ,  $m/z$ : 288.1778, found: 288.1779.

**Note:** Substrate **1** is easily converted to hydroxyl elimination products at room temperature or in Chloroform-d with weak acidity. Therefore, substrate **1** was used immediately after preparation. In example **1a**, as shown below:

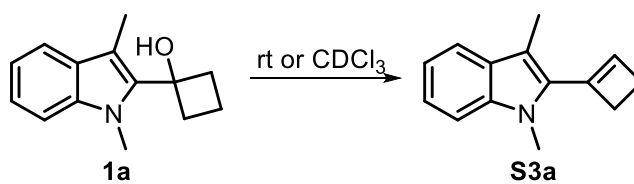

#### 4. General procedure for the Dearomative Oxyallyl Cation Promoted Semipinacol Rearrangement of Indole-type Allylic Alcohols

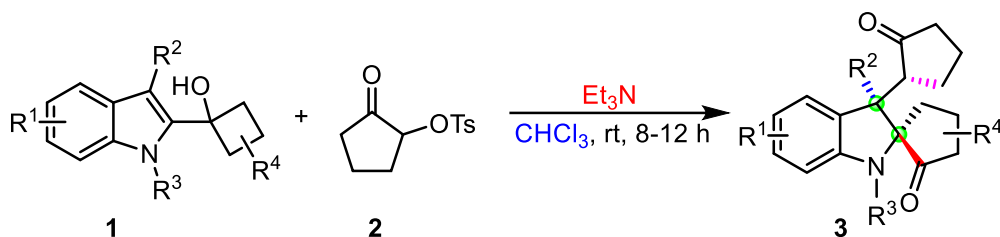

**General procedure A:** The substrates **1** (0.1 mmol, 1.0 equiv.) and  $\text{Et}_3\text{N}$  (0.15 mmol, 1.5 equiv.) were dissolved in  $\text{CHCl}_3$  (2.0 mL) under argon atmosphere. Then, the substrate **2** (0.15 mmol, 1.5 equiv.) was added to the reaction system. After 8-12 h at room temperature, the reaction mixture was concentrated under reduced pressure. The residue was purified by column chromatography on silica gel (petroleum ether/ethyl ether = 10:1~3:1) to afford the desired products **3**.

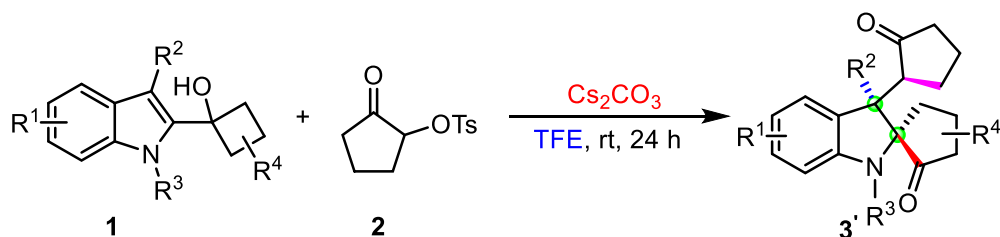

**General procedure B:** The substrates **1** (0.1 mmol, 1.0 equiv.) and  $\text{Cs}_2\text{CO}_3$  (0.30 mmol, 3.0 equiv.) were dissolved in TFE (2.0 mL) under argon atmosphere. Then, the substrate **2** (0.15 mmol, 1.5 equiv.) was added to the reaction system. After 24 h at room temperature, the reaction mixture was concentrated under reduced pressure. The residue was purified by column chromatography on silica gel (petroleum ether/ethyl ether = 10:1~3:1) to afford the desired products **3'**.

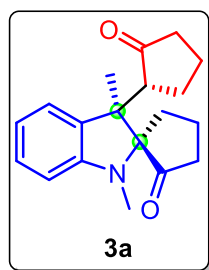

General procedure A was followed using **1a** (21.5 mg, 0.1 mmol) stirred for 8 h at rt. The crude mixture was purified by silica gel flash chromatography (petroleum ether/ethyl ether = 3:1) to afford the desired

product as a mixture of two diastereoisomers (26.4 mg, 89% yield, 10.8:1 dr). The major isomer **3a** was a white crystal after further column chromatography.

$R_f$  = 0.45 (petroleum ether/ethyl acetate = 5:1). **mp**: 101-104 °C.  **$^1\text{H NMR}$**  (400 MHz,  $\text{CDCl}_3$ , ppm):  $\delta$  7.09 (td,  $J$  = 7.6, 0.8 Hz, 1H), 6.94 (d,  $J$  = 7.2 Hz, 1H), 6.69 (t,  $J$  = 7.2 Hz, 1H), 6.31 (d,  $J$  = 8.0 Hz, 1H), 2.63-2.43 (m, 5H), 2.26-2.20 (m, 1H), 2.18-2.02 (m, 5H), 1.95-1.79 (m, 6H), 1.45-1.31 (m, 1H), 1.28-1.20 (m, 1H).  **$^{13}\text{C NMR}$**  (100 MHz,  $\text{CDCl}_3$ , ppm):  $\delta$  220.8, 219.4, 150.2, 134.3, 128.1, 121.5, 117.5, 105.1, 82.9, 61.2, 52.5, 39.8, 37.7, 29.3, 26.6, 26.1, 19.9, 19.7, 17.2. **HRMS (ESI)** calcd for  $[\text{M}+\text{Na}]^+$   $\text{C}_{19}\text{H}_{23}\text{NNaO}_2$ ,  $m/z$ : 320.1621, found: 320.1622.

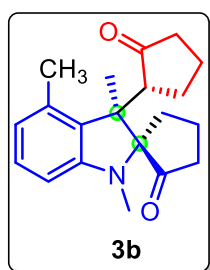

General procedure A was followed using **1b** (22.9 mg, 0.1 mmol) stirred for 8 h at rt. The crude mixture was purified by silica gel flash chromatography (petroleum ether/ethyl ether = 3:1) to afford the desired product as a mixture of two diastereoisomers (23.0 mg, 74% yield, 9.0:1 dr). The major isomer **3b** was a white amorphous solid after further column chromatography.

$R_f$  = 0.45 (petroleum ether/ethyl acetate = 5:1).  **$^1\text{H NMR}$**  (500 MHz,  $\text{C}_6\text{D}_6$ , ppm):  $\delta$  7.02 (t,  $J$  = 7.5 Hz, 1H), 6.49 (d,  $J$  = 8.0 Hz, 1H), 6.10 (d,  $J$  = 8.0 Hz, 1H), 2.94-2.83 (m, 1H), 2.55-2.45 (m, 1H), 2.27-2.19 (m, 4H), 2.19-2.14 (m, 1H), 2.12 (s, 3H), 2.01-1.93 (m, 5H), 1.86-1.71 (m, 2H), 1.58-1.50 (m, 1H), 1.49-1.40 (m, 1H), 1.38-1.32 (m, 1H), 1.31-1.25 (m, 1H), 1.05-0.93 (m, 1H).  **$^{13}\text{C NMR}$**  (125 MHz,  $\text{C}_6\text{D}_6$ , ppm):  $\delta$  220.1, 218.6, 151.2, 133.1, 130.9, 128.3, 121.8, 103.9, 82.5, 58.5, 54.5, 40.1, 37.9, 29.4, 26.8, 26.4, 21.3, 20.3, 19.9, 17.9. **HRMS (ESI)** calcd for  $[\text{M}+\text{Na}]^+$   $\text{C}_{20}\text{H}_{25}\text{NNaO}_2$ ,  $m/z$ : 334.1777, found: 334.1775.

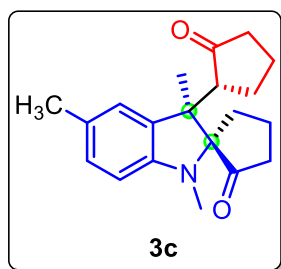

General procedure A was followed using **1c** (22.9 mg, 0.1 mmol) stirred for 8 h at rt. The crude mixture was purified by silica gel flash chromatography (petroleum ether/ethyl ether = 3:1) to afford the desired product as a mixture of two diastereoisomers (25.8 mg, 83% yield, 7.0:1 dr). The major isomer **3c** was a white amorphous solid after further column chromatography.

$R_f$  = 0.45 (petroleum ether/ethyl acetate = 5:1).  $^1\text{H NMR}$  (400 MHz,  $\text{CDCl}_3$ , ppm):  $\delta$  6.89 (d,  $J$  = 7.6 Hz, 1H), 6.76 (s, 1H), 6.22 (d,  $J$  = 8.0 Hz, 1H), 2.65-2.55 (m, 1H), 2.54-2.43 (m, 4H), 2.27 (s, 3H), 2.25-2.19 (m, 1H), 2.18-2.10 (m, 2H), 2.10-2.01 (m, 3H), 1.96-1.87 (m, 2H), 1.87-1.79 (m, 4H), 1.44-1.34 (m, 1H), 1.31-1.22 (m, 1H).  $^{13}\text{C NMR}$  (100 MHz,  $\text{CDCl}_3$ , ppm):  $\delta$  221.0, 219.6, 148.2, 134.6, 128.3, 126.9, 122.5, 105.0, 83.1, 61.2, 52.5, 39.8, 37.7, 29.6, 26.2, 20.9, 19.9, 19.7, 17.2. **HRMS (ESI)** calcd for  $[\text{M}+\text{Na}]^+$   $\text{C}_{20}\text{H}_{25}\text{NNaO}_2$ ,  $m/z$ : 334.1777, found: 334.1780.

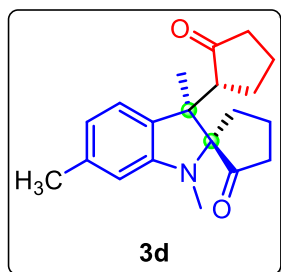

General procedure A was followed using **1d** (22.9 mg, 0.1 mmol) stirred for 8 h at rt. The crude mixture was purified by silica gel flash chromatography (petroleum ether/ethyl ether = 3:1) to afford the desired product as a mixture of two diastereoisomers (23.3 mg, 75% yield, 7.3:1 dr). The major isomer **3d** was a white amorphous solid after further column chromatography.

$R_f$  = 0.45 (petroleum ether/ethyl acetate = 5:1).  $^1\text{H NMR}$  (400 MHz,  $\text{CDCl}_3$ , ppm):  $\delta$  6.88 (d,  $J$  = 8.0 Hz, 1H), 6.70 (d,  $J$  = 0.8 Hz, 1H), 6.23 (d,  $J$  = 8.0 Hz, 1H), 3.31 (dd,  $J$  = 12.0, 8.0 Hz, 1H), 3.01-2.91 (m, 1H), 2.50 (s, 3H), 2.32-2.26 (m, 1H), 2.25 (s, 3H), 2.19-2.10 (m, 2H), 2.05-1.93 (m, 3H), 1.89-1.82 (m, 2H), 1.67-1.59 (m, 2H), 1.54-1.49 (m, 1H), 1.39 (s, 2H).  $^{13}\text{C NMR}$  (100 MHz,  $\text{CDCl}_3$ , ppm):  $\delta$  220.0,

218.6, 148.2, 133.5, 128.2, 126.5, 124.1, 105.6, 84.4, 51.1, 49.9, 39.5, 37.5, 30.2, 28.0, 24.3, 20.9, 19.5, 17.5, 13.9. **HRMS (ESI)** calcd for  $[M+Na]^+$   $C_{20}H_{25}NNaO_2$ ,  $m/z$ : 334.1777, found: 334.1774.

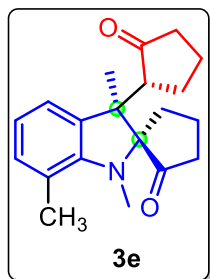

General procedure A was followed using **1e** (22.9 mg, 0.1 mmol) stirred for 8 h at rt. The crude mixture was purified by silica gel flash chromatography (petroleum ether/ethyl ether = 3:1) to afford the desired product as a mixture of two diastereoisomers (20.2 mg, 65% yield, 11.7:1 dr). The major isomer **3e** was a white amorphous solid after further column chromatography.

$R_f$  = 0.45 (petroleum ether/ethyl acetate = 5:1). **<sup>1</sup>H NMR** (400 MHz,  $CDCl_3$ , ppm):  $\delta$  6.86 (dd,  $J$  = 7.2, 1.2 Hz, 1H), 6.82 (d,  $J$  = 7.6 Hz, 1H), 6.63 (t,  $J$  = 7.6 Hz, 1H), 2.84 (s, 3H), 2.64-2.52 (m, 1H), 2.51-2.42 (m, 1H), 2.41 (s, 3H), 2.29-2.21 (m, 1H), 2.21-1.98 (m, 6H), 1.98-1.82 (m, 2H), 1.81 (s, 3H), 1.46-1.35 (m, 1H), 1.28-1.20 (m, 1H). **<sup>13</sup>C NMR** (100 MHz,  $CDCl_3$ , ppm):  $\delta$  220.8, 219.4, 148.0, 135.5, 131.8, 120.0, 118.3, 117.7, 82.9, 61.3, 51.7, 39.8, 37.6, 33.5, 26.5, 20.1, 20.0, 19.7, 17.3. **HRMS (ESI)** calcd for  $[M+Na]^+$   $C_{20}H_{25}NNaO_2$ ,  $m/z$ : 334.1777, found: 334.1780.

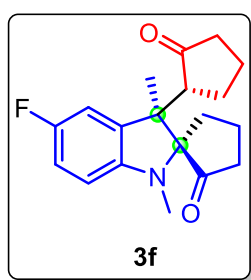

General procedure A was followed using **1f** (23.3 mg, 0.1 mmol) stirred for 8 h at rt. The crude mixture was purified by silica gel flash chromatography (petroleum ether/ethyl ether = 3:1) to afford the desired product as a mixture of two diastereoisomers (26.1 mg, 83% yield, 8.2:1 dr). The major isomer **3f** was a white amorphous solid after further column chromatography.

$R_f$  = 0.45 (petroleum ether/ethyl acetate = 5:1). **<sup>1</sup>H NMR** (400 MHz,  $CDCl_3$ , ppm):  $\delta$  6.82-6.67 (m, 2H), 6.17 (dd,  $J$  = 8.4, 4.0 Hz, 1H), 2.62-2.41 (m, 5H), 2.27-2.15 (m, 2H), 2.15-2.01 (m, 4H), 1.97-1.88 (m,

2H), 1.88-1.81 (m, 1H), 1.80 (s, 3H), 1.49-1.36 (m, 1H), 1.36-1.23 (m, 1H).  $^{13}\text{C}$  NMR (100 MHz,  $\text{CDCl}_3$ , ppm):  $\delta$  220.3, 219.0, 156.7 (d,  $J = 234.4$  Hz), 146.4, 136.1 (d,  $J = 7.2$  Hz), 113.6 (d,  $J = 22.9$  Hz), 109.8 (d,  $J = 24.7$  Hz), 105.0 (d,  $J = 8.0$  Hz), 83.1, 60.6, 52.2, 39.7, 37.6, 29.8, 26.4, 26.2, 19.9, 19.6, 17.1.  $^{19}\text{F}$  NMR (376 MHz,  $\text{CDCl}_3$ , ppm):  $\delta$  -127.3. HRMS (ESI) calcd for  $[\text{M}+\text{Na}]^+$   $\text{C}_{19}\text{H}_{22}\text{FNNaO}_2$ ,  $m/z$ : 338.1527, found: 338.1533

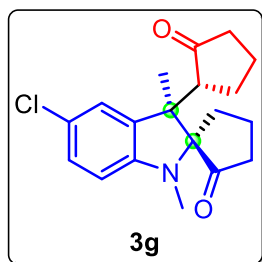

General procedure A was followed using **1g** (24.9 mg, 0.1 mmol) stirred for 8 h at rt. The crude mixture was purified by silica gel flash chromatography (petroleum ether/ethyl ether = 3:1) to afford the desired product as a mixture of two diastereoisomers (26.1 mg, 79% yield, 12.2:1 dr). The major isomer **3g** was a white amorphous solid after further column chromatography.

$R_f = 0.45$  (petroleum ether/ethyl acetate = 5:1).  $^1\text{H}$  NMR (400 MHz,  $\text{CDCl}_3$ , ppm):  $\delta$  7.02 (dd,  $J = 8.4$ , 2.0 Hz, 1H), 6.89 (d,  $J = 2.4$  Hz, 1H), 6.20 (d,  $J = 8.4$  Hz, 1H), 2.60-2.41 (m, 5H), 2.28-2.10 (m, 3H), 2.10-2.01 (m, 3H), 1.96-1.83 (m, 3H), 1.81 (s, 3H), 1.49-1.36 (m, 1H), 1.36-1.23 (m, 1H).  $^{13}\text{C}$  NMR (100 MHz,  $\text{CDCl}_3$ , ppm):  $\delta$  220.1, 219.0, 148.8, 136.3, 127.8, 122.1, 105.9, 83.0, 60.8, 52.3, 39.6, 37.6, 29.4, 26.7, 26.1, 19.9, 19.6, 17.2. HRMS (ESI) calcd for  $[\text{M}+\text{Na}]^+$   $\text{C}_{19}\text{H}_{22}\text{ClNaO}_2$ ,  $m/z$ : 354.1231, found: 354.1236.

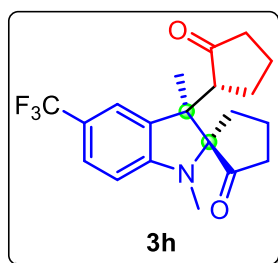

General procedure A was followed using **1h** (28.3 mg, 0.1 mmol) stirred for 12 h at rt. The crude mixture was purified by silica gel flash chromatography (petroleum ether/ethyl ether = 3:1) to afford the desired



product as a mixture of two diastereoisomers (24.5 mg, 67% yield, 9.8:1 dr). The major isomer **3h** was a colorless crystal after further column chromatography.

$R_f$  = 0.40 (petroleum ether/ethyl acetate = 5:1). **mp**: 107-108 °C.  **$^1\text{H NMR}$**  (400 MHz,  $\text{CDCl}_3$ , ppm):  $\delta$  7.34 (ddd,  $J$  = 8.4, 2.0, 0.8 Hz, 1H), 7.12 (d,  $J$  = 1.6 Hz, 1H), 6.30 (d,  $J$  = 8.0 Hz, 1H), 2.58 (s, 3H), 2.55-2.41 (m, 2H), 2.30-2.22 (m, 1H), 2.22-2.00 (m, 5H), 1.98-1.78 (m, 6H), 1.49-1.36 (m, 1H), 1.30-1.20 (m, 1H).  **$^{13}\text{C NMR}$**  (100 MHz,  $\text{CDCl}_3$ , ppm):  $\delta$  219.9, 219.0, 125.1 (q,  $J$  = 269.0 Hz), 152.6, 134.7, 126.3 (q,  $J$  = 4.0 Hz), 119.3 (q,  $J$  = 32.2 Hz), 118.7 (q,  $J$  = 3.6 Hz), 104.1, 83.0, 60.9, 52.2, 39.6, 37.6, 29.1, 27.4, 26.0, 19.8, 19.6, 17.2.  **$^{19}\text{F NMR}$**  (376 MHz,  $\text{CDCl}_3$ , ppm):  $\delta$  -60.4. **HRMS (ESI)** calcd for  $[\text{M}+\text{Na}]^+$   $\text{C}_{20}\text{H}_{22}\text{F}_3\text{NNaO}_2$ ,  $m/z$ : 388.1495, found: 388.1497.

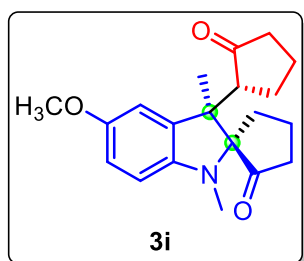

General procedure A was followed using **1i** (24.5 mg, 0.1 mmol) stirred for 8 h at rt. The crude mixture was purified by silica gel flash chromatography (petroleum ether/ethyl ether = 3:1) to afford the desired product as a mixture of two diastereoisomers (28.1 mg, 86% yield, 4.9:1 dr). The major isomer **3i** was a white amorphous solid after further column chromatography.

$R_f$  = 0.45 (petroleum ether/ethyl acetate = 5:1).  **$^1\text{H NMR}$**  (400 MHz,  $\text{CDCl}_3$ , ppm):  $\delta$  6.67-6.59 (m, 2H), 6.21 (d,  $J$  = 8.4 Hz, 1H), 3.75 (s, 3H), 2.65-2.53 (m, 1H), 2.52-2.42 (m, 4H), 2.24-2.02 (m, 6H), 1.97-1.83 (m, 3H), 1.81 (s, 3H), 1.46-1.34 (m, 1H), 1.33-1.24 (m, 1H).  **$^{13}\text{C NMR}$**  (100 MHz,  $\text{CDCl}_3$ , ppm):  $\delta$  220.7, 219.3, 152.9, 144.7, 136.1, 111.6, 110.0, 105.1, 83.1, 60.9, 56.0, 52.4, 39.7, 37.6, 29.9, 26.3, 26.1, 19.9, 19.7, 17.1. **HRMS (ESI)** calcd for  $[\text{M}+\text{Na}]^+$   $\text{C}_{20}\text{H}_{25}\text{NNaO}_3$ ,  $m/z$ : 350.1727, found: 350.1724.

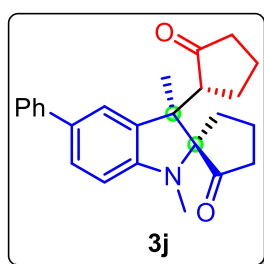

General procedure A was followed using **1j** (29.1 mg, 0.1 mmol) stirred for 8 h at rt. The crude mixture was purified by silica gel flash chromatography (petroleum ether/ethyl ether = 3:1) to afford the desired product as a mixture of two diastereoisomers (29.8 mg, 80% yield, 11.2:1 dr). The major isomer **3j** was a white amorphous solid after further column chromatography.

$R_f = 0.45$  (petroleum ether/ethyl acetate = 5:1).  $^1\text{H NMR}$  (500 MHz,  $\text{CDCl}_3$ , ppm):  $\delta$  7.55 (dd,  $J = 8.0, 1.0$  Hz, 2H), 7.42-7.35 (m, 3H), 7.28-7.23 (m, 1H), 7.20 (d,  $J = 2.0$  Hz, 1H), 6.38 (d,  $J = 8.0$  Hz, 1H), 2.64-2.45 (m, 5H), 2.34-2.27 (m, 1H), 2.24-2.04 (m, 5H), 1.98-1.90 (m, 5H), 1.88-1.79 (m, 1H), 1.45-1.28 (m, 2H).  $^{13}\text{C NMR}$  (125 MHz,  $\text{CDCl}_3$ , ppm):  $\delta$  220.7, 219.5, 149.8, 141.5, 135.1, 130.9, 128.6, 127.0, 126.2, 126.0, 120.5, 105.3, 83.1, 61.3, 52.5, 39.8, 37.7, 29.4, 26.8, 26.2, 19.9, 19.8, 17.2. **HRMS (ESI)** calcd for  $[\text{M}+\text{H}]^+$   $\text{C}_{25}\text{H}_{28}\text{NO}_2$ ,  $m/z$ : 374.2115, found: 374.2115.

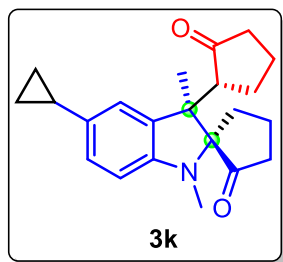

General procedure A was followed using **1k** (25.5 mg, 0.1 mmol) stirred for 8 h at rt. The crude mixture was purified by silica gel flash chromatography (petroleum ether/ethyl ether = 3:1) to afford the desired product as a mixture of two diastereoisomers (29.0 mg, 86% yield, 6.9:1 dr). The major isomer **3k** was a white amorphous solid after further column chromatography.

$R_f = 0.45$  (petroleum ether/ethyl acetate = 5:1).  $^1\text{H NMR}$  (500 MHz,  $\text{C}_6\text{D}_6$ , ppm):  $\delta$  6.88 (dd,  $J = 8.0, 2.0$  Hz, 1H), 6.75 (d,  $J = 1.5$  Hz, 1H), 6.15 (d,  $J = 8.0$  Hz, 1H), 2.84 (qd,  $J = 13.0, 7.0$  Hz, 1H), 2.52-2.43 (m, 1H), 2.23 (s, 3H), 2.21-2.12 (m, 1H), 1.94 (dd,  $J = 17.5, 8.5$  Hz, 1H), 1.87-1.79 (m, 6H), 1.78-1.69 (m, 2H), 1.55-1.47 (m, 1H), 1.46-1.37 (m, 1H), 1.35-1.29 (m, 1H), 1.29-1.22 (m, 1H), 1.01-0.89 (m, 1H), 0.80-0.74 (m, 2H), 0.67-0.62 (m, 2H).  $^{13}\text{C NMR}$  (125 MHz,  $\text{C}_6\text{D}_6$ , ppm):  $\delta$  219.5, 218.1, 149.1, 135.2, 133.2, 125.9, 120.2, 105.4, 83.2, 61.2, 52.7, 39.8, 37.7, 29.5, 26.5, 20.1, 20.0, 17.5, 15.8, 8.6, 8.5.

**HRMS (ESI)** calcd for  $[\text{M}+\text{Na}]^+$   $\text{C}_{22}\text{H}_{27}\text{NNaO}_2$ ,  $m/z$ : 360.1934, found: 360.1932.

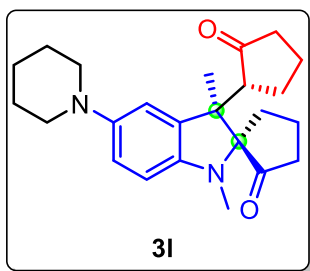

General procedure A was followed using **11** (29.8 mg, 0.1 mmol) stirred for 8 h at rt. The crude mixture was purified by silica gel flash chromatography (petroleum ether/ethyl acetate = 1:1) to afford the desired product as a mixture of two diastereoisomers (20.1 mg, 53% yield, 6.5:1 dr). The major isomer **31** was a yellow amorphous solid after further column chromatography.

$R_f$  = 0.34 (petroleum ether/ethyl acetate = 1:1).  $^1\text{H NMR}$  (500 MHz,  $\text{CDCl}_3$ , ppm):  $\delta$  6.80-6.65 (m, 2H), 6.21 (d,  $J$  = 8.5 Hz, 1H), 3.05-2.89 (m, 4H), 2.58 (qd,  $J$  = 12.5, 6.0 Hz, 1H), 2.53-2.43 (m, 4H), 2.22-2.16 (m, 1H), 2.16-2.12 (m, 1H), 2.12-2.09 (m, 1H), 2.09-2.00 (m, 3H), 1.95-1.87 (m, 2H), 1.86-1.79 (m, 4H), 1.76-1.69 (m, 4H), 1.57-1.49 (m, 2H), 1.40-1.31 (m, 1H), 1.31-1.23 (m, 1H).  $^{13}\text{C NMR}$  (125 MHz,  $\text{CDCl}_3$ , ppm):  $\delta$  221.1, 219.7, 145.8, 145.1, 135.5, 116.5, 114.5, 105.0, 83.1, 61.1, 53.3, 52.6, 39.8, 37.6, 29.8, 26.4, 26.3, 26.2, 24.1, 19.9, 19.7, 17.1. **HRMS (ESI)** calcd for  $[\text{M}+\text{H}]^+$   $\text{C}_{24}\text{H}_{33}\text{N}_2\text{O}_2$ ,  $m/z$ : 381.2537, found: 381.2545.

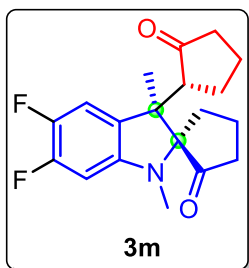

General procedure A was followed using **1m** (25.1 mg, 0.1 mmol) stirred for 8 h at rt. The crude mixture was purified by silica gel flash chromatography (petroleum ether/ethyl ether = 3:1) to afford the desired product as a mixture of two diastereoisomers (25.6 mg, 77% yield, 8.0:1 dr). The major isomer **3m** was a yellow amorphous solid after further column chromatography.

$R_f$  = 0.40 (petroleum ether/ethyl acetate = 5:1).  $^1\text{H NMR}$  (500 MHz,  $\text{CDCl}_3$ , ppm):  $\delta$  6.81 (t,  $J$  = 9.0 Hz, 1H), 6.06 (dd,  $J$  = 11.0, 6.5 Hz, 1H), 2.54-2.43 (m, 5H), 2.26-2.15 (m, 2H), 2.14-2.01 (m, 4H), 1.98-1.82 (m, 3H), 1.76 (s, 3H), 1.48-1.37 (m, 1H), 1.36-1.27 (m, 1H).  $^{13}\text{C NMR}$  (125 MHz,  $\text{CDCl}_3$ , ppm):  $\delta$  219.8, 218.9, 151.3 (d,  $J$  = 13.8 Hz), 149.4 (d,  $J$  = 13.6 Hz), 146.5 (d,  $J$  = 9.3 Hz), 144.3 (d,  $J$  = 13.5 Hz), 142.4

(d,  $J = 13.6$  Hz), 129.7, 111.2 (d,  $J = 19.9$  Hz), 94.5 (d,  $J = 22.6$  Hz), 82.9, 60.6, 51.8, 39.6, 37.6, 29.7, 26.7, 26.2, 19.9, 19.6, 17.1.  $^{19}\text{F}$  NMR (471 MHz,  $\text{CDCl}_3$ , ppm):  $\delta$  -139.4, -139.4, -152.6, -152.6. HRMS (ESI) calcd for  $[\text{M}+\text{Na}]^+$   $\text{C}_{19}\text{H}_{21}\text{F}_2\text{NNaO}_2$ ,  $m/z$ : 356.1433, found: 356.1434.

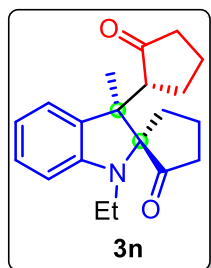

General procedure A was followed using **1n** (22.9 mg, 0.1 mmol) stirred for 8 h at rt. The crude mixture was purified by silica gel flash chromatography (petroleum ether/ethyl ether = 3:1) to afford the desired product as a mixture of two diastereoisomers (21.8 mg, 70% yield, 3.3:1 dr). The major isomer **3n** was a white amorphous solid after further column chromatography.

$R_f = 0.45$  (petroleum ether/ethyl acetate = 5:1).  $^1\text{H}$  NMR (500 MHz,  $\text{CDCl}_3$ , ppm):  $\delta$  7.07 (t,  $J = 7.5$  Hz, 1H), 6.92 (d,  $J = 7.0$  Hz, 1H), 6.67 (t,  $J = 7.5$  Hz, 1H), 6.32 (d,  $J = 8.0$  Hz, 1H), 3.05-2.94 (m, 1H), 2.80-2.64 (m, 2H), 2.52-2.42 (m, 1H), 2.31 (dd,  $J = 14.0, 6.5$  Hz, 1H), 2.20-2.08 (m, 3H), 2.08-2.00 (m, 2H), 1.96-1.71 (m, 6H), 1.45-1.31 (m, 1H), 1.31-1.16 (m, 4H).  $^{13}\text{C}$  NMR (125 MHz,  $\text{CDCl}_3$ , ppm):  $\delta$  221.2, 219.6, 149.3, 134.3, 128.0, 121.6, 116.9, 104.7, 83.4, 61.6, 52.5, 39.8, 39.6, 37.6, 28.8, 26.0, 20.0, 19.6, 17.2, 13.7. HRMS (ESI) calcd for  $[\text{M}+\text{Na}]^+$   $\text{C}_{20}\text{H}_{25}\text{NNaO}_2$ ,  $m/z$ : 334.1777, found: 334.1782.

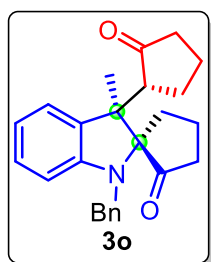

General procedure A was followed using **1o** (29.1 mg, 0.1 mmol) stirred for 8 h at rt. The crude mixture was purified by silica gel flash chromatography (petroleum ether/ethyl ether = 3:1) to afford the desired product as a mixture of two diastereoisomers (25.0 mg, 67% yield, 9.2:1 dr). The major isomer **3o** was a white amorphous solid after further column chromatography.

$R_f = 0.45$  (petroleum ether/ethyl acetate = 5:1).  $^1\text{H}$  NMR (400 MHz,  $\text{CDCl}_3$ , ppm):  $\delta$  7.48 (d,  $J = 7.6$  Hz,

2H), 7.32 (t,  $J = 7.6$  Hz, 2H), 7.27-7.23 (m, 1H), 6.96 (d,  $J = 7.6$  Hz, 1H), 6.91 (t,  $J = 7.6$  Hz, 1H), 6.69 (t,  $J = 7.2$  Hz, 1H), 6.10 (d,  $J = 7.6$  Hz, 1H), 4.05 (d,  $J = 15.2$  Hz, 1H), 3.96 (d,  $J = 15.2$  Hz, 1H), 2.89-2.75 (m, 1H), 2.56-2.37 (m, 2H), 2.29-2.05 (m, 5H), 2.02-1.87 (m, 6H), 1.51-1.39 (m, 1H), 1.38-1.29 (m, 1H).  $^{13}\text{C}$  NMR (100 MHz,  $\text{CDCl}_3$ , ppm):  $\delta$  221.0, 219.4, 149.9, 138.6, 134.8, 128.4, 127.8, 127.4, 127.0, 121.6, 118.2, 107.3, 83.6, 61.4, 52.6, 50.7, 39.8, 37.9, 28.7, 26.4, 20.4, 20.0, 17.4. **HRMS (ESI)** calcd for  $[\text{M}+\text{H}]^+$   $\text{C}_{25}\text{H}_{28}\text{NO}_2$ ,  $m/z$ : 374.2115, found: 374.2110.

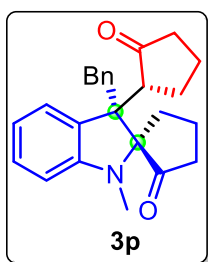

General procedure A was followed using **1p** (29.1 mg, 0.1 mmol) stirred for 8 h at rt. The crude mixture was purified by silica gel flash chromatography (petroleum ether/ethyl ether = 3:1) to afford the desired product as a mixture of two diastereoisomers (21.6 mg, 58% yield, 7.0:1 dr). The major isomer **3p** was a white amorphous solid after further column chromatography.

$R_f = 0.45$  (petroleum ether/ethyl acetate = 5:1).  $^1\text{H}$  NMR (400 MHz,  $\text{CDCl}_3$ , ppm):  $\delta$  7.29-7.22 (m, 3H), 7.20-7.14 (m, 2H), 7.06 (t,  $J = 7.2$  Hz, 1H), 6.44 (t,  $J = 7.6$  Hz, 1H), 6.37 (d,  $J = 8.0$  Hz, 1H), 6.15 (d,  $J = 6.8$  Hz, 1H), 3.97 (d,  $J = 12.8$  Hz, 1H), 3.01 (d,  $J = 12.8$  Hz, 1H), 2.67-2.61 (m, 1H), 2.60 (s, 3H), 2.48-2.38 (m, 2H), 2.38-2.30 (m, 1H), 2.28-2.14 (m, 2H), 2.12-1.96 (m, 3H), 1.94-1.82 (m, 2H), 1.60-1.46 (m, 2H).  $^{13}\text{C}$  NMR (100 MHz,  $\text{CDCl}_3$ , ppm):  $\delta$  219.2, 217.6, 151.0, 137.5, 132.0, 131.9, 128.2, 127.8, 126.7, 125.0, 117.0, 106.0, 81.7, 56.5, 54.5, 40.2, 38.5, 38.3, 29.9, 28.9, 26.4, 19.9, 17.6. **HRMS (ESI)** calcd for  $[\text{M}+\text{Na}]^+$   $\text{C}_{25}\text{H}_{27}\text{NNaO}_2$ ,  $m/z$ : 396.1934, found: 396.1934.

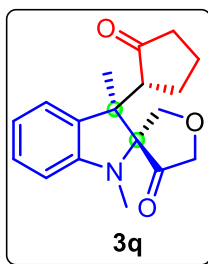

General procedure A was followed using **1q** (21.7 mg, 0.1 mmol) stirred for 8 h at rt. The crude mixture was purified by silica gel flash chromatography (petroleum ether/ethyl ether = 3:1) to afford the desired product as a mixture of two diastereoisomers (23.3 mg, 78% yield, 13.0:1 dr). The major isomer **3q** was a white amorphous solid after further column chromatography.

$R_f$  = 0.45 (petroleum ether/ethyl acetate = 5:1).  $^1\text{H NMR}$  (500 MHz,  $\text{C}_6\text{D}_6$ , ppm):  $\delta$  7.07 (t,  $J$  = 7.5 Hz, 1H), 6.85 (d,  $J$  = 7.0 Hz, 1H), 6.75 (t,  $J$  = 7.5 Hz, 1H), 6.14 (d,  $J$  = 8.0 Hz, 1H), 4.27-4.20 (m, 1H), 3.98 (d,  $J$  = 10.5 Hz, 1H), 3.48-3.41 (m, 2H), 2.55-2.43 (m, 1H), 2.25 (s, 3H), 2.05-1.90 (m, 2H), 1.88 (s, 3H), 1.87-1.82 (m, 1H), 1.50-1.41 (m, 1H), 1.25-1.18 (m, 1H), 0.99-0.89 (m, 1H).  $^{13}\text{C NMR}$  (125 MHz,  $\text{C}_6\text{D}_6$ , ppm):  $\delta$  217.7, 216.3, 150.3, 134.9, 128.5, 128.1, 122.3, 118.8, 105.7, 80.2, 72.4, 68.1, 60.9, 52.1, 39.5, 29.5, 26.5, 20.0, 19.9. **HRMS (ESI)** calcd for  $[\text{M}+\text{Na}]^+$   $\text{C}_{18}\text{H}_{21}\text{NNaO}_3$ ,  $m/z$ : 322.1414, found: 322.1407.

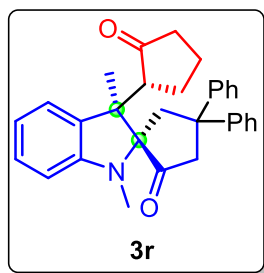

General procedure A was followed using **1r** (36.7 mg, 0.1 mmol) stirred for 8 h at rt. The crude mixture was purified by silica gel flash chromatography (petroleum ether/ethyl ether = 2:1) to afford the desired product as a mixture of two diastereoisomers (22.4 mg, 50% yield, 8.2:1 dr). The major isomer **3r** was a white amorphous solid after further column chromatography.

$R_f$  = 0.45 (petroleum ether/ethyl acetate = 5:1).  $^1\text{H NMR}$  (400 MHz,  $\text{CDCl}_3$ , ppm):  $\delta$  7.31-7.27 (m, 4H), 7.25-7.22 (m, 4H), 7.21-7.15 (m, 1H), 7.15-7.10 (m, 1H), 7.07 (td,  $J$  = 7.6, 1.2 Hz, 1H), 6.90 (dd,  $J$  = 7.2, 1.2 Hz, 1H), 6.69 (td,  $J$  = 7.6, 1.2 Hz, 1H), 6.20 (d,  $J$  = 8.0 Hz, 1H), 3.64 (d,  $J$  = 15.2 Hz, 1H), 3.48 (dd,  $J$  = 16.0, 2.4 Hz, 1H), 3.24 (d,  $J$  = 16.4 Hz, 1H), 2.70-2.54 (m, 2H), 2.20-2.08 (m, 3H), 1.86 (s, 3H), 1.85 (s, 3H), 1.83-1.79 (m, 1H), 1.42-1.32 (m, 1H), 1.26-1.18 (m, 1H).  $^{13}\text{C NMR}$  (100 MHz,  $\text{CDCl}_3$ , ppm):  $\delta$  219.2, 215.9, 150.1, 148.7, 147.6, 135.0, 128.6, 128.6, 128.2, 127.1, 126.5, 126.4, 126.3, 121.3, 117.9, 105.7, 82.9, 62.6, 53.0, 51.7, 47.0, 41.4, 39.5, 28.9, 26.33, 22.5, 20.0. **HRMS (ESI)** calcd for  $[\text{M}+\text{Na}]^+$   $\text{C}_{31}\text{H}_{31}\text{NNaO}_2$ ,  $m/z$ : 472.2247, found: 472.2246.

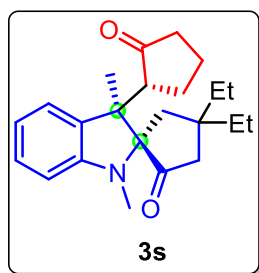

General procedure A was followed using **1s** (27.1 mg, 0.1 mmol) stirred for 8 h at rt. The crude mixture was purified by silica gel flash chromatography (petroleum ether/ethyl ether = 2:1) to afford the desired product as a mixture of two diastereoisomers (19.8 mg, 56% yield, 6.4:1 dr). The major isomer **3s** was an light yellow amorphous solid after further column chromatography.

$R_f$  = 0.45 (petroleum ether/ethyl acetate = 5:1). **<sup>1</sup>H NMR** (400 MHz, CDCl<sub>3</sub>, ppm): δ 7.08 (td,  $J$  = 7.6, 1.2 Hz, 1H), 6.89 (dd,  $J$  = 7.2, 1.2 Hz, 1H), 6.68 (td,  $J$  = 7.2, 1.2 Hz, 1H), 6.30 (d,  $J$  = 8.0 Hz, 1H), 2.67 (qd,  $J$  = 12.4, 6.4 Hz, 1H), 2.60-2.52 (m, 4H), 2.25 (d,  $J$  = 15.6 Hz, 1H), 2.16-2.12 (m, 2H), 2.12-2.04 (m, 2H), 1.90 (s, 3H), 1.87-1.76 (m, 1H), 1.69-1.61 (m, 1H), 1.59-1.52 (m, 2H), 1.39-1.29 (m, 2H), 1.29-1.20 (m, 2H), 0.82 (t,  $J$  = 7.4 Hz, 3H), 0.78 (t,  $J$  = 7.4 Hz, 3H). **<sup>13</sup>C NMR** (100 MHz, CDCl<sub>3</sub>, ppm): δ 219.0, 217.7, 150.3, 135.0, 128.1, 121.3, 117.8, 105.4, 84.1, 62.2, 52.4, 51.4, 39.7, 36.8, 35.7, 31.0, 30.8, 29.1, 26.4, 21.8, 20.1, 8.5, 7.8. **HRMS (ESI)** calcd for [M+Na]<sup>+</sup> C<sub>23</sub>H<sub>31</sub>NNaO<sub>2</sub>, m/z: 376.2247, found: 376.2245.

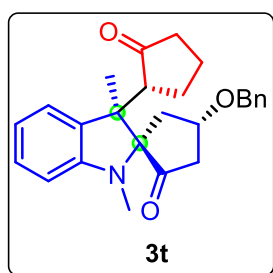

General procedure A was followed using **1t** (32.1 mg, 0.1 mmol) stirred for 8 h at rt. The crude mixture was purified by silica gel flash chromatography (petroleum ether/ethyl ether = 2:1) to afford the desired product as a mixture of two diastereoisomers (26.6 mg, 66% yield, 8.2:1 dr). The major isomer **3t** was a white amorphous solid after further column chromatography.

$R_f$  = 0.45 (petroleum ether/ethyl acetate = 5:1). **<sup>1</sup>H NMR** (400 MHz, CDCl<sub>3</sub>, ppm): δ 7.39-7.24 (m, 5H), 7.18 (d,  $J$  = 7.2 Hz, 1H), 7.08 (t,  $J$  = 7.6 Hz, 1H), 6.72 (t,  $J$  = 7.2 Hz, 1H), 6.30 (d,  $J$  = 7.6 Hz, 1H), 4.55 (s, 2H), 4.32-4.21 (m, 1H), 2.71-2.58 (m, 3H), 2.54 (s, 3H), 2.47-2.31 (m, 3H), 2.31-2.19 (m, 1H), 2.18-

2.04 (m, 1H), 1.95-1.84 (m, 1H), 1.69 (s, 3H), 1.55-1.44 (m, 2H).  $^{13}\text{C}$  NMR (100 MHz,  $\text{CDCl}_3$ , ppm):  $\delta$  218.6, 216.1, 149.2, 137.8, 136.0, 128.5, 127.9, 127.8, 127.6, 122.6, 118.5, 105.8, 83.2, 72.3, 71.0, 59.9, 51.3, 47.0, 39.3, 35.6, 30.0, 26.9, 21.7, 20.2. **HRMS (ESI)** calcd for  $[\text{M}+\text{H}]^+$   $\text{C}_{26}\text{H}_{30}\text{NO}_3$ ,  $m/z$ : 404.2220, found: 404.2214.

Note: based on our previous experimental results<sup>2,3</sup>, we speculated that the relative configuration of **3t** was as follows:

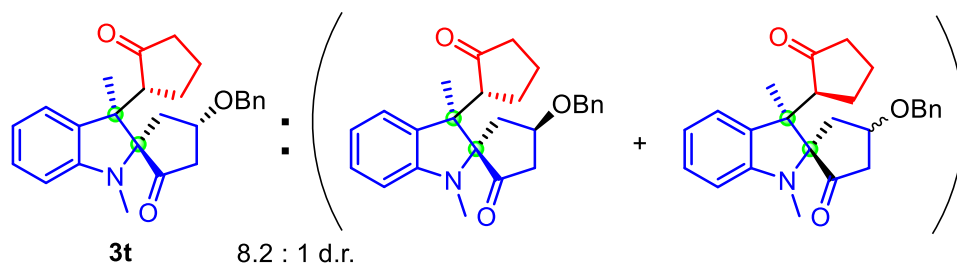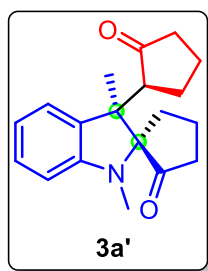

General procedure B was followed using **1a** (21.5 mg, 0.1 mmol) stirred for 8 h at rt. The crude mixture was purified by silica gel flash chromatography (petroleum ether/ethyl ether = 3:1) to afford the desired product as a mixture of two diastereoisomers (16.0 mg, 54% yield, 6.8:1 dr). The major isomer **3a'** was a colorless syrupy liquid after further column chromatography.

$R_f$  = 0.37 (petroleum ether/ethyl acetate = 5:1).  $^1\text{H}$  NMR (400 MHz,  $\text{CDCl}_3$ , ppm):  $\delta$  7.06 (t,  $J$  = 7.6 Hz, 1H), 6.87 (d,  $J$  = 7.2 Hz, 1H), 6.64 (t,  $J$  = 7.2 Hz, 1H), 6.31 (d,  $J$  = 7.6 Hz, 1H), 3.36-3.25 (m, 1H), 3.02-2.89 (m, 1H), 2.52 (s, 3H), 2.32-2.06 (m, 3H), 2.05-1.89 (m, 3H), 1.89-1.79 (m, 2H), 1.66-1.54 (m, 2H), 1.53-1.46 (m, 1H), 1.39 (s, 3H).  $^{13}\text{C}$  NMR (100 MHz,  $\text{CDCl}_3$ , ppm):  $\delta$  219.8, 218.3, 150.1, 133.1, 127.9, 123.1, 117.1, 105.6, 84.1, 51.0, 49.9, 39.3, 37.4, 29.8, 27.8, 24.6, 19.4, 17.4, 13.8. **HRMS (ESI)** calcd for  $[\text{M}+\text{Na}]^+$   $\text{C}_{19}\text{H}_{23}\text{NNaO}_2$ ,  $m/z$ : 320.1621, found: 320.1622.



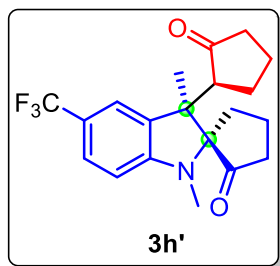

General procedure B was followed using **1h** (28.3 mg, 0.1 mmol) stirred for 8 h at rt. The crude mixture was purified by silica gel flash chromatography (petroleum ether/ethyl ether = 3:1) to afford the desired product as a mixture of two diastereoisomers (17.2 mg, 47% yield, 5.0:1 dr). The major isomer **3h'** was a colorless crystal after further column chromatography.

$R_f$  = 0.32 (petroleum ether/ethyl acetate = 5:1). **mp**: 118-120 °C.  **$^1\text{H NMR}$**  (400 MHz,  $\text{CDCl}_3$ , ppm):  $\delta$  7.35-7.30 (m, 1H), 7.06 (d,  $J$  = 1.6 Hz, 1H), 6.31 (d,  $J$  = 8.4 Hz, 1H), 3.77 (q,  $J$  = 8.4 Hz, 1H), 3.34-3.24 (m, 1H), 3.02-2.92 (m, 1H), 2.57 (s, 3H), 2.34-2.20 (m, 2H), 2.19-2.08 (m, 1H), 2.06-1.94 (m, 3H), 1.93-1.79 (m, 2H), 1.65-1.60 (m, 1H), 1.56-1.48 (m, 1H), 1.42 (s, 3H).  **$^{13}\text{C NMR}$**  (100 MHz,  $\text{CDCl}_3$ , ppm):  $\delta$  219.6, 217.5, 152.6, 133.5, 126.2 (q,  $J$  = 4.0 Hz), 125.1 (q,  $J$  = 269.0 Hz), 120.2 (q,  $J$  = 3.6 Hz), 118.9 (q,  $J$  = 32.3 Hz), 104.6, 84.1, 50.8, 49.9, 39.4, 37.5, 29.6, 27.7, 25.6, 19.5, 17.6, 13.9.  **$^{19}\text{F NMR}$**  (376 MHz,  $\text{CDCl}_3$ , ppm):  $\delta$  -62.6. **HRMS (ESI)** calcd for  $[\text{M}+\text{Na}]^+$   $\text{C}_{20}\text{H}_{22}\text{F}_3\text{NNaO}_2$ ,  $m/z$ : 388.1495, found: 388.1497.

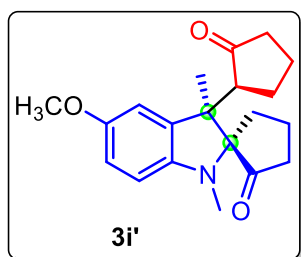

General procedure B was followed using **1i** (24.5 mg, 0.1 mmol) stirred for 8 h at rt. The crude mixture was purified by silica gel flash chromatography (petroleum ether/ethyl ether = 3:1) to afford the desired product as a mixture of two diastereoisomers (17.7 mg, 54% yield, 6.7:1 dr). The major isomer **3i'** was a colorless syrupy liquid after further column chromatography.

$R_f$  = 0.37 (petroleum ether/ethyl acetate = 5:1).  **$^1\text{H NMR}$**  (500 MHz,  $\text{C}_6\text{D}_6$ , ppm):  $\delta$  6.66-6.61 (m, 2H), 6.13 (d,  $J$  = 9.0 Hz, 1H), 3.56 (dd,  $J$  = 13.0, 8.5 Hz, 1H), 3.48 (s, 3H), 3.07-2.98 (m, 1H), 2.30 (s, 3H), 1.91-1.86 (m, 1H), 1.83-1.77 (m, 2H), 1.50-1.42 (m, 3H), 1.33-1.25 (m, 2H), 1.22 (s, 3H), 1.20-1.14 (m,

2H), 0.94-0.88 (m, 1H).  $^{13}\text{C}$  NMR (125 MHz,  $\text{C}_6\text{D}_6$ , ppm):  $\delta$  218.3, 215.8, 153.3, 145.3, 135.8, 128.1, 112.6, 111.7, 105.5, 84.4, 55.7, 51.1, 50.0, 39.2, 37.5, 30.3, 28.1, 24.5, 19.6, 17.8, 14.1. **HRMS (ESI)** calcd for  $[\text{M}+\text{Na}]^+$   $\text{C}_{20}\text{H}_{25}\text{NNaO}_3$ ,  $m/z$ : 350.1727, found: 350.1724.

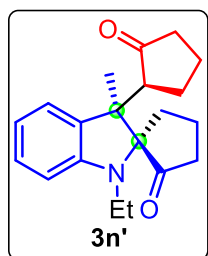

General procedure B was followed using **1n** (22.9 mg, 0.1 mmol) stirred for 8 h at rt. The crude mixture was purified by silica gel flash chromatography (petroleum ether/ethyl ether = 3:1) to afford the desired product as a mixture of two diastereoisomers (18.0 mg, 58% yield, 3.4:1 dr). The major isomer **3n'** was a colorless syrupy liquid after further column chromatography.

$R_f$  = 0.37 (petroleum ether/ethyl acetate = 5:1).  $^1\text{H}$  NMR (500 MHz,  $\text{CDCl}_3$ , ppm): 7.06 (t,  $J$  = 7.5 Hz, 1H), 6.88 (d,  $J$  = 7.5 Hz, 1H), 6.62 (t,  $J$  = 7.5 Hz, 1H), 6.32 (d,  $J$  = 8.0 Hz, 1H), 3.40-3.31 (m, 1H), 3.00-2.88 (m, 2H), 2.72-2.62 (m, 1H), 2.33-2.23 (m, 2H), 2.18-2.08 (m, 1H), 2.03-1.92 (m, 3H), 1.89-1.82 (m, 1H), 1.78-1.69 (m, 1H), 1.67-1.61 (m, 2H), 1.57-1.48 (m, 1H), 1.39 (s, 3H), 1.21 (t,  $J$  = 7.0 Hz, 3H).  $^{13}\text{C}$  NMR (125 MHz,  $\text{CDCl}_3$ , ppm):  $\delta$  220.1, 218.5, 149.4, 133.1, 127.9, 123.4, 116.5, 104.9, 84.7, 51.2, 49.9, 40.0, 39.5, 37.5, 28.0, 27.1, 19.5, 17.5, 14.0, 13.8. **HRMS (ESI)** calcd for  $[\text{M}+\text{Na}]^+$   $\text{C}_{20}\text{H}_{25}\text{NNaO}_2$ ,  $m/z$ : 334.1777, found: 334.1782.

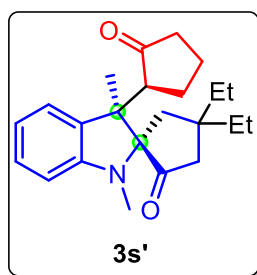

General procedure B was followed using **1s** (27.1 mg, 0.1 mmol) stirred for 8 h at rt. The crude mixture was purified by silica gel flash chromatography (petroleum ether/ethyl ether = 2:1) to afford the desired product as a mixture of two diastereoisomers (22.6 mg, 64% yield, 5.2:1 dr). The major isomer **3s'** was a light yellow syrupy liquid after further column chromatography.

$R_f = 0.37$  (petroleum ether/ethyl acetate = 5:1).  $^1\text{H NMR}$  (500 MHz,  $\text{CDCl}_3$ , ppm):  $\delta$  7.07 (td,  $J = 7.5$ , 1.5 Hz, 1H), 6.85 (d,  $J = 7.5$  Hz, 1H), 6.66 (t,  $J = 7.5$  Hz, 1H), 6.34 (d,  $J = 7.5$  Hz, 1H), 3.32 (dd,  $J = 13.0$ , 8.0 Hz, 1H), 2.98 (d,  $J = 17.0$  Hz, 1H), 2.55 (s, 3H), 2.34-2.22 (m, 2H), 2.10 (d,  $J = 16.0$  Hz, 1H), 2.03-1.92 (m, 1H), 1.87-1.79 (m, 1H), 1.65-1.59 (m, 2H), 1.56-1.48 (m, 3H), 1.43 (s, 3H), 1.39-1.25 (m, 3H), 0.83 (t,  $J = 7.5$  Hz, 3H), 0.79 (t,  $J = 7.5$  Hz, 3H).  $^{13}\text{C NMR}$  (125 MHz,  $\text{CDCl}_3$ , ppm):  $\delta$  219.5, 215.3, 150.3, 134.0, 128.0, 123.0, 117.6, 106.4, 86.1, 51.6, 51.1, 50.3, 39.5, 36.2, 33.5, 31.3, 30.6, 29.9, 28.9, 19.7, 15.0, 8.6, 7.9. **HRMS (ESI)** calcd for  $[\text{M}+\text{Na}]^+$   $\text{C}_{23}\text{H}_{31}\text{NNaO}_2$ ,  $m/z$ : 376.2247, found: 376.2245.

## 5. X-Ray Analysis of Compound 3a, 3h and 3h'

X-ray diffraction data of compound 3a

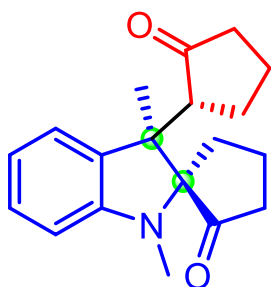

**3a**

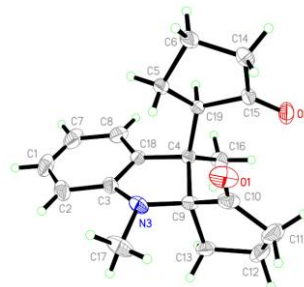

**CCDC 1992544**

### Crystal data and structure refinement for 3a

|                                   |                                                                                                                             |
|-----------------------------------|-----------------------------------------------------------------------------------------------------------------------------|
| Identification code               | <b>3a</b>                                                                                                                   |
| Empirical formula                 | C <sub>19</sub> H <sub>23</sub> NO <sub>2</sub>                                                                             |
| Formula weight                    | 297.38                                                                                                                      |
| Temperature                       | 296(2) K                                                                                                                    |
| Wavelength                        | 1.54178 Å                                                                                                                   |
| Crystal system, space group       | Monoclinic, P2(1)/c                                                                                                         |
| Unit cell dimensions              | a = 9.2267(7) Å      alpha = 90 deg.<br>b = 21.6420(17) Å    beta = 112.336(2) deg.<br>c = 8.7088(7) Å      gamma = 90 deg. |
| Volume                            | 1608.5(2) Å <sup>3</sup>                                                                                                    |
| Z, Calculated density             | 4, 1.228 Mg/m <sup>3</sup>                                                                                                  |
| Absorption coefficient            | 0.623 mm <sup>-1</sup>                                                                                                      |
| F(000)                            | 640                                                                                                                         |
| Crystal size                      | 0.200 x 0.200 x 0.200 mm                                                                                                    |
| Theta range for data collection   | 5.182 to 68.269 deg.                                                                                                        |
| Limiting indices                  | -11 ≤ h ≤ 11, -26 ≤ k ≤ 26, -10 ≤ l ≤ 10                                                                                    |
| Reflections collected / unique    | 24900 / 2913 [R(int) = 0.0256]                                                                                              |
| Completeness to theta = 67.679    | 98.9 %                                                                                                                      |
| Refinement method                 | Full-matrix least-squares on F <sup>2</sup>                                                                                 |
| Data / restraints / parameters    | 2913 / 2 / 205                                                                                                              |
| Goodness-of-fit on F <sup>2</sup> | 1.057                                                                                                                       |
| Final R indices [I > 2sigma(I)]   | R1 = 0.0511, wR2 = 0.1450                                                                                                   |
| R indices (all data)              | R1 = 0.0535, wR2 = 0.1478                                                                                                   |
| Extinction coefficient            | n/a                                                                                                                         |
| Largest diff. peak and hole       | 0.219 and -0.200 e.Å <sup>-3</sup>                                                                                          |

X-ray diffraction data of compound **3h**

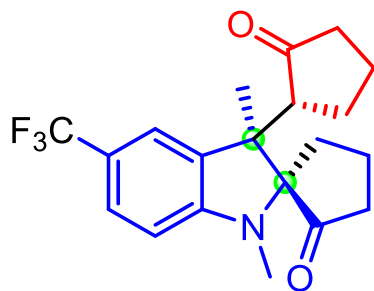

**3h**

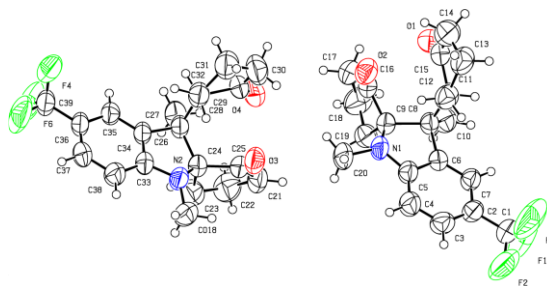

**CCDC: 2050194**

**Crystal data and structure refinement for 3h**

|                                   |                                                                                                                                       |
|-----------------------------------|---------------------------------------------------------------------------------------------------------------------------------------|
| Identification code               | <b>3h</b>                                                                                                                             |
| Empirical formula                 | $C_{40}H_{43}F_6N_2O_4$                                                                                                               |
| Formula weight                    | 729.76                                                                                                                                |
| Temperature                       | 297(2) K                                                                                                                              |
| Wavelength                        | 1.54178 Å                                                                                                                             |
| Crystal system, space group       | Triclinic, P-1                                                                                                                        |
| Unit cell dimensions              | a = 10.2944(6) Å    alpha = 68.586(2) deg.<br>b = 12.0674(7) Å    beta = 89.702(3) deg.<br>c = 15.9401(8) Å    gamma = 78.260(3) deg. |
| Volume                            | 1799.73(18) Å <sup>3</sup>                                                                                                            |
| Z, Calculated density             | 2, 1.347 Mg/m <sup>3</sup>                                                                                                            |
| Absorption coefficient            | 0.908 mm <sup>-1</sup>                                                                                                                |
| F(000)                            | 766                                                                                                                                   |
| Crystal size                      | 0.200 x 0.100 x 0.100 mm                                                                                                              |
| Theta range for data collection   | 2.986 to 68.324 deg.                                                                                                                  |
| Limiting indices                  | -11 ≤ h ≤ 12, -14 ≤ k ≤ 14, -19 ≤ l ≤ 19                                                                                              |
| Reflections collected / unique    | 19333 / 6484 [R(int) = 0.0676]                                                                                                        |
| Completeness to theta = 67.679    | 98.5 %                                                                                                                                |
| Refinement method                 | Full-matrix least-squares on F <sup>2</sup>                                                                                           |
| Data / restraints / parameters    | 6484 / 0 / 473                                                                                                                        |
| Goodness-of-fit on F <sup>2</sup> | 1.634                                                                                                                                 |
| Final R indices [I > 2σ(I)]       | R1 = 0.0924, wR2 = 0.2598                                                                                                             |
| R indices (all data)              | R1 = 0.1297, wR2 = 0.2891                                                                                                             |
| Extinction coefficient            | n/a                                                                                                                                   |
| Largest diff. peak and hole       | 0.592 and -0.363 e.Å <sup>-3</sup>                                                                                                    |

X-ray diffraction data of compound **3h'**

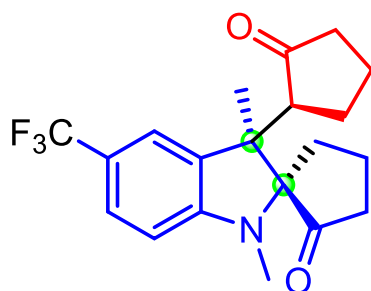

**3h'**

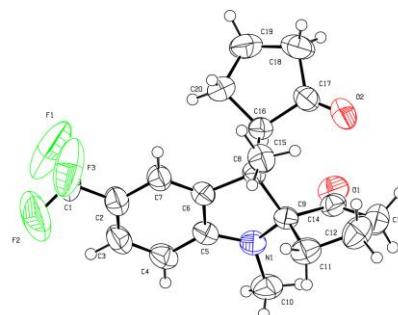

**CCDC 2050195**

**Crystal data and structure refinement for 3h'**

|                                   |                                                                                                                     |
|-----------------------------------|---------------------------------------------------------------------------------------------------------------------|
| Identification code               | <b>3h'</b>                                                                                                          |
| Empirical formula                 | $\text{C}_{20}\text{H}_{22}\text{F}_3\text{NO}_2$                                                                   |
| Formula weight                    | 365.38                                                                                                              |
| Temperature                       | 293(2) K                                                                                                            |
| Wavelength                        | 1.54178 Å                                                                                                           |
| Crystal system, space group       | Orthorhombic, $Pbca$                                                                                                |
| Unit cell dimensions              | $a = 10.432$ Å $\alpha = 90$ deg.<br>$b = 10.4321(5)$ Å $\beta = 90$ deg.<br>$c = 32.8983(16)$ Å $\gamma = 90$ deg. |
| Volume                            | $3580.2(2)$ Å <sup>3</sup>                                                                                          |
| Z, Calculated density             | 8, 1.356 Mg/m <sup>3</sup>                                                                                          |
| Absorption coefficient            | $0.913$ mm <sup>-1</sup>                                                                                            |
| F(000)                            | 1536                                                                                                                |
| Crystal size                      | 0.180 x 0.160 x 0.150 mm                                                                                            |
| Theta range for data collection   | 2.686 to 68.348 deg.                                                                                                |
| Limiting indices                  | $-12 \leq h \leq 11$ , $-12 \leq k \leq 12$ , $-39 \leq l \leq 39$                                                  |
| Reflections collected / unique    | 26856 / 3276 [R(int) = 0.0460]                                                                                      |
| Completeness to theta = 67.679    | 99.7 %                                                                                                              |
| Refinement method                 | Full-matrix least-squares on F <sup>2</sup>                                                                         |
| Data / restraints / parameters    | 3276 / 0 / 237                                                                                                      |
| Goodness-of-fit on F <sup>2</sup> | 1.065                                                                                                               |
| Final R indices [I > 2σ(I)]       | R1 = 0.0663, wR2 = 0.1961                                                                                           |
| R indices (all data)              | R1 = 0.0753, wR2 = 0.2081                                                                                           |
| Extinction coefficient            | n/a                                                                                                                 |
| Largest diff. peak and hole       | 0.875 and -0.416 e.Å <sup>-3</sup>                                                                                  |

## 6. References

- 1 (a) Cheng, H.-G.; Lu, L.-Q.; Wang, T.; Yang, Q.-Q.; Liu, X.-P.; Li, Y.; Deng, Q.-H.; Chen, J.-R.; Xiao, W.-J., Highly Enantioselective Friedel–Crafts Alkylation/N-Hemiacetalization Cascade Reaction with Indoles. *Angew. Chem. Int. Ed.* **2013**, *52*, 3250-3254. (b) Chen, W.; Xia, Y.; Lin, L.; Yuan, X.; Guo, S.; Liu, X.; Feng, X., Asymmetric Synthesis of Furo[3,4-b]indoles by Catalytic [3+2] Cycloaddition of Indoles with Epoxides. *Chem. Eur. J.* **2015**, *21*, 15104-15107.
- 2 Wang, S.-H.; Si, R.-Q.; Zhuang, Q.-B.; Guo, X.; Ke, T.; Zhang, X.-M.; Zhang, F.-M.; Tu, Y.-Q., Collective Total Synthesis of Aspidofractinine Alkaloids through the Development of a Bischler–Napieralski/Semipinacol Rearrangement Reaction. *Angew. Chem. Int. Ed.* **2020**, *59*, 21954-21958.
- 3 Peng, J.-B.; Qi, Y.; Ma, A.-J.; Tu, Y.-Q.; Zhang, F.-M.; Wang, S.-H.; Zhang, S.-Y., Cascade Oxidative Dearomatization/Semipinacol Rearrangement: An Approach to 2-Spirocyclo-3-oxindole Derivatives. *Chem. Asian J.* **2013**, *8*, 883-887.

## 7. Copies of NMR Spectra

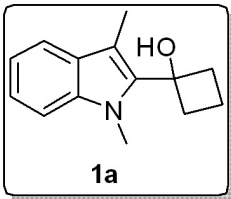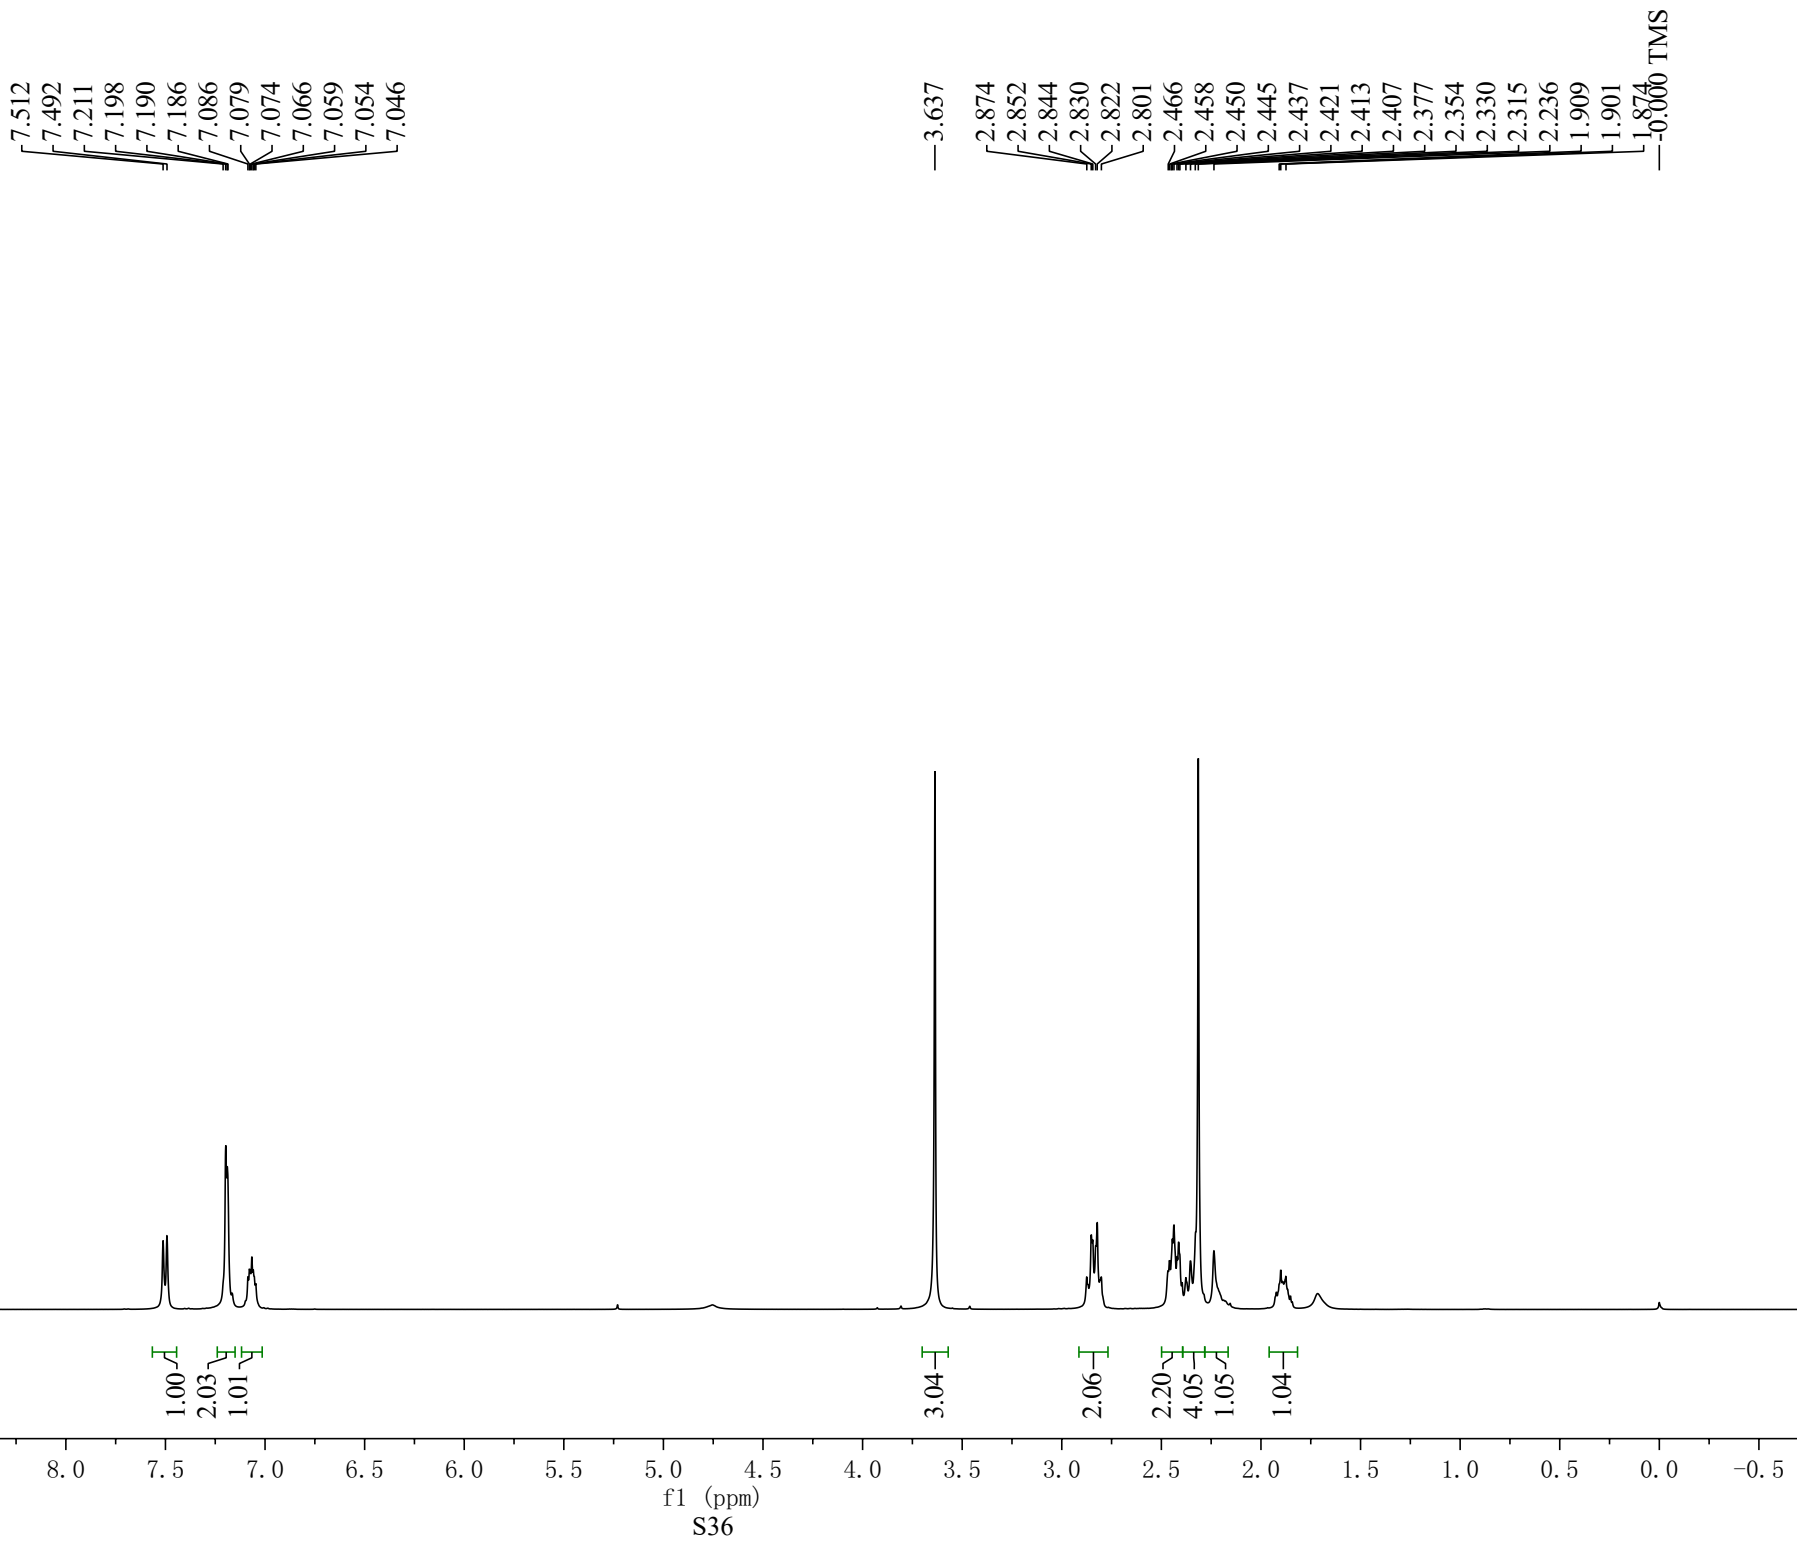



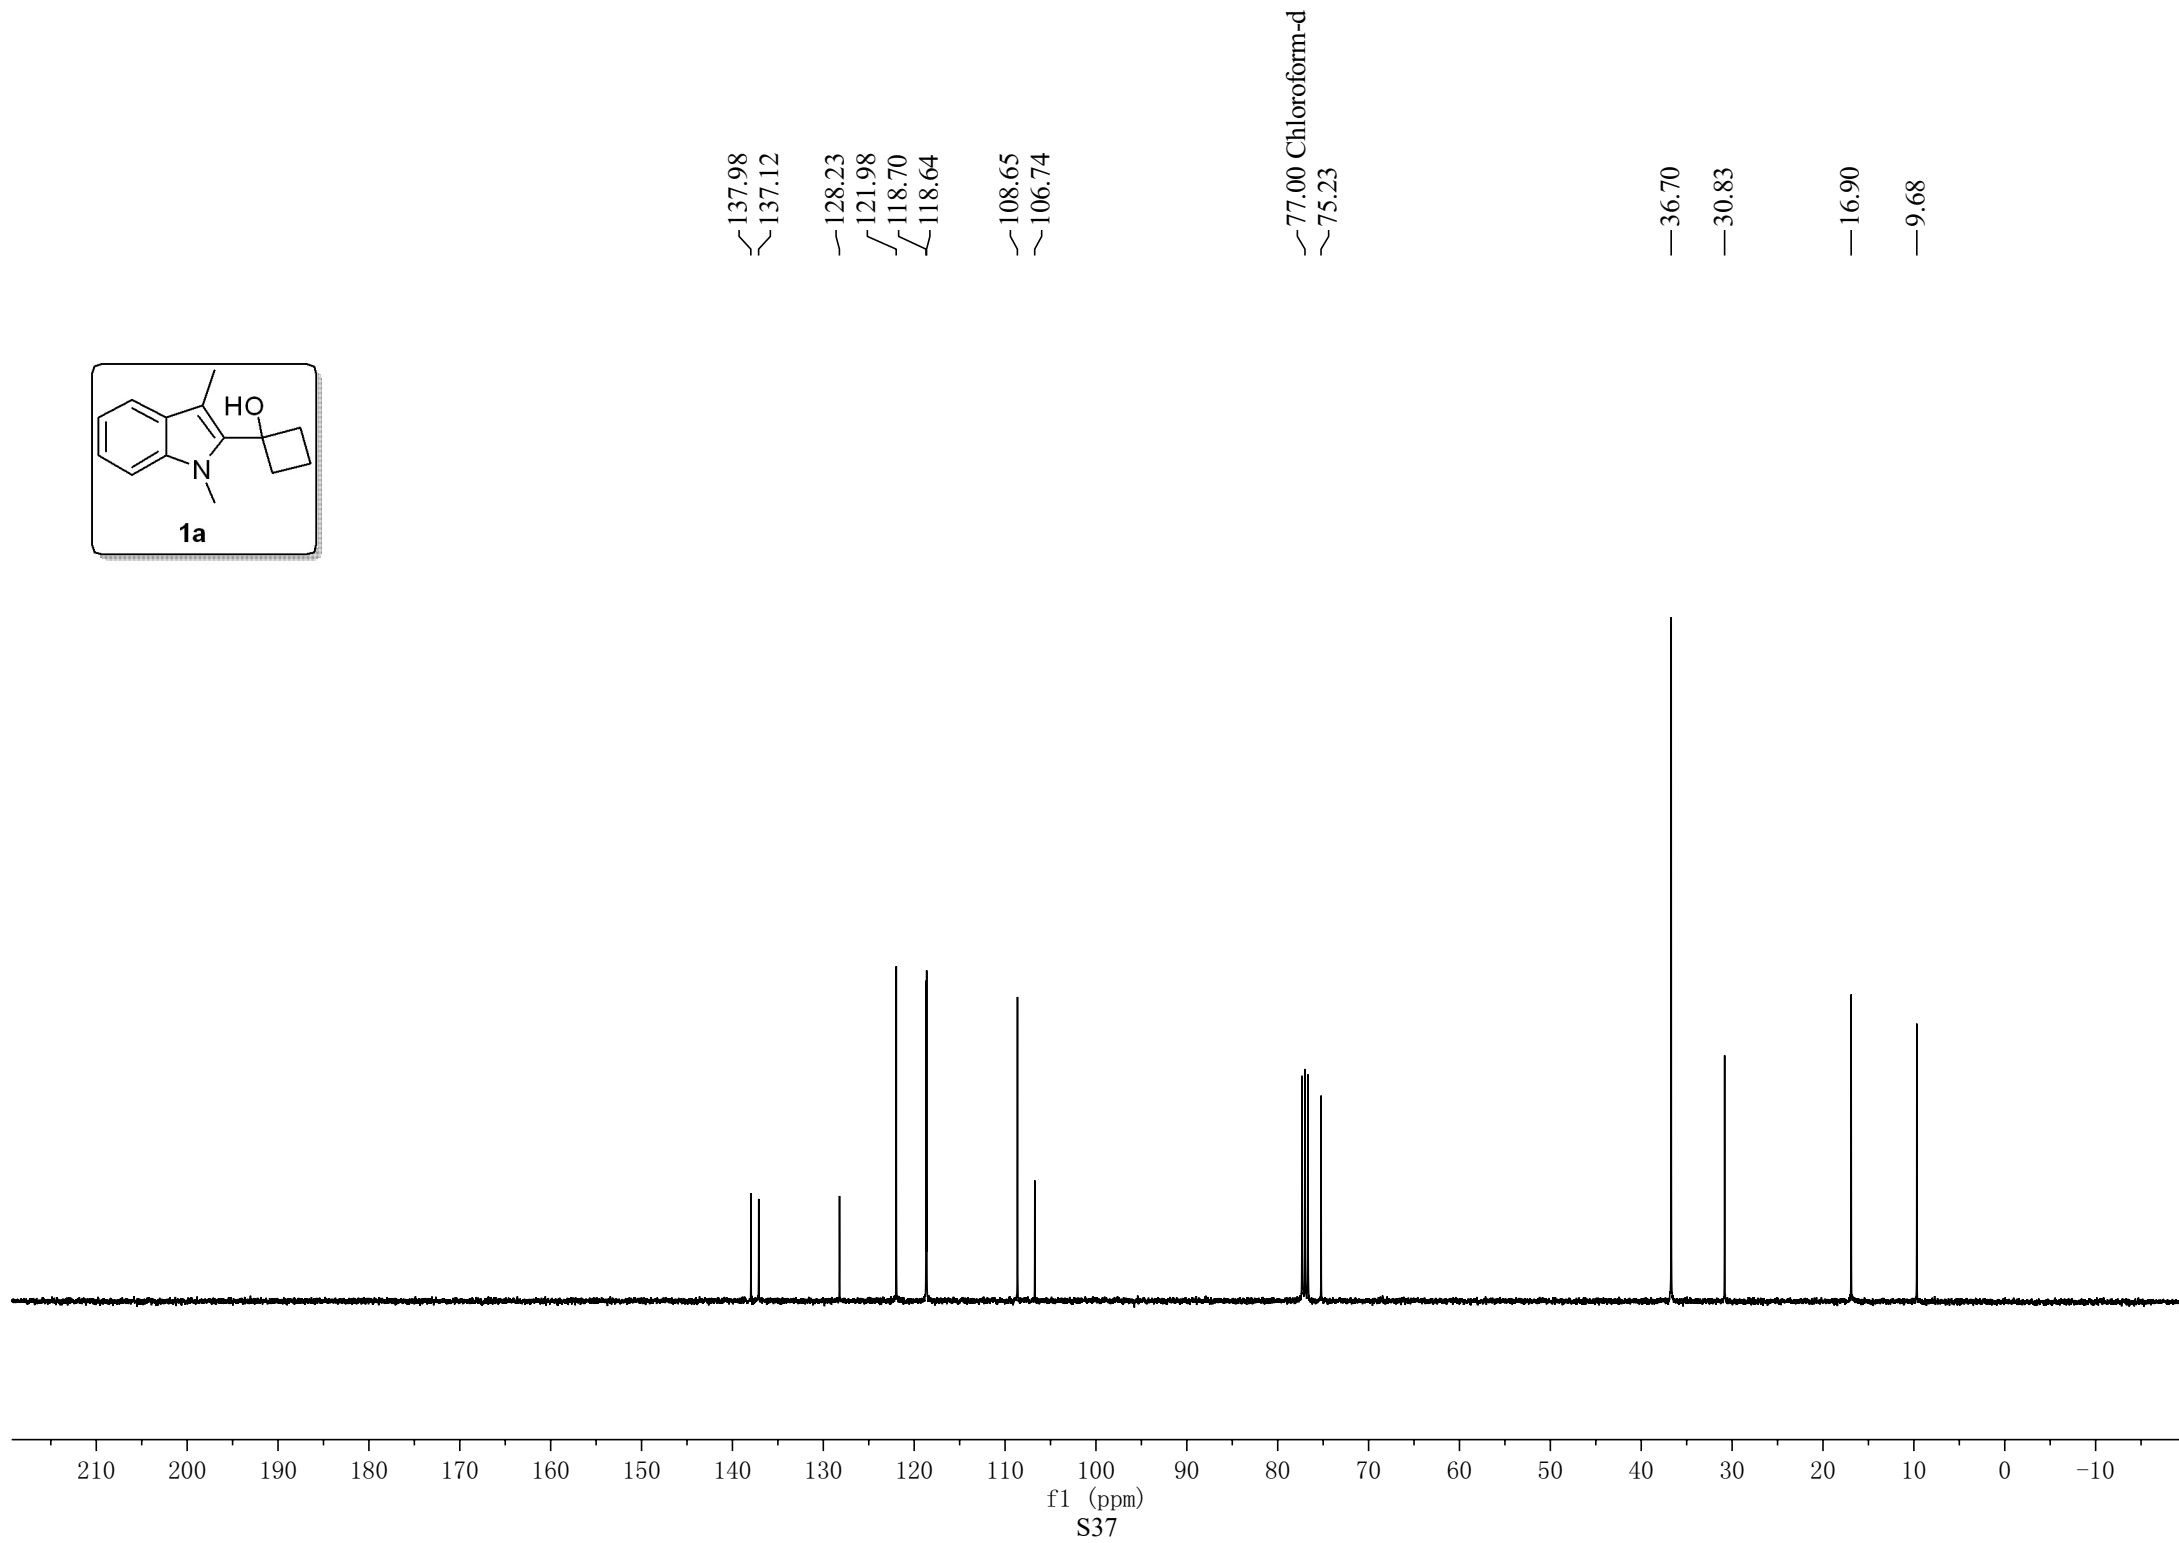

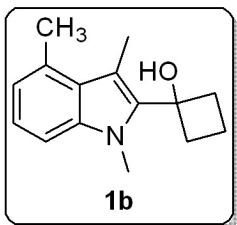

7.180  
7.175  
7.160 Benzene-d6  
7.149  
7.144  
6.929  
6.917  
6.916  
6.914  
6.905  
6.903  
6.902  
6.900

3.211  
2.684  
2.510  
2.492  
2.352  
2.235  
2.233  
1.715  
1.712  
1.706  
1.696  
1.694  
1.685  
1.676  
1.673  
1.664  
1.658  
1.655

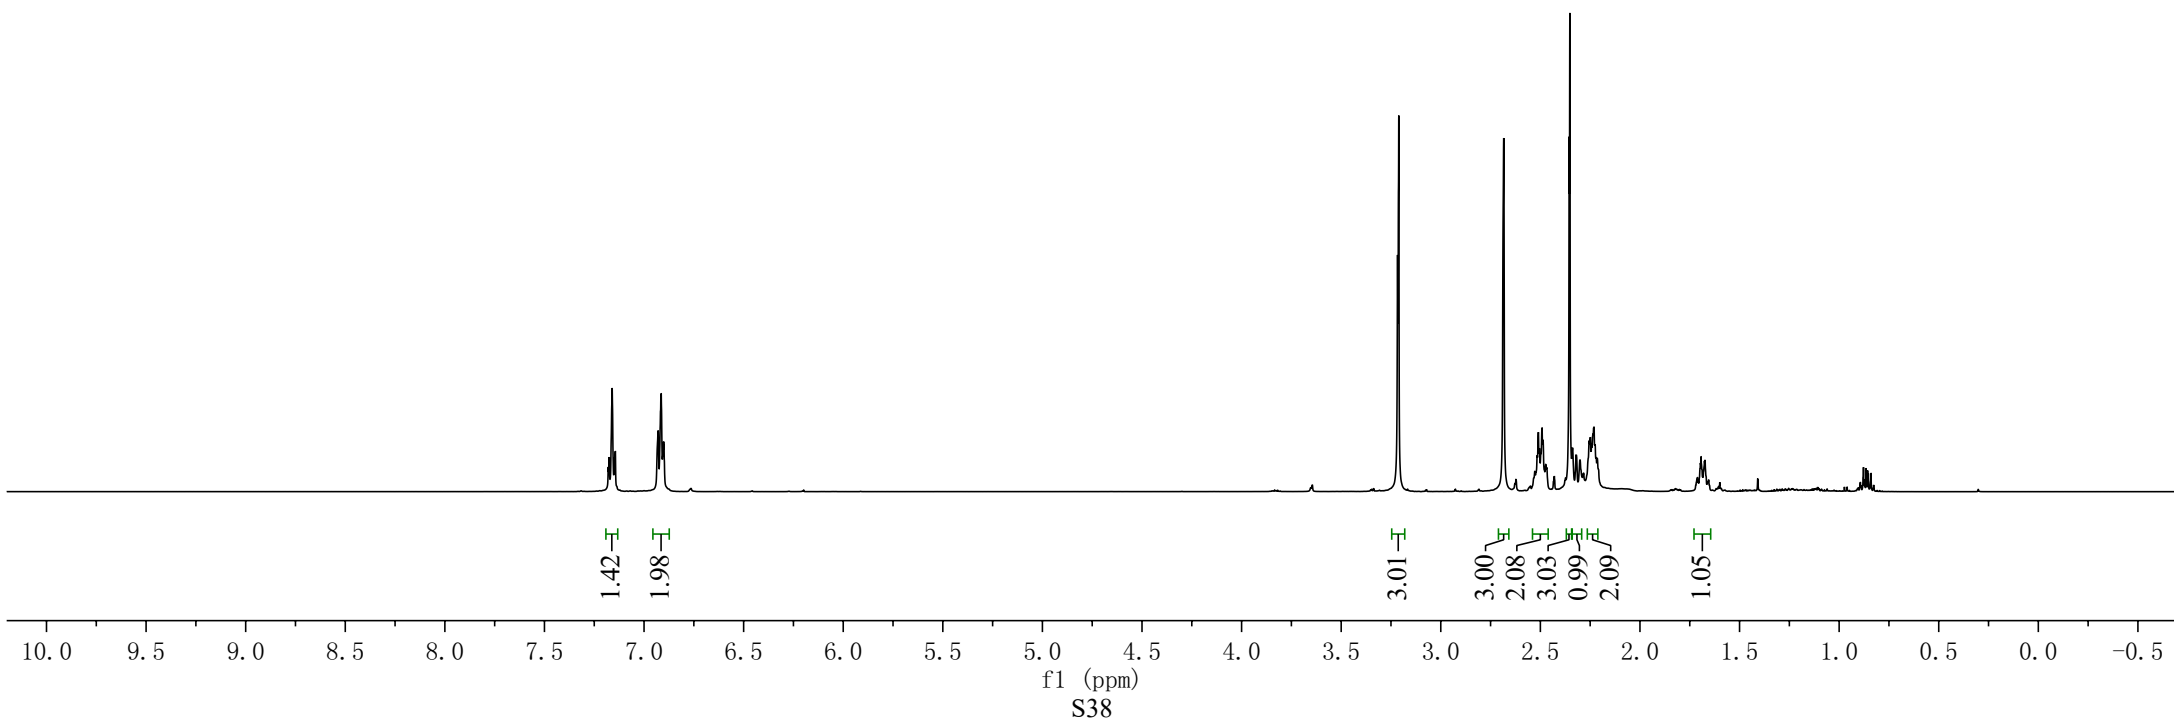

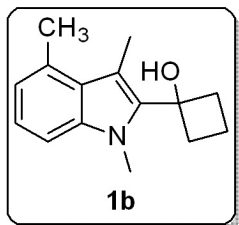

138.443  
138.238  
131.336  
128.060 Benzene-d6  
127.276  
122.186  
121.366

108.161  
107.298

75.347

37.448

30.739

21.160  
17.801  
12.623

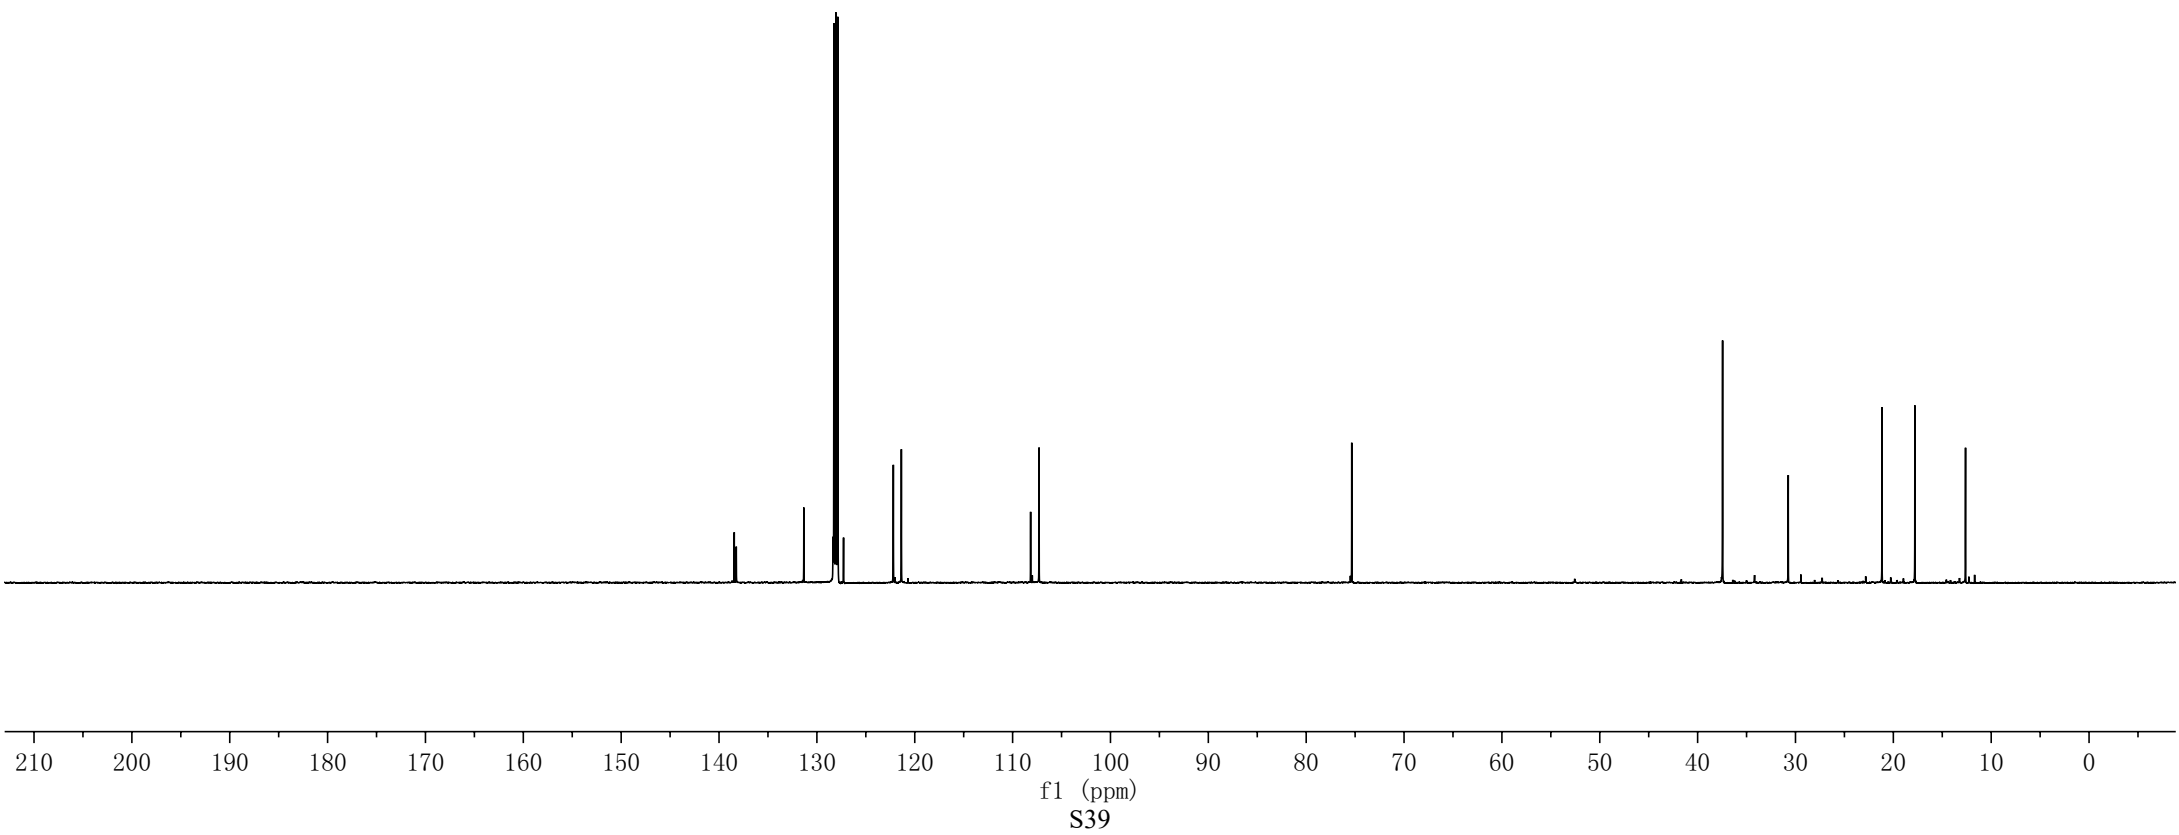

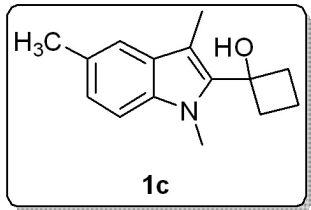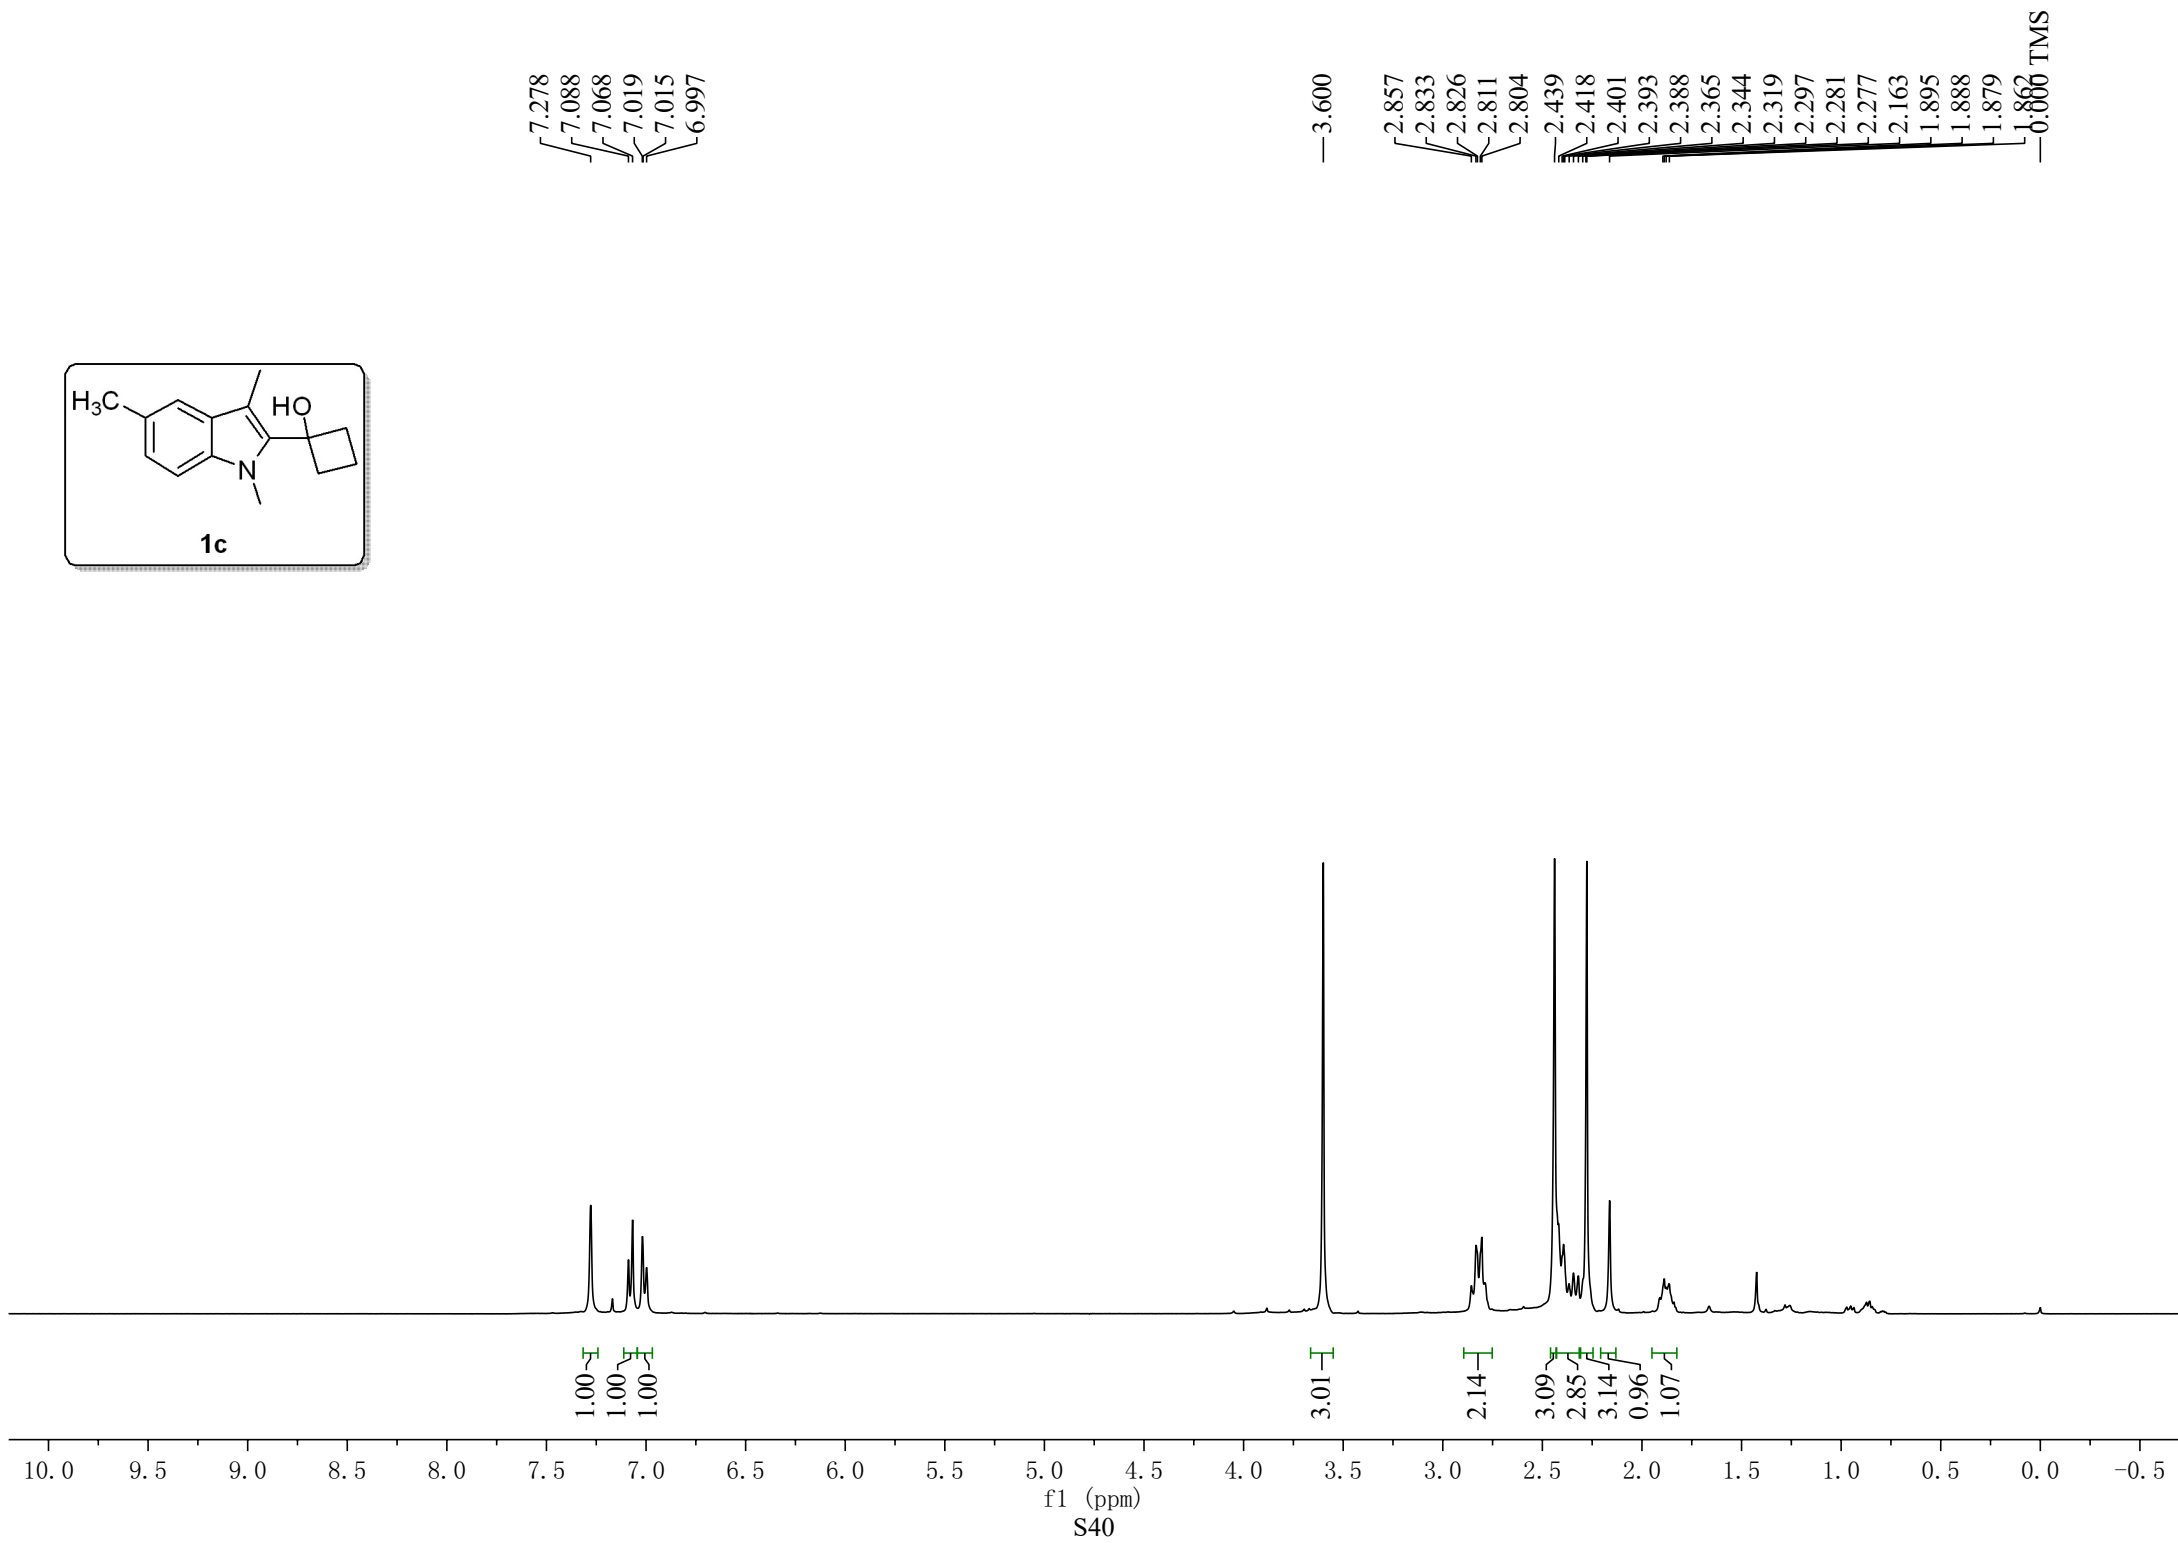

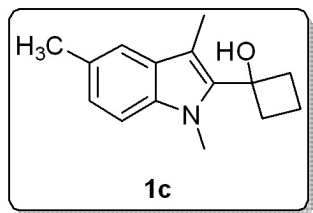

138.05  
135.55  
128.37  
127.83  
123.55  
118.29  
108.36  
106.18

77.00 Chloroform-d  
75.26

36.68  
30.83  
21.40  
16.92  
9.66

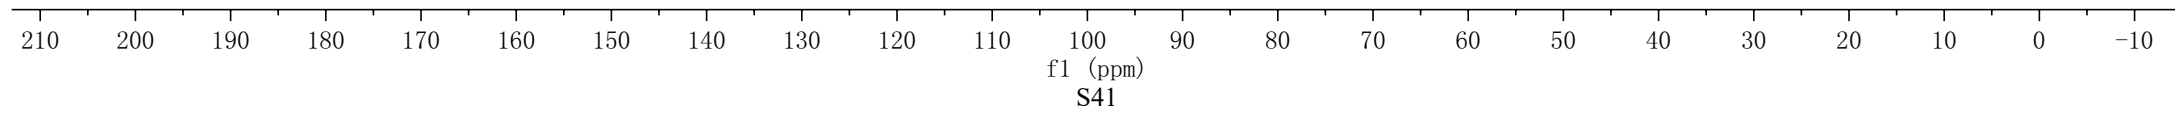

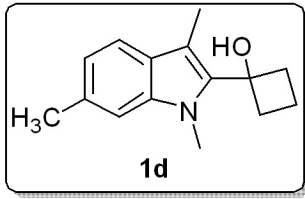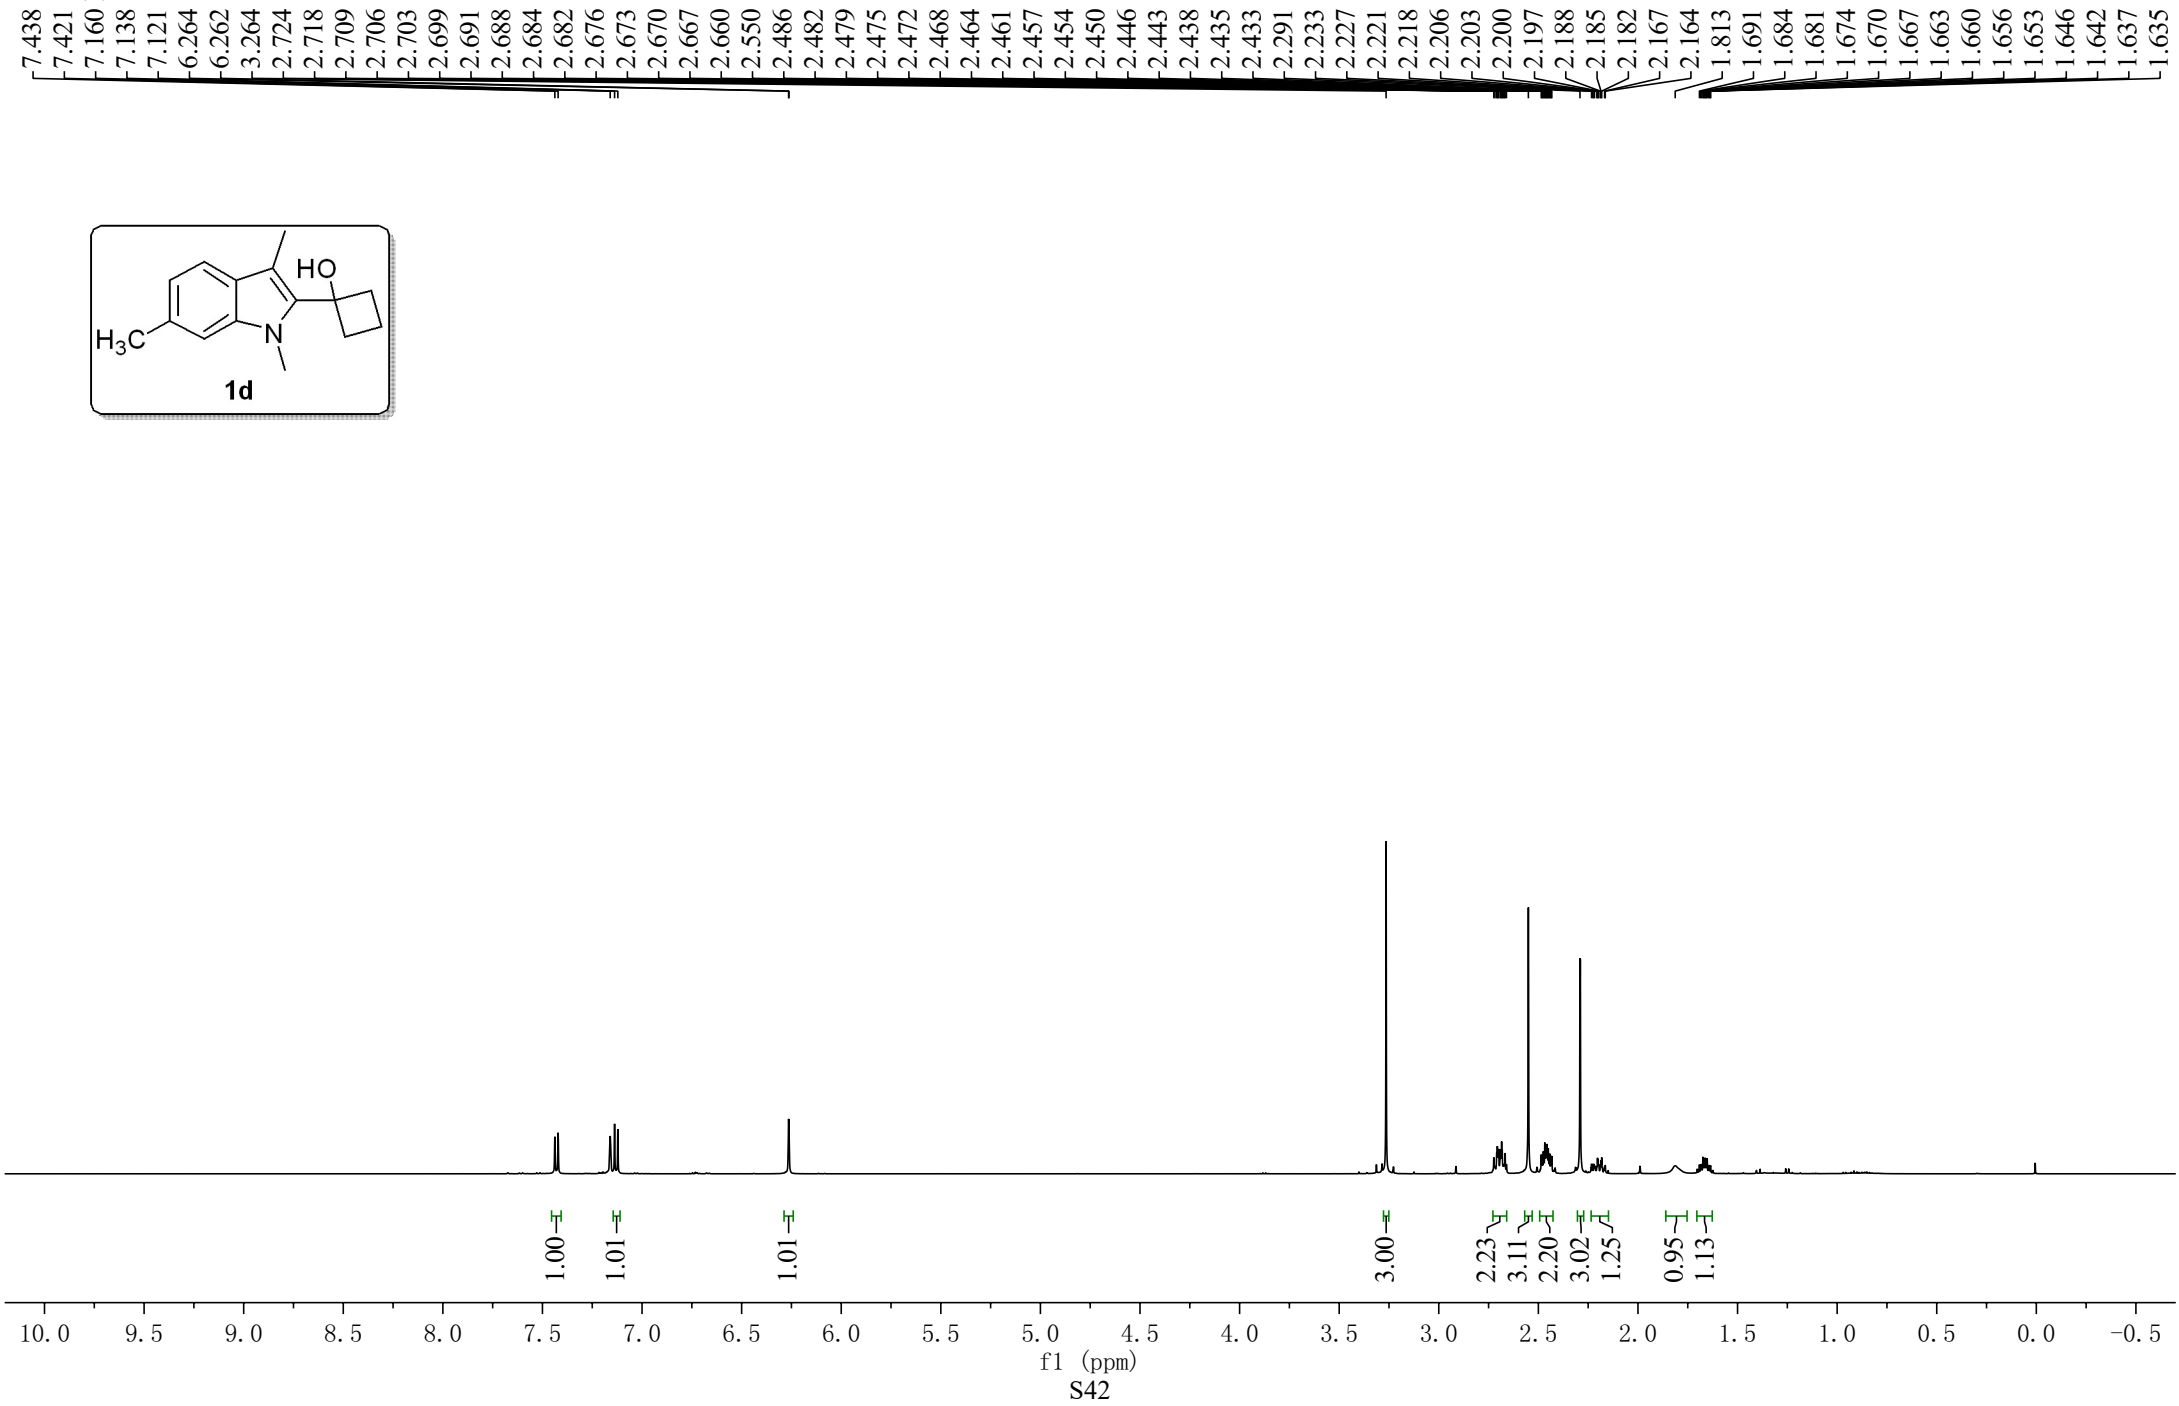

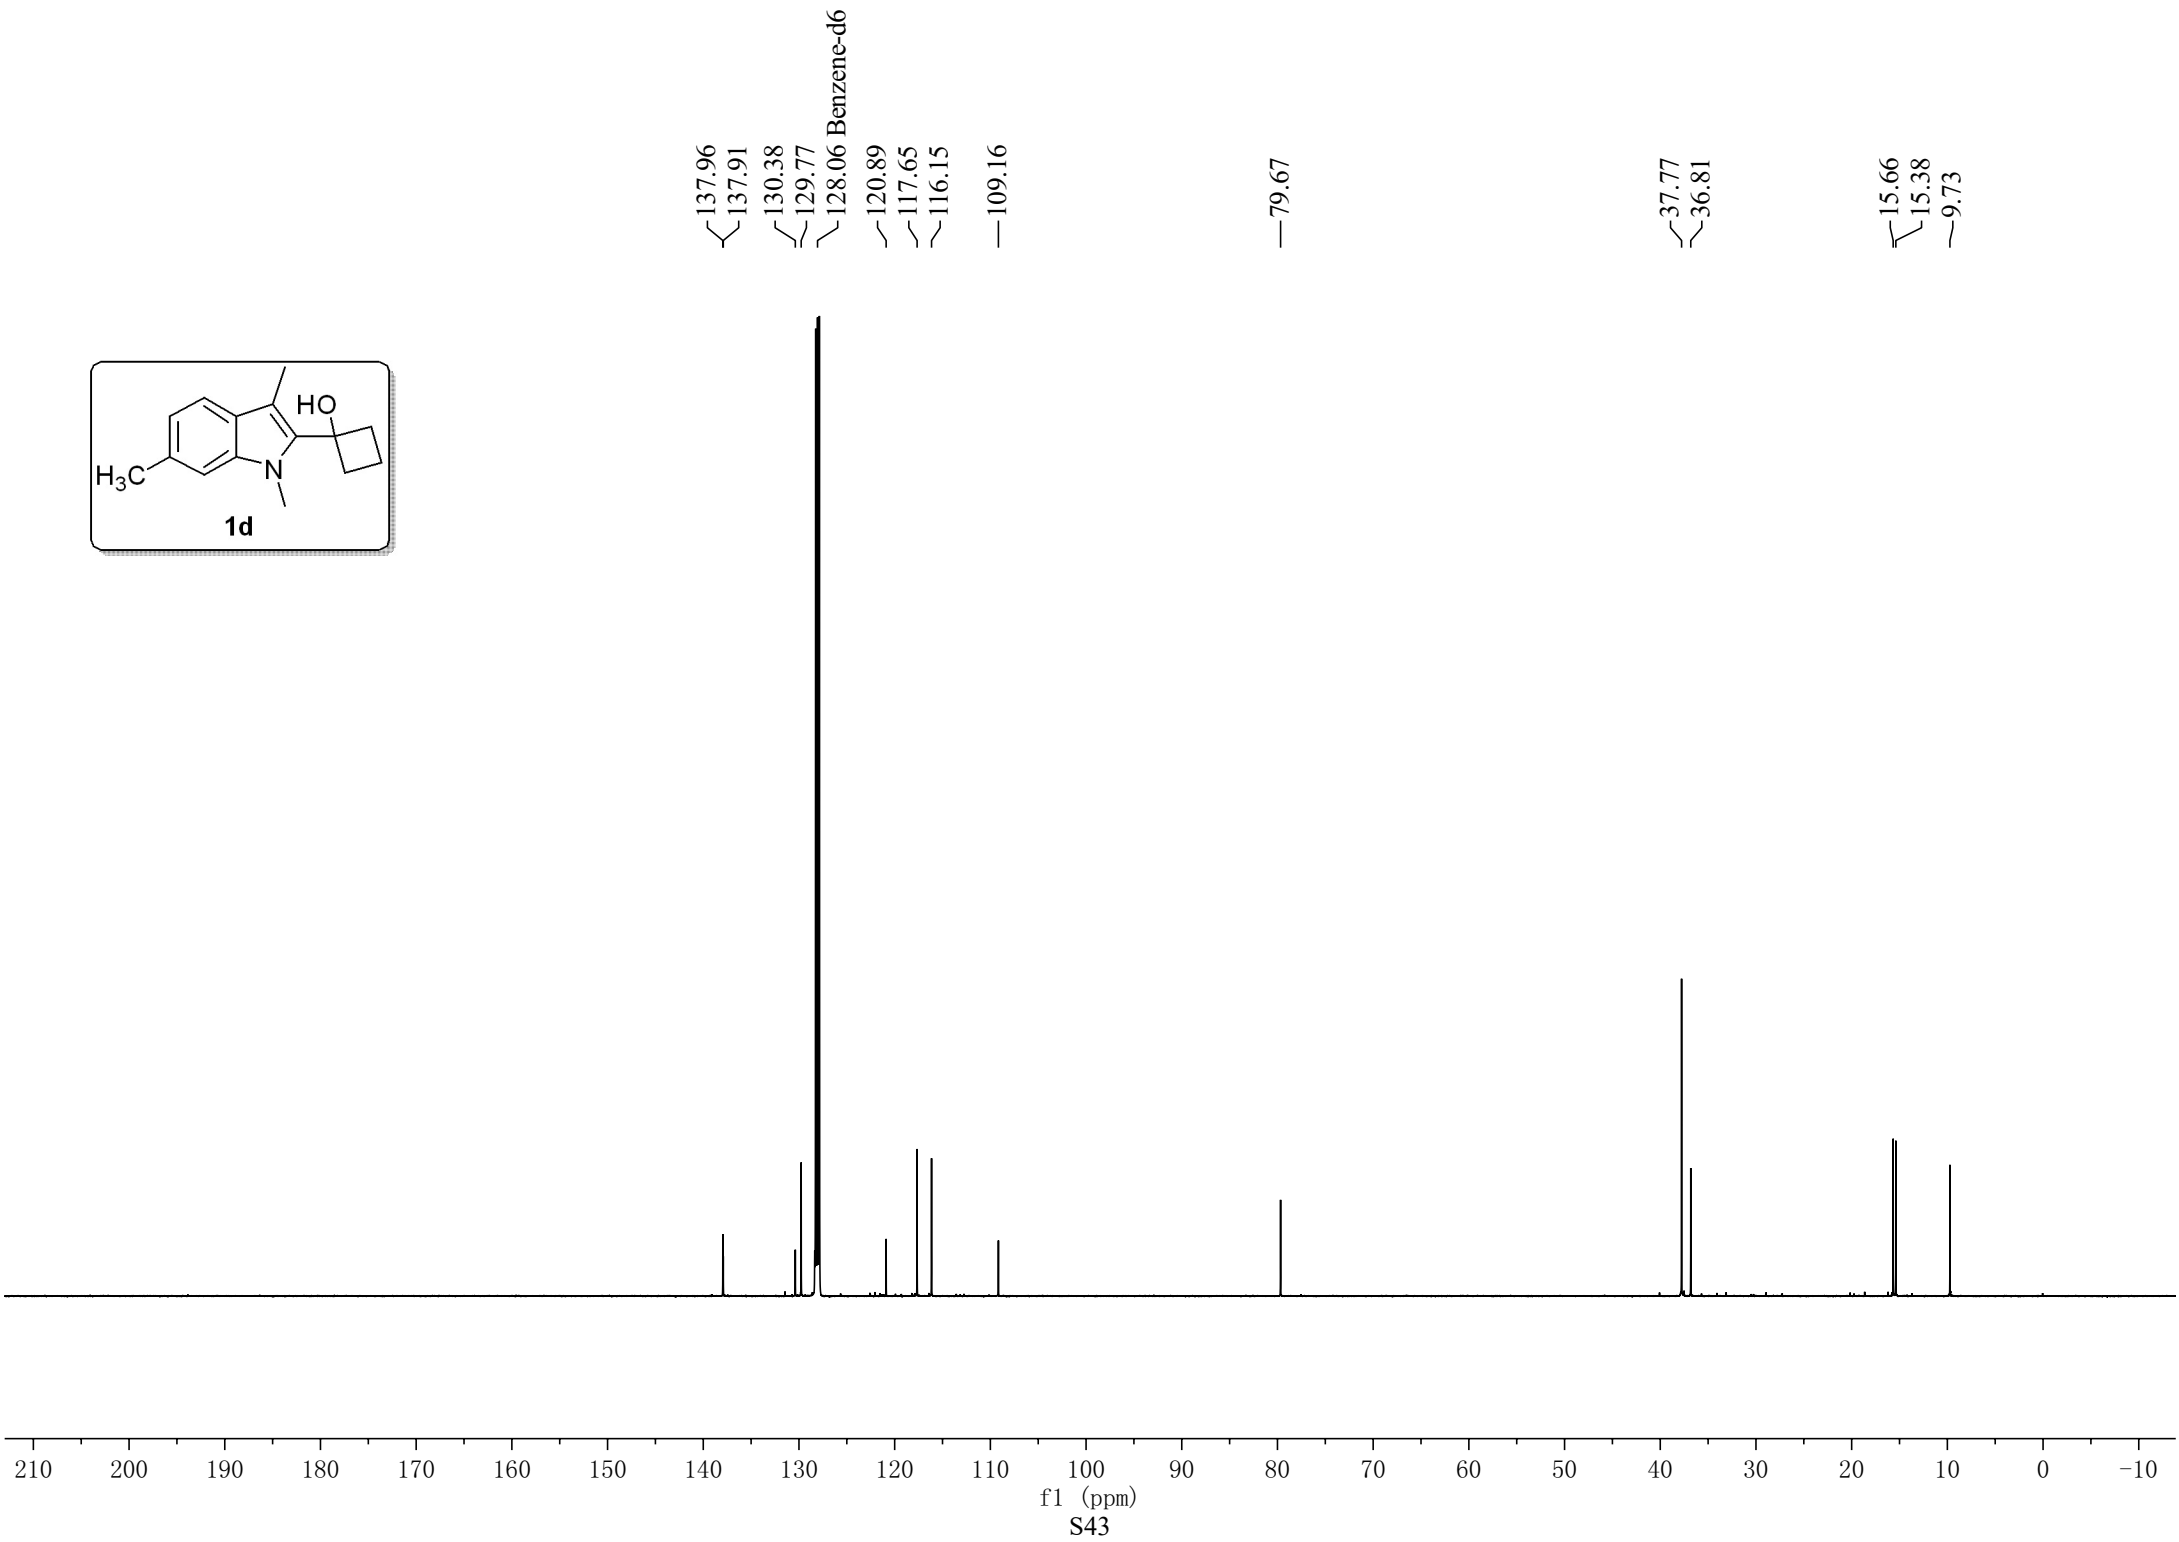

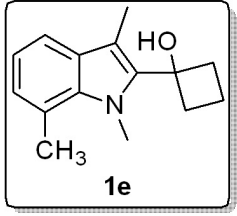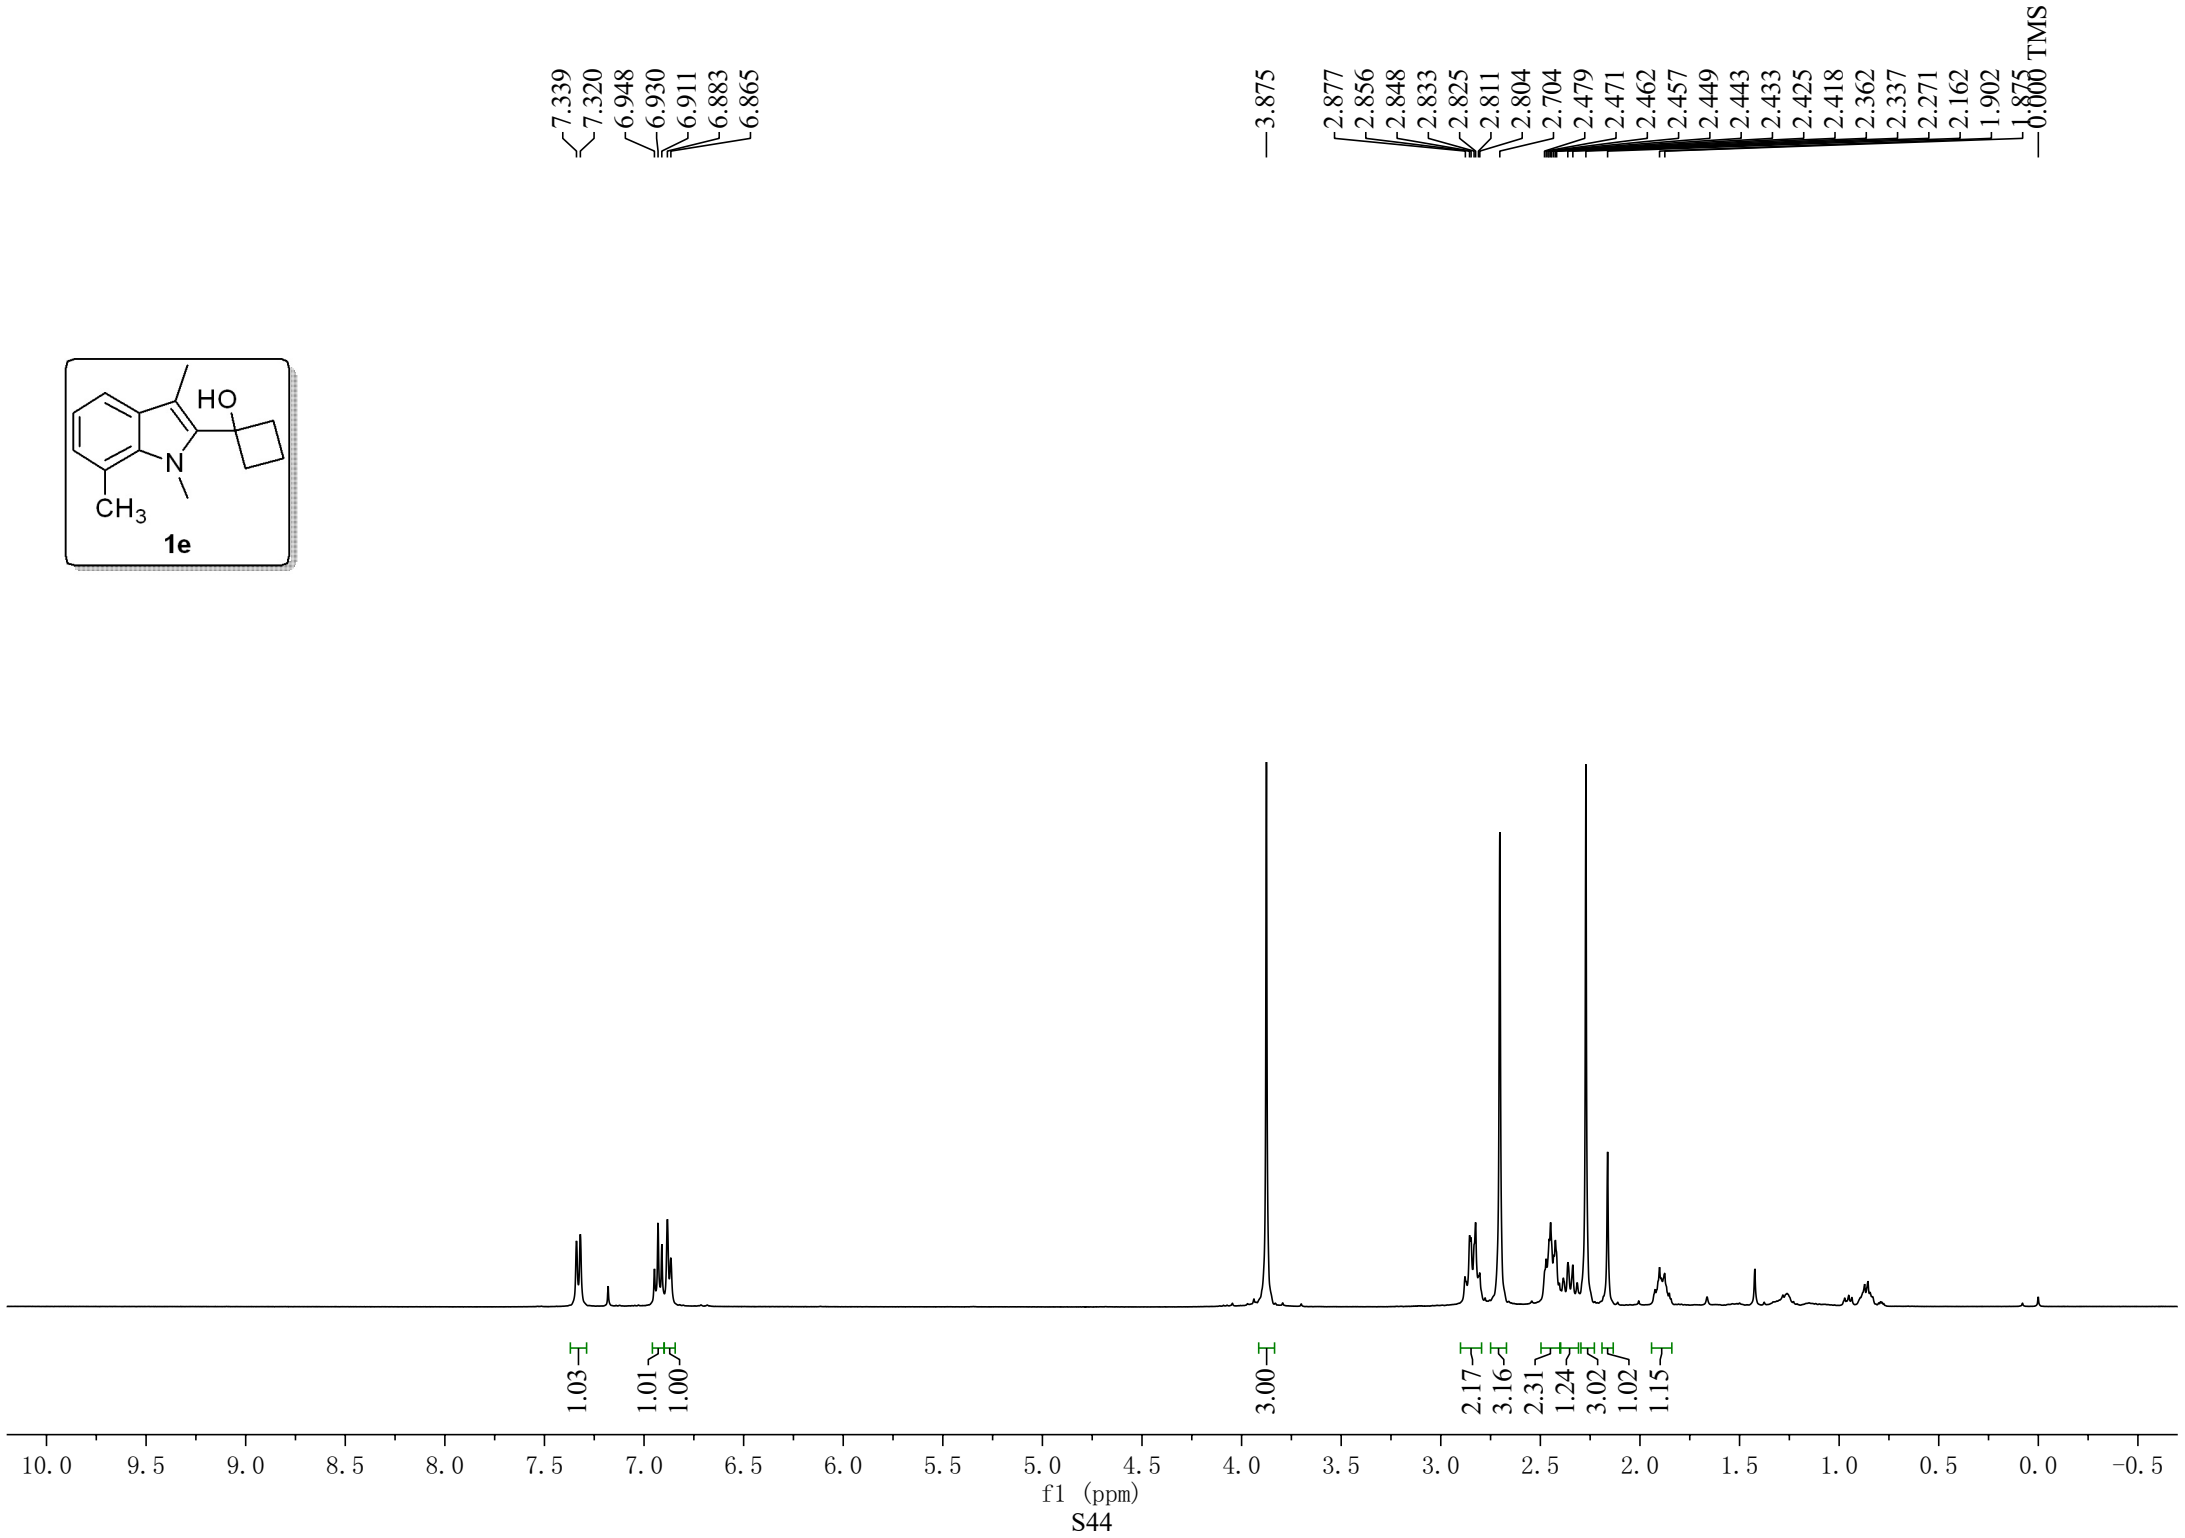



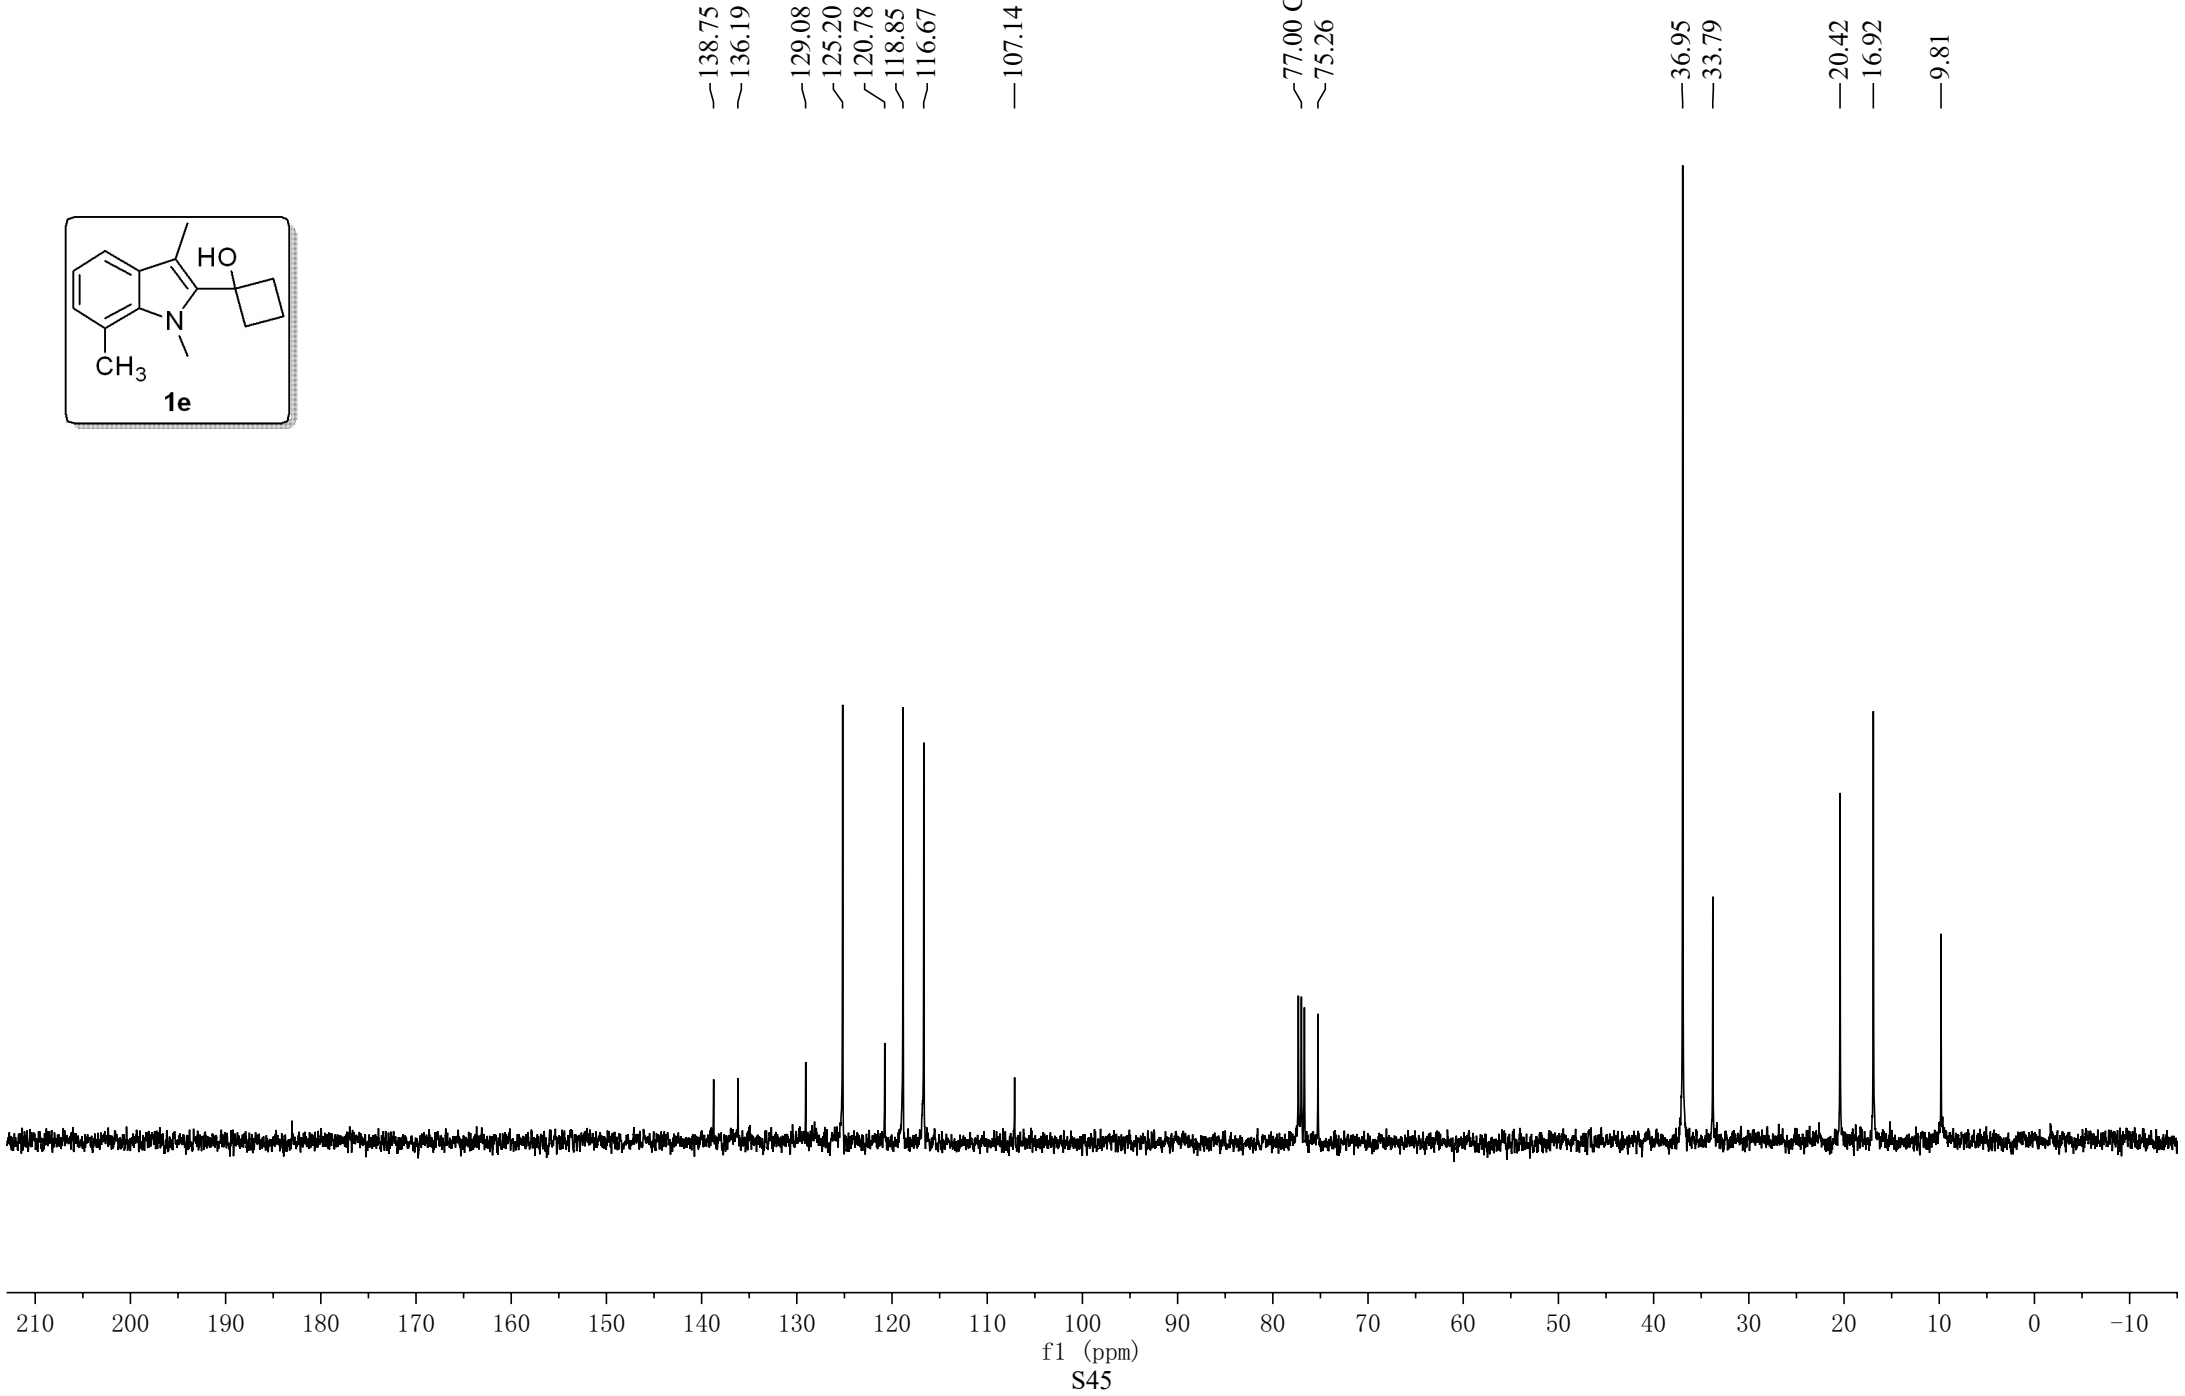

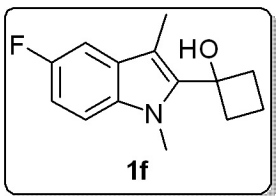

7.275  
7.270  
7.255  
7.251  
7.160 Benzene-d6  
7.013  
7.008  
6.995  
6.990  
6.977  
6.972  
6.752  
6.743  
6.734  
6.726

3.152  
2.455  
2.437  
2.431  
2.145  
2.126  
2.120  
2.058  
1.653  
1.641  
1.639  
1.634  
1.632  
1.628  
1.625  
1.623  
1.621  
1.617  
1.614  
1.610  
1.608  
1.596  
1.587  
1.585

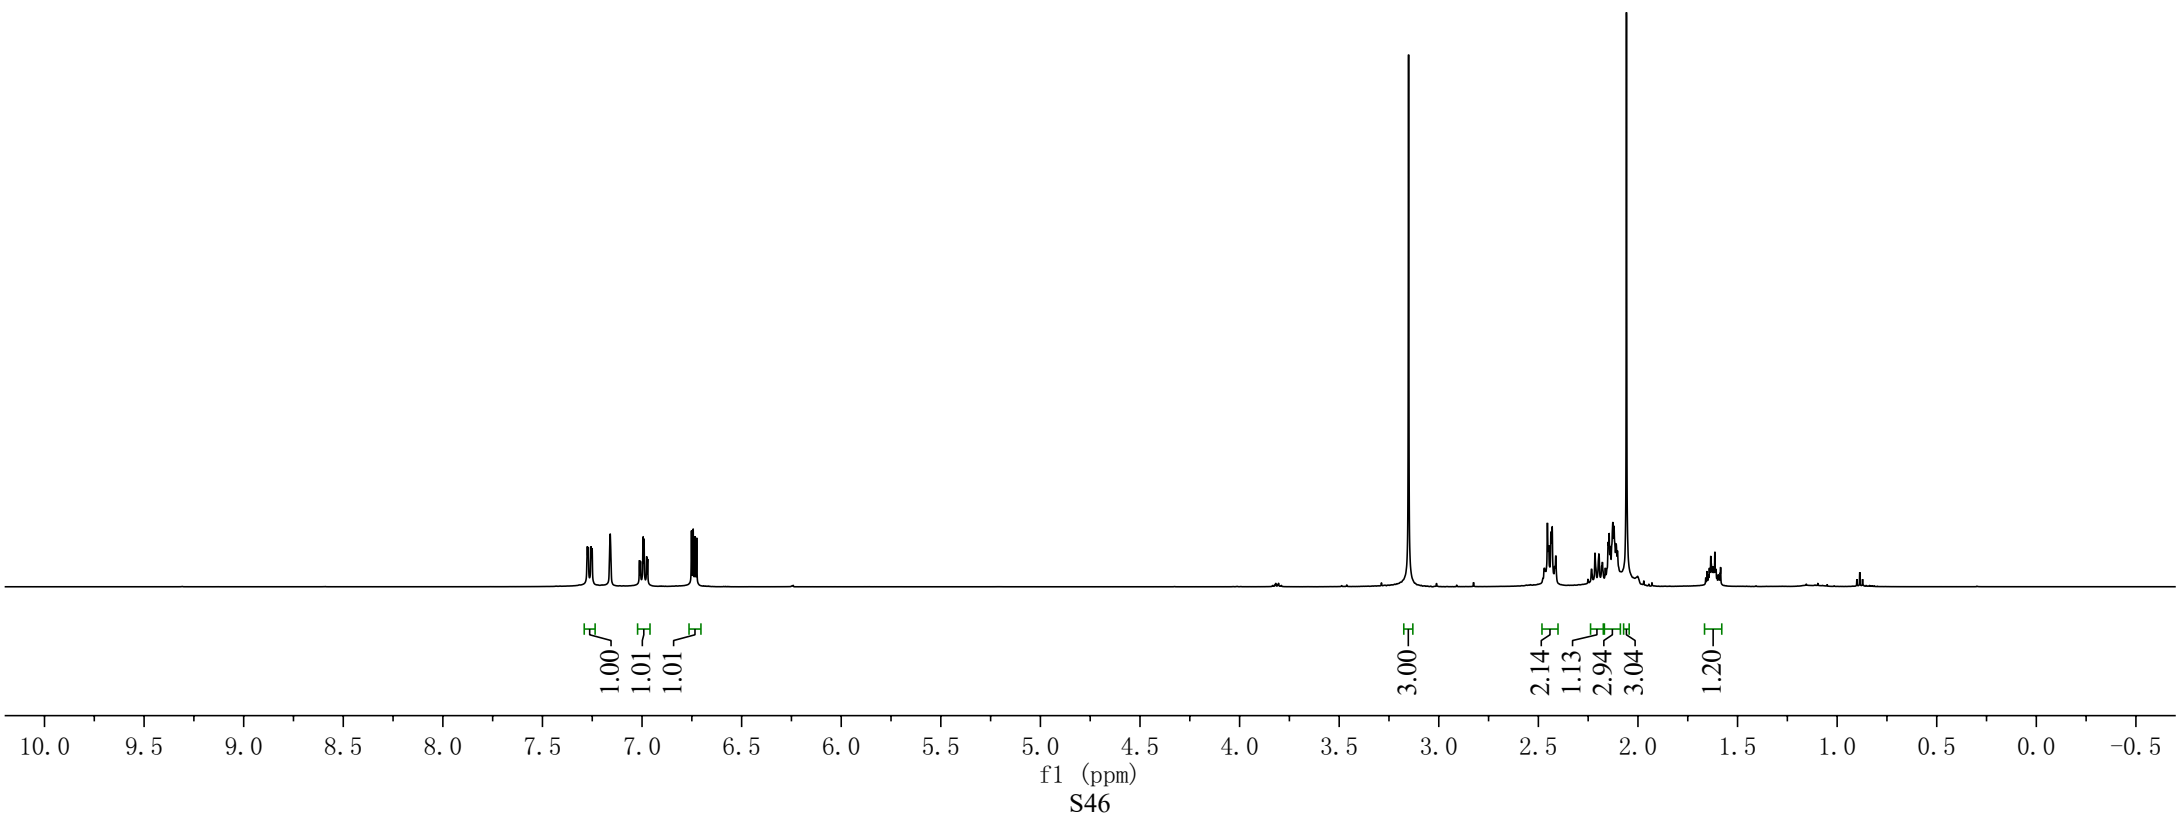

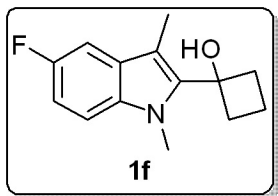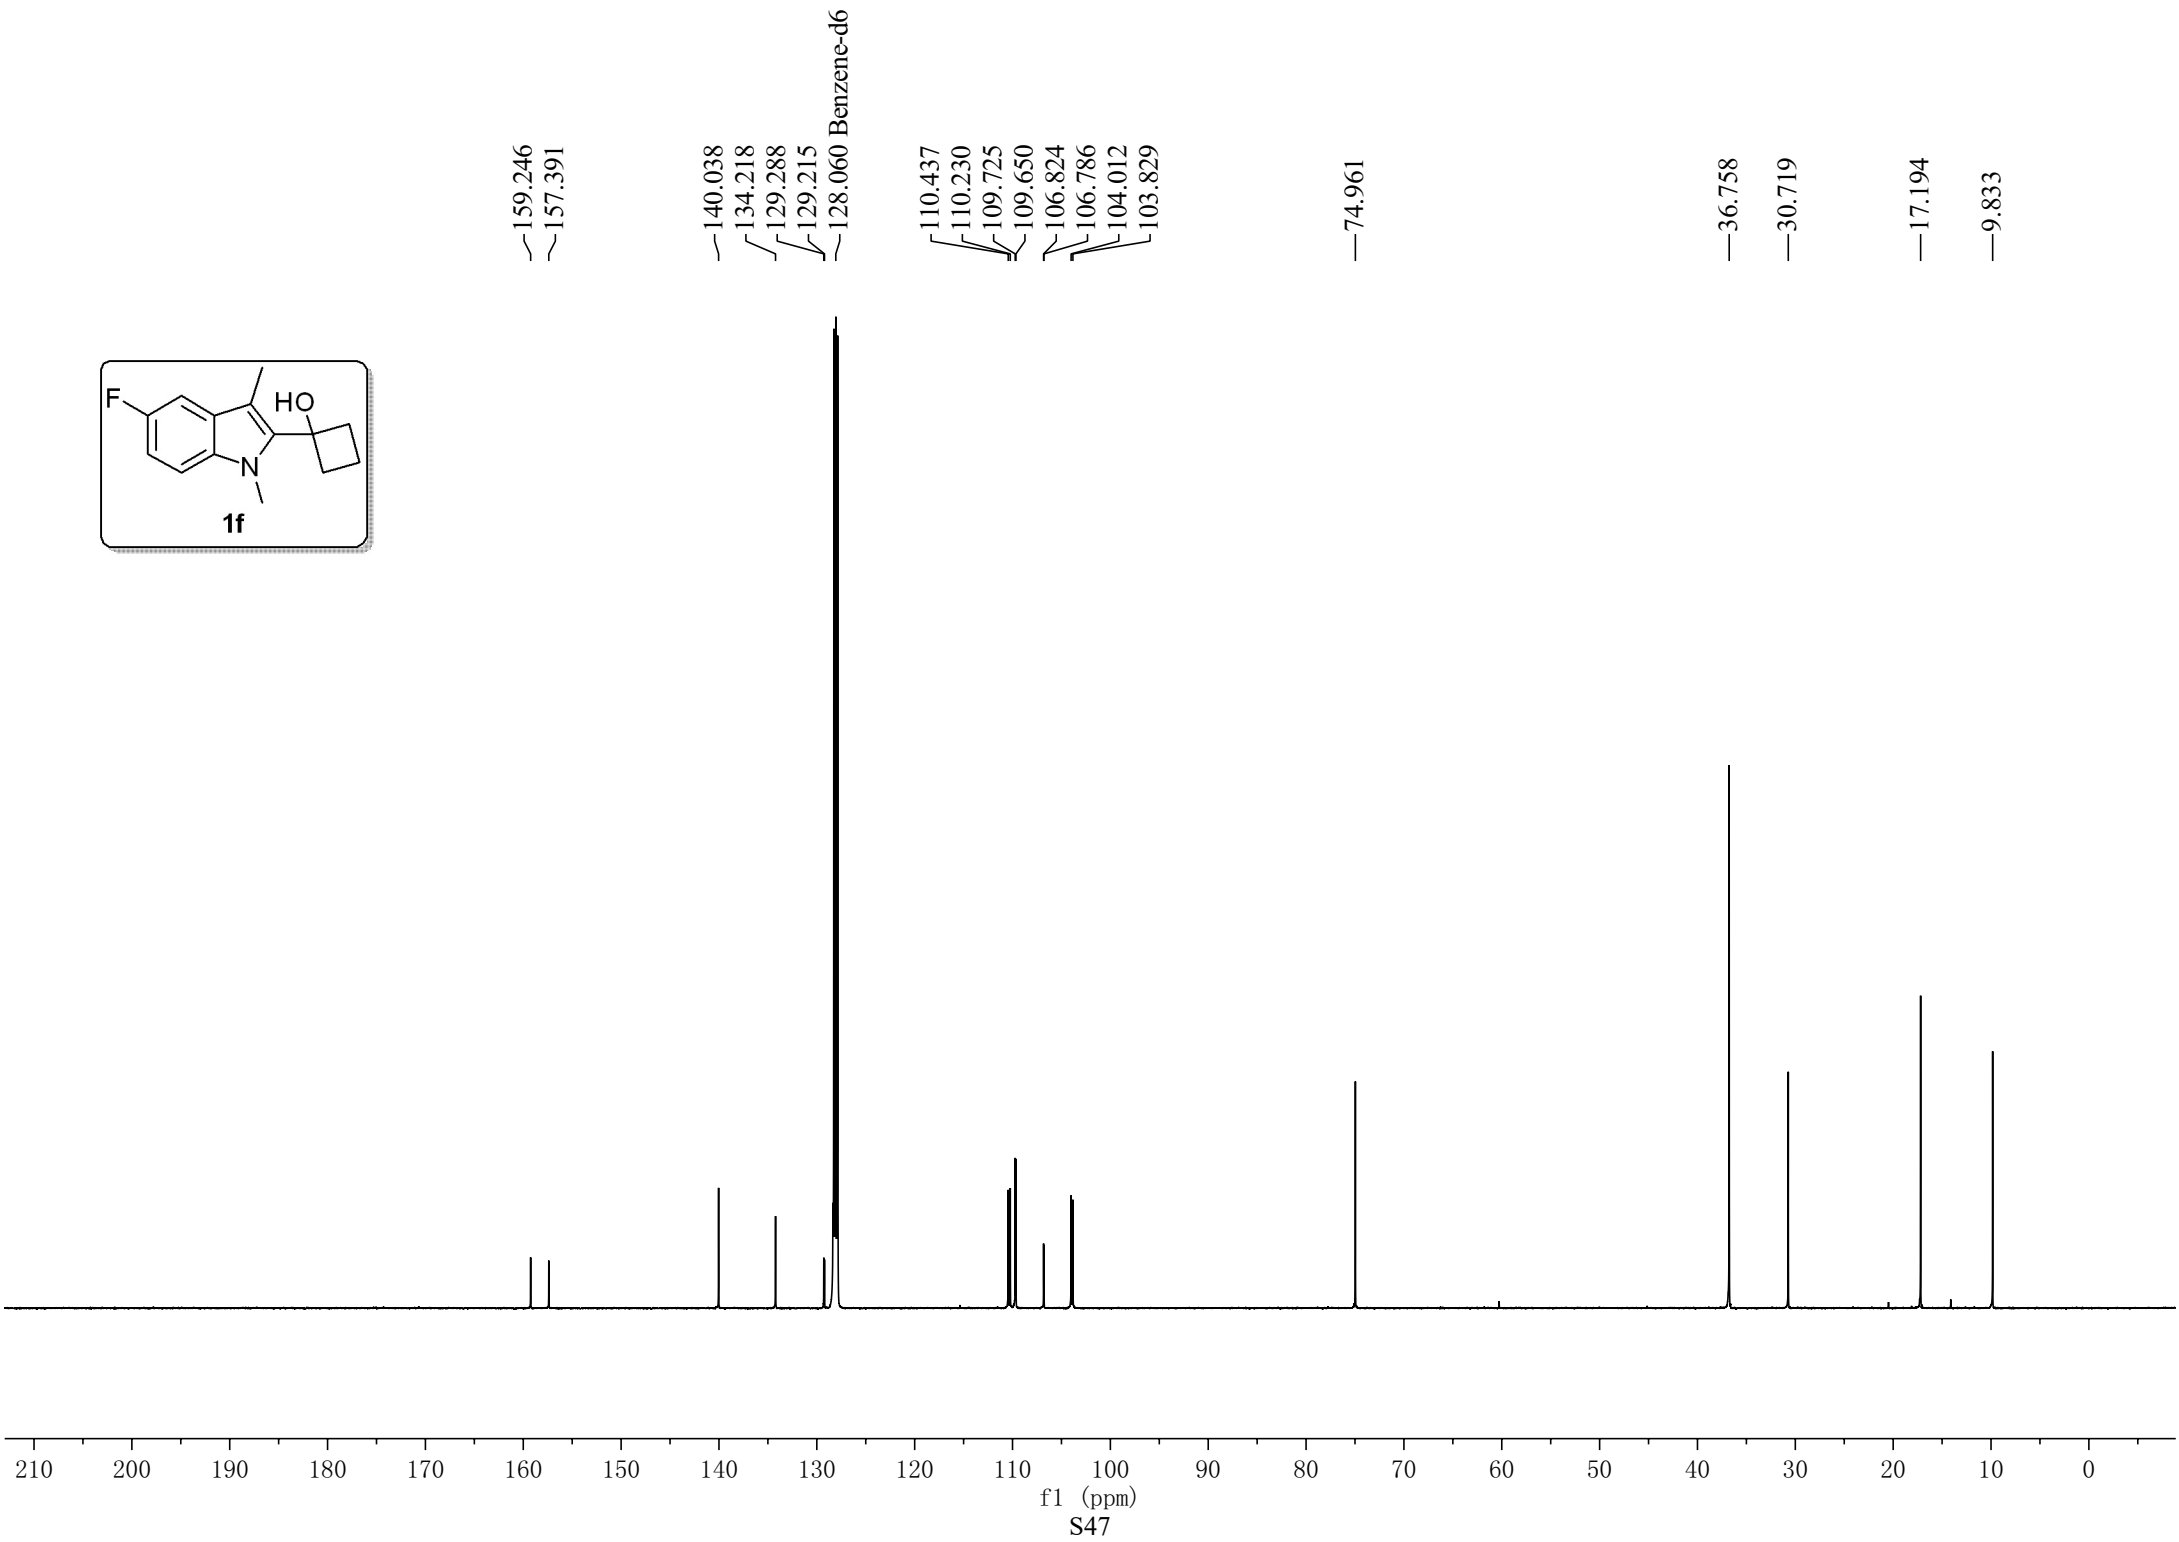

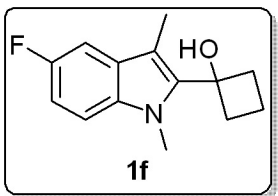

—125.448

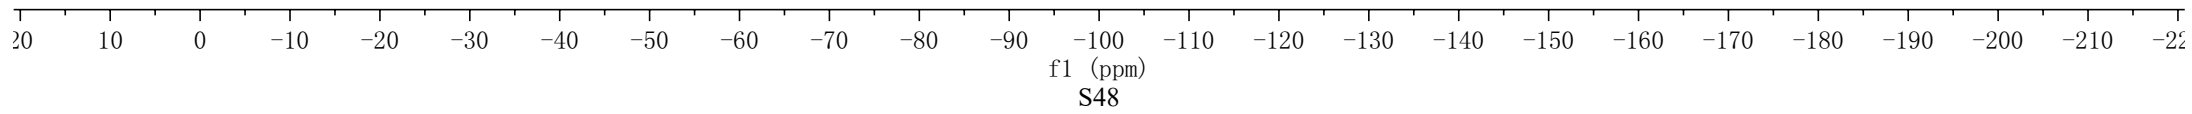

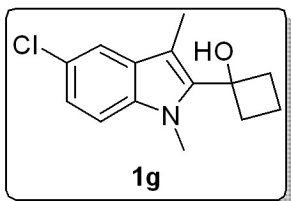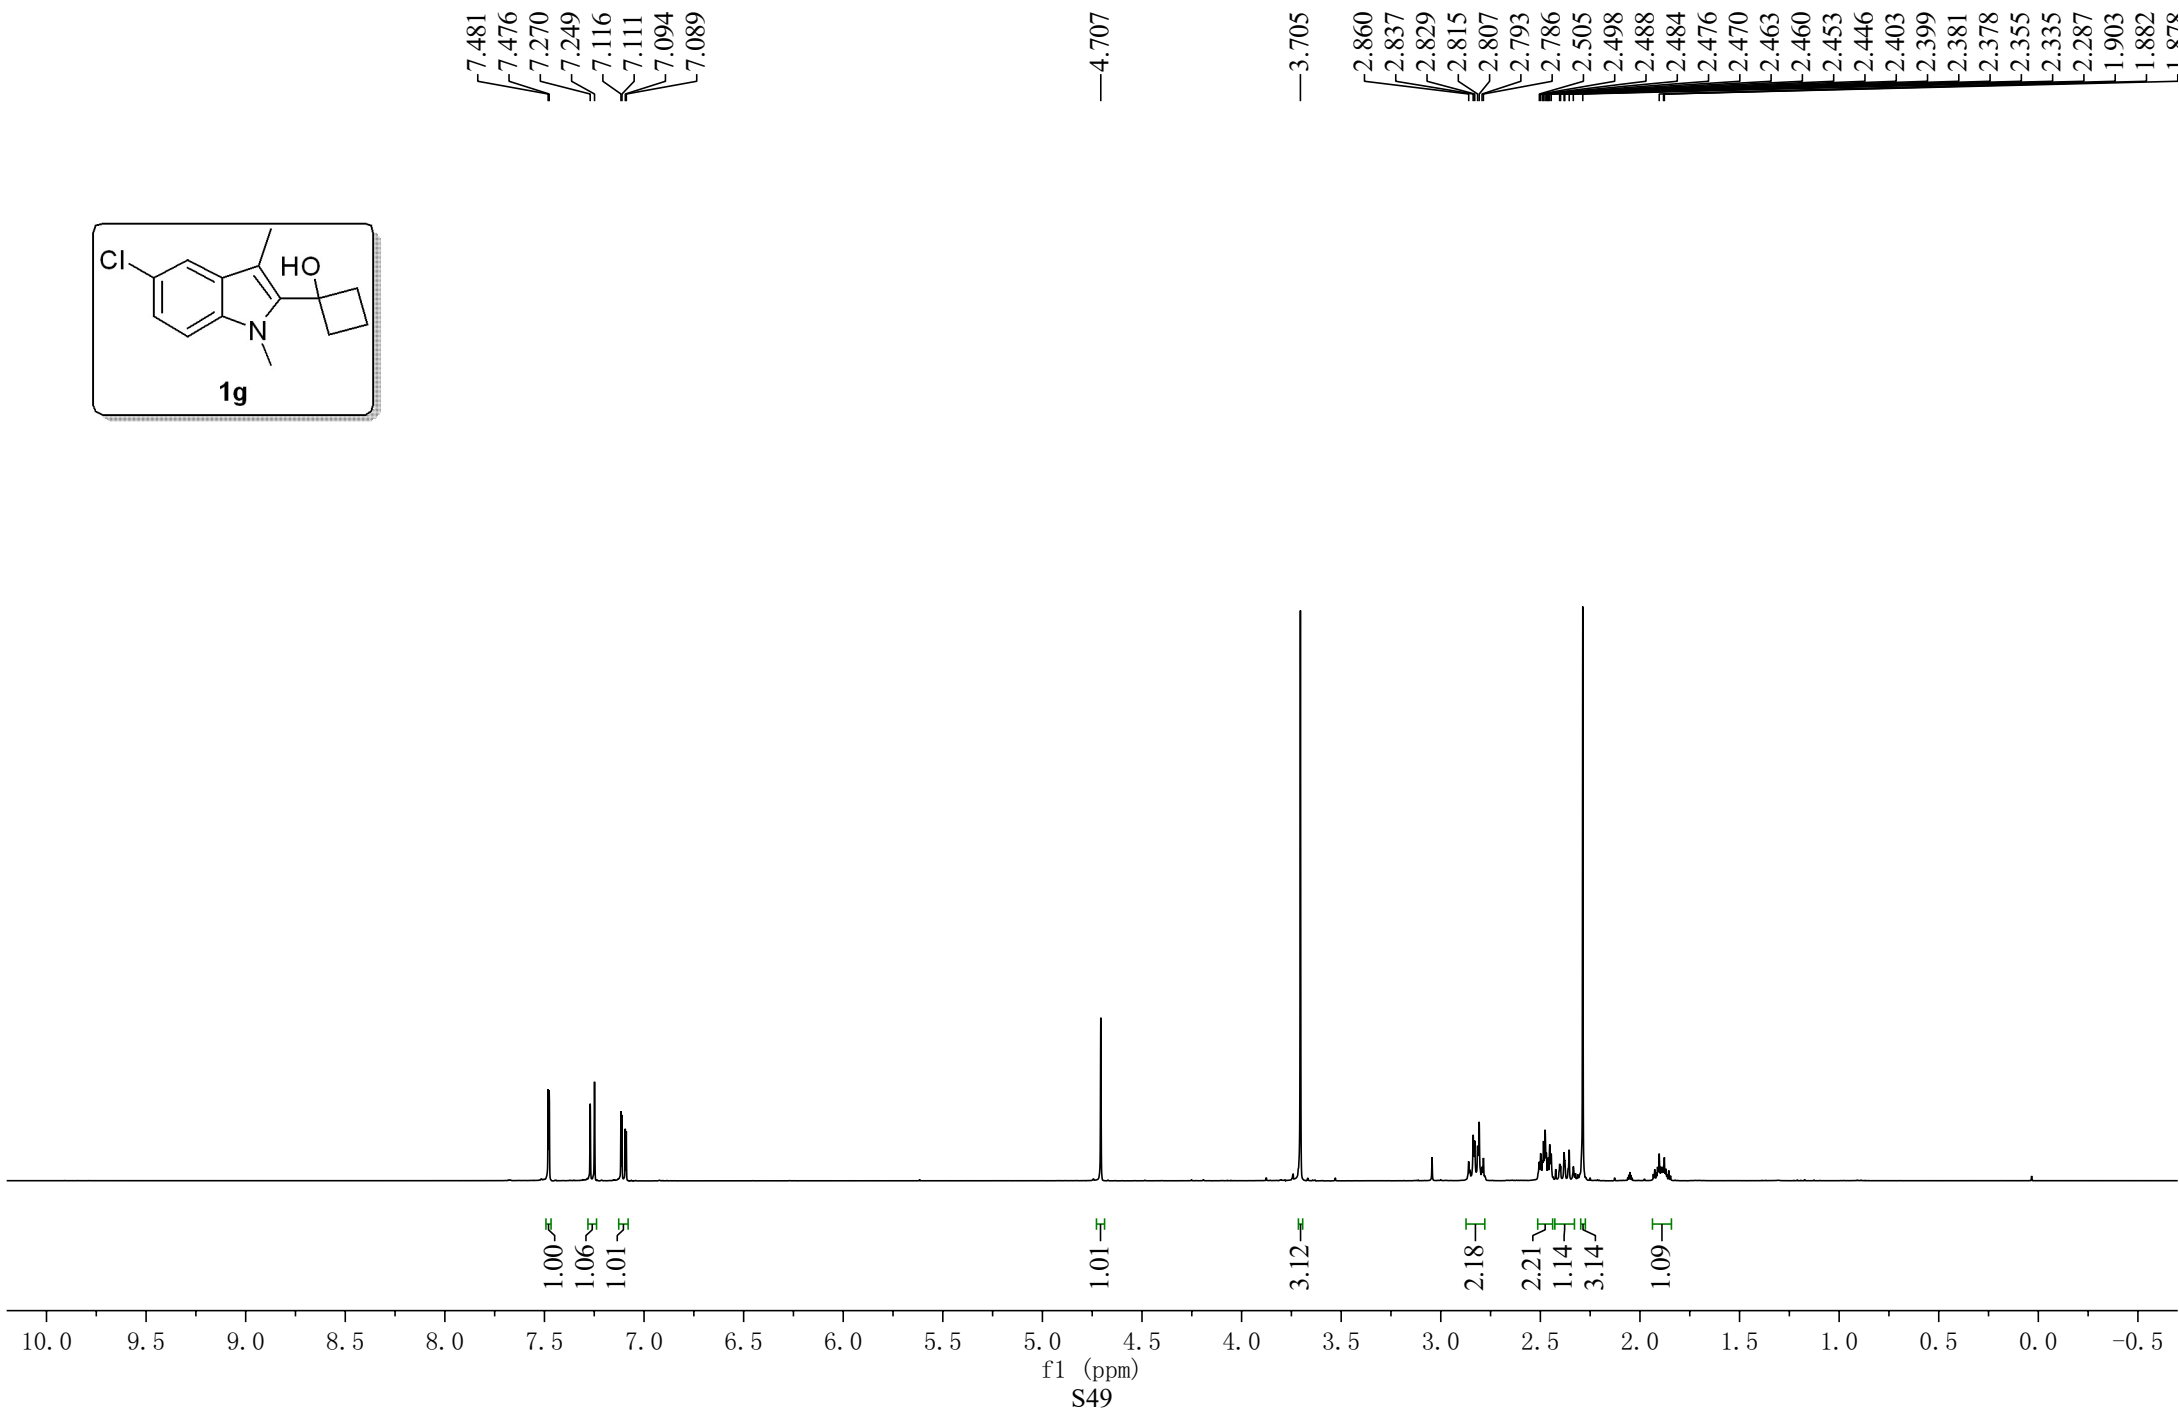

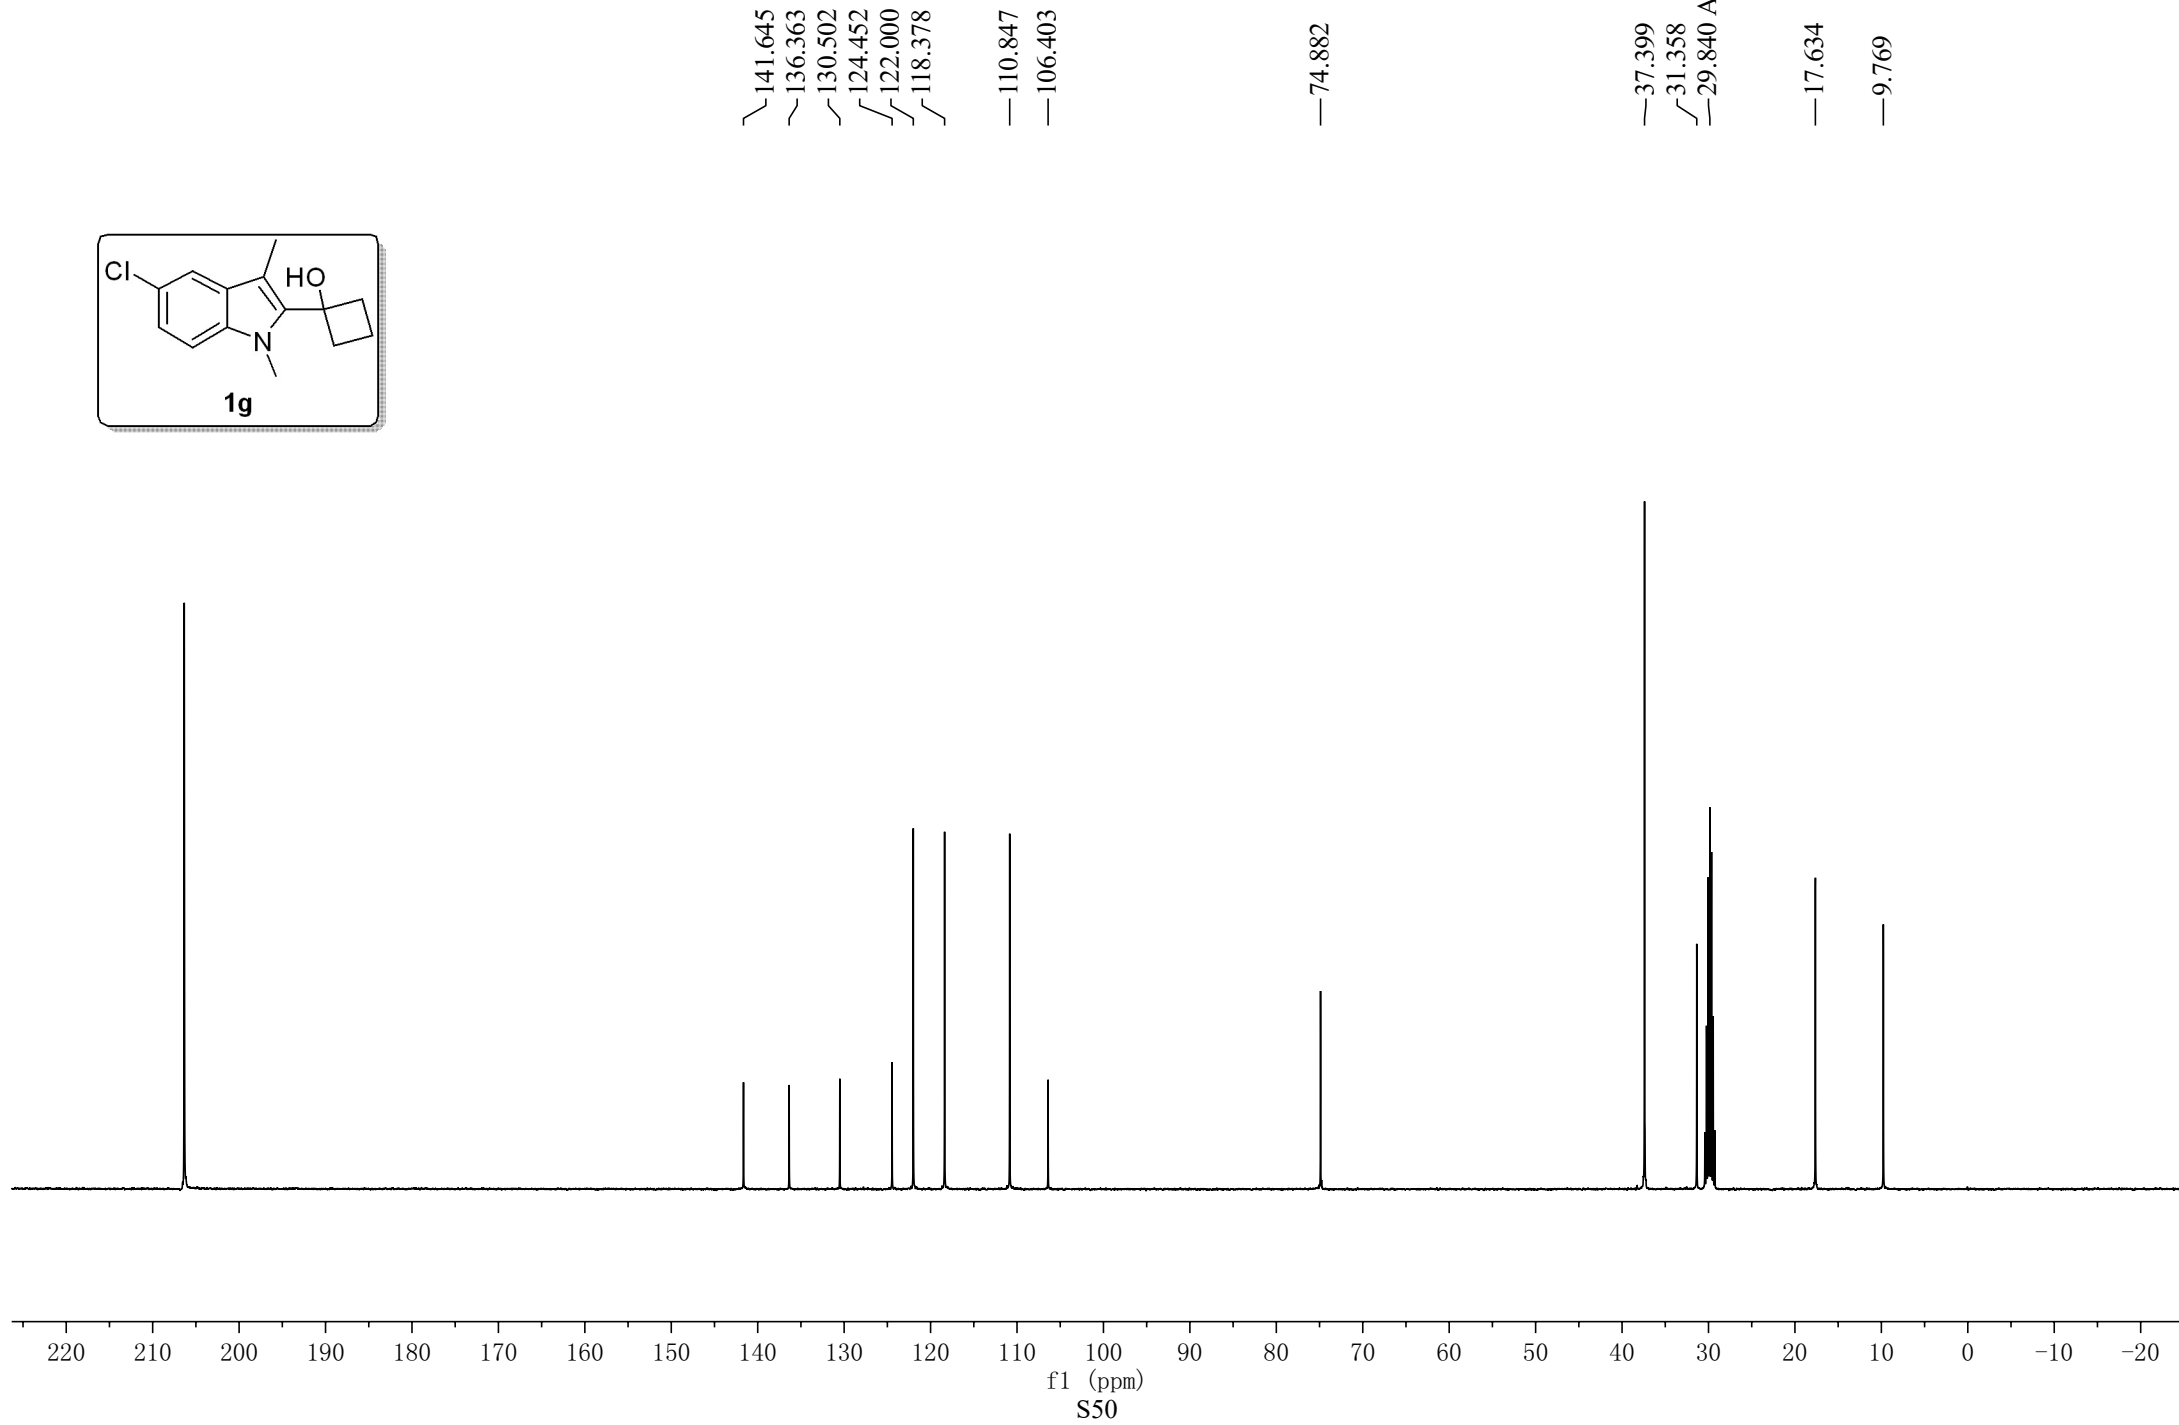

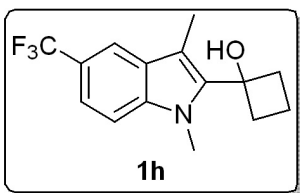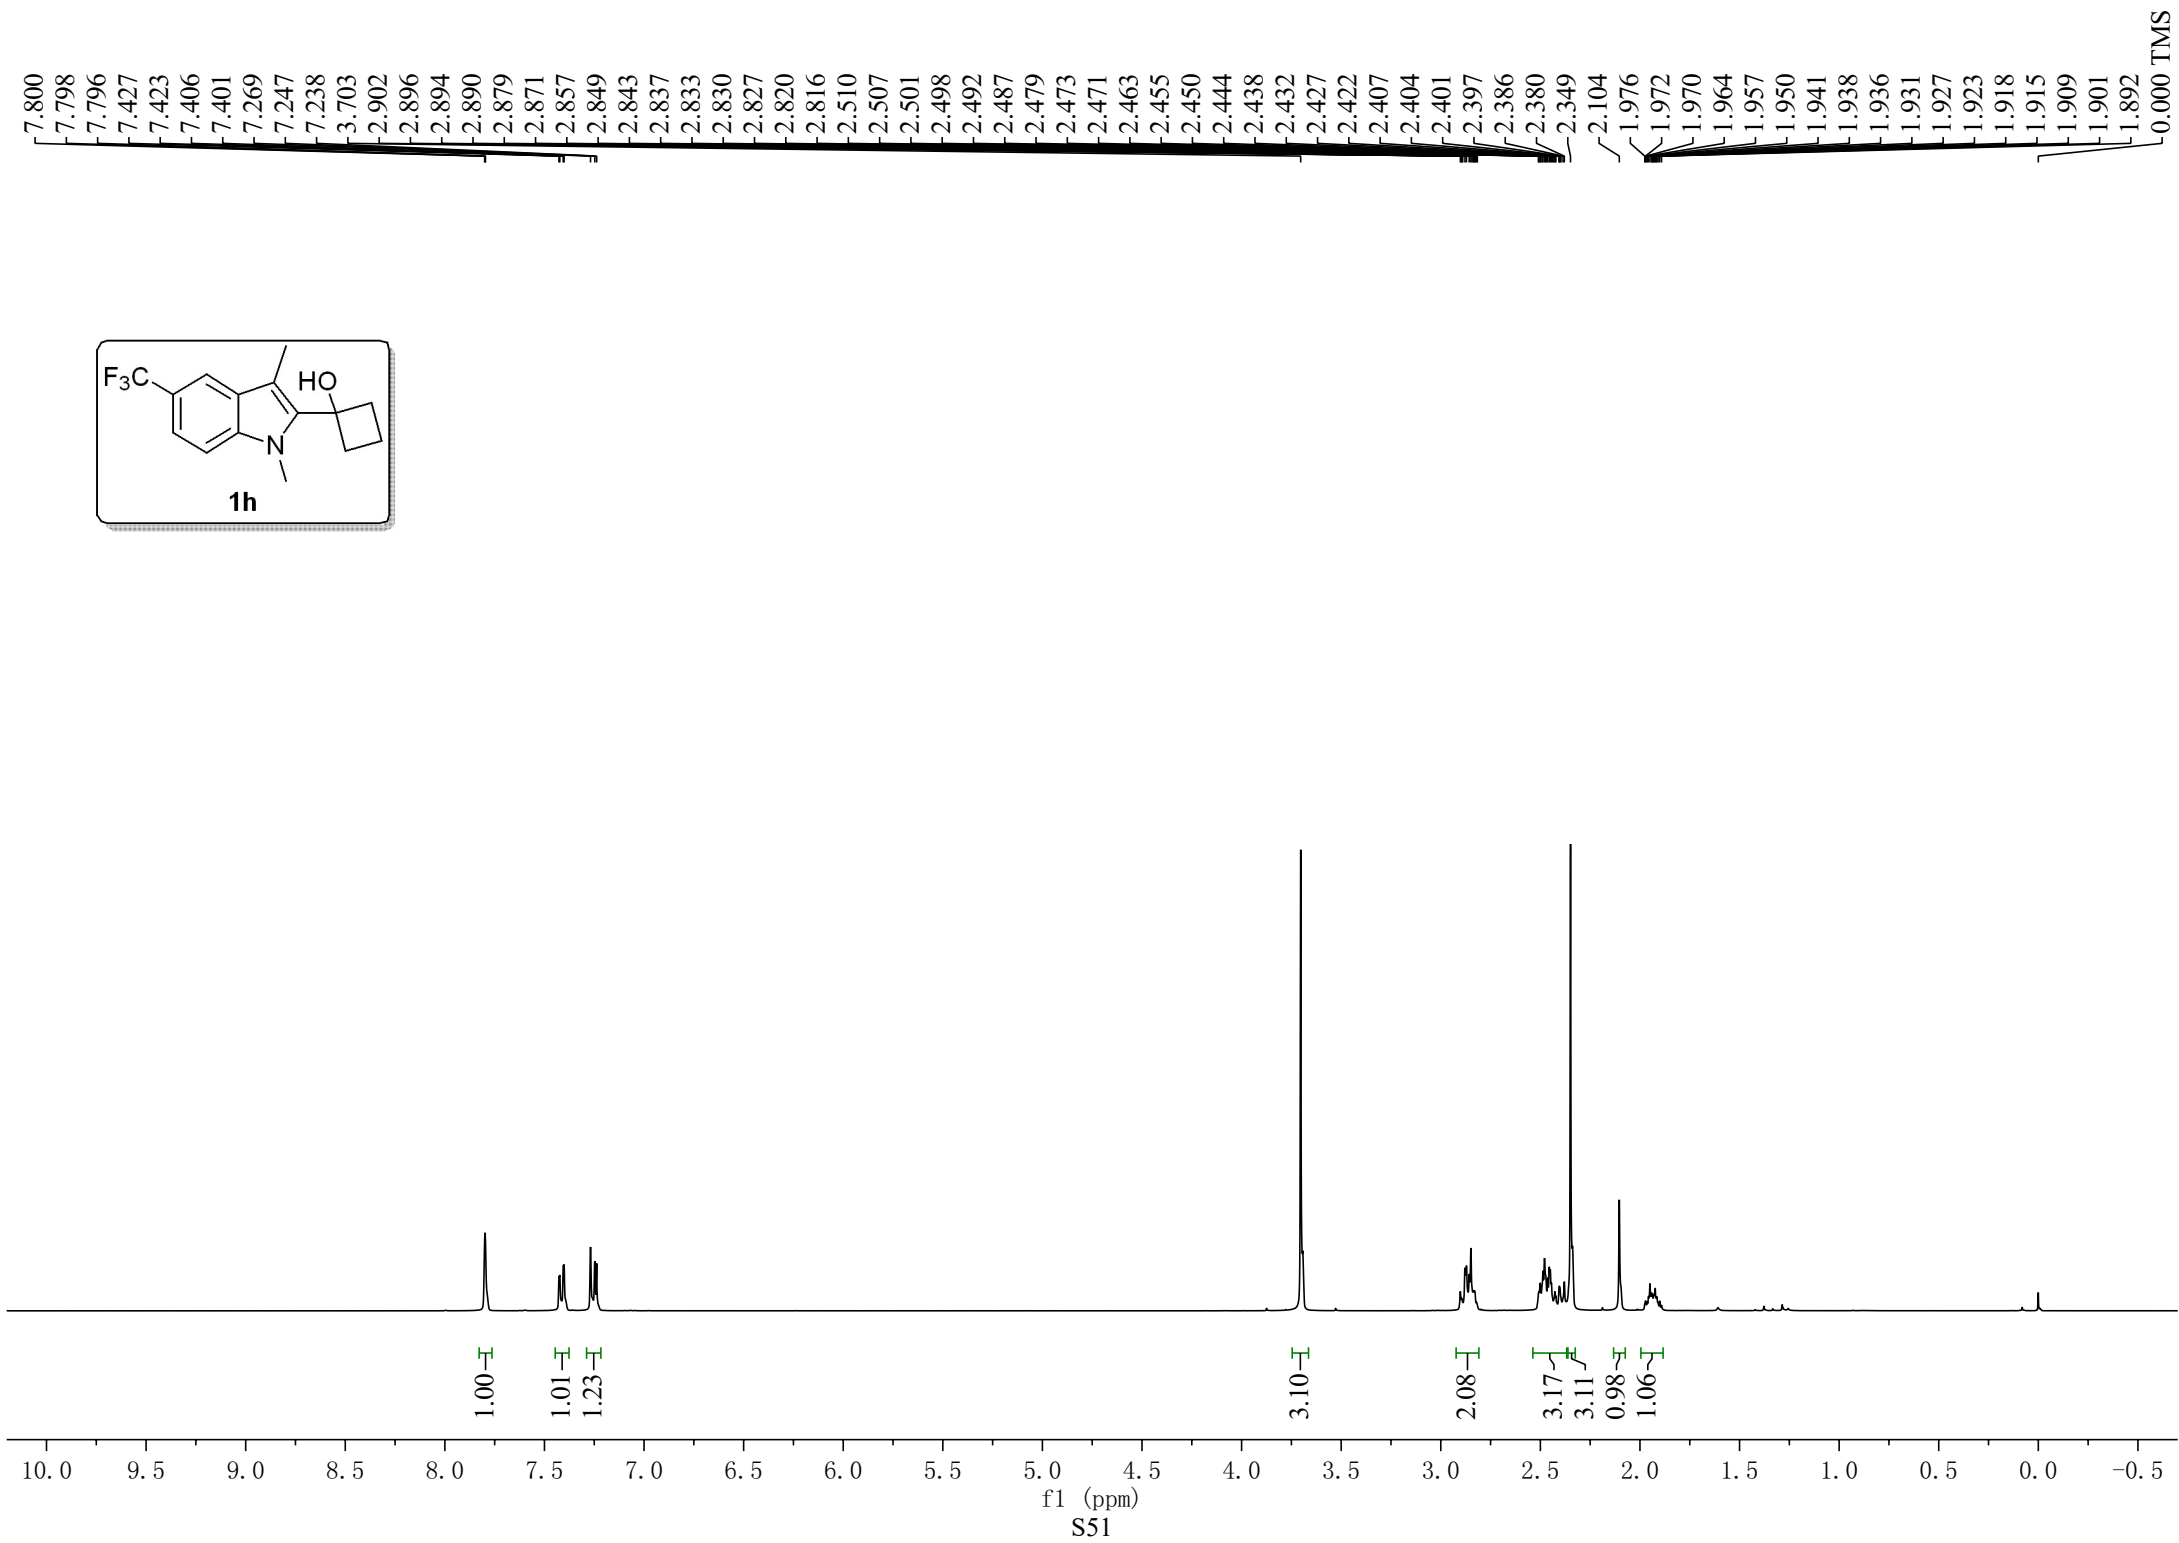

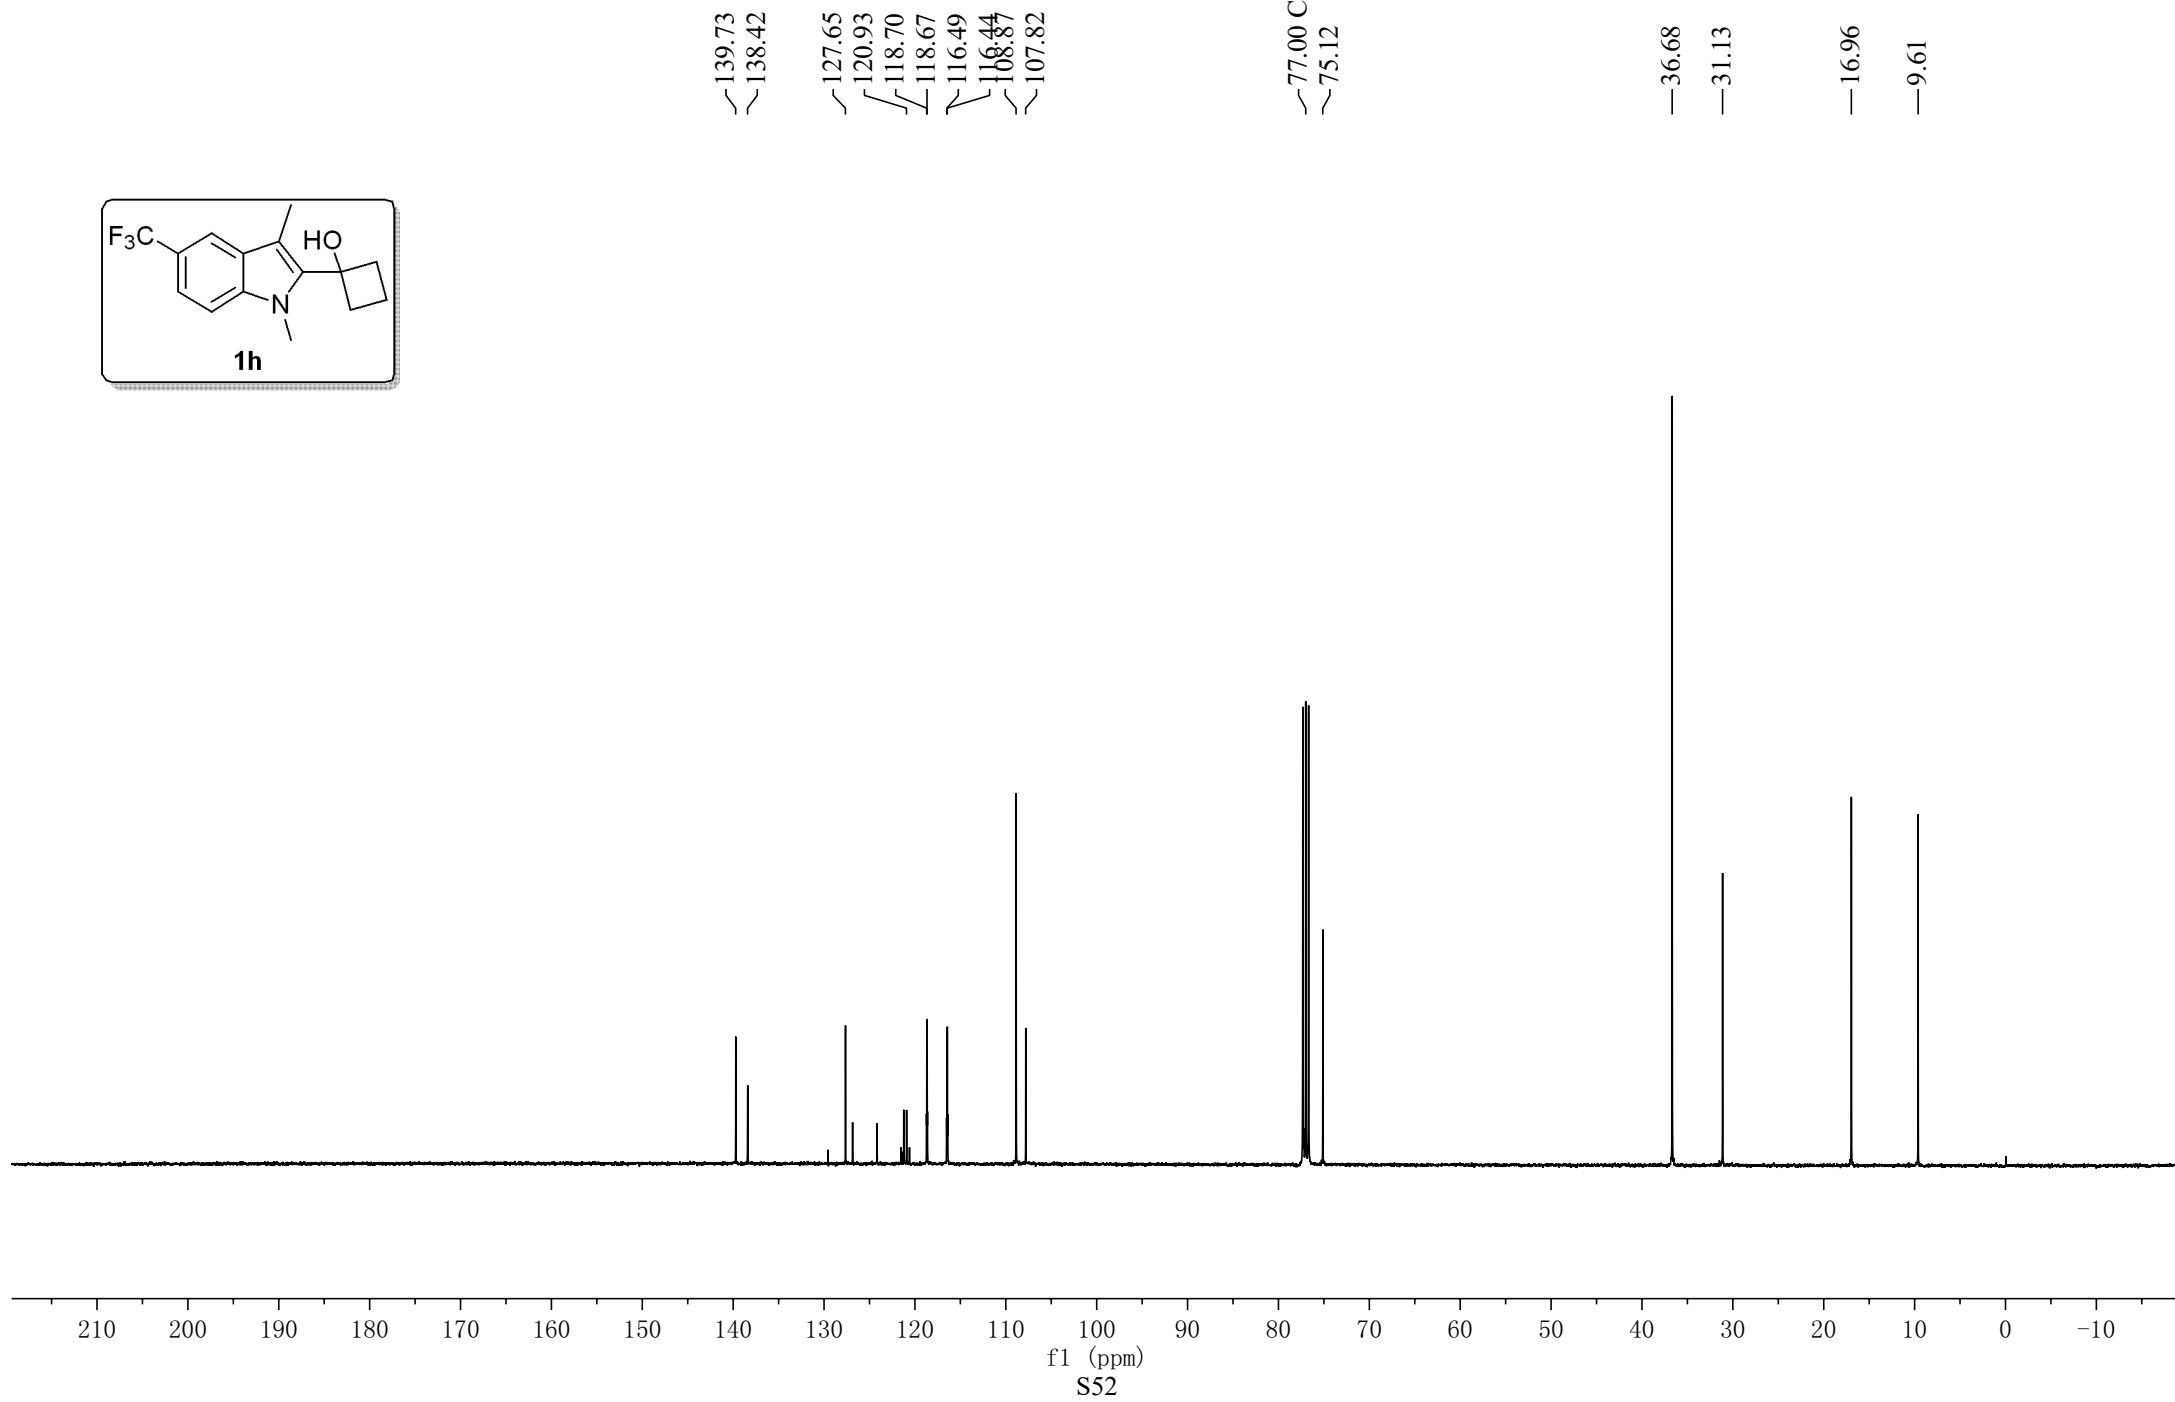





—-60.01

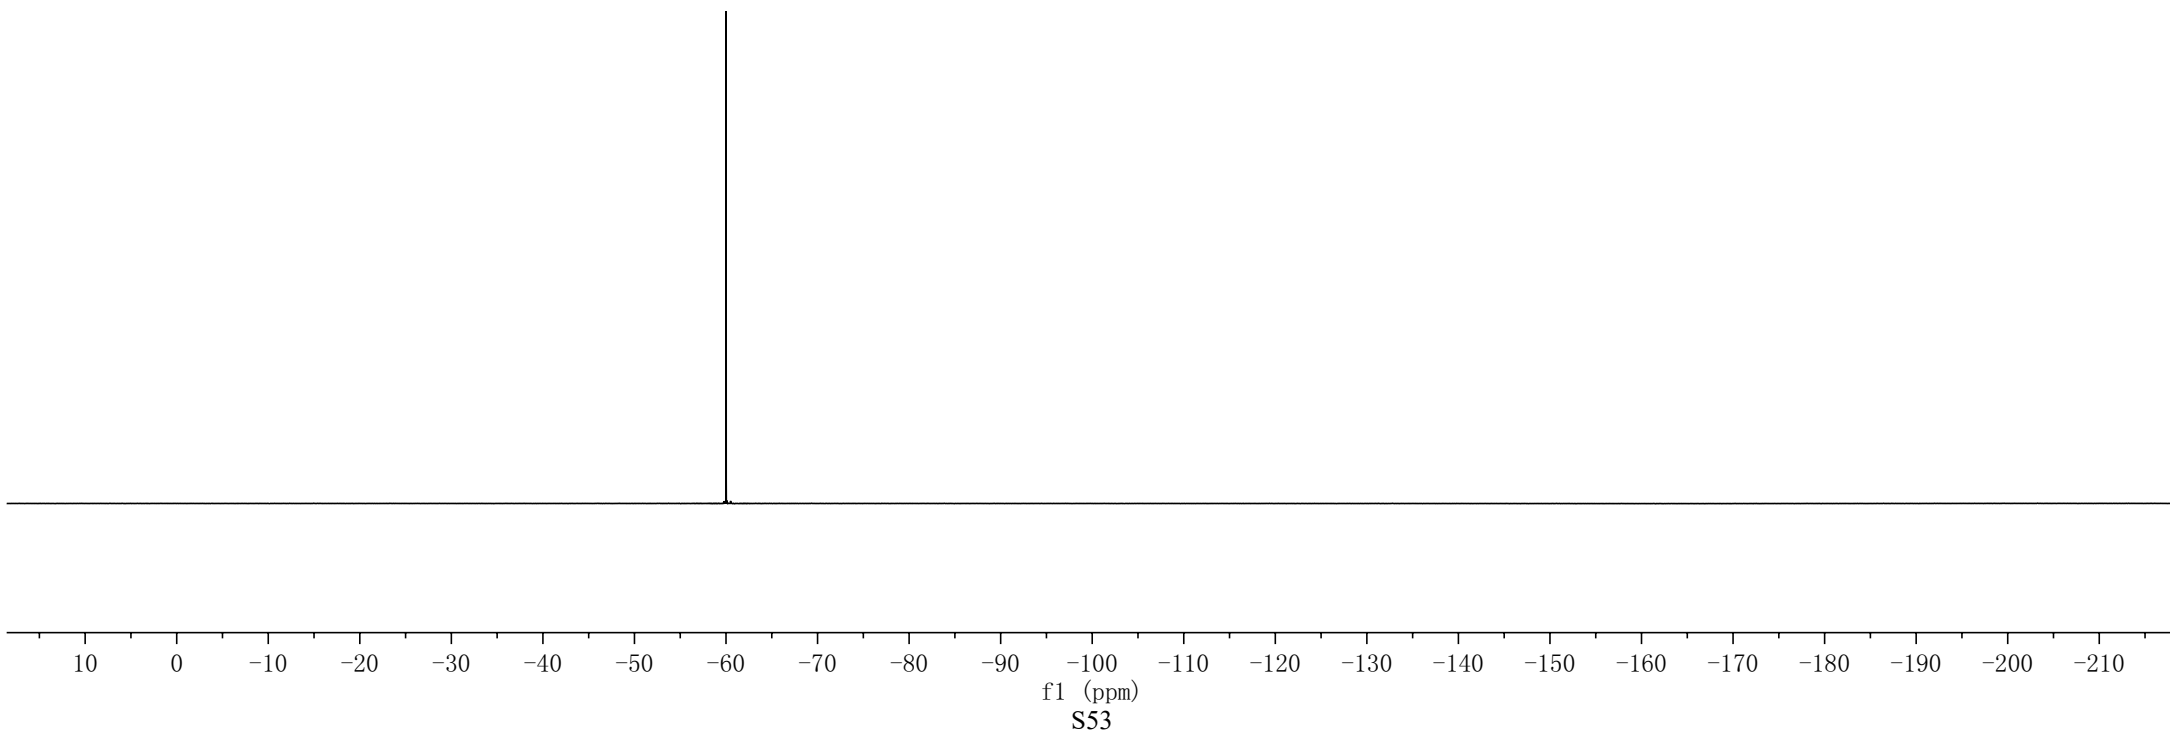

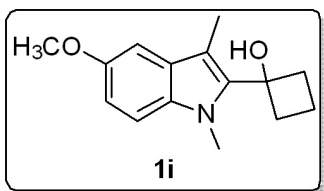

7.260 Chloroform-d  
 7.143  
 7.121  
 6.979  
 6.973  
 6.900  
 6.894  
 6.878  
 6.872

3.875  
 3.673  
 3.667

2.922  
 2.899  
 2.892  
 2.877  
 2.869

2.522  
 2.514  
 2.501  
 2.491  
 2.476  
 2.468  
 2.462  
 2.452  
 2.433  
 2.428  
 2.412  
 2.410  
 2.407  
 2.385  
 2.364  
 2.324  
 1.960  
 1.952  
 1.944  
 1.930  
 1.076

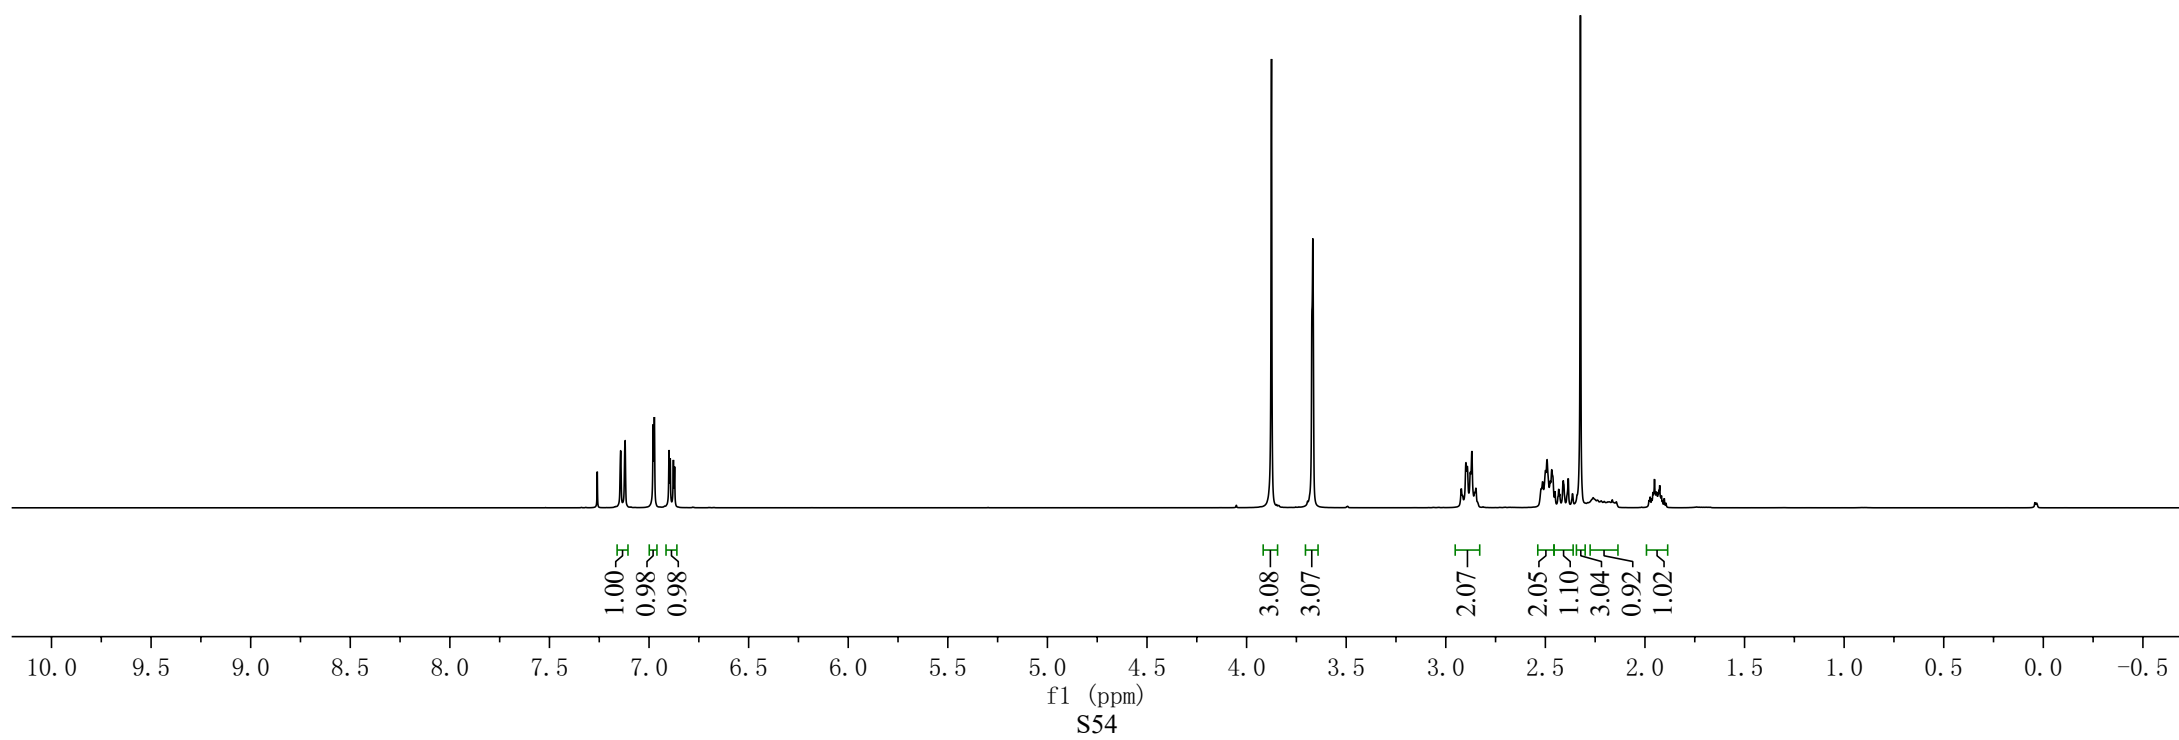

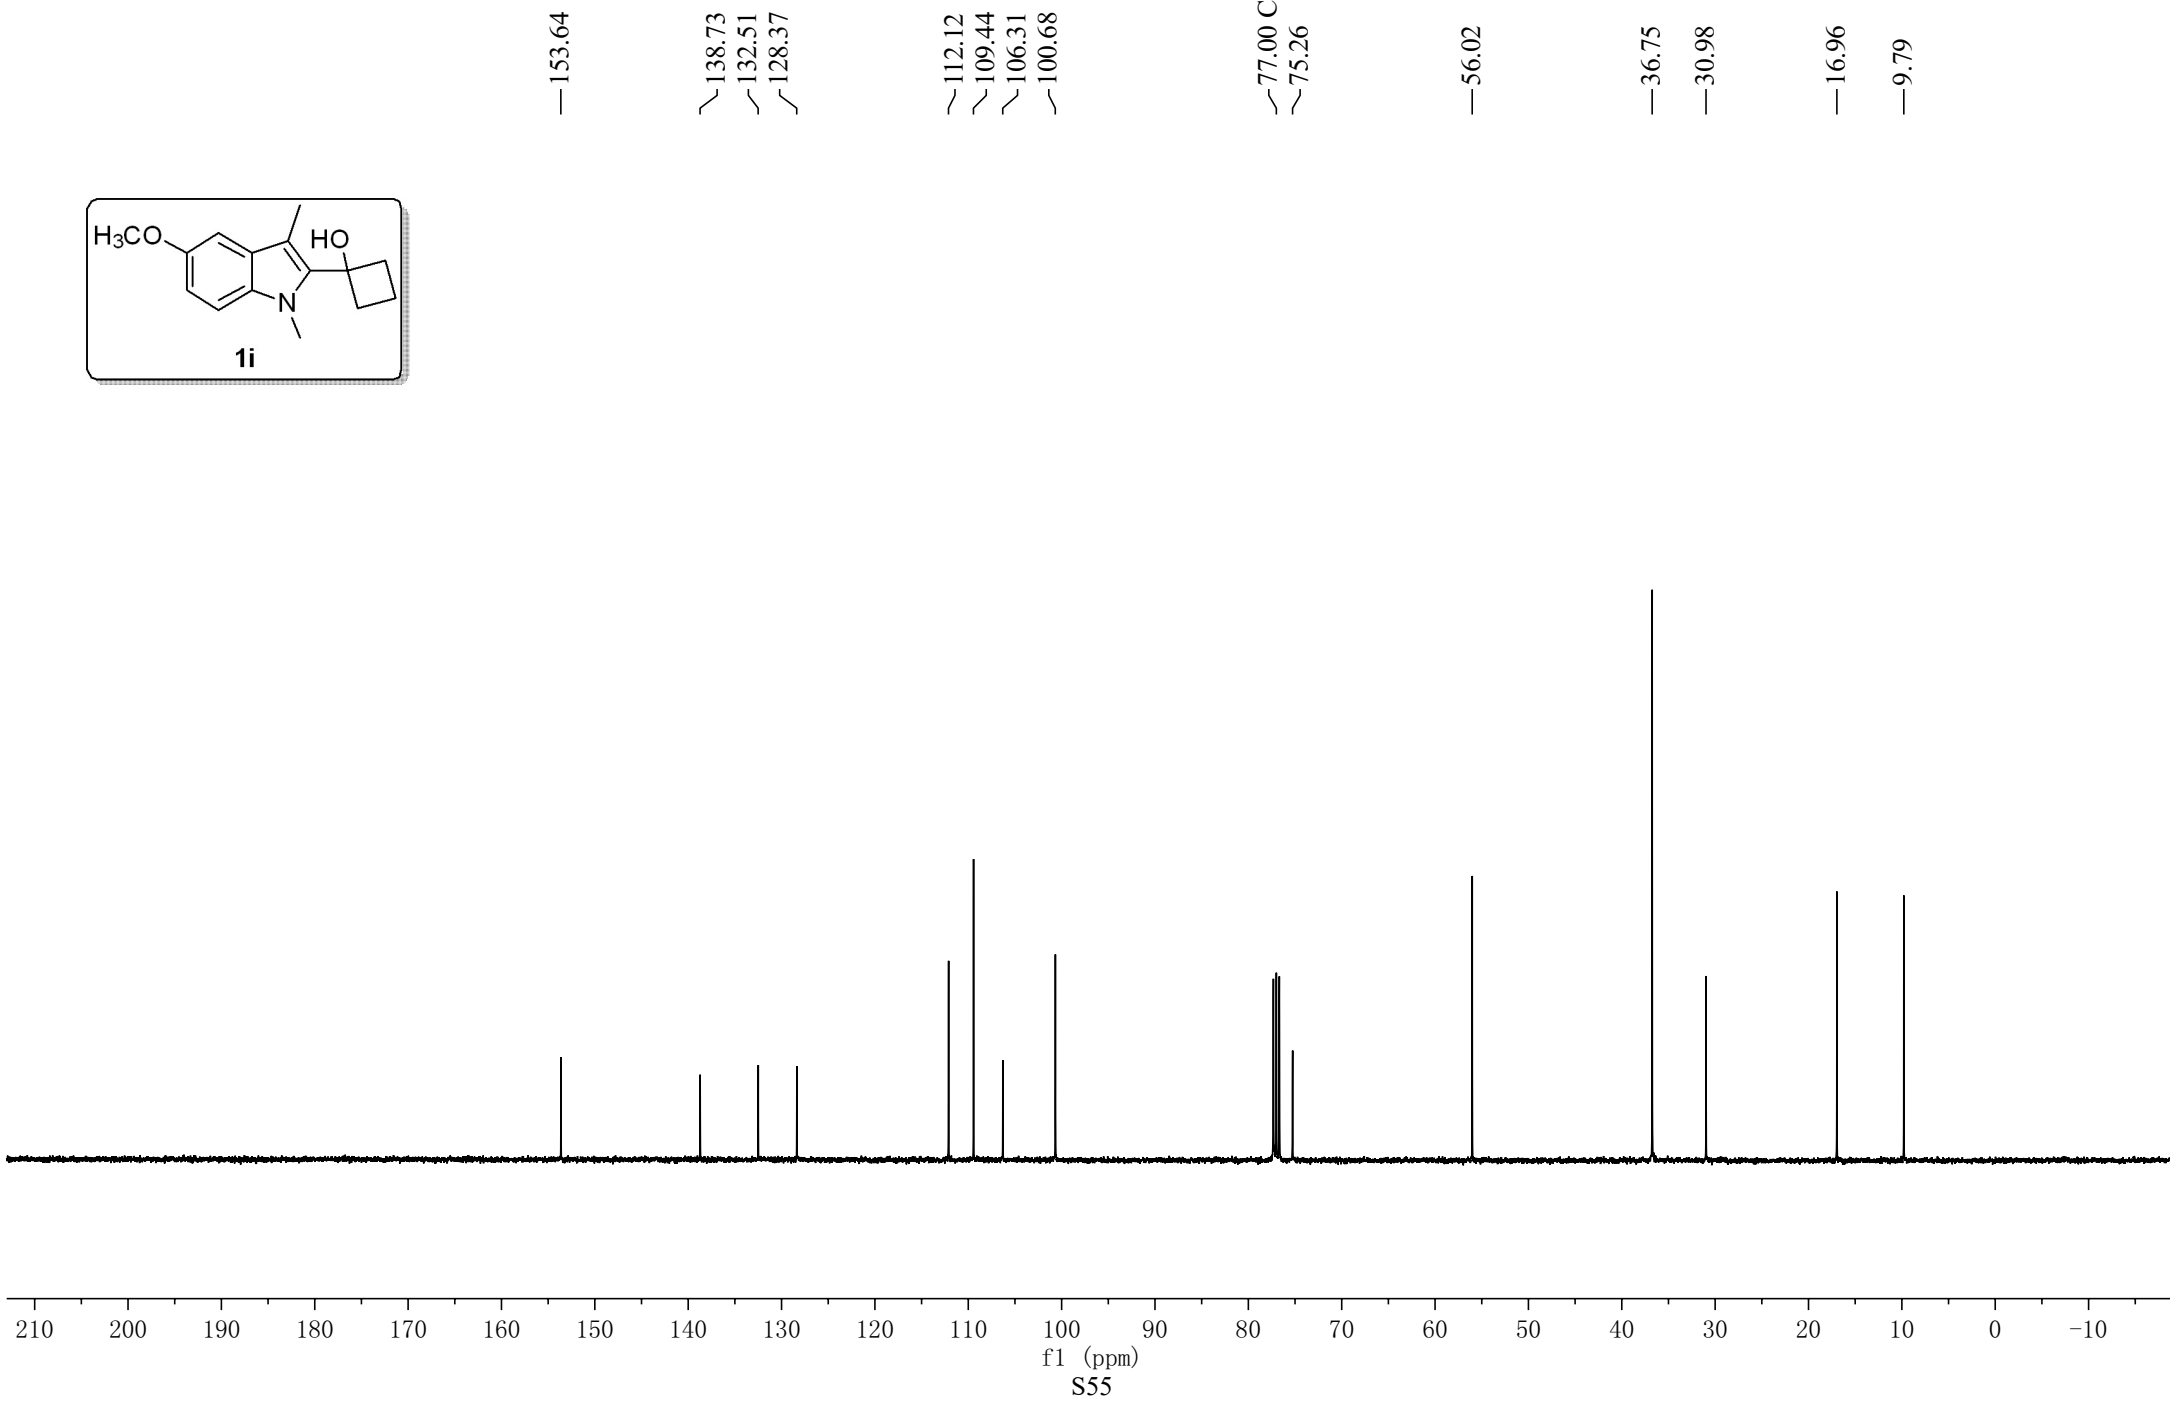

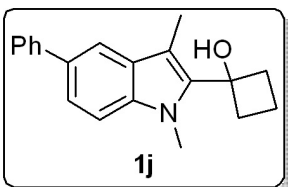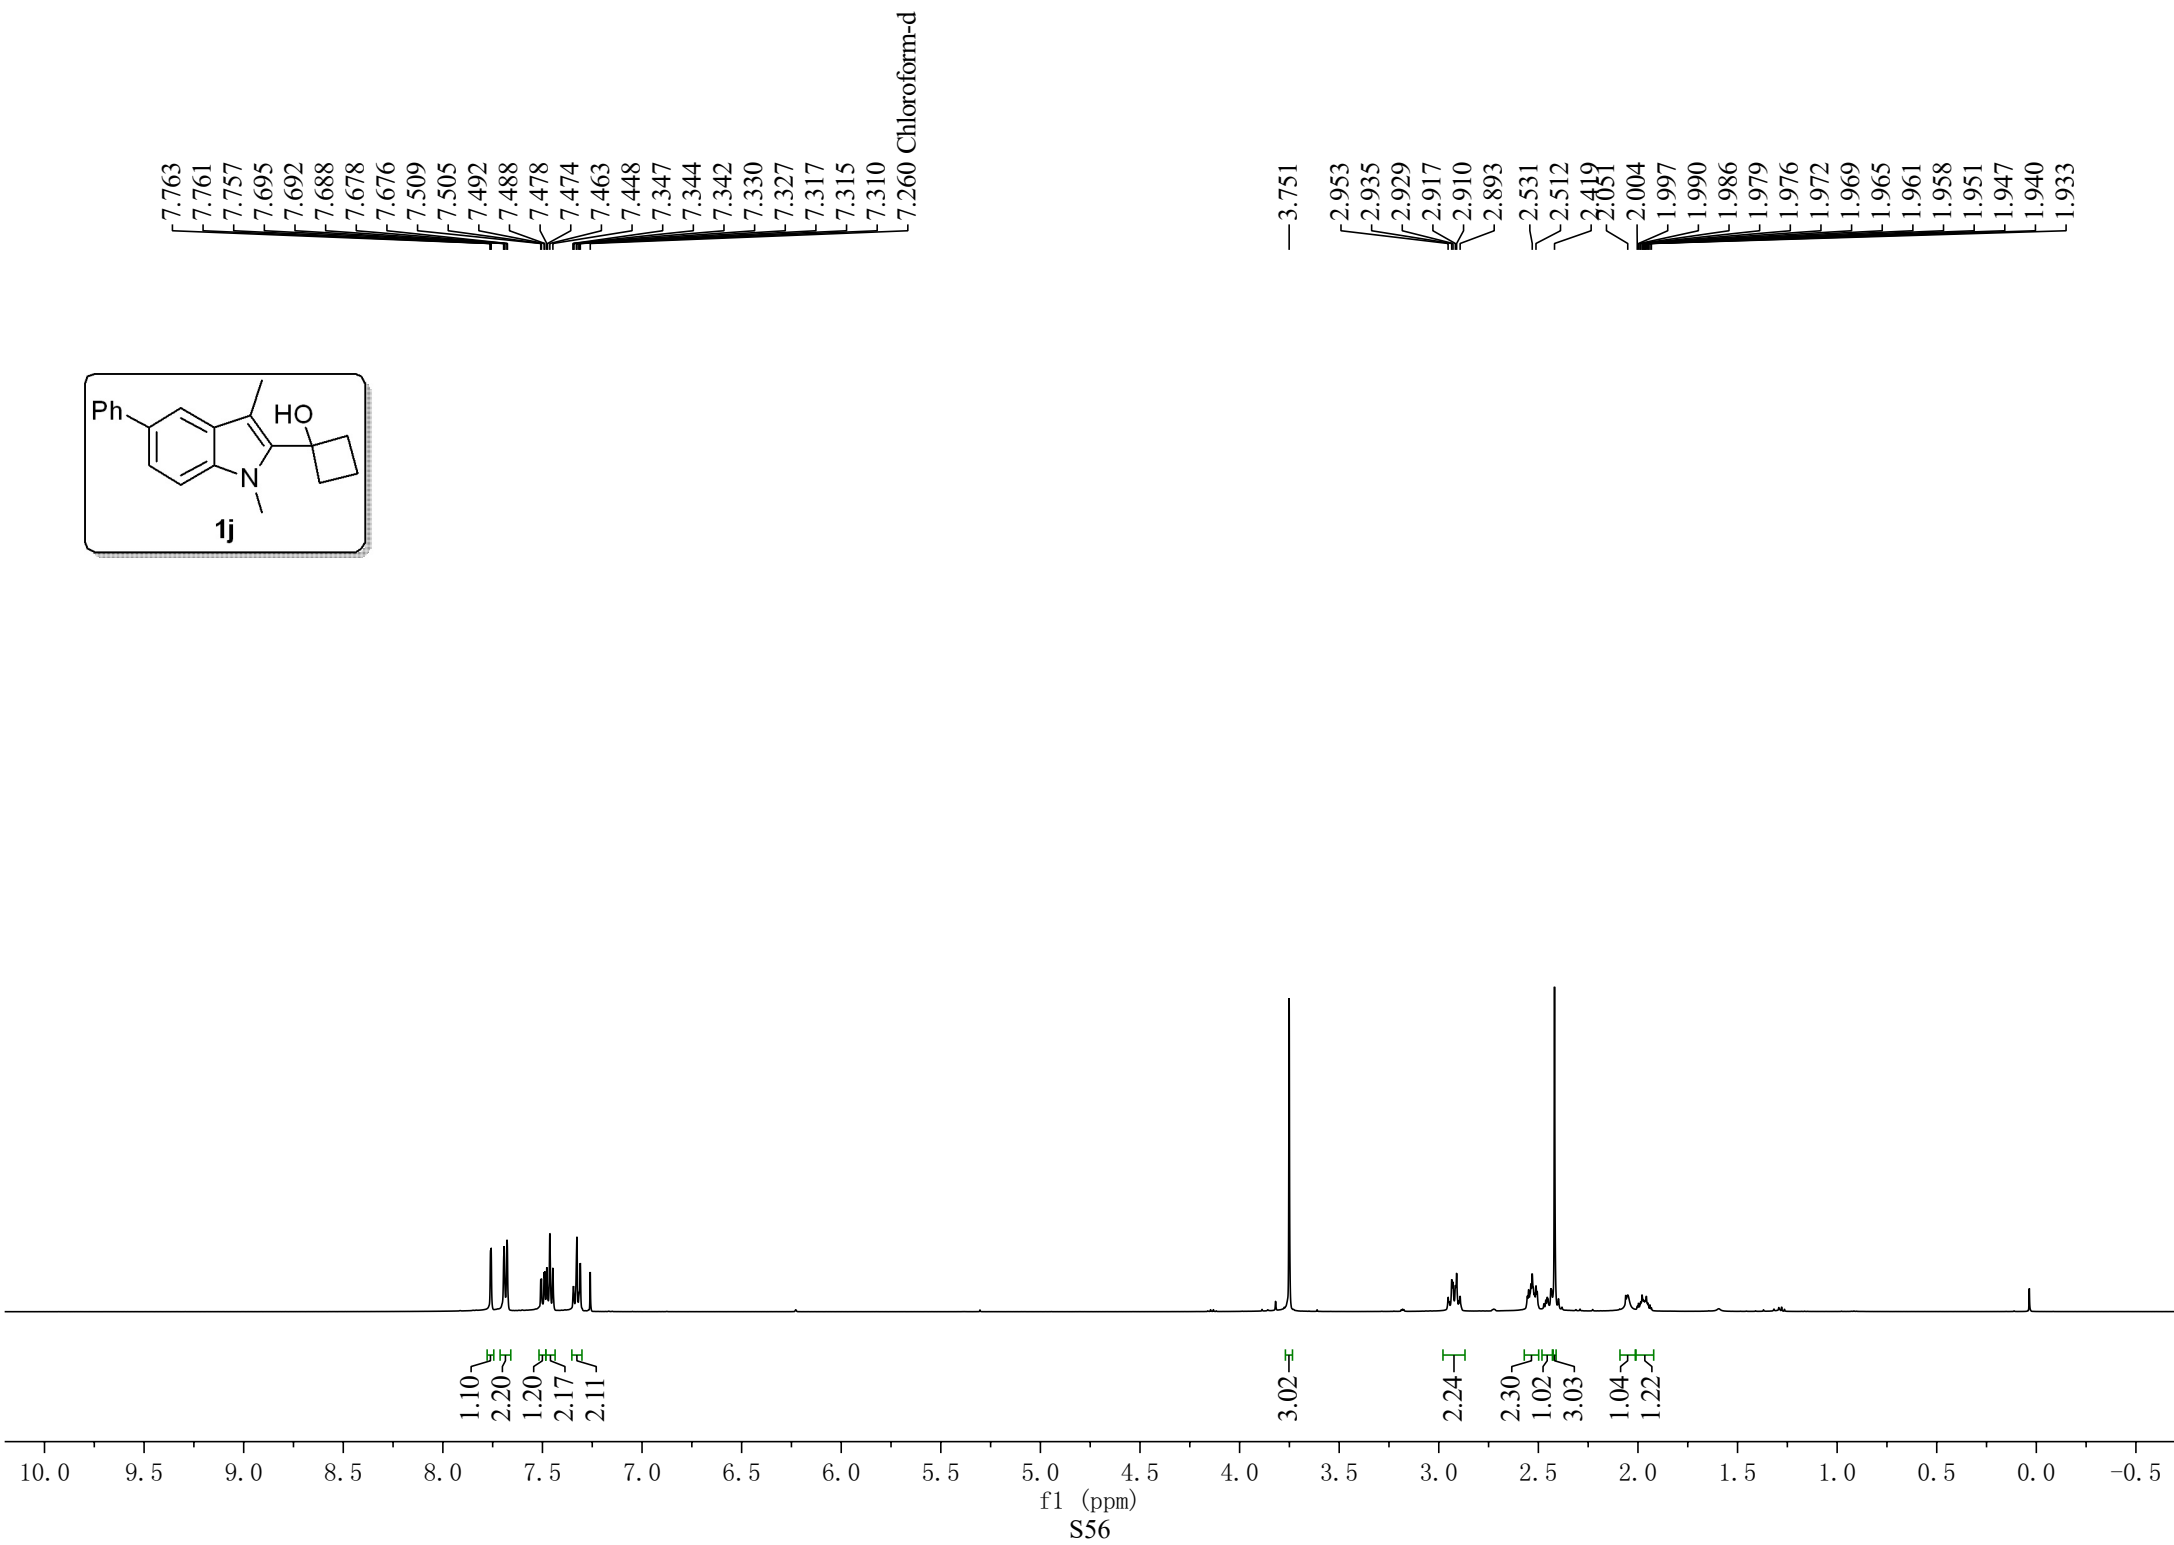

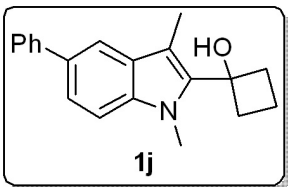

142.71  
138.74  
136.75  
132.39  
128.69  
128.59  
127.30  
126.15  
121.89  
117.27  
108.96  
107.24

77.00 Chloroform-d  
75.32

36.77  
31.07  
16.98  
9.78

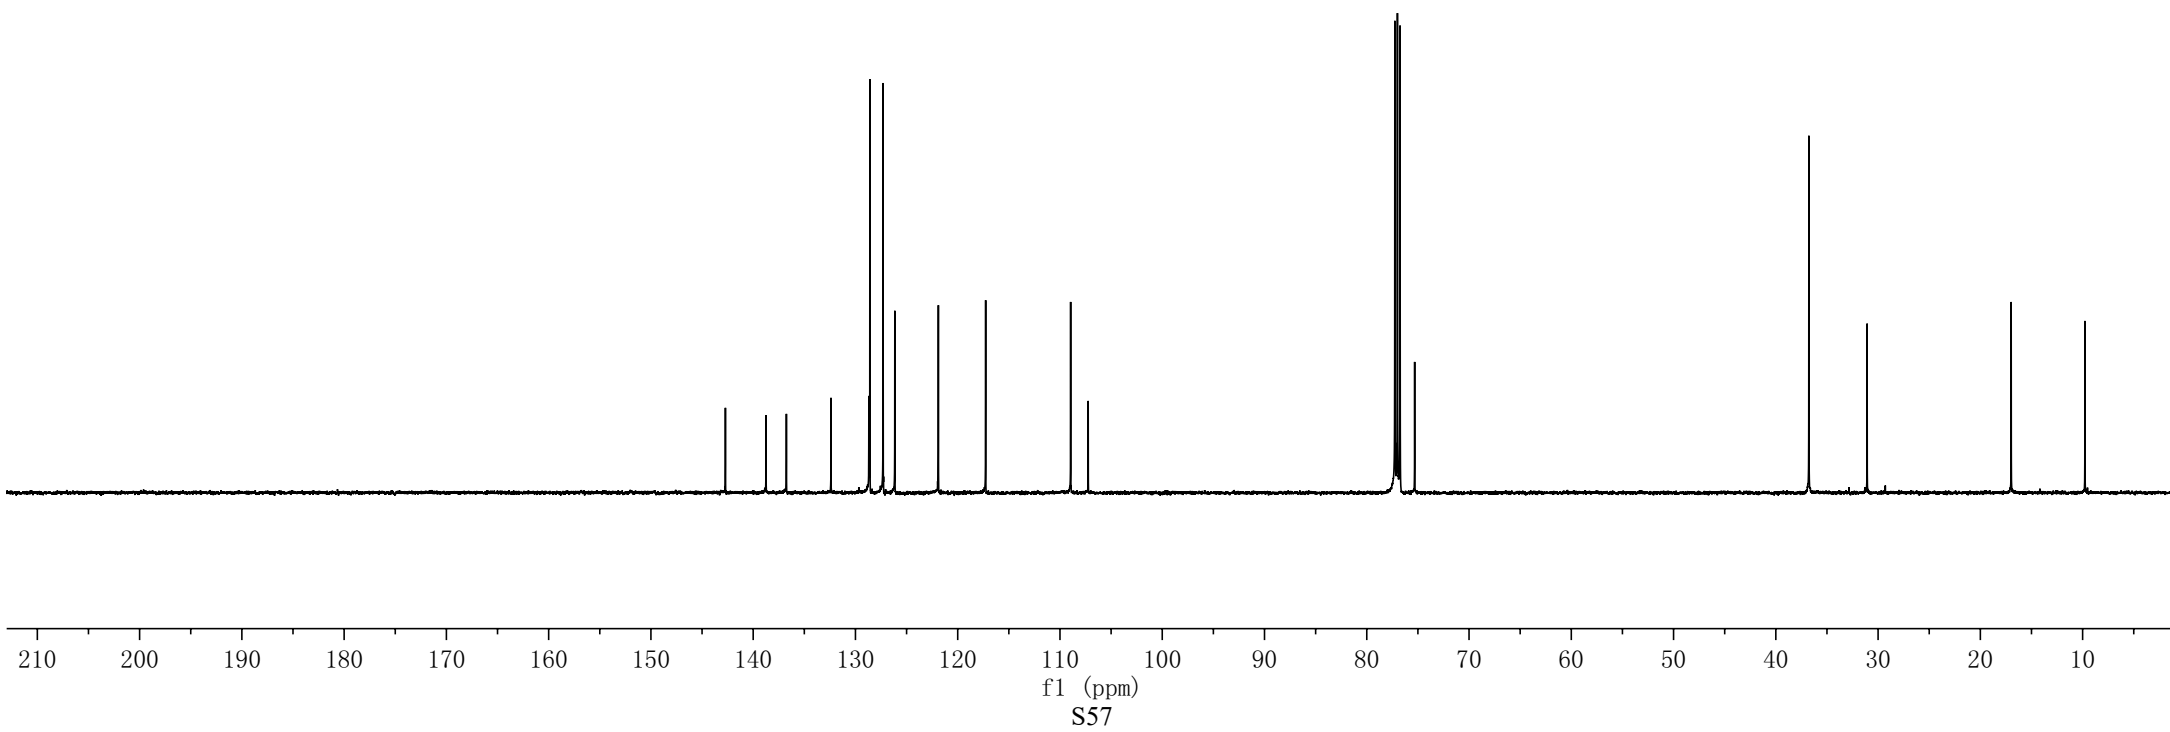

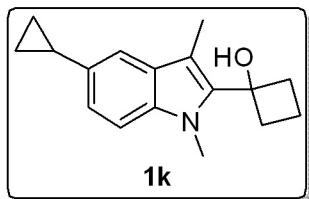

7.444  
7.434 Benzene-d6  
7.160  
7.083  
7.066  
6.978  
6.961

3.233  
2.516  
2.498  
2.244  
2.220  
2.208  
2.193  
2.173  
2.048  
1.655  
1.636  
1.632  
0.876  
0.872  
0.865  
0.859  
0.856  
0.848  
0.813  
0.805  
0.802  
0.795  
0.792  
0.787

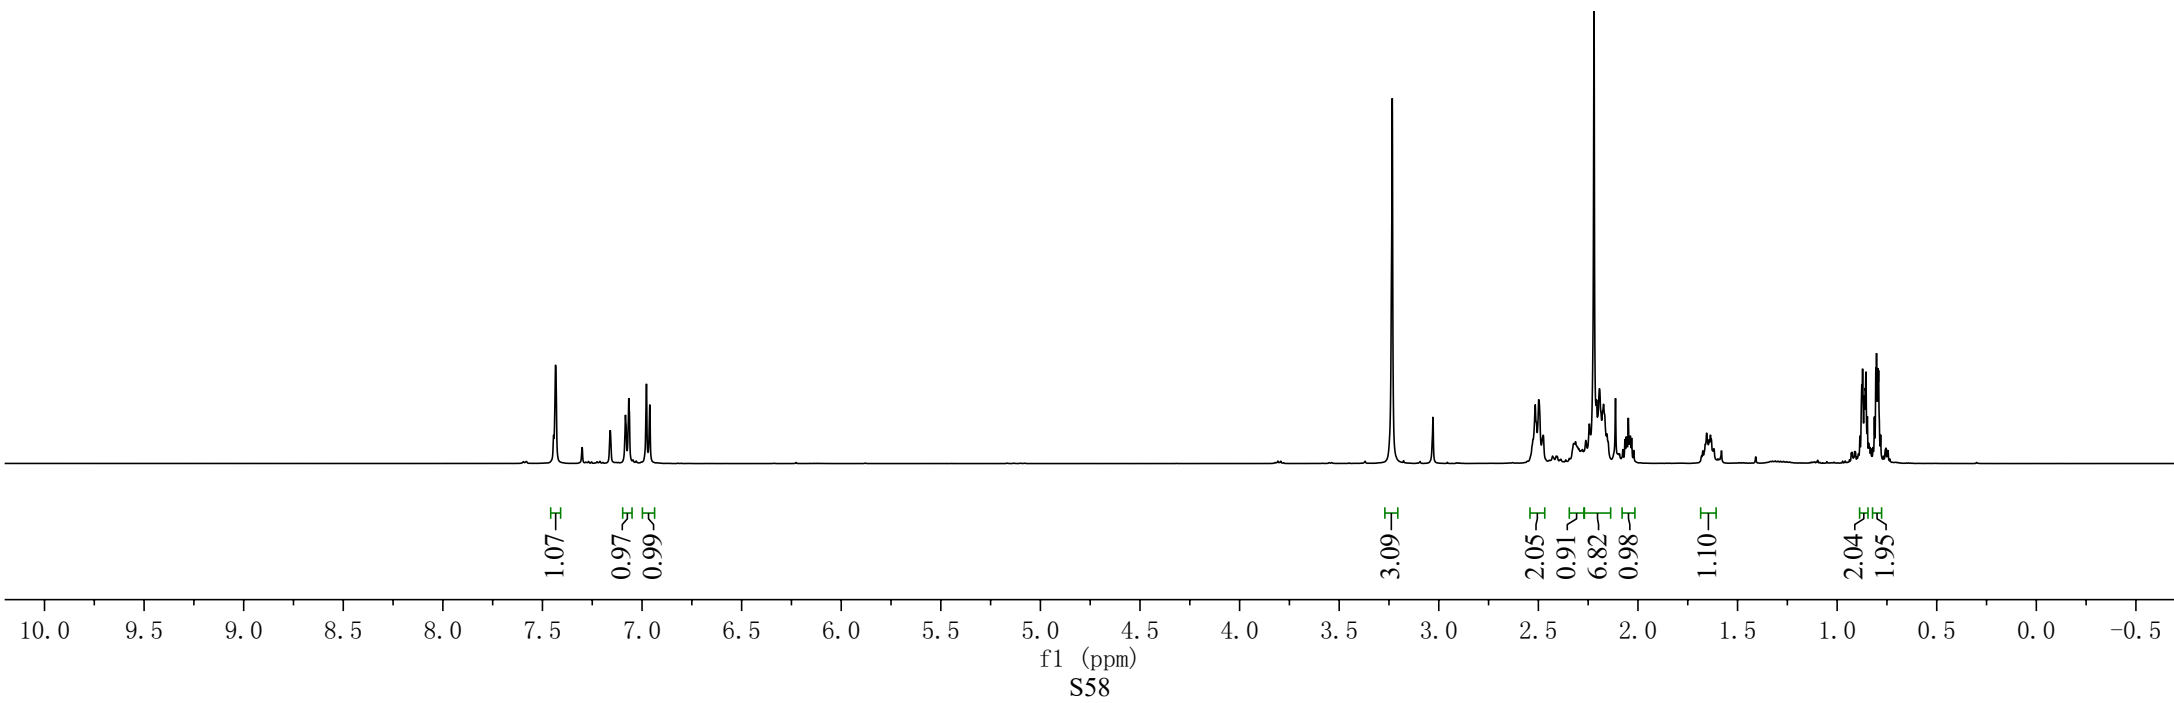

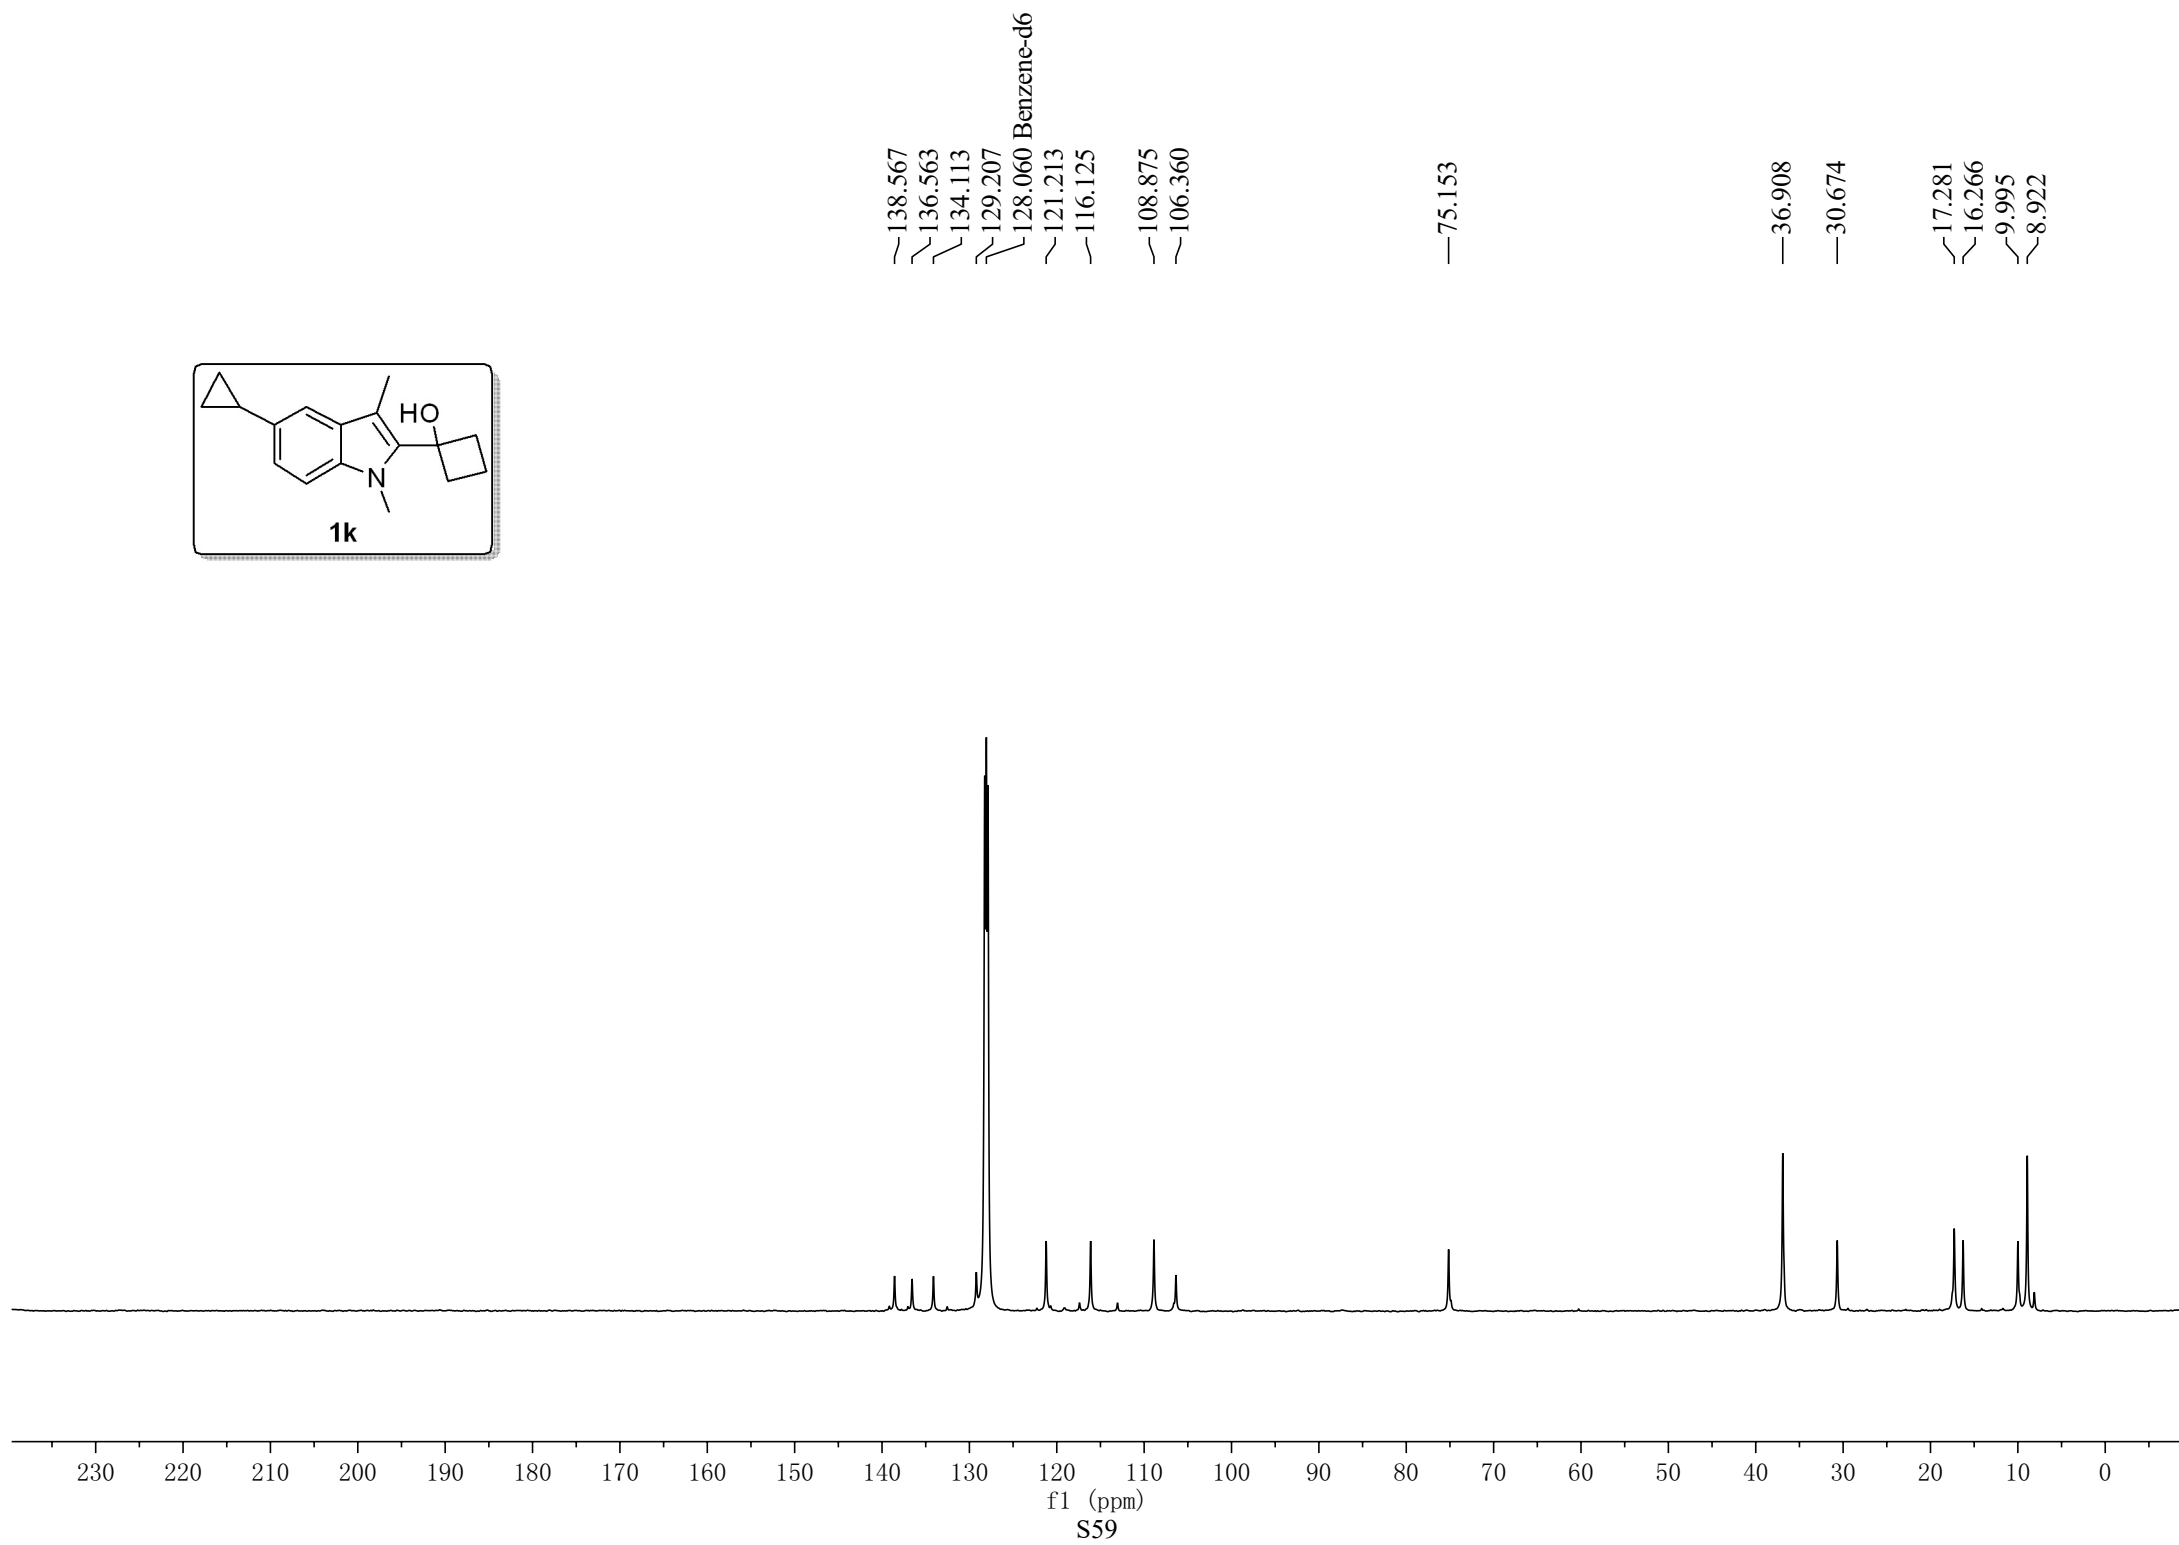

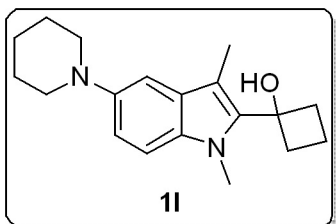

7.296  
7.292  
Benzene-d6  
7.160  
7.150  
7.146  
7.025  
7.008

3.304  
3.119  
3.108  
3.097

2.600  
2.582  
2.294  
2.287  
2.270

1.707  
1.702  
1.696  
1.691  
1.685  
1.673  
1.440  
1.429  
0.502

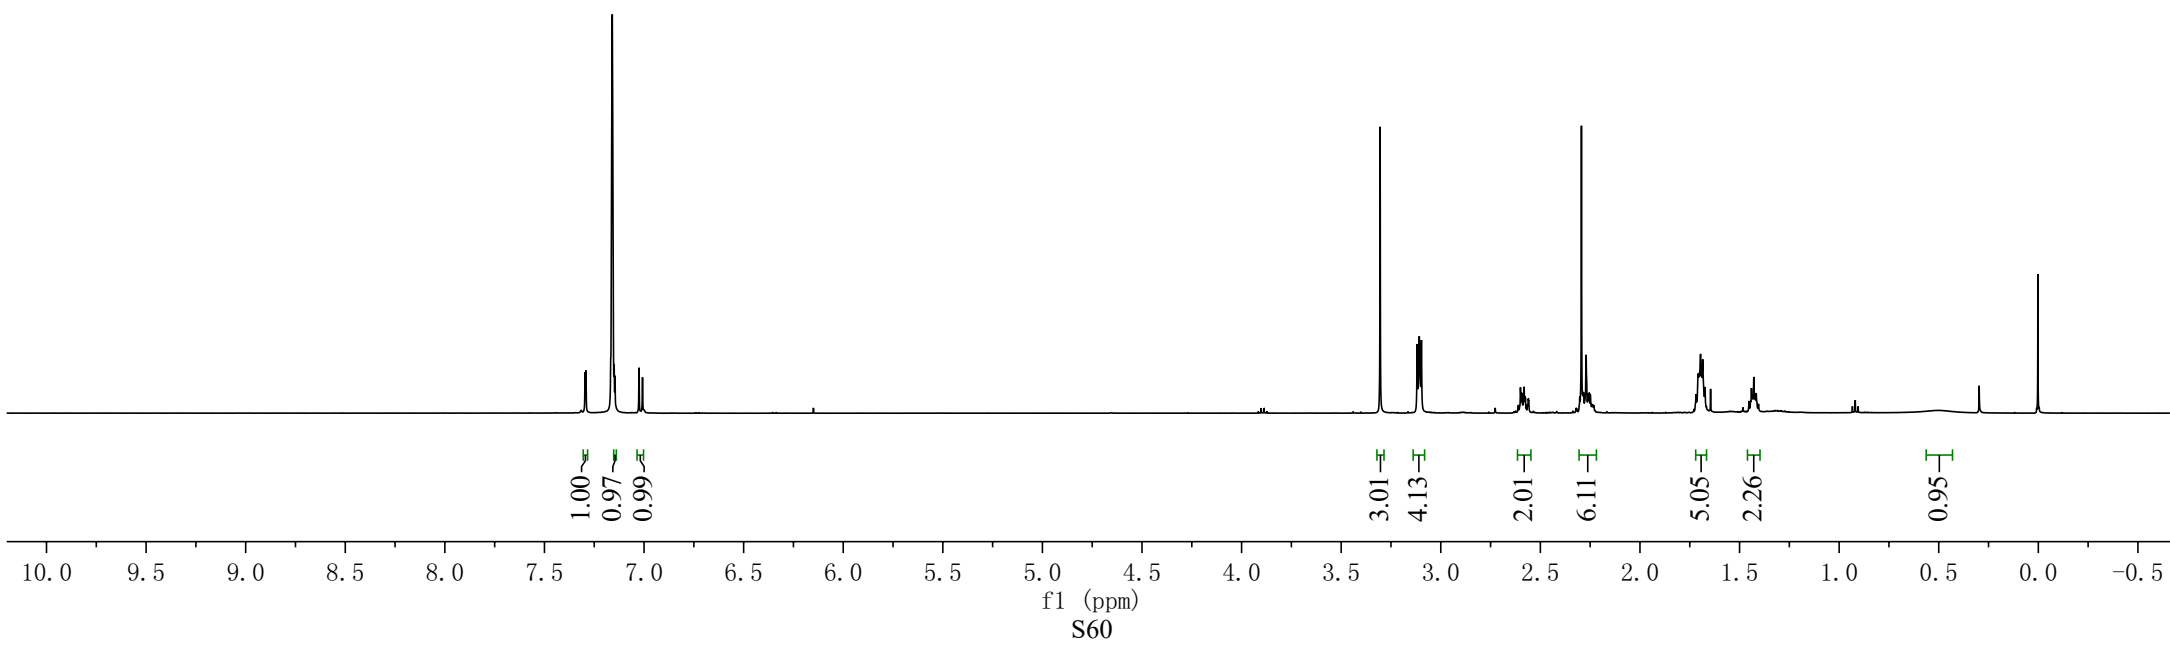



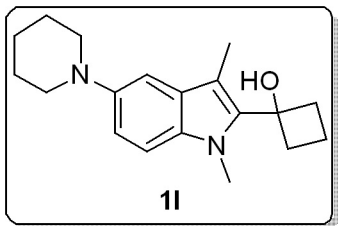

11

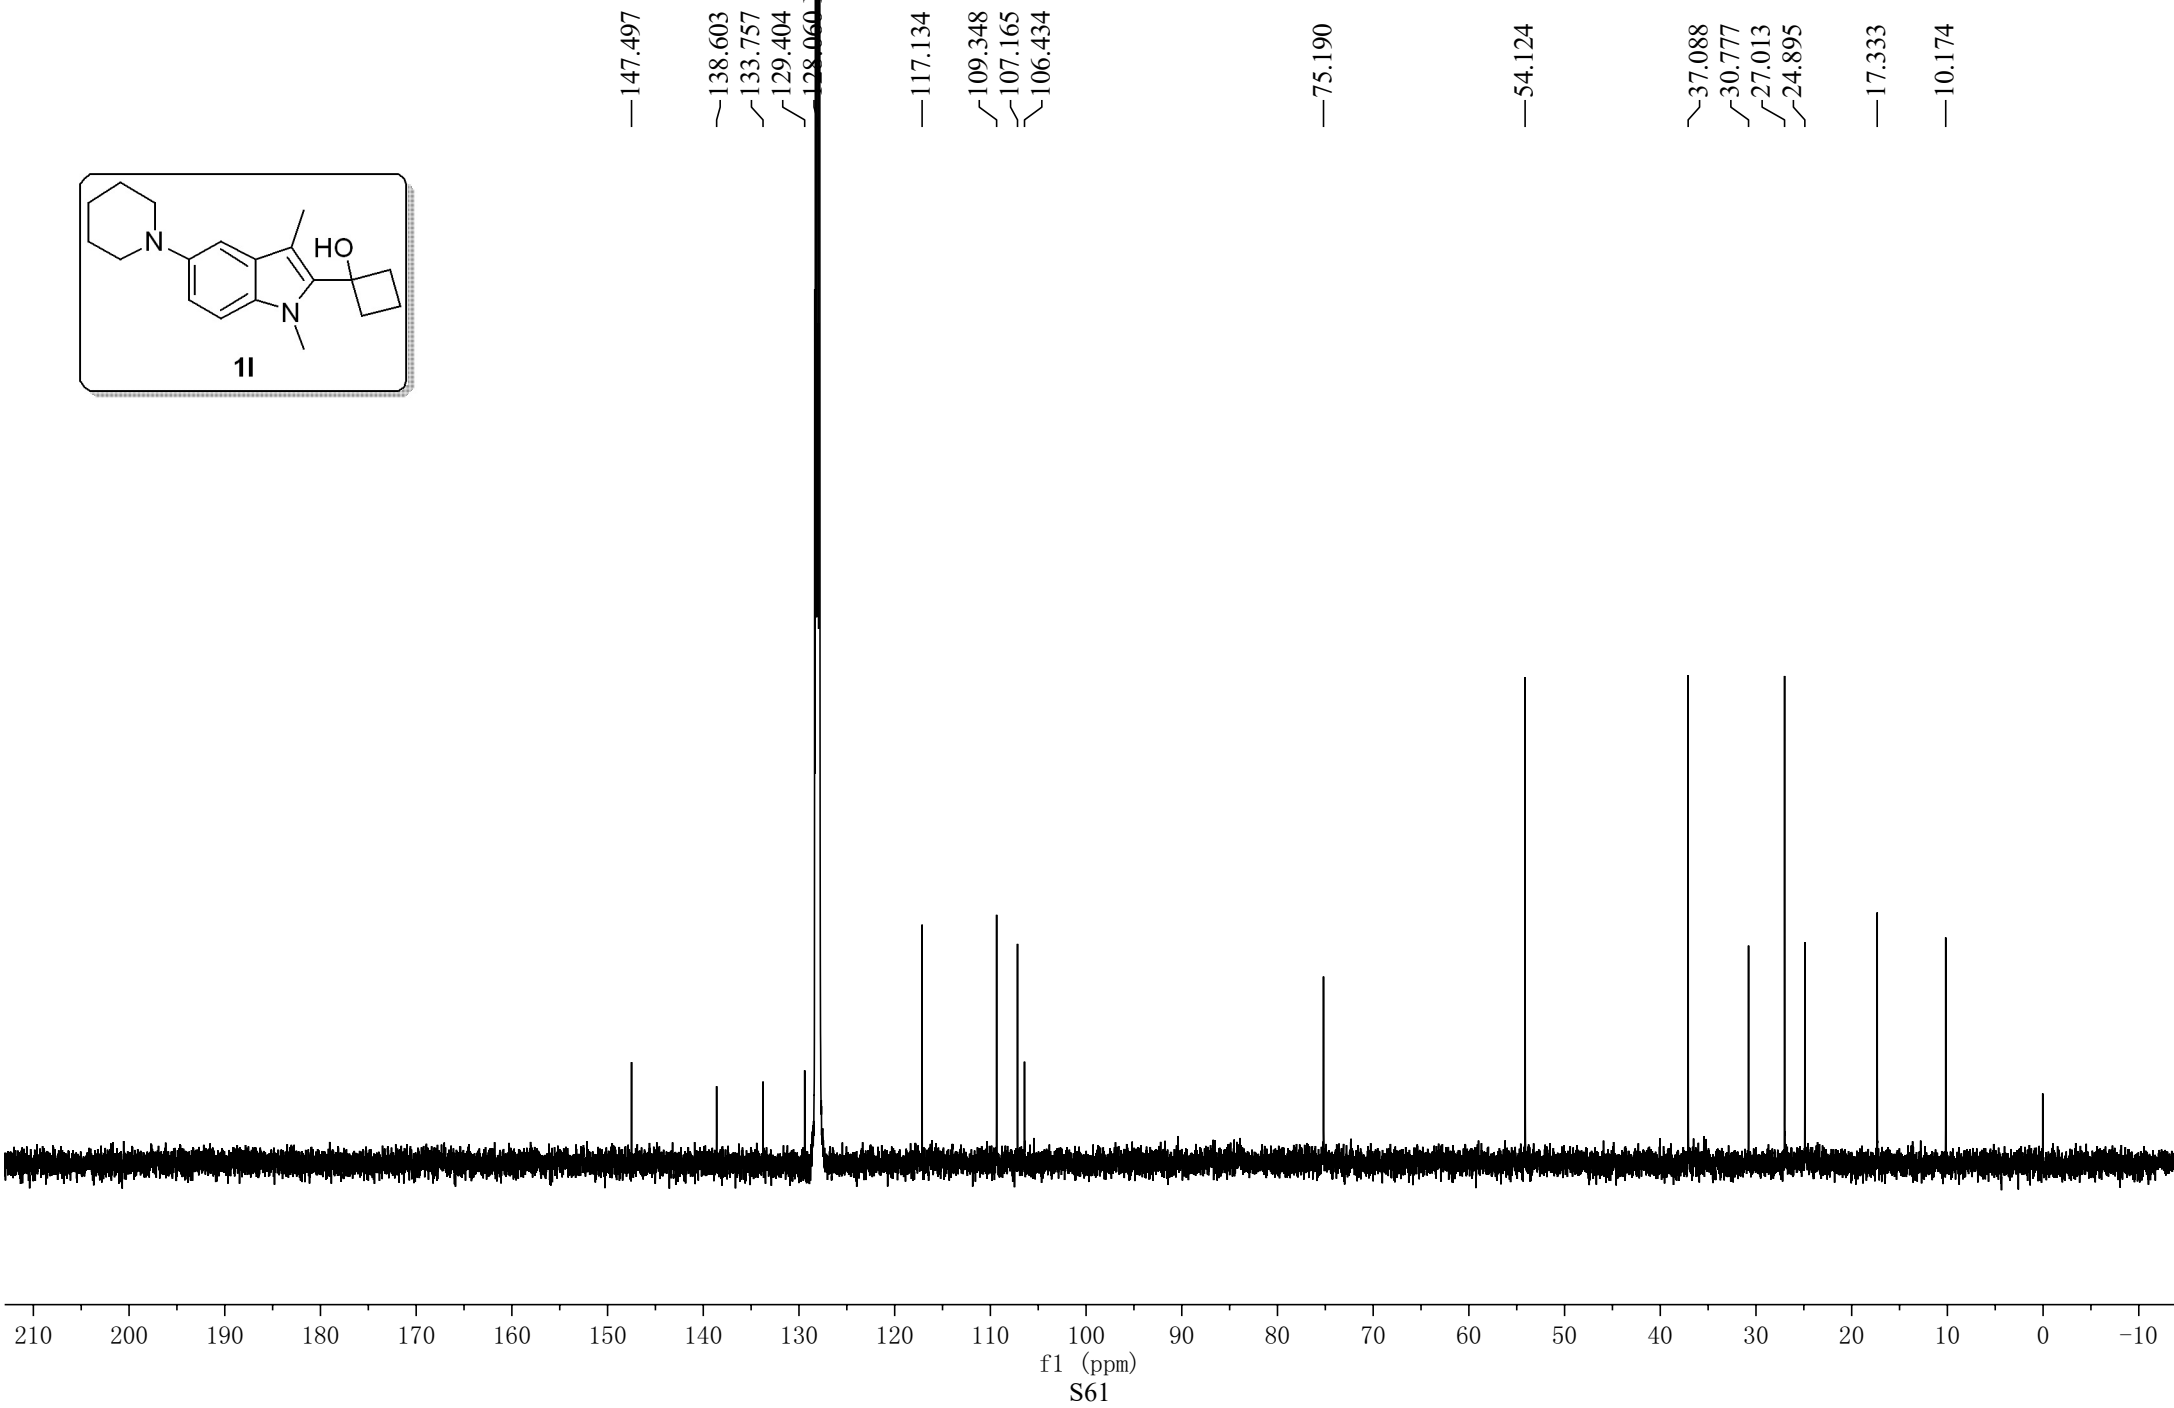

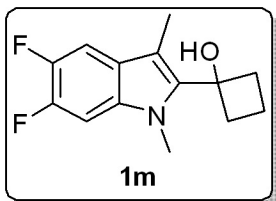

7.160 Benzene-d6  
 7.160  
 7.147  
 7.145  
 7.142  
 7.139  
 7.126  
 7.124  
 6.665  
 6.651  
 6.643  
 6.630

3.027  
 2.443  
 2.426  
 2.422  
 2.419  
 2.408  
 2.402  
 2.384  
 2.204  
 2.183  
 2.166  
 2.124  
 2.119  
 2.113  
 2.106  
 2.100  
 2.094  
 2.091  
 2.083  
 2.077  
 1.988  
 1.632  
 1.629  
 1.611

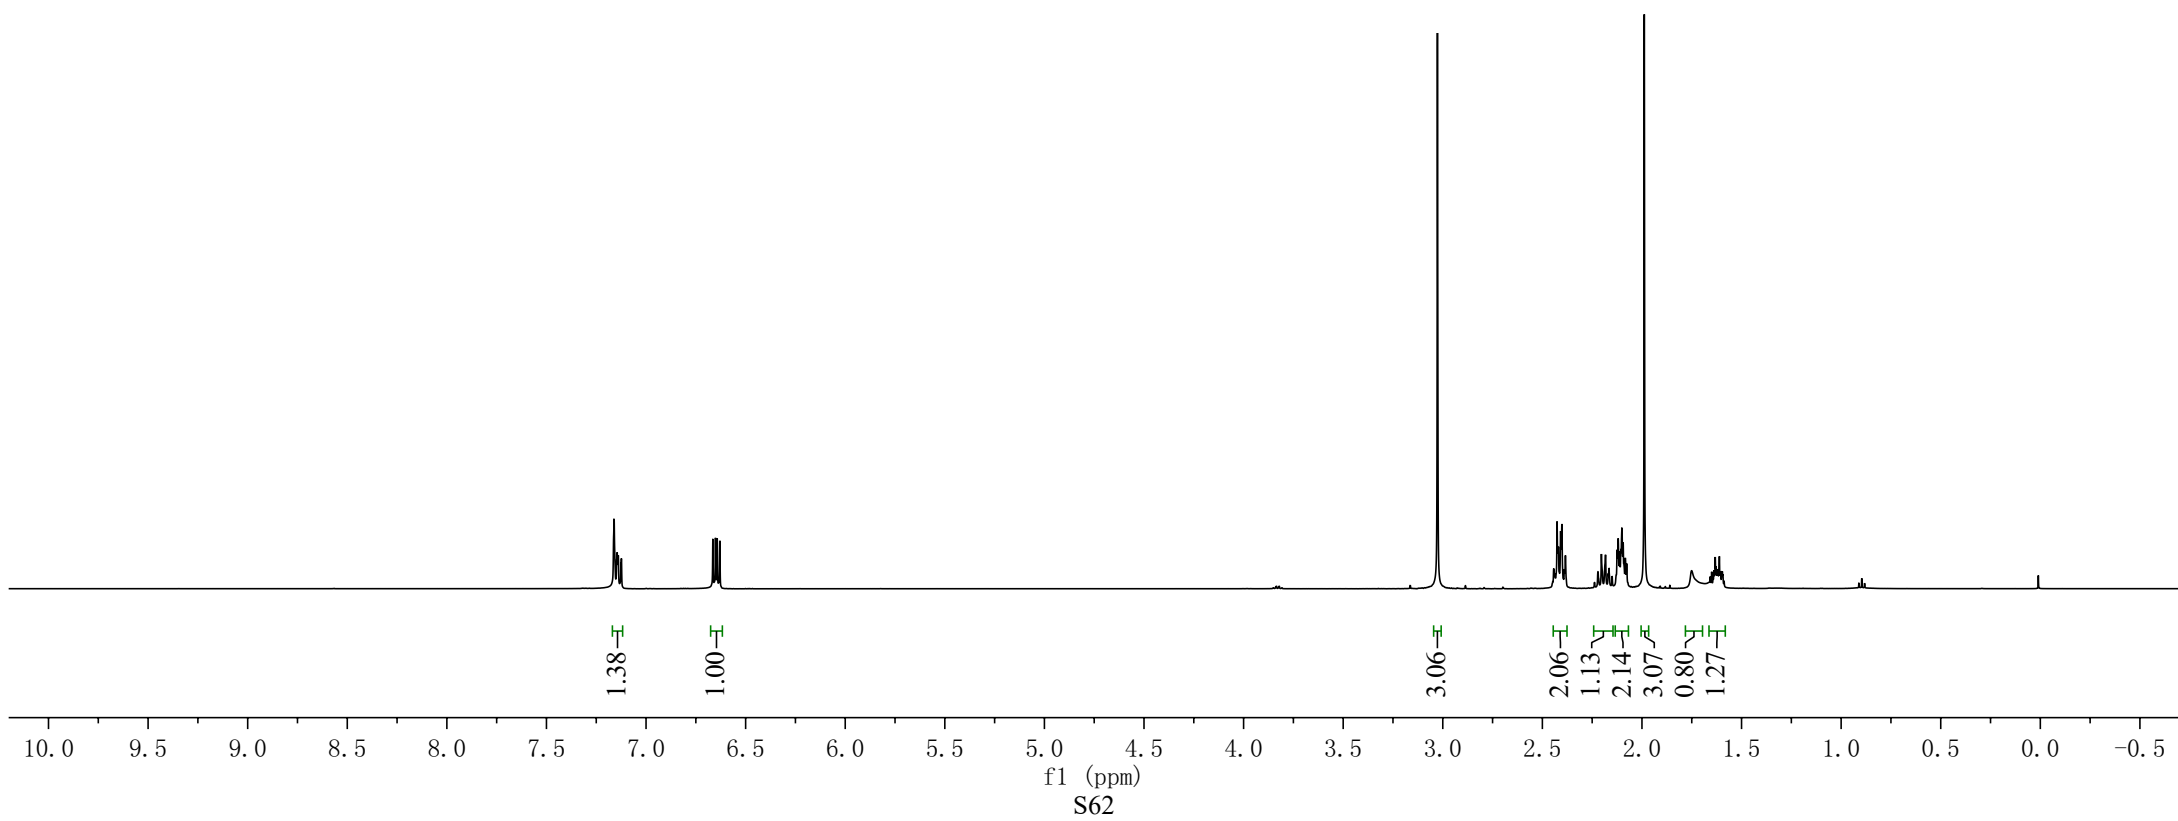

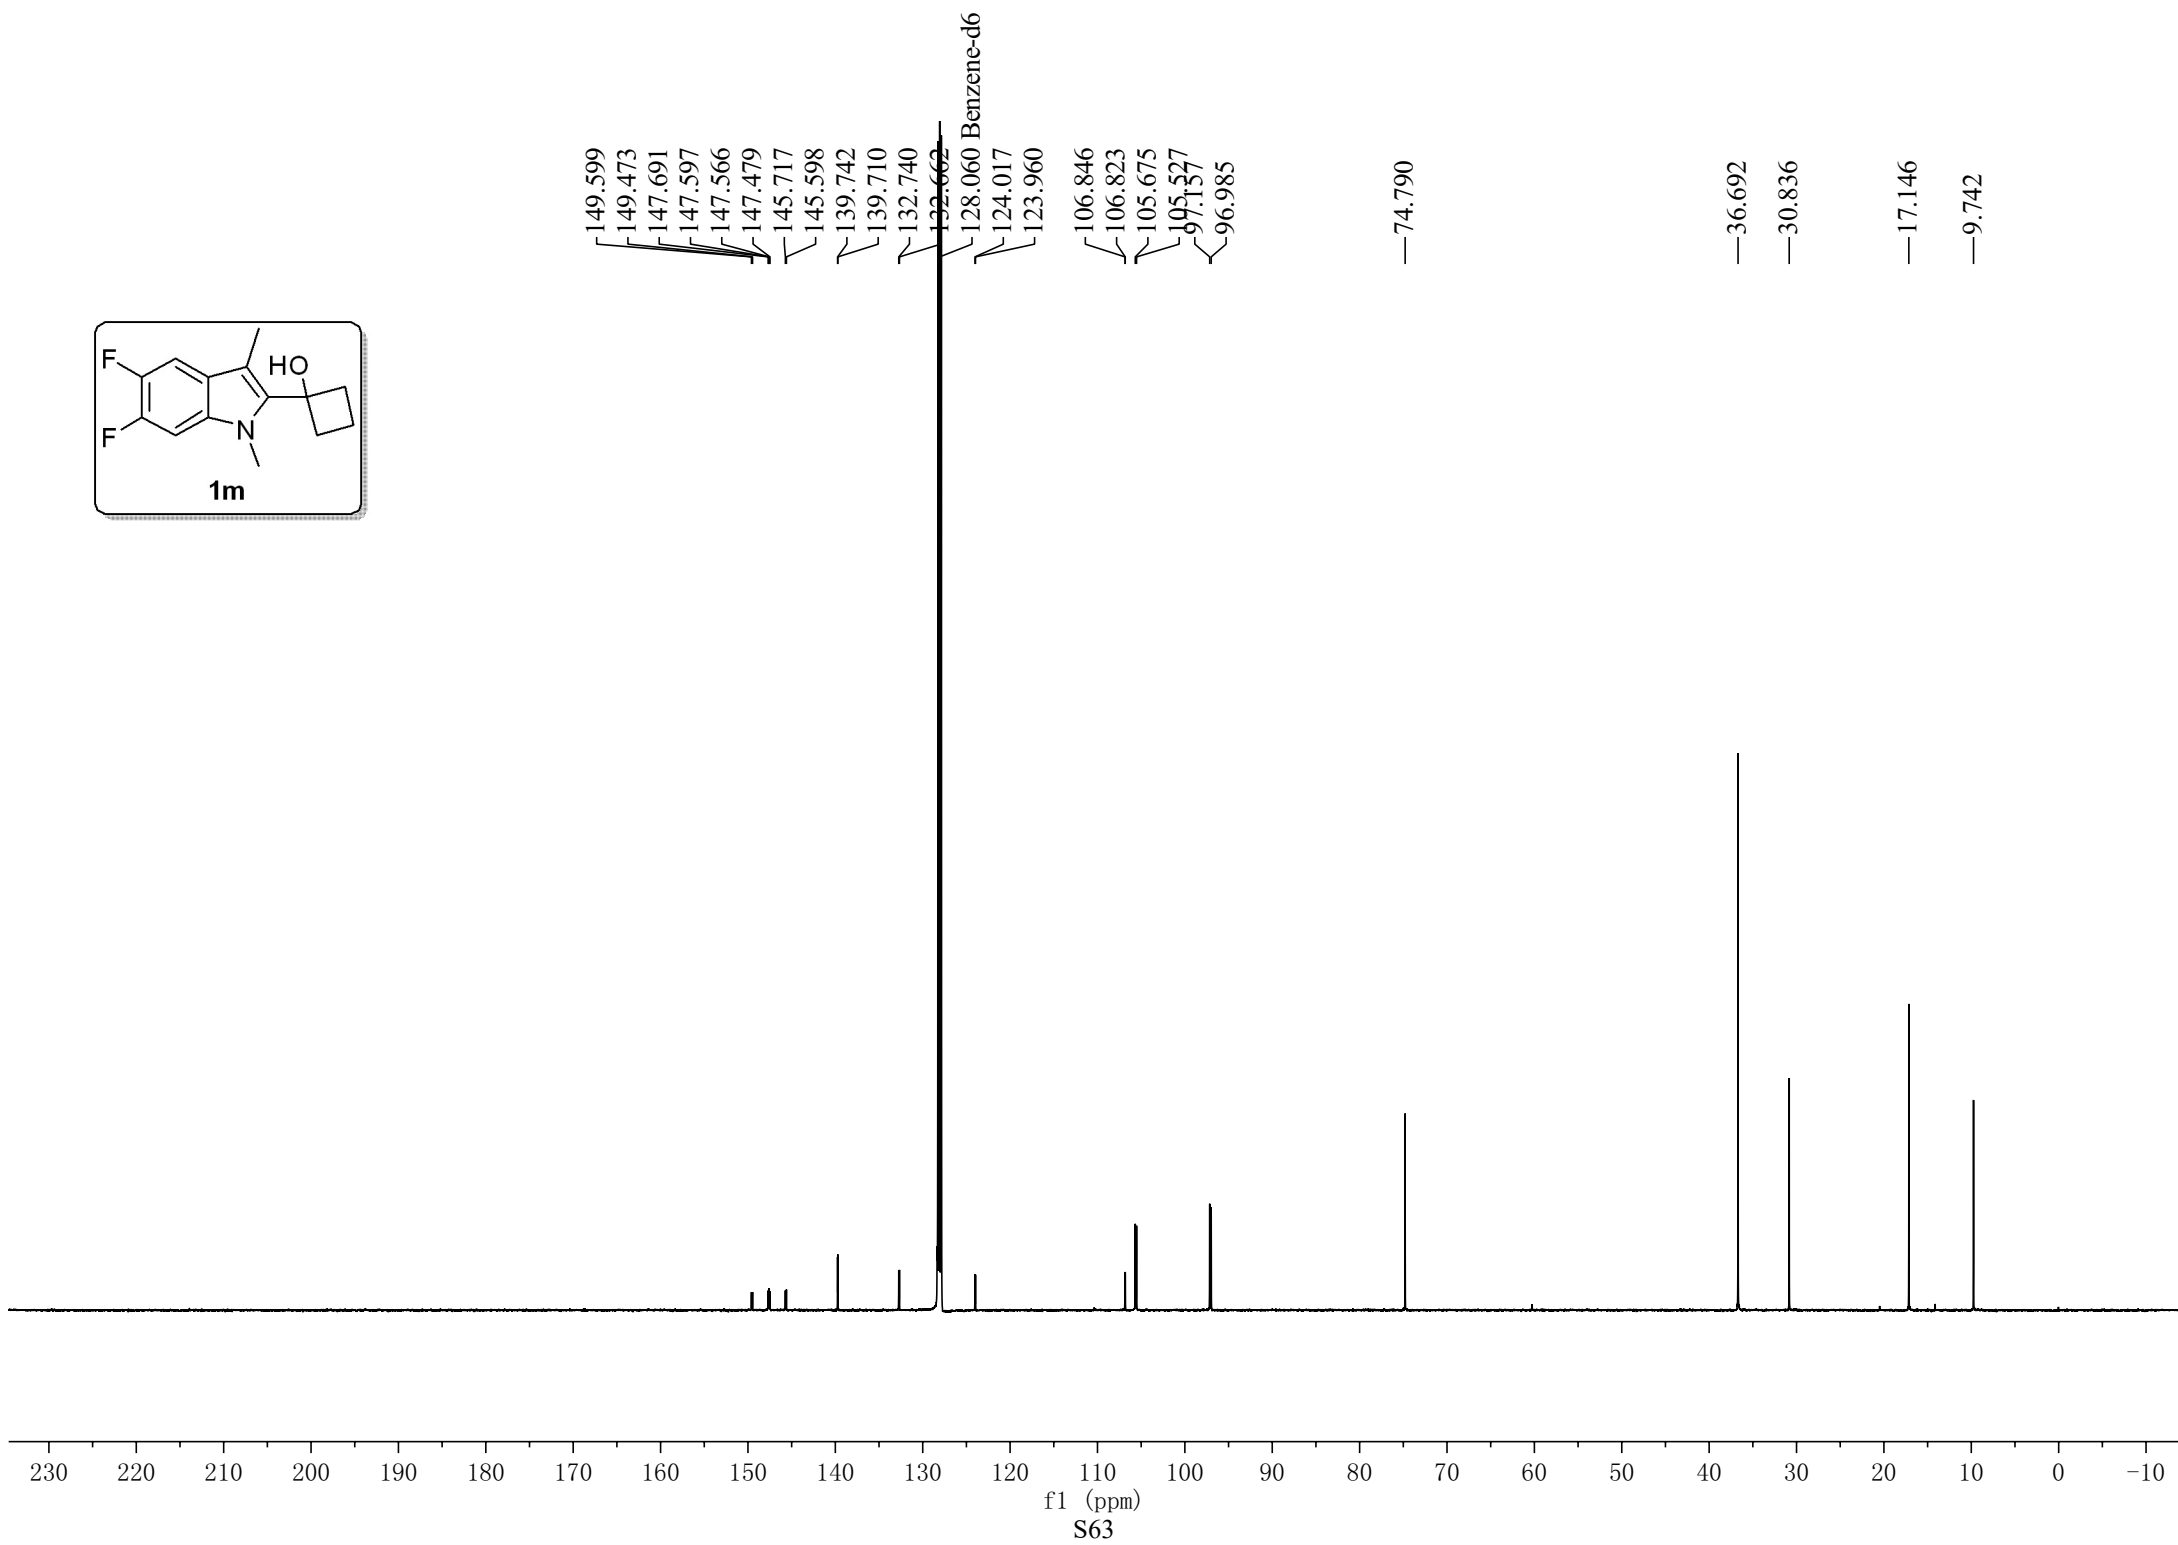

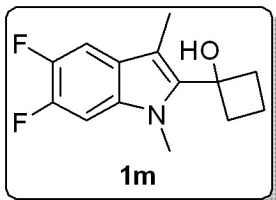

-143.800  
-143.845  
-148.748  
-148.792

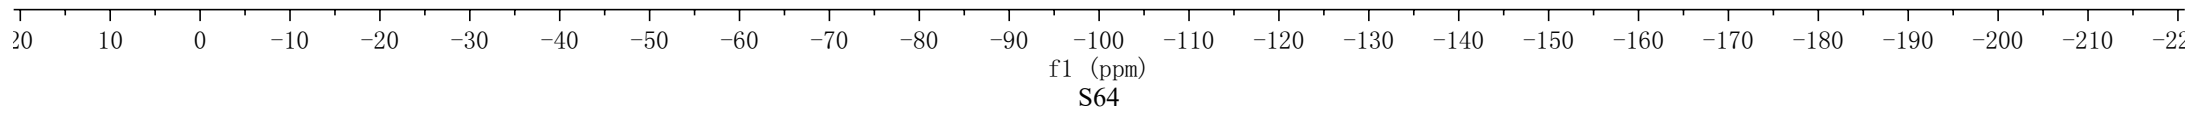

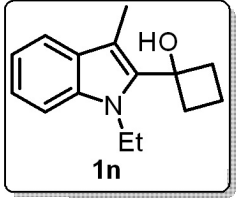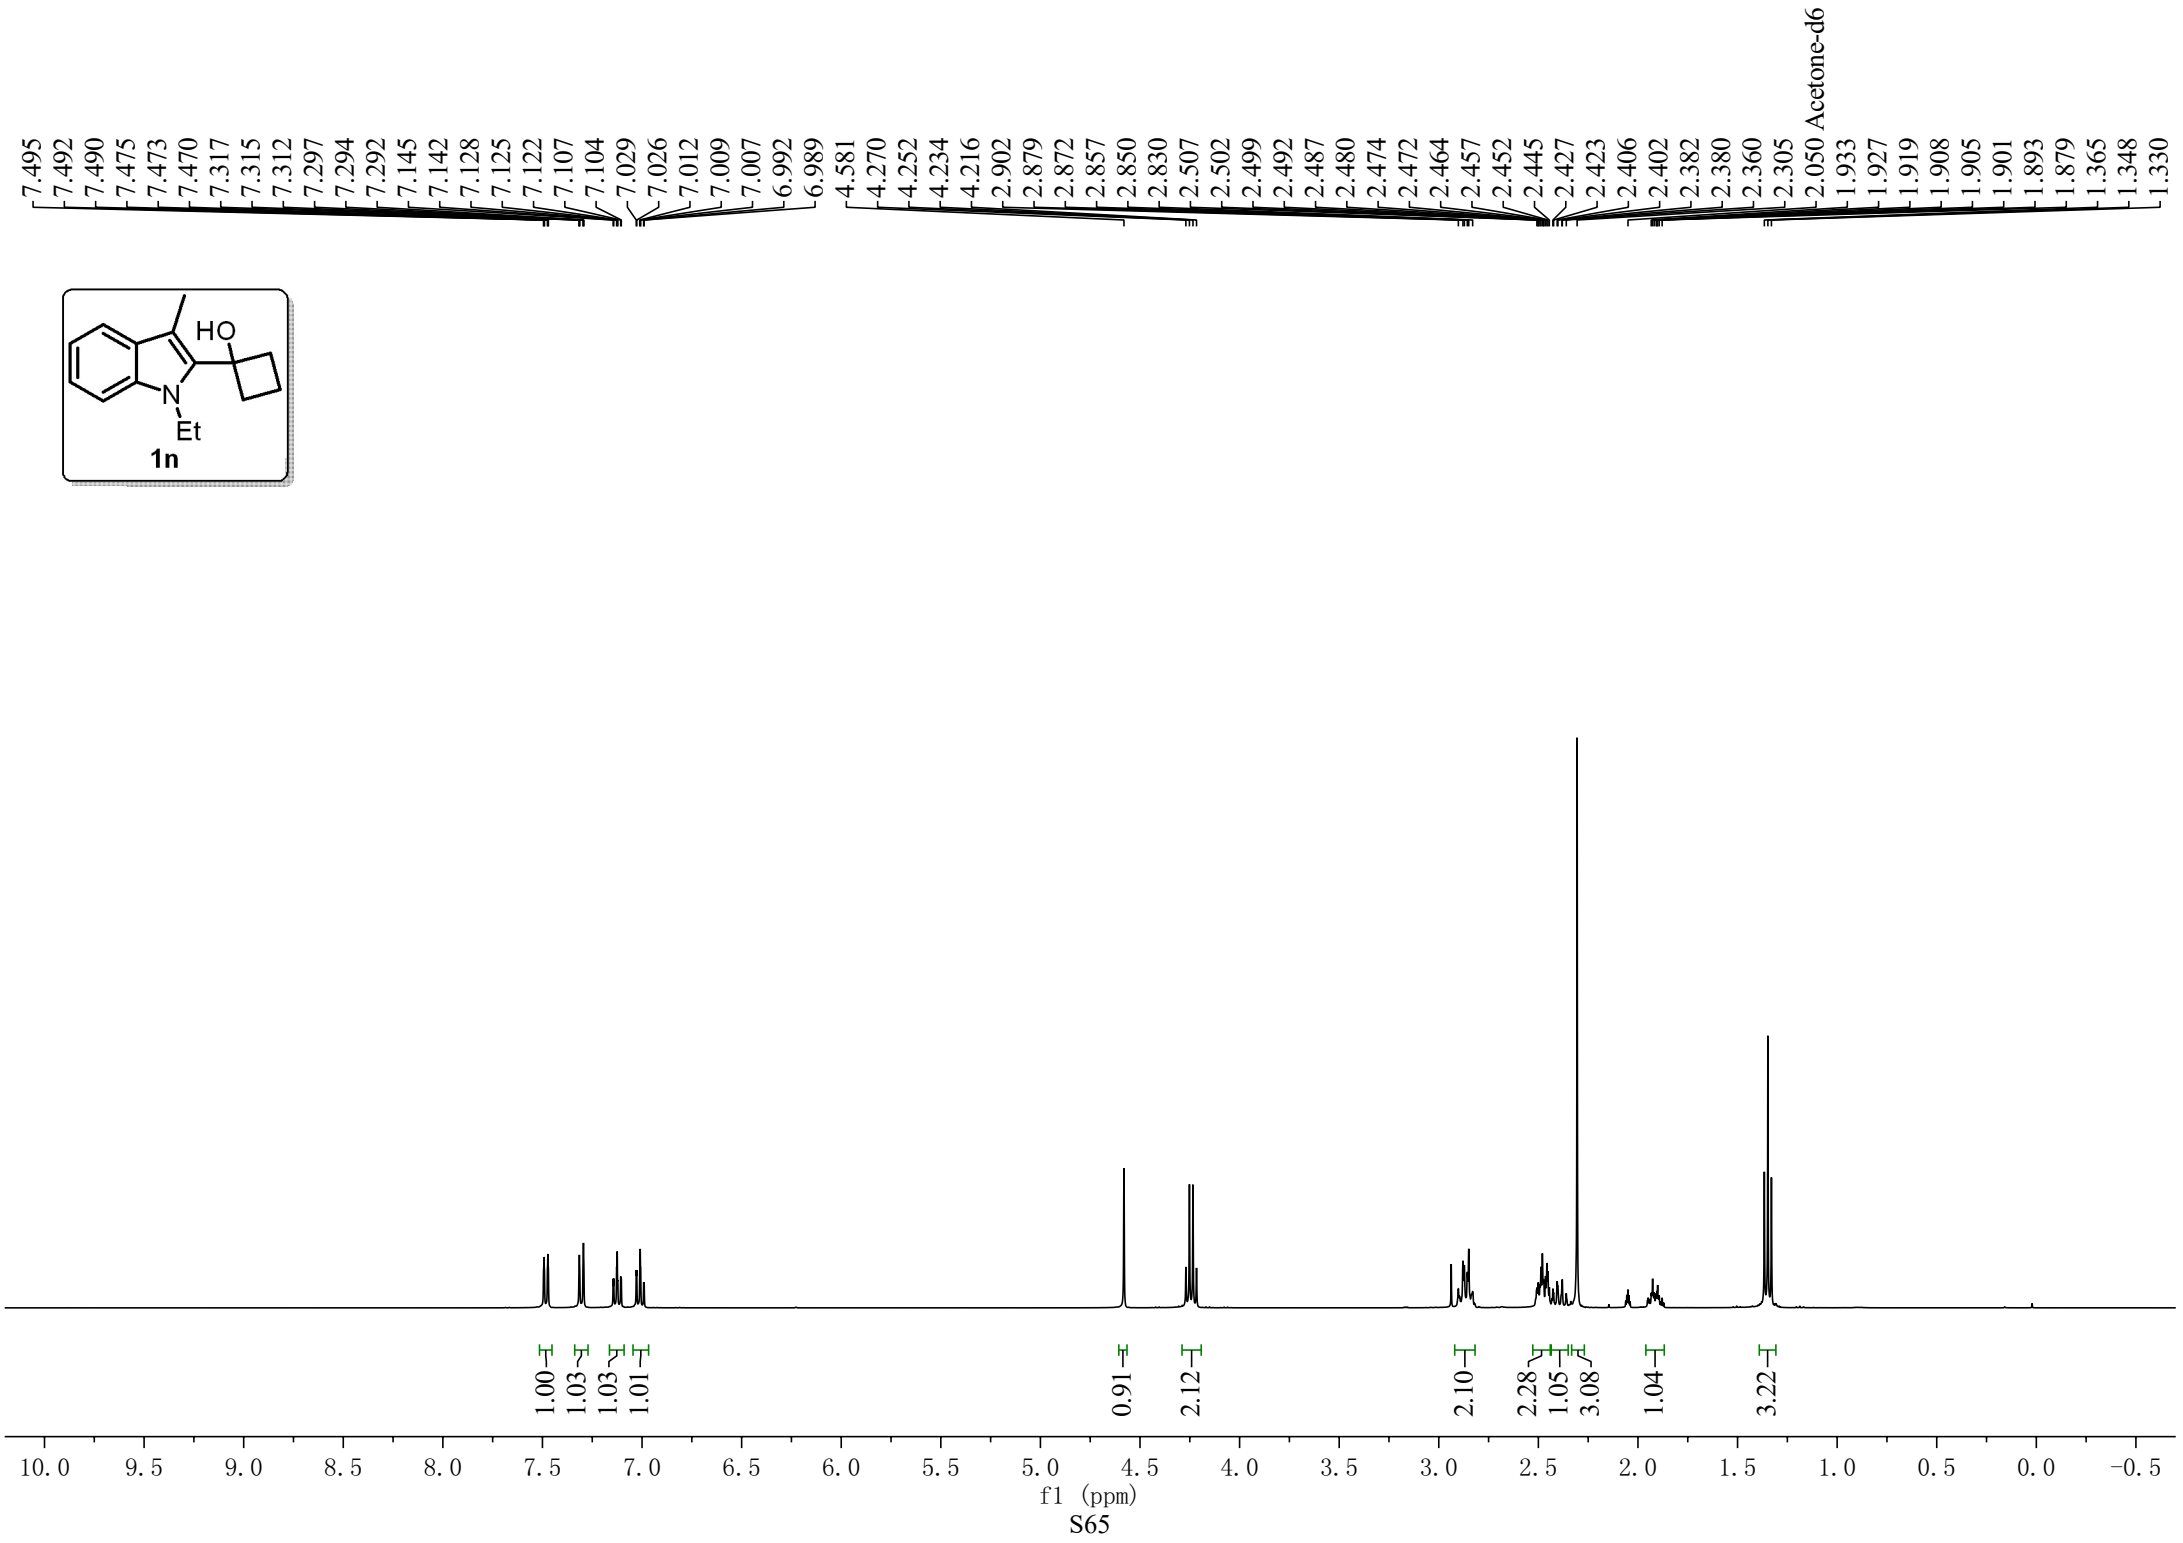

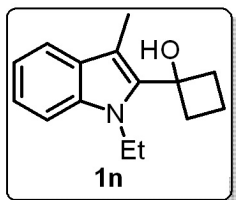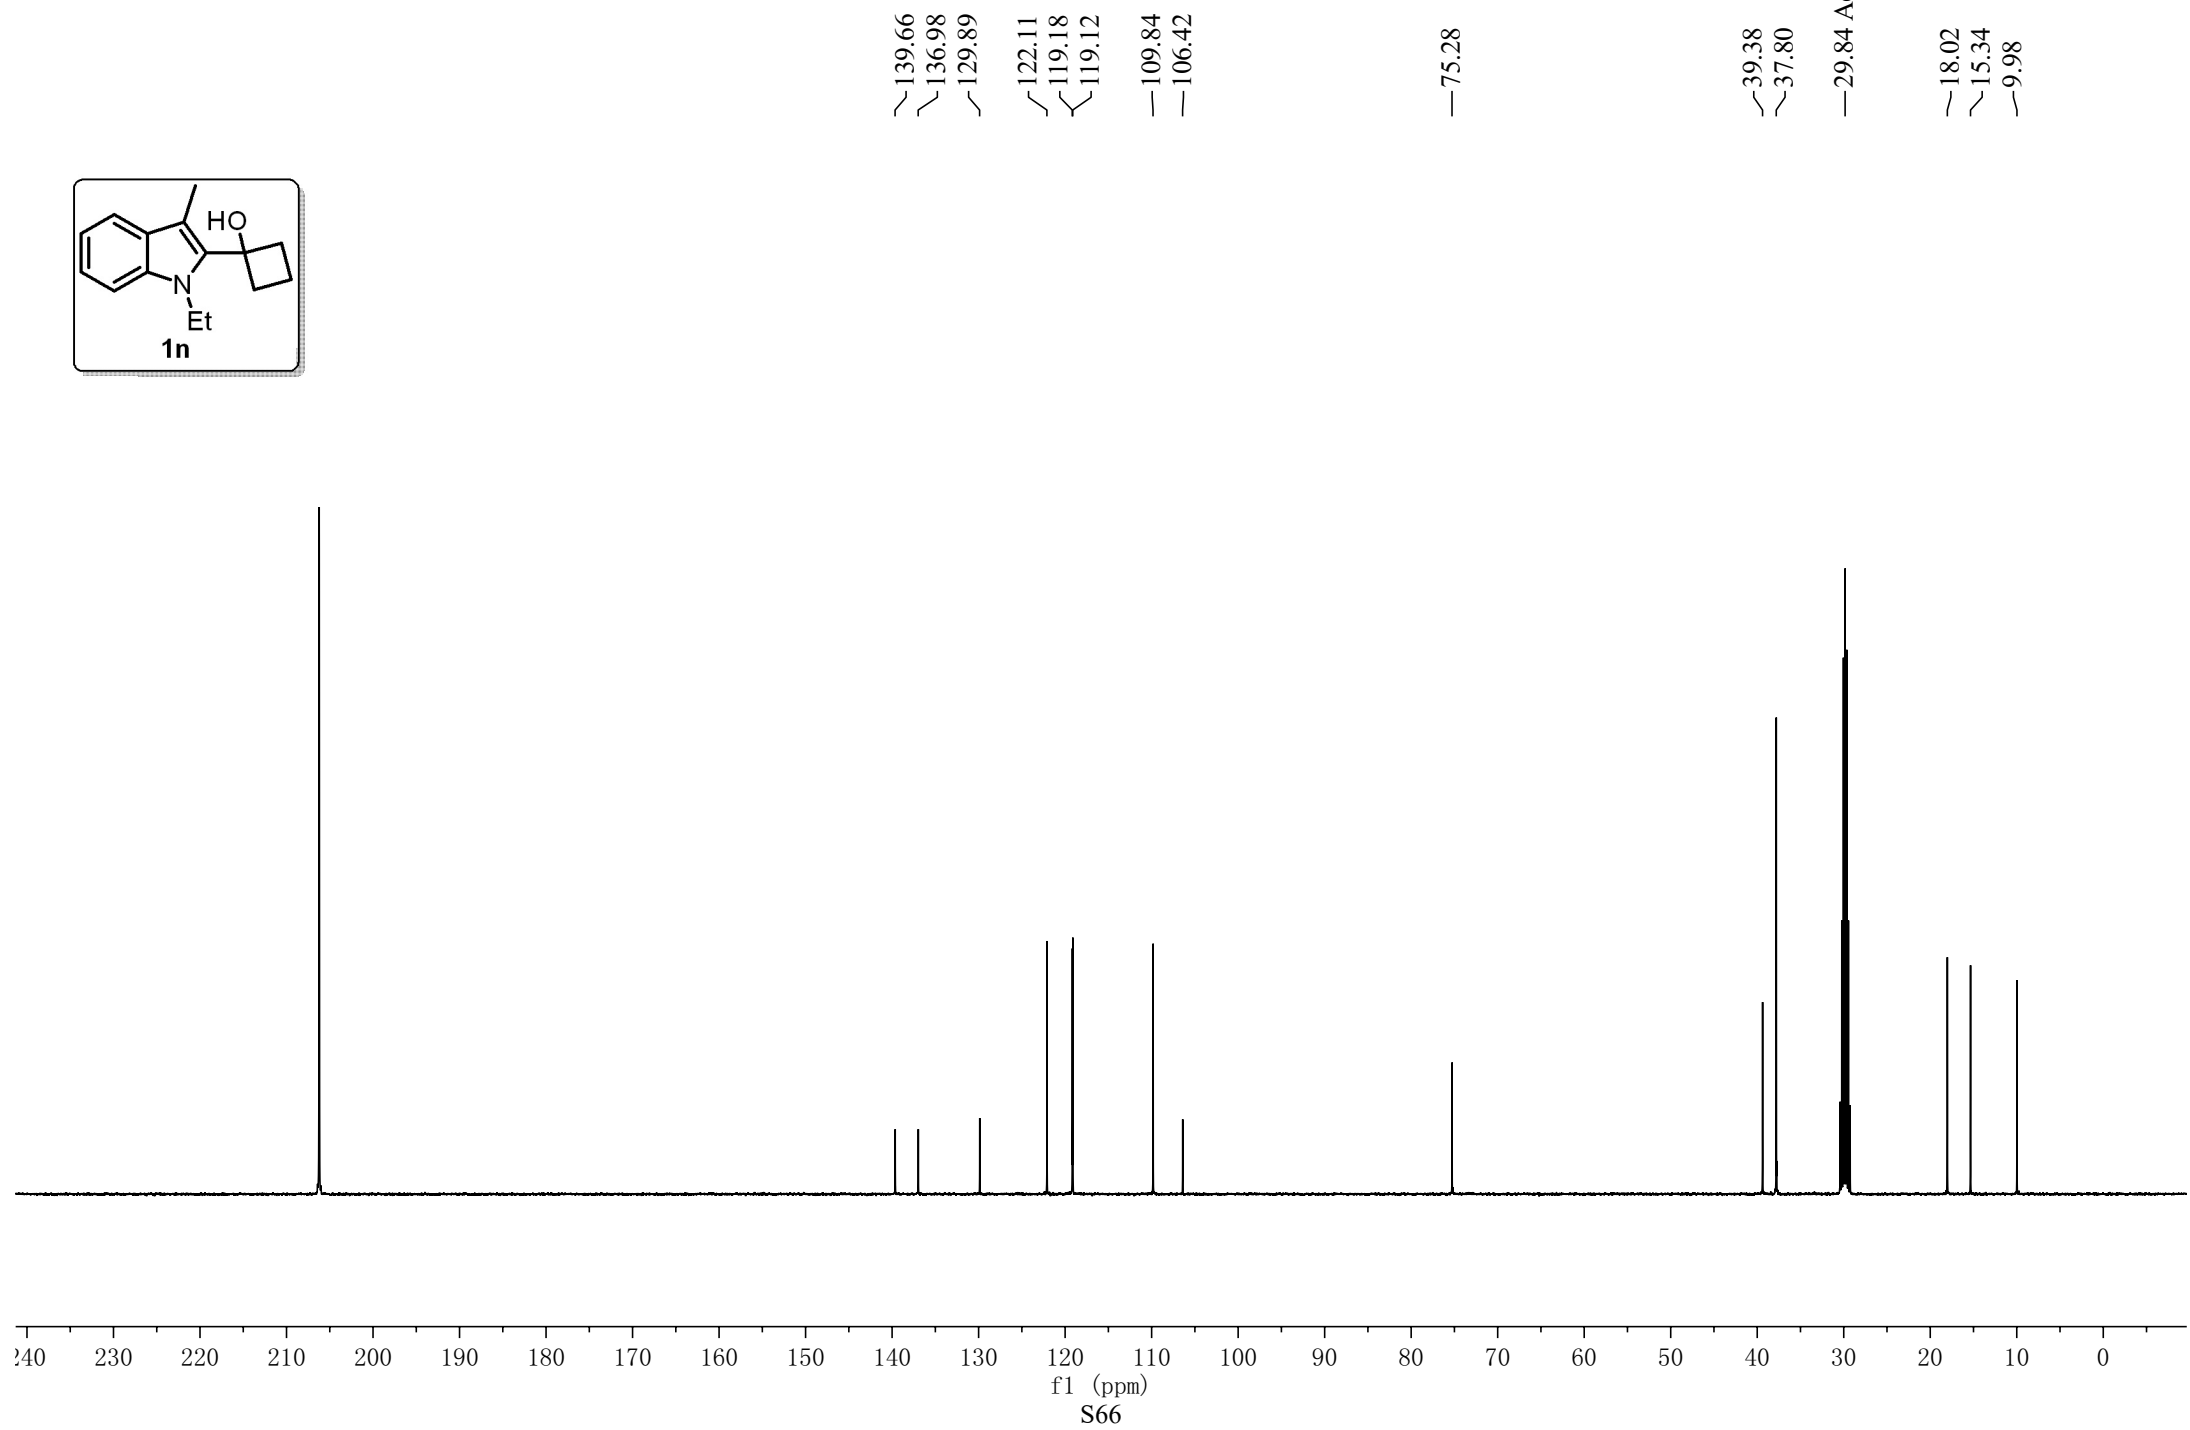

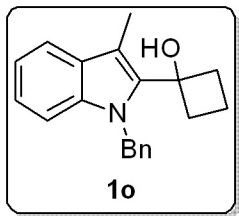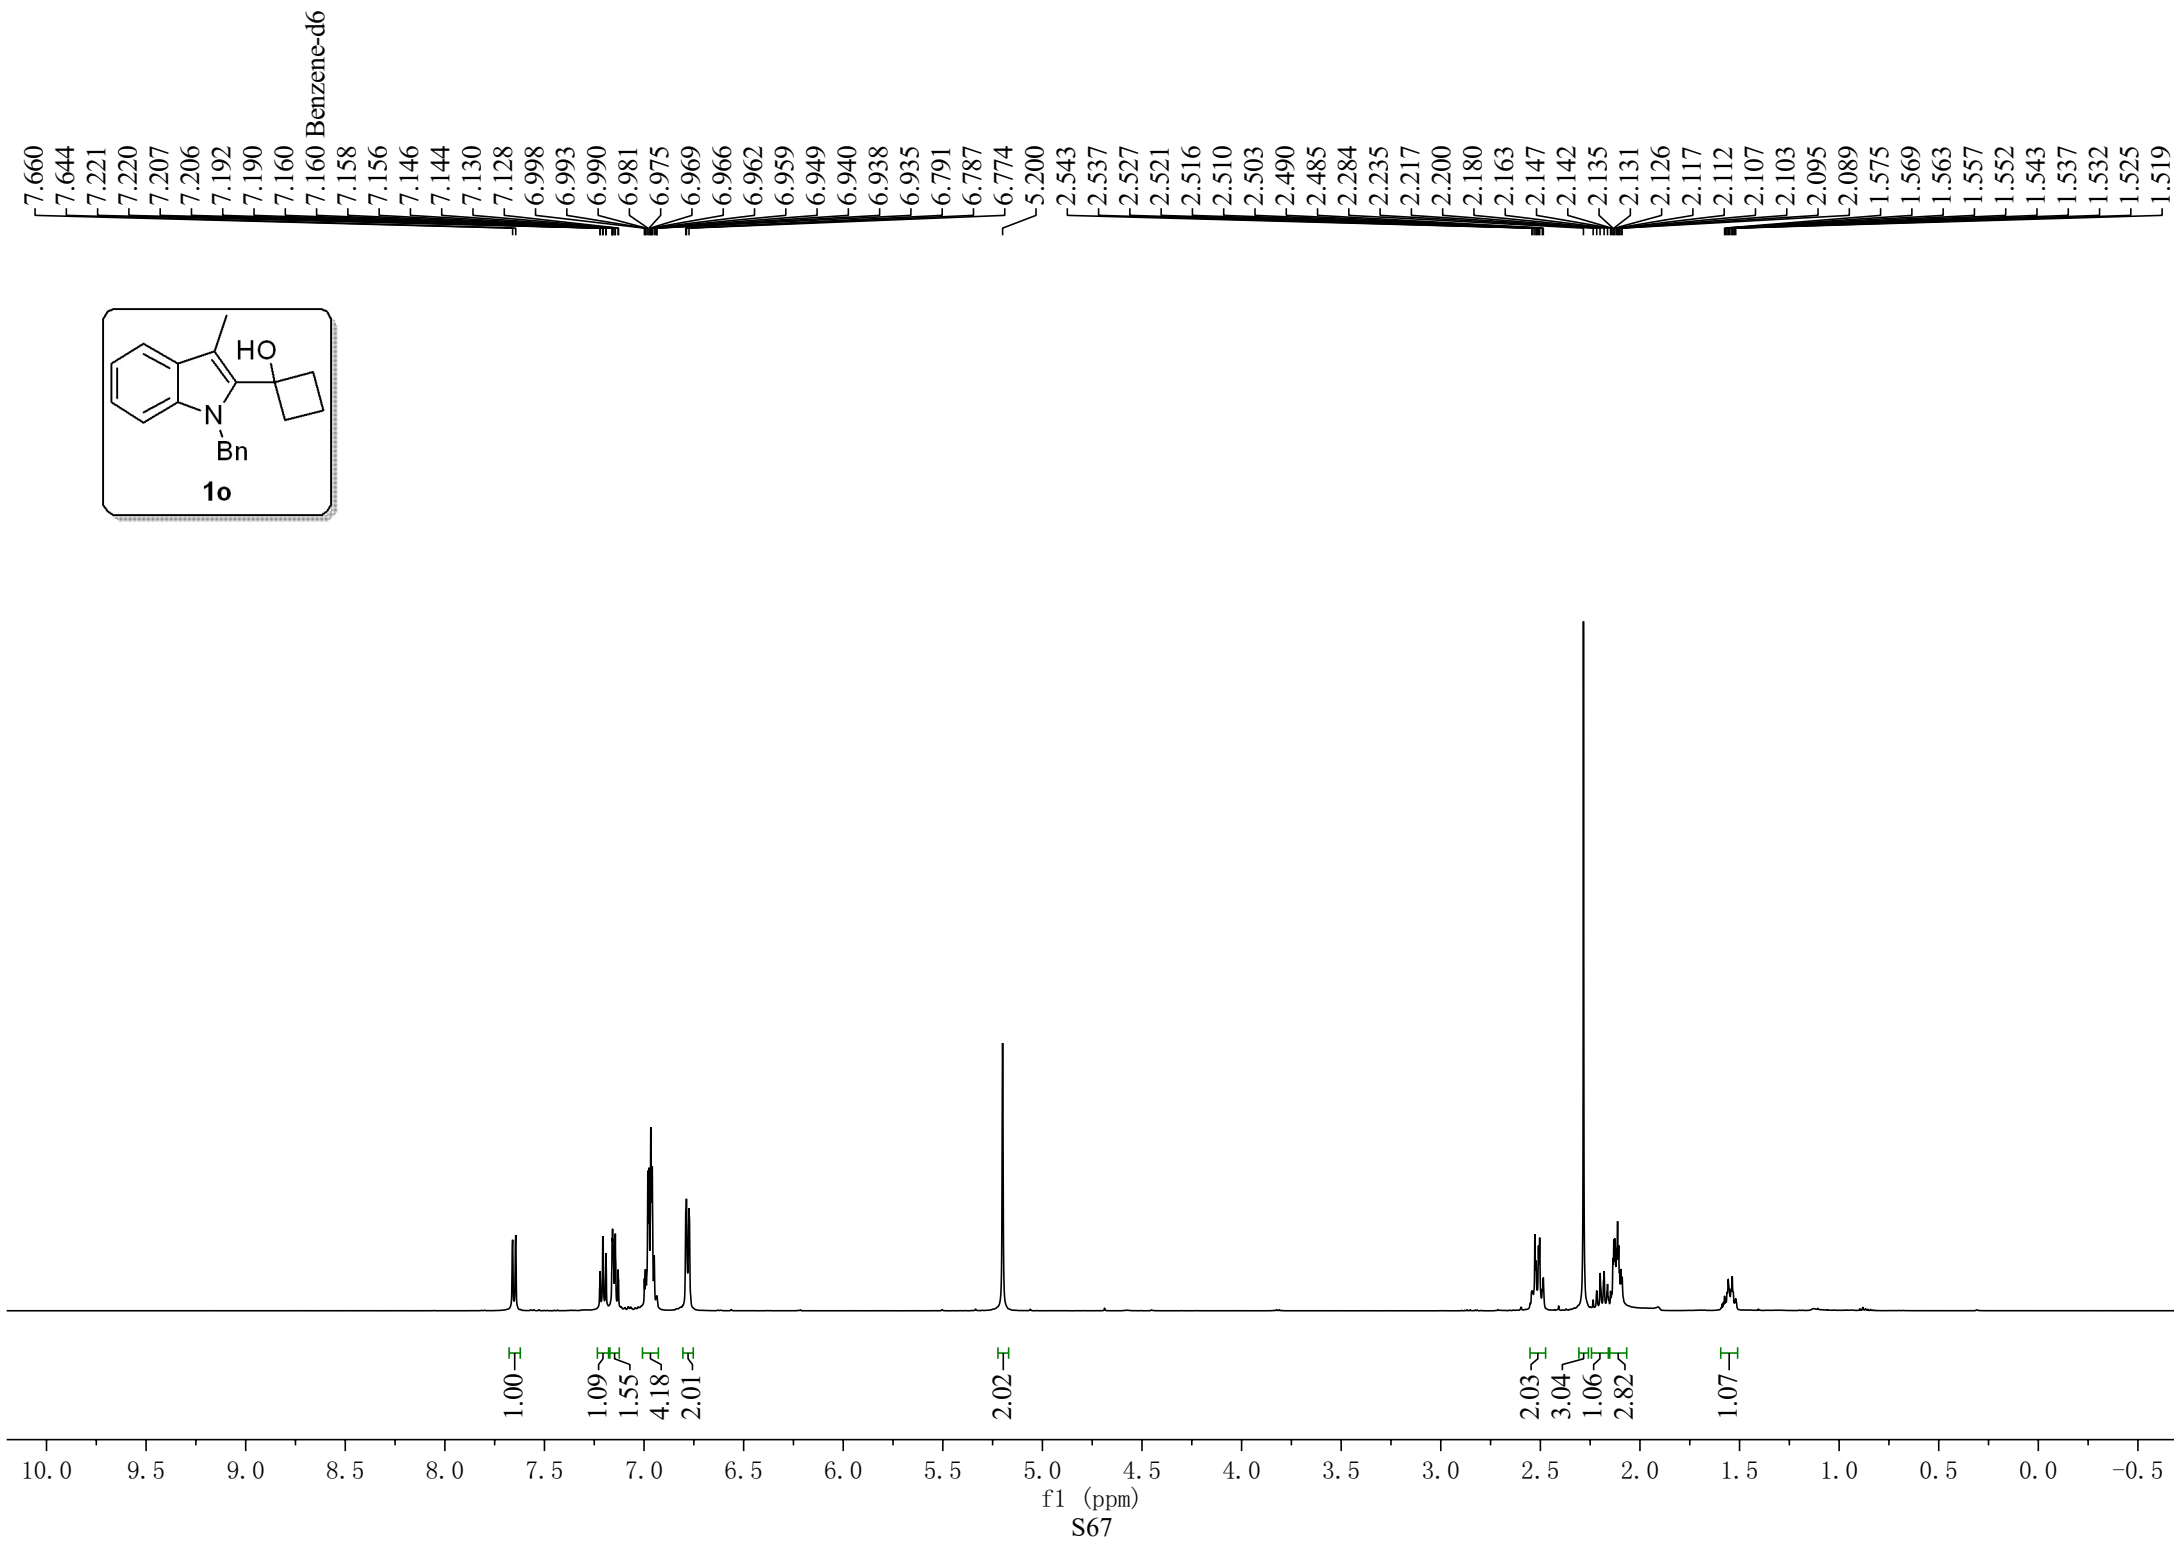

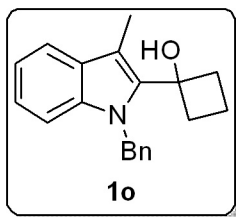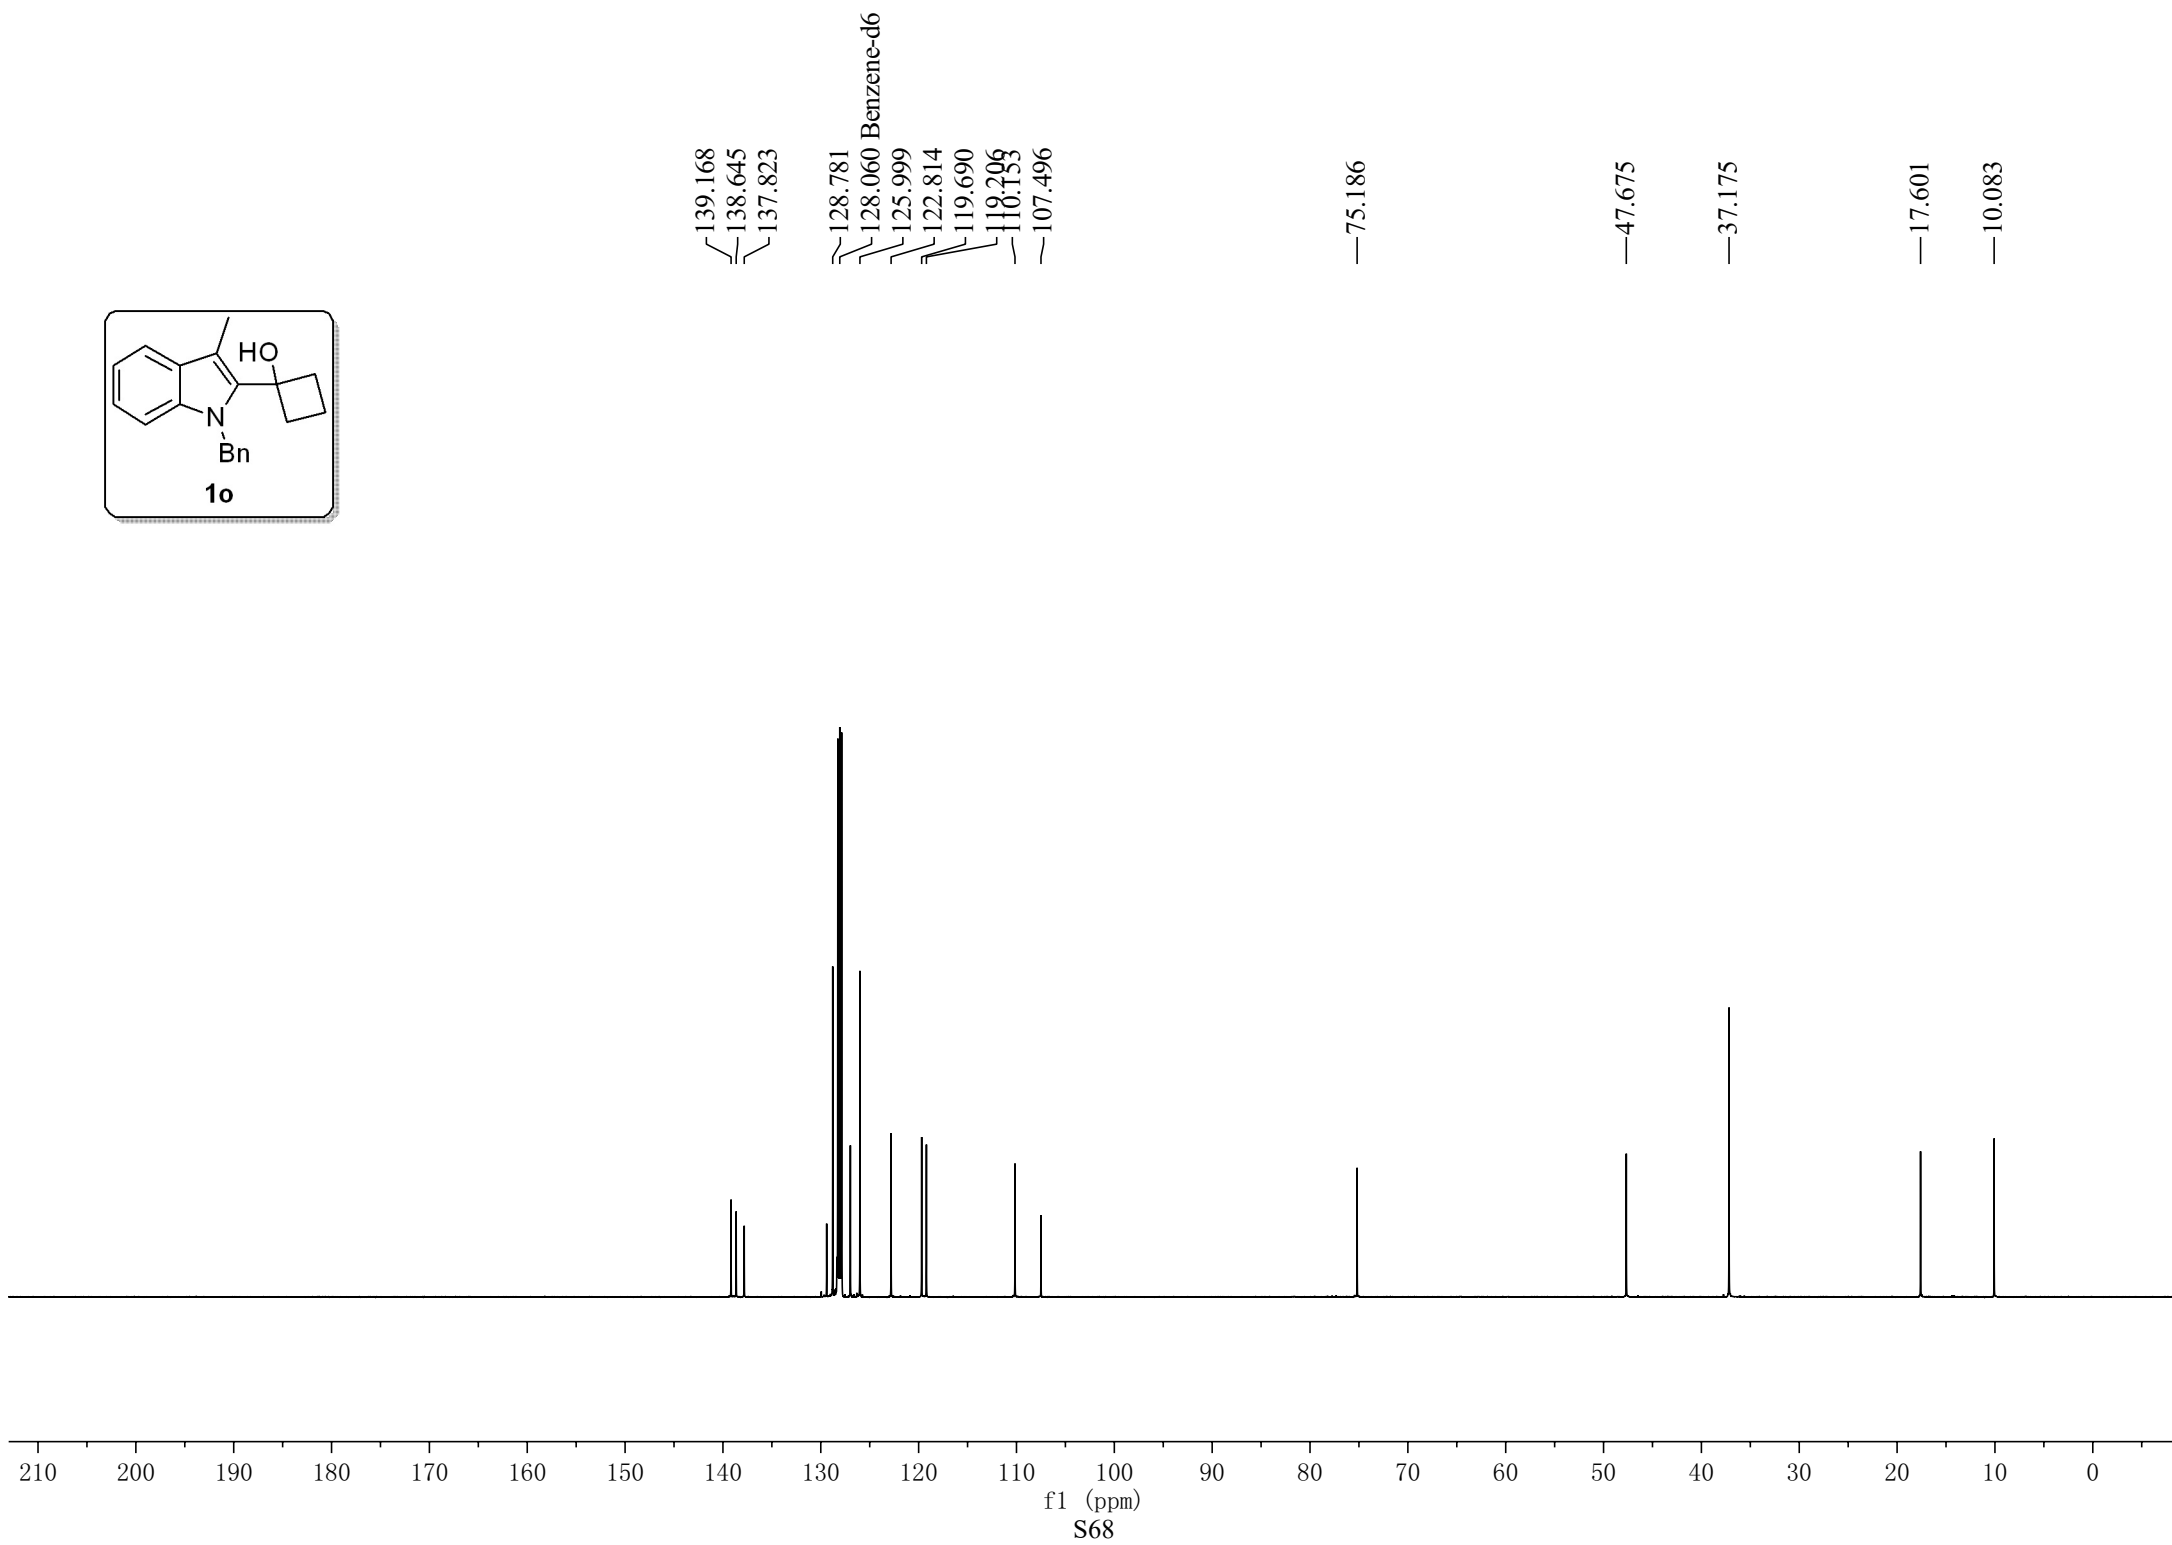



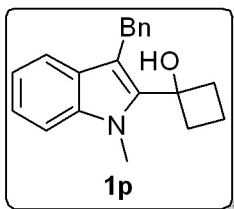

7.567  
7.551  
7.316  
7.314  
7.300  
7.286  
7.284  
7.199  
7.197  
7.183  
7.175  
7.169  
7.168  
7.160  
7.160 Benzene-d6  
7.128  
7.114  
7.100  
7.084  
7.035  
7.021  
7.006

4.150

3.346

2.572  
2.565  
2.554  
2.548  
2.212  
2.203  
2.193  
2.182  
1.799  
1.599  
1.595  
1.588  
1.580  
1.570  
1.563  
1.551  
1.543  
1.537  
1.532

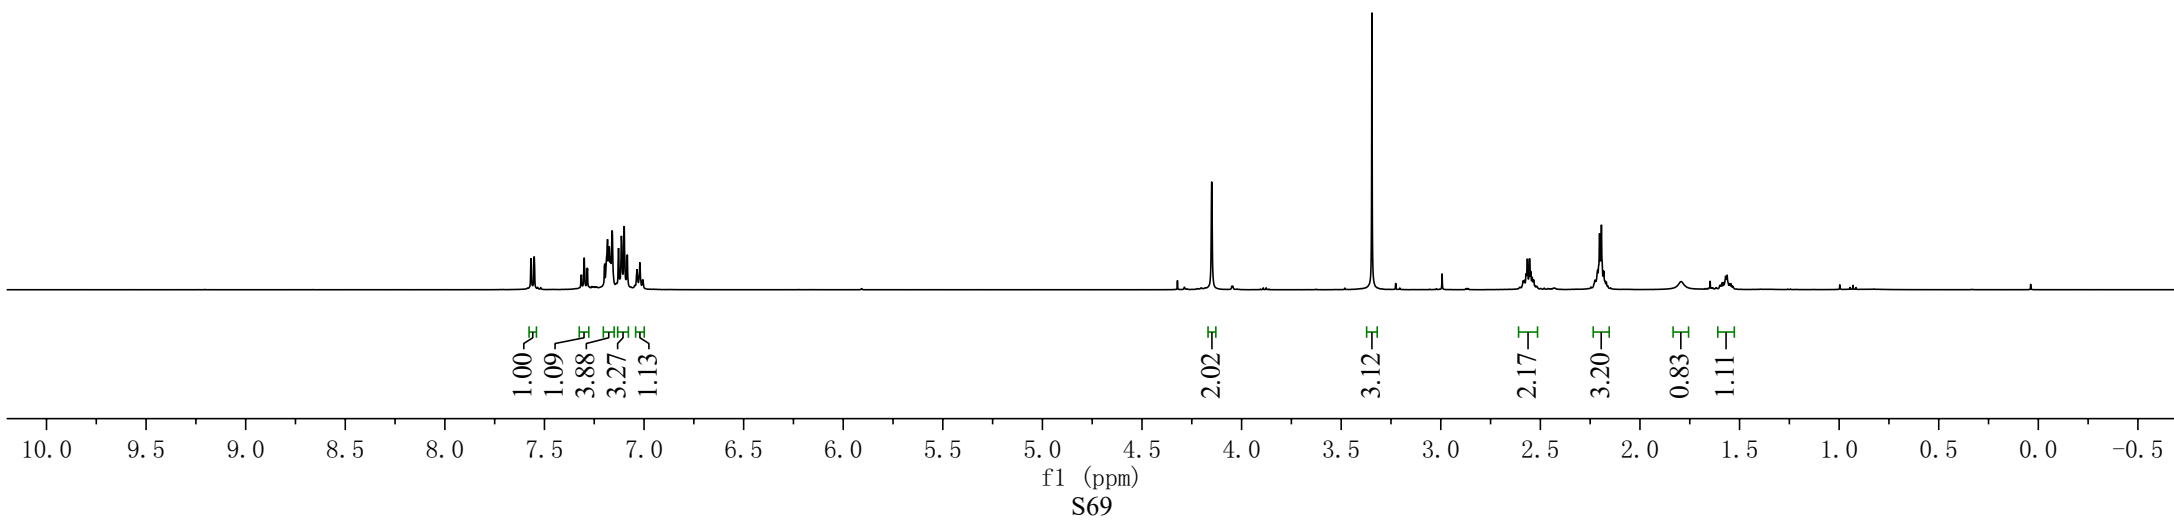

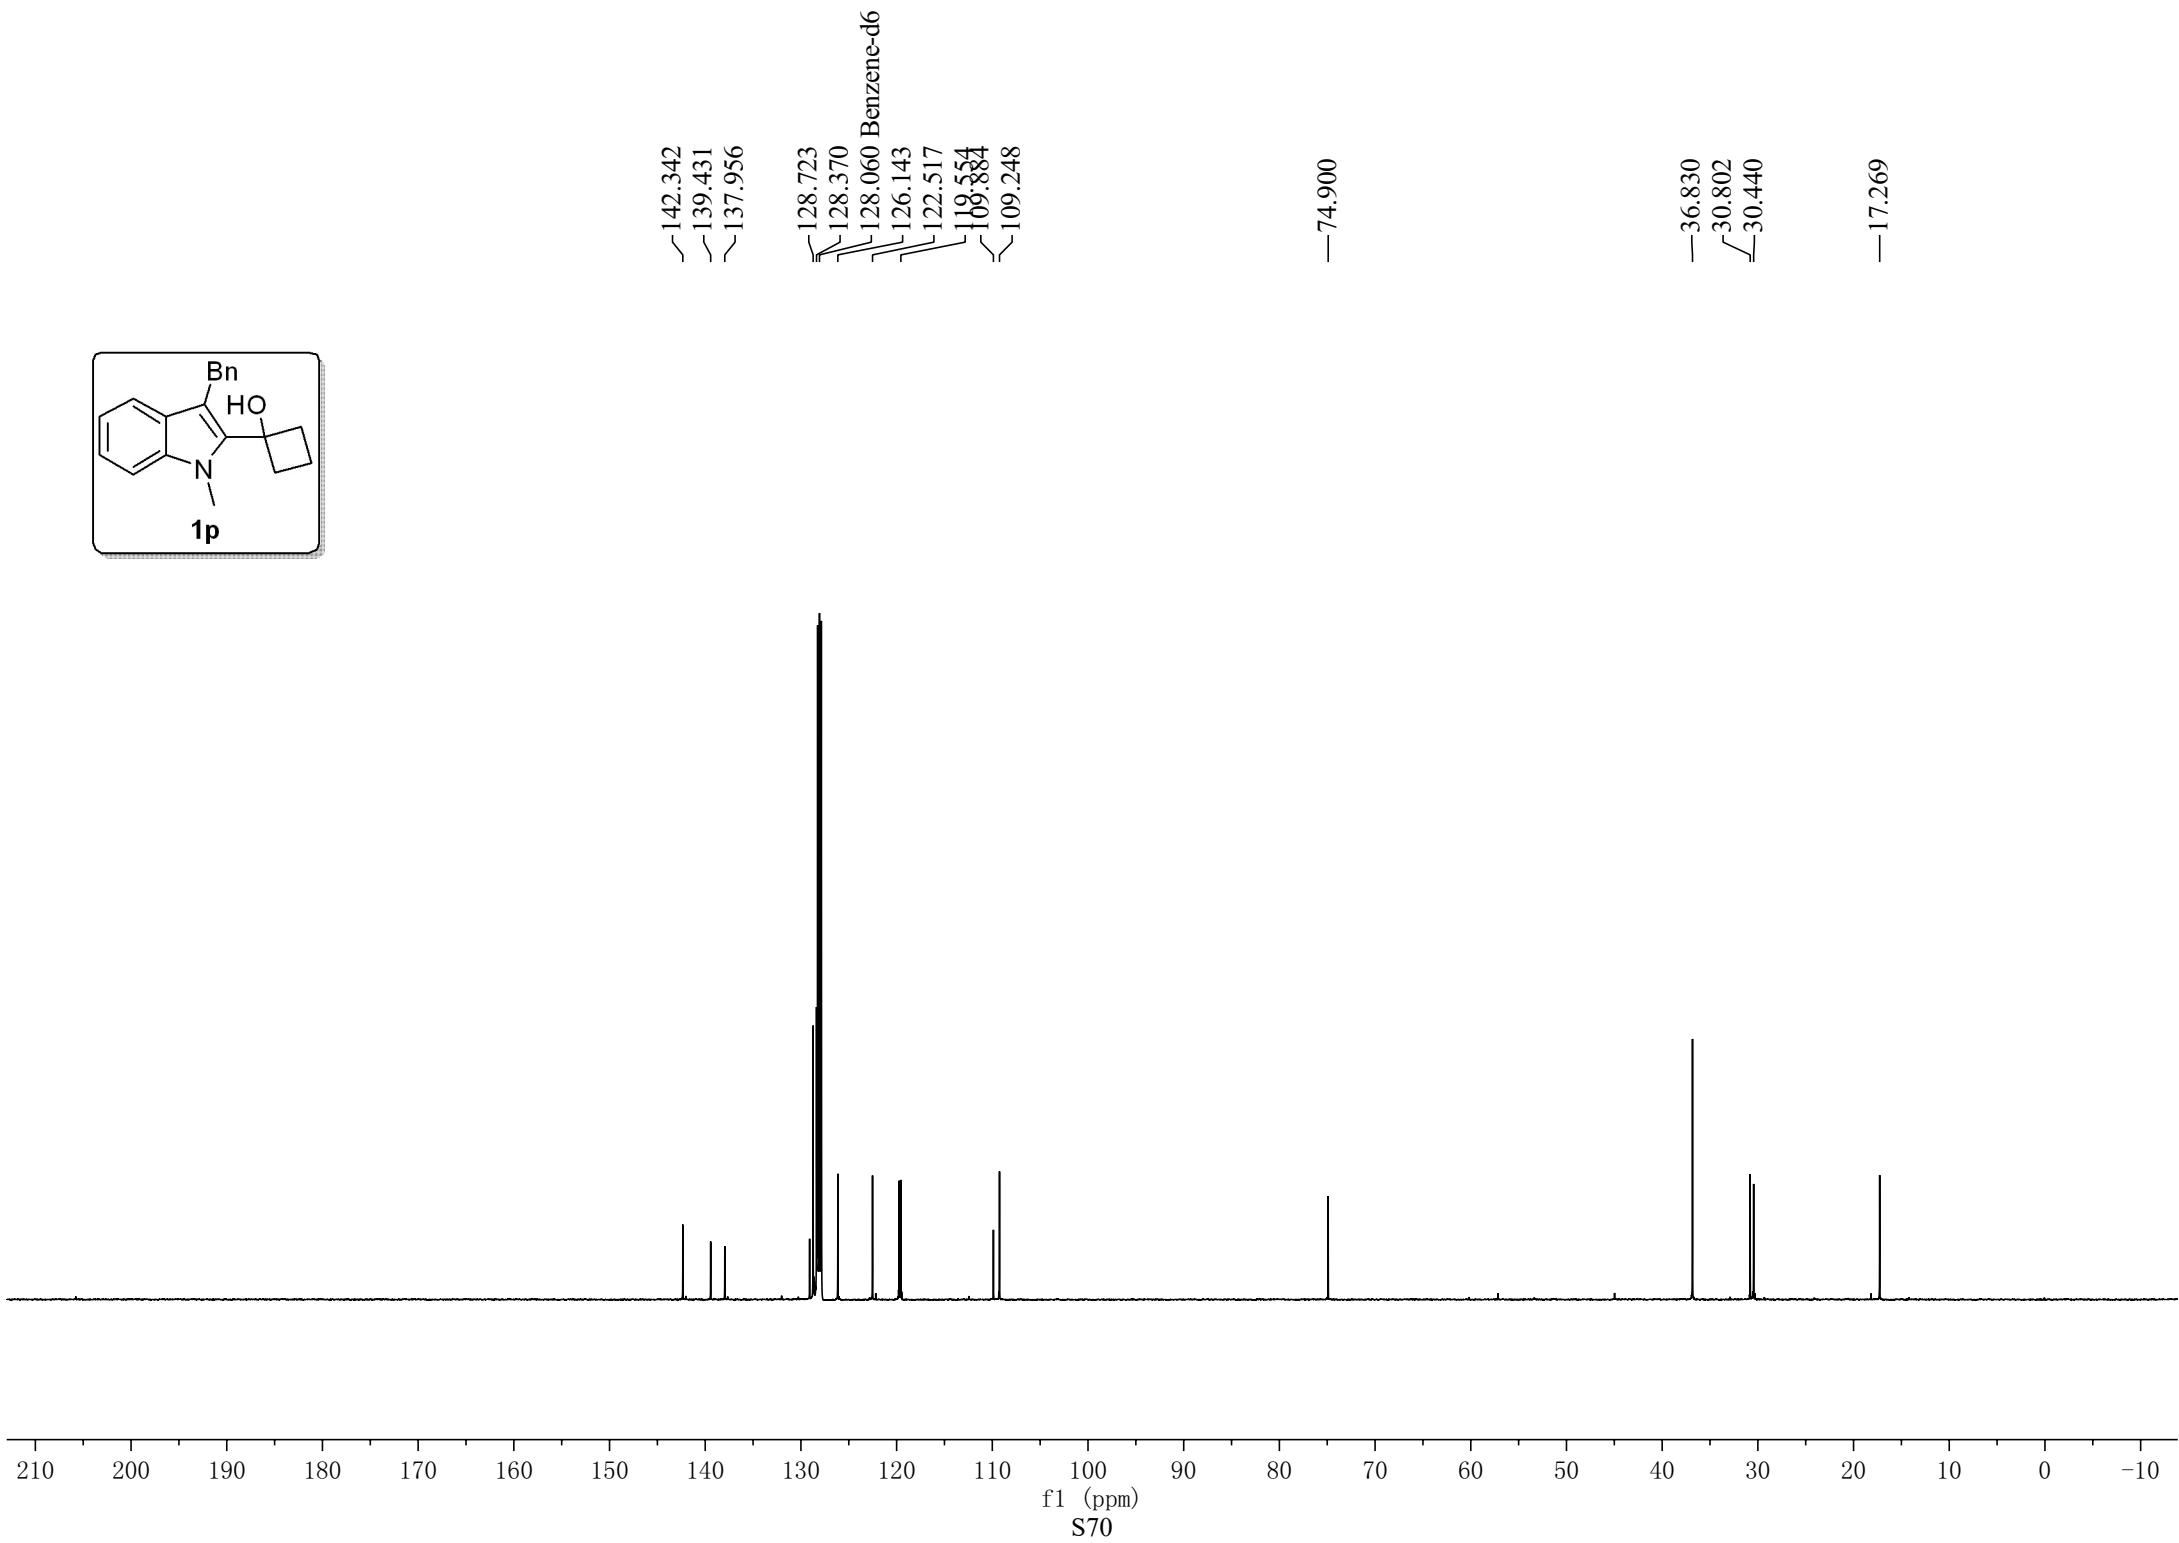

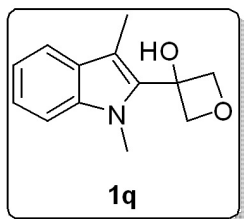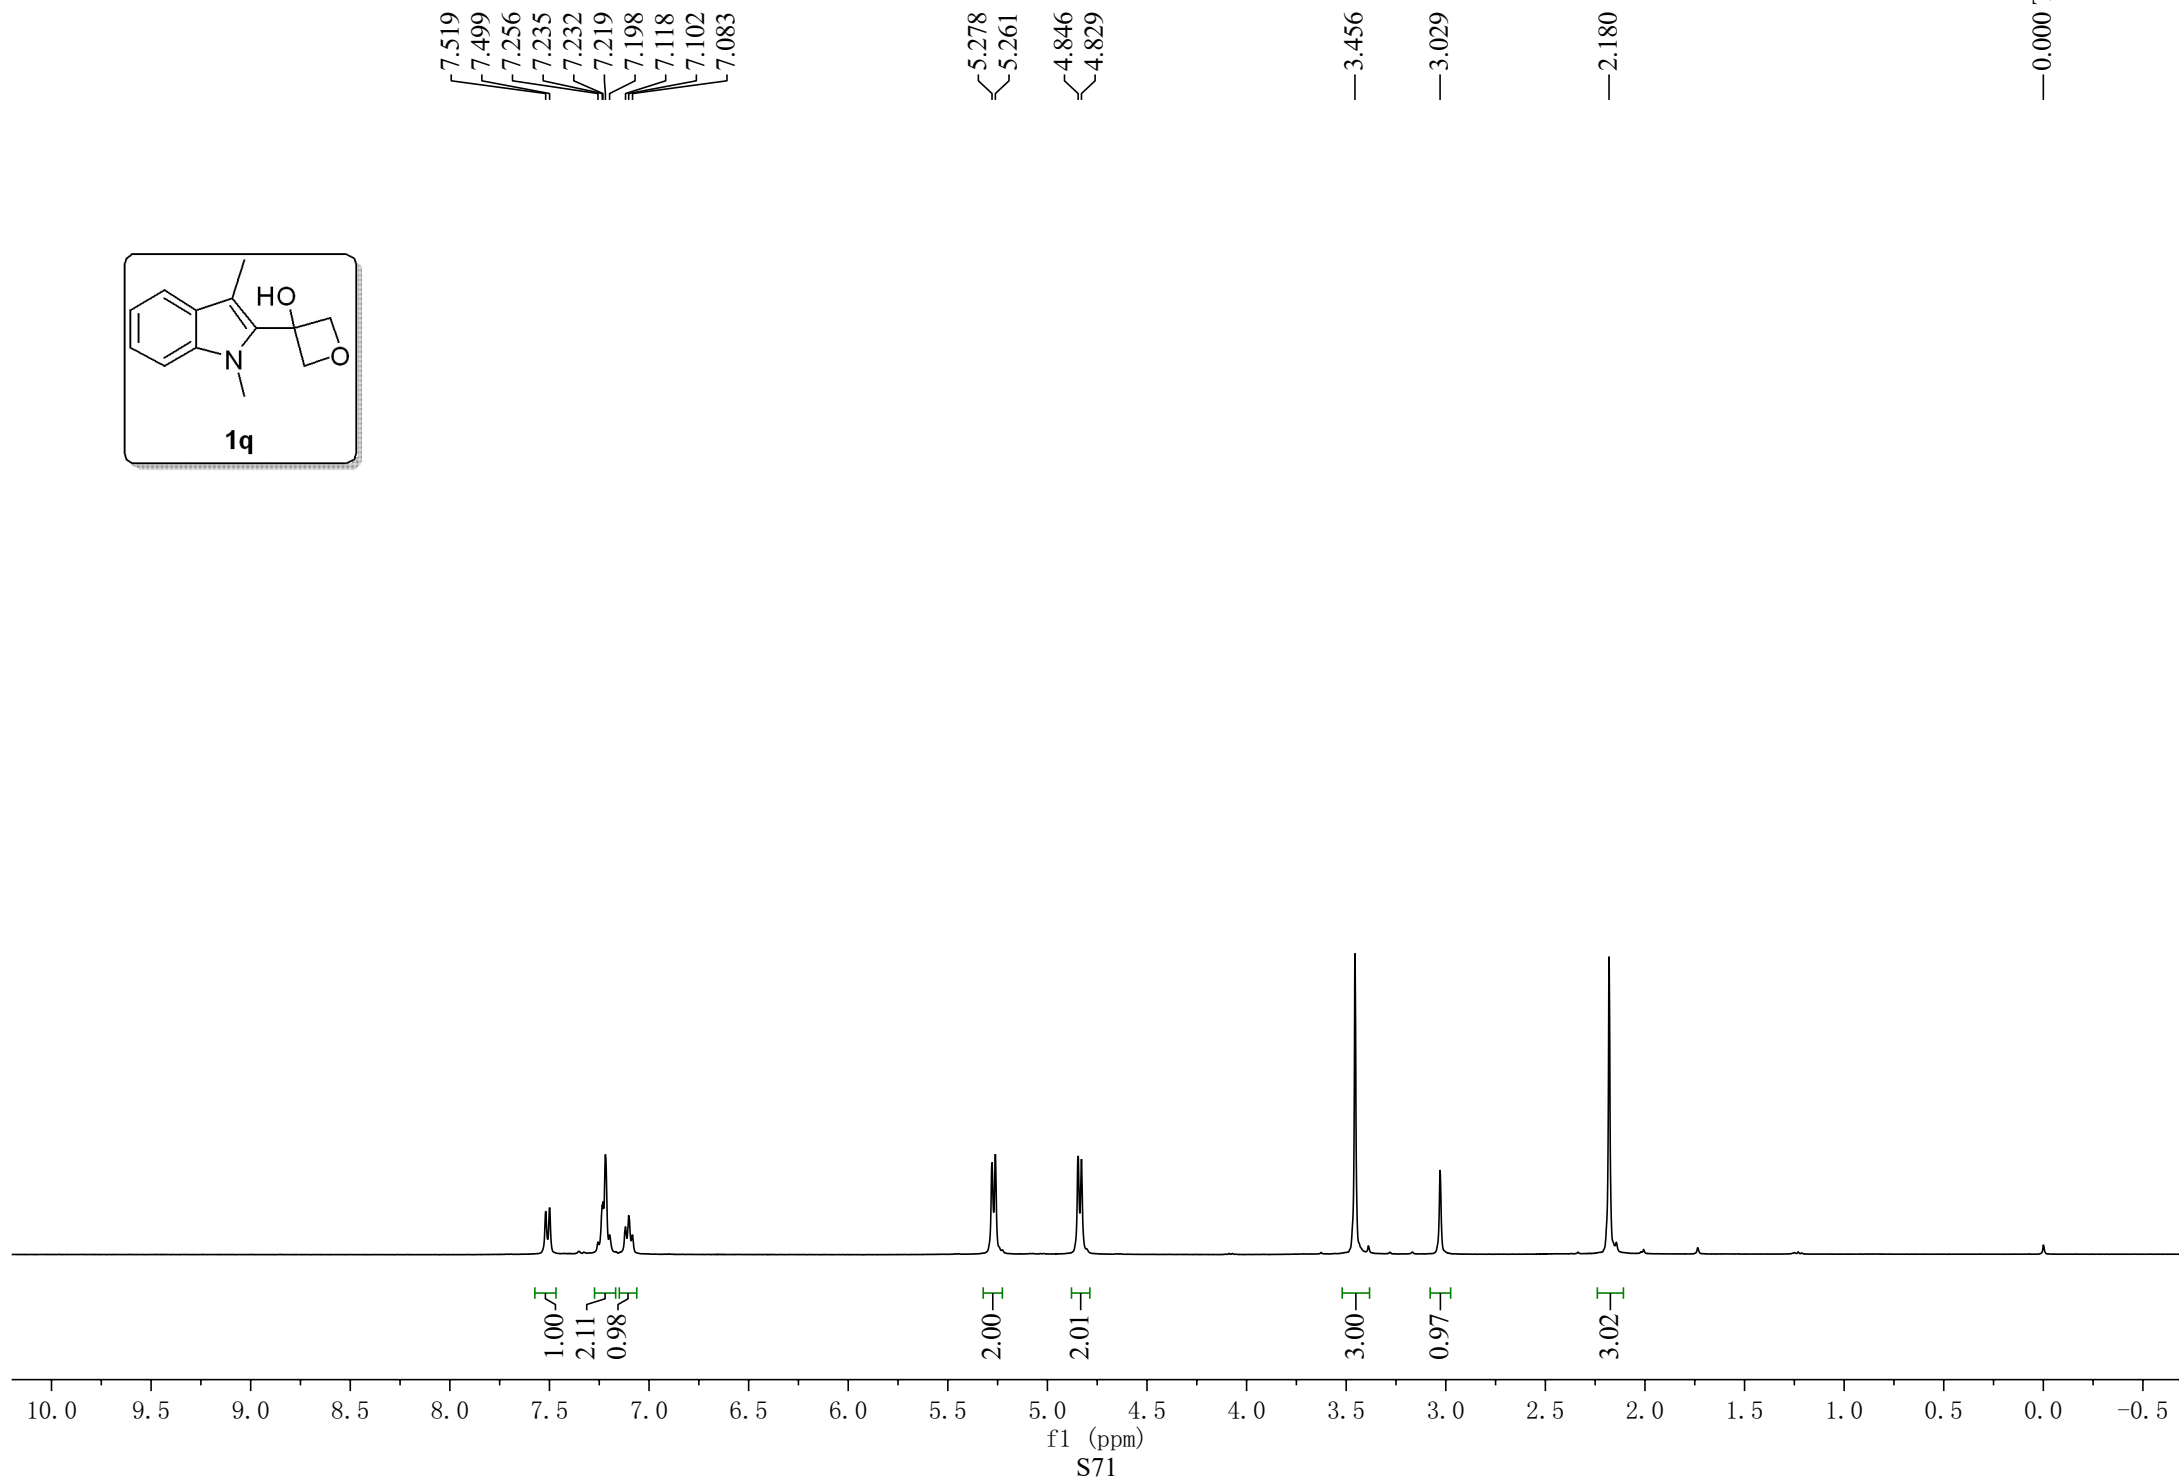

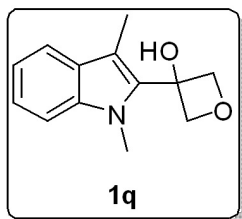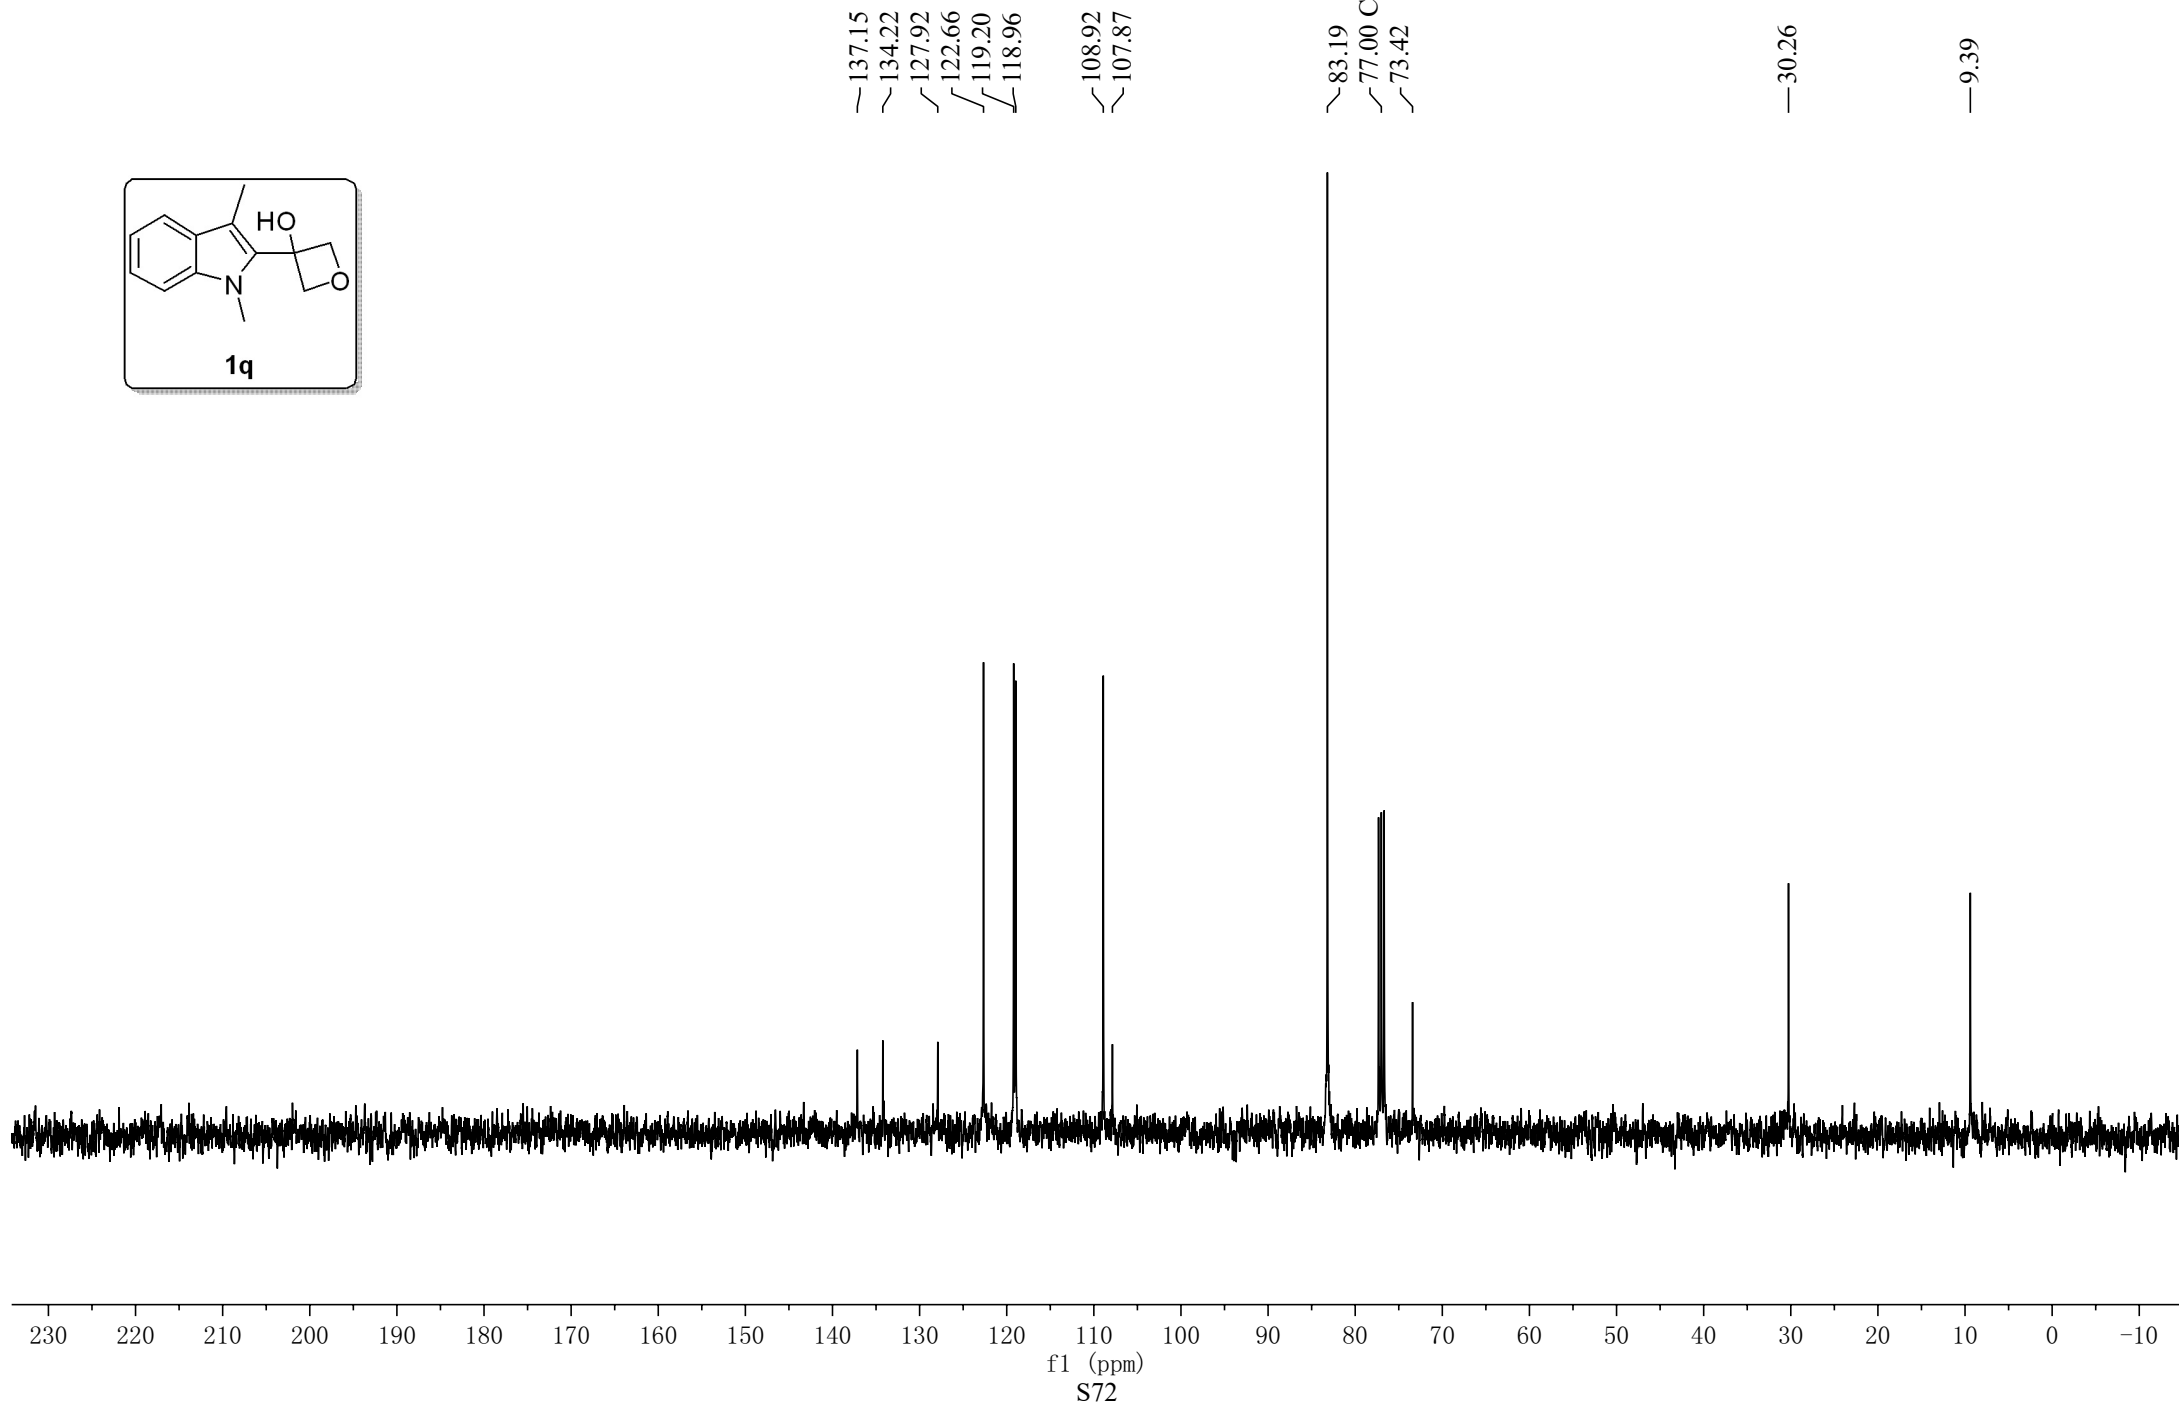

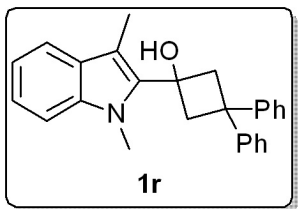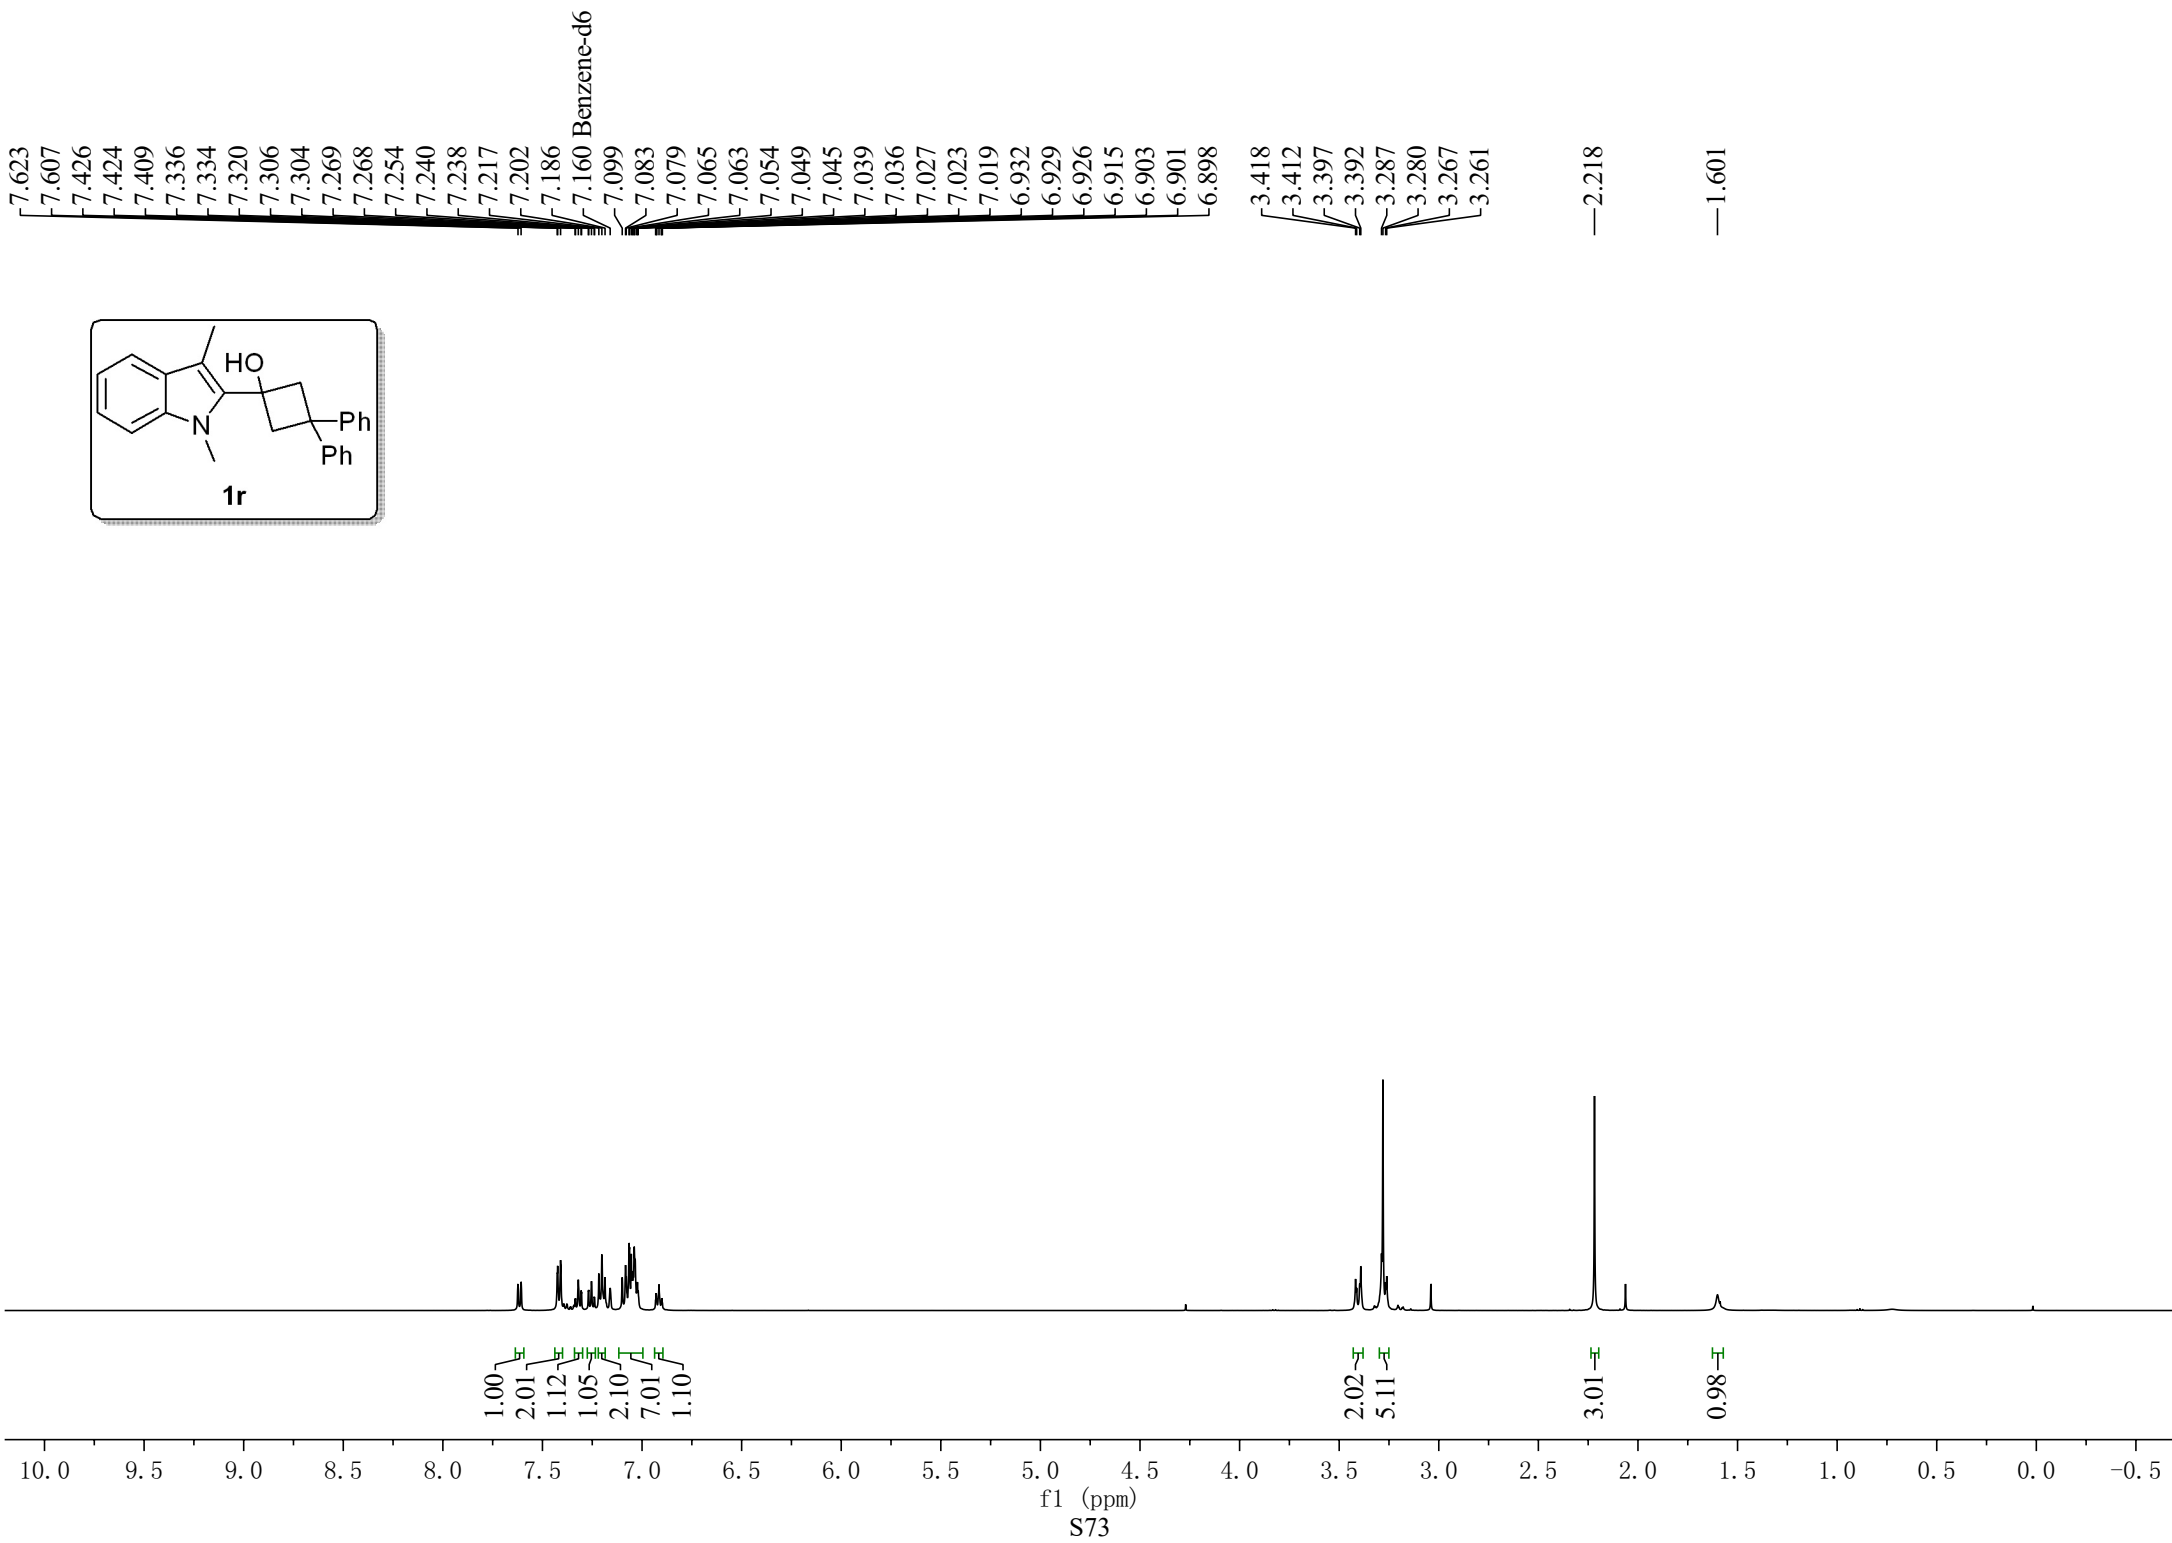

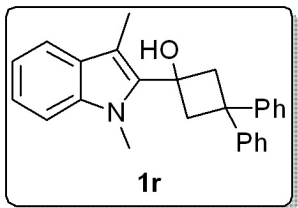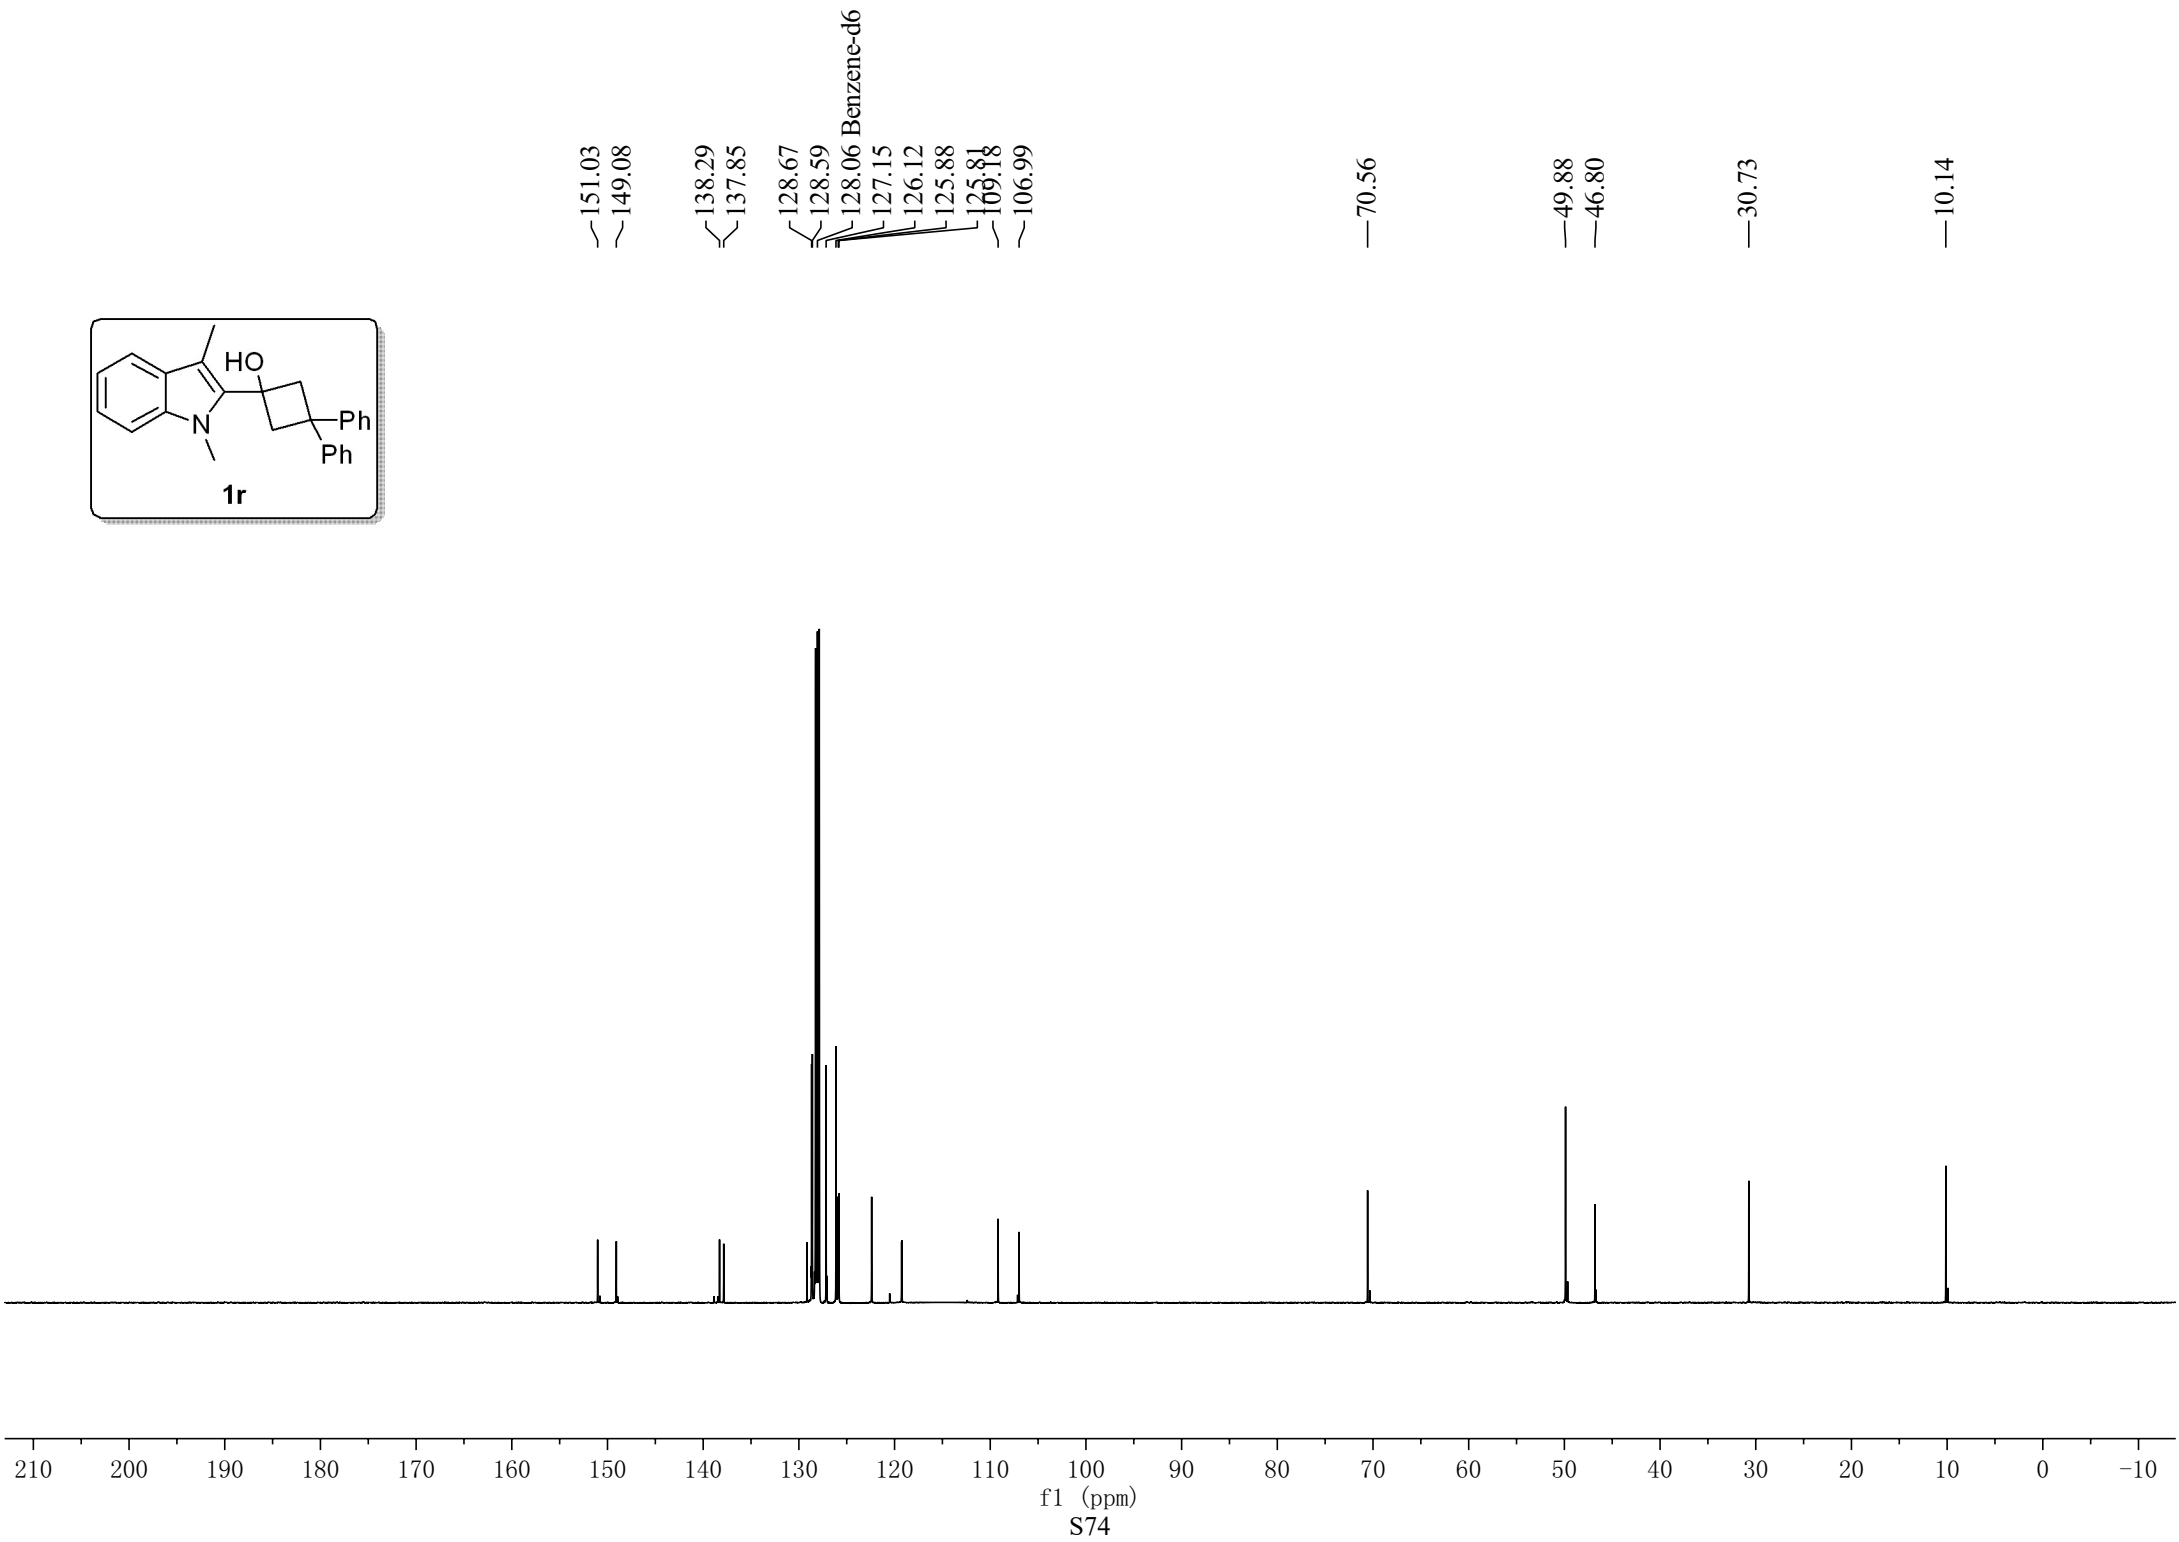

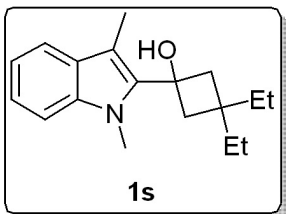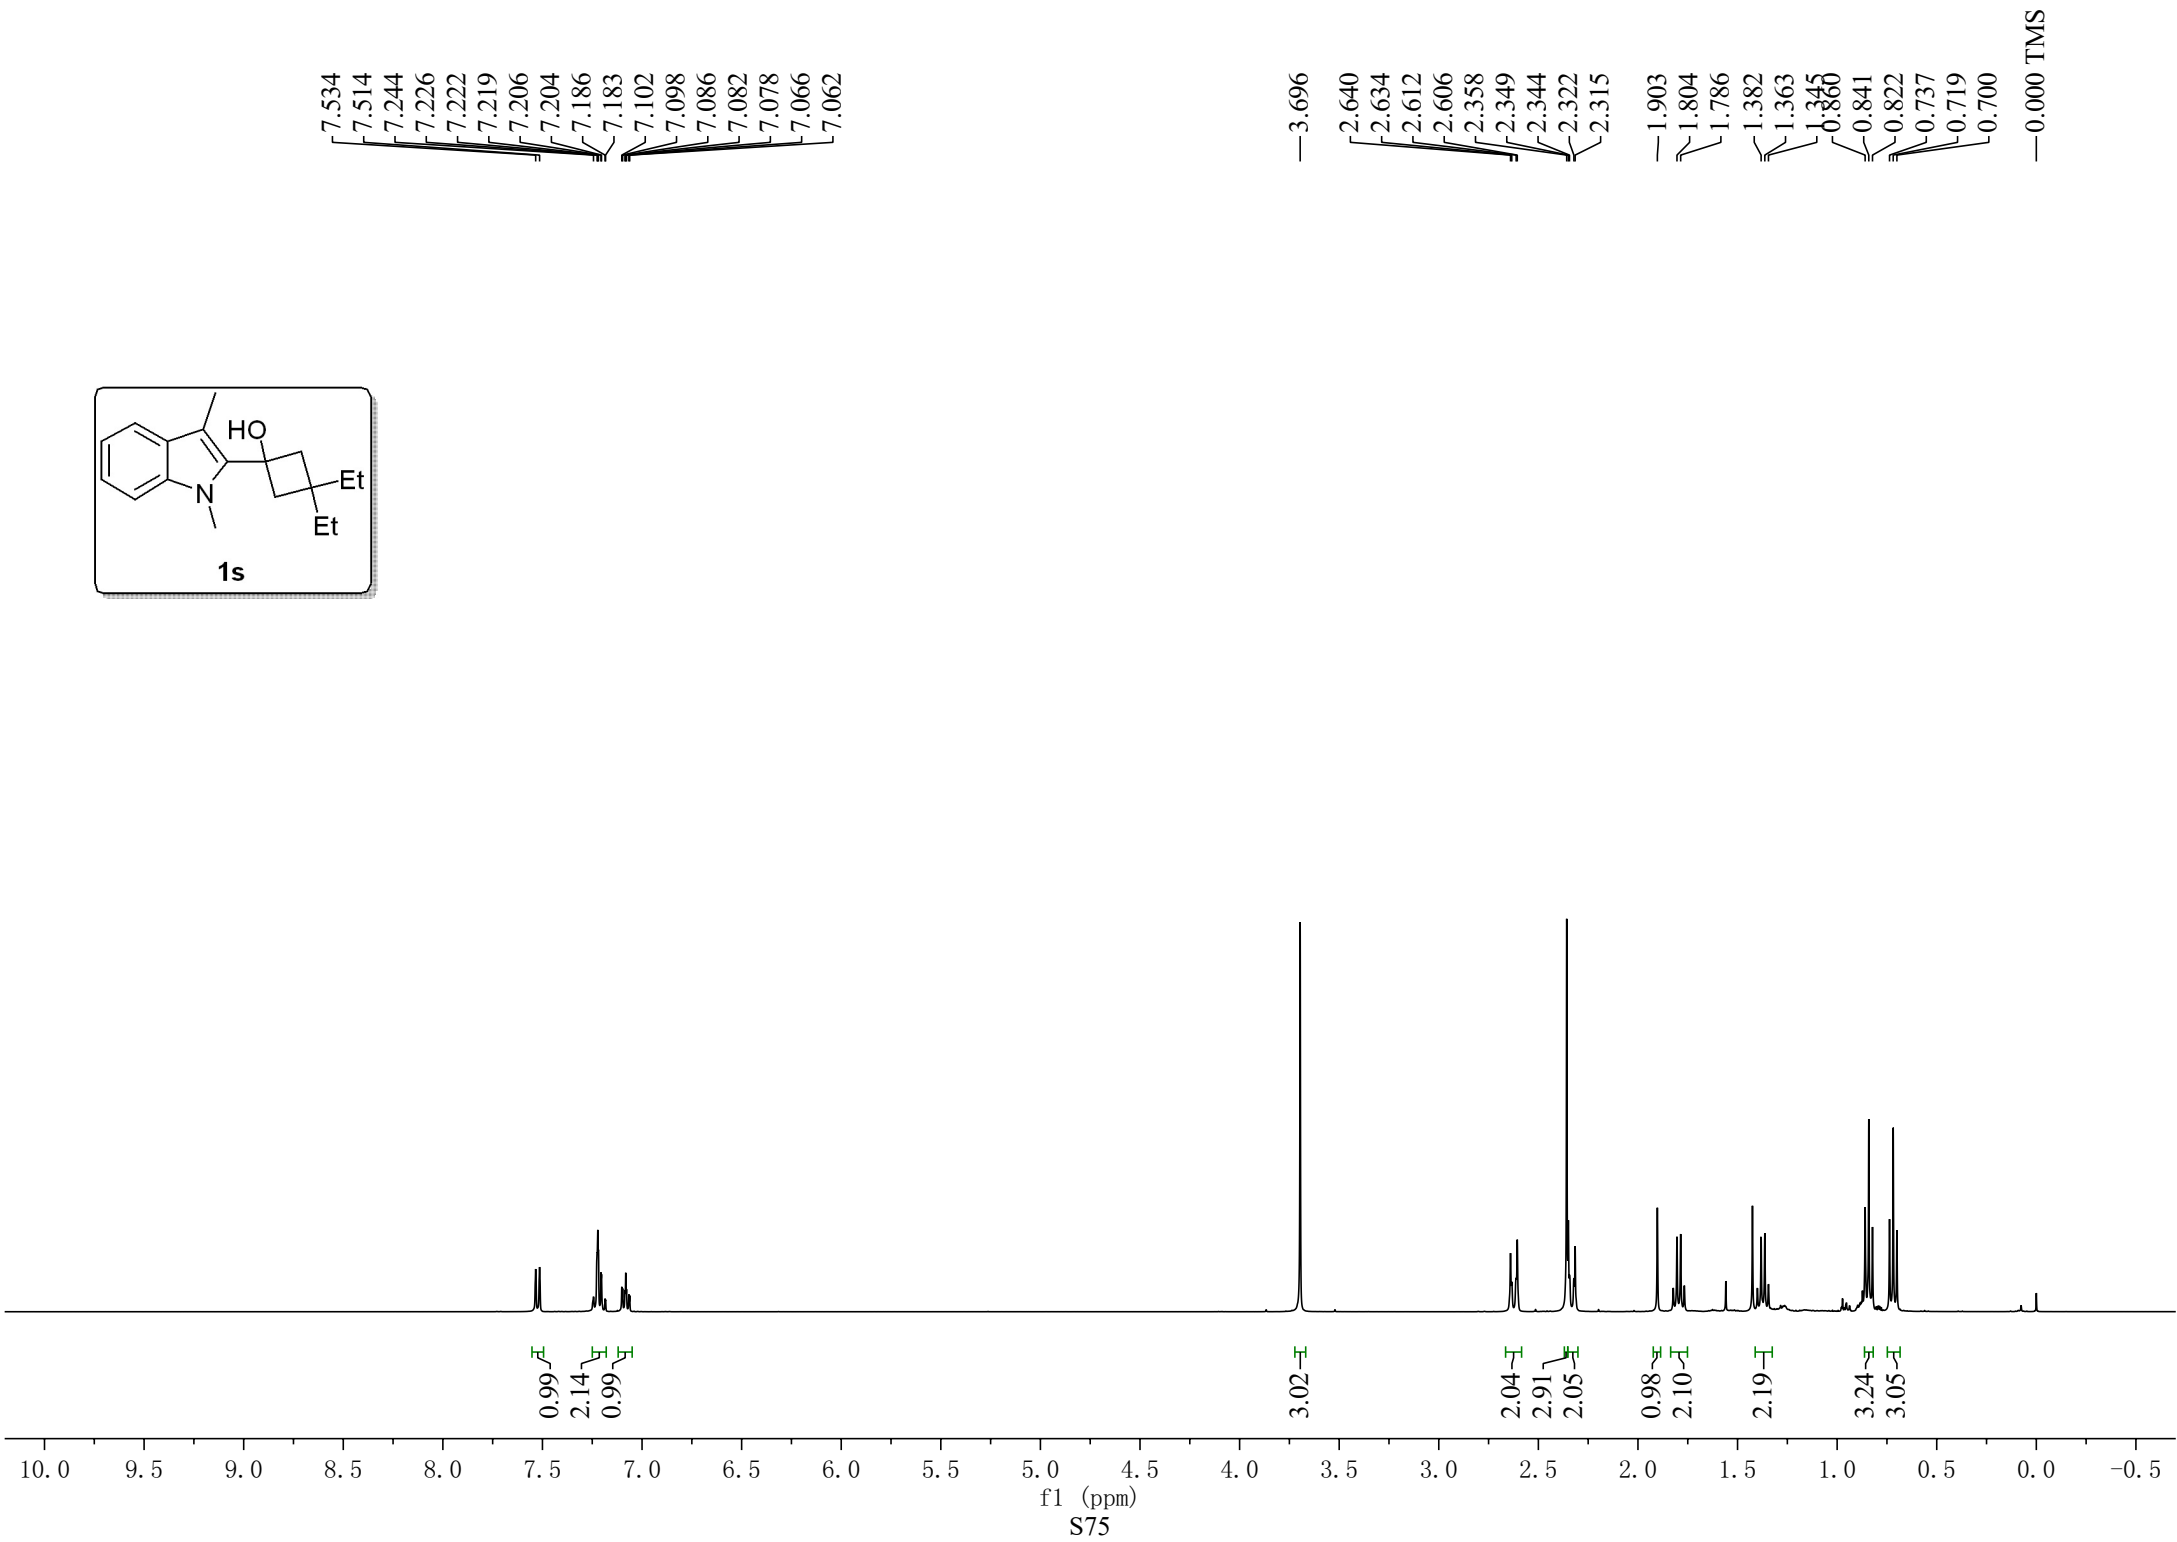

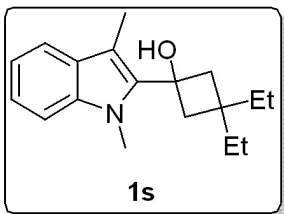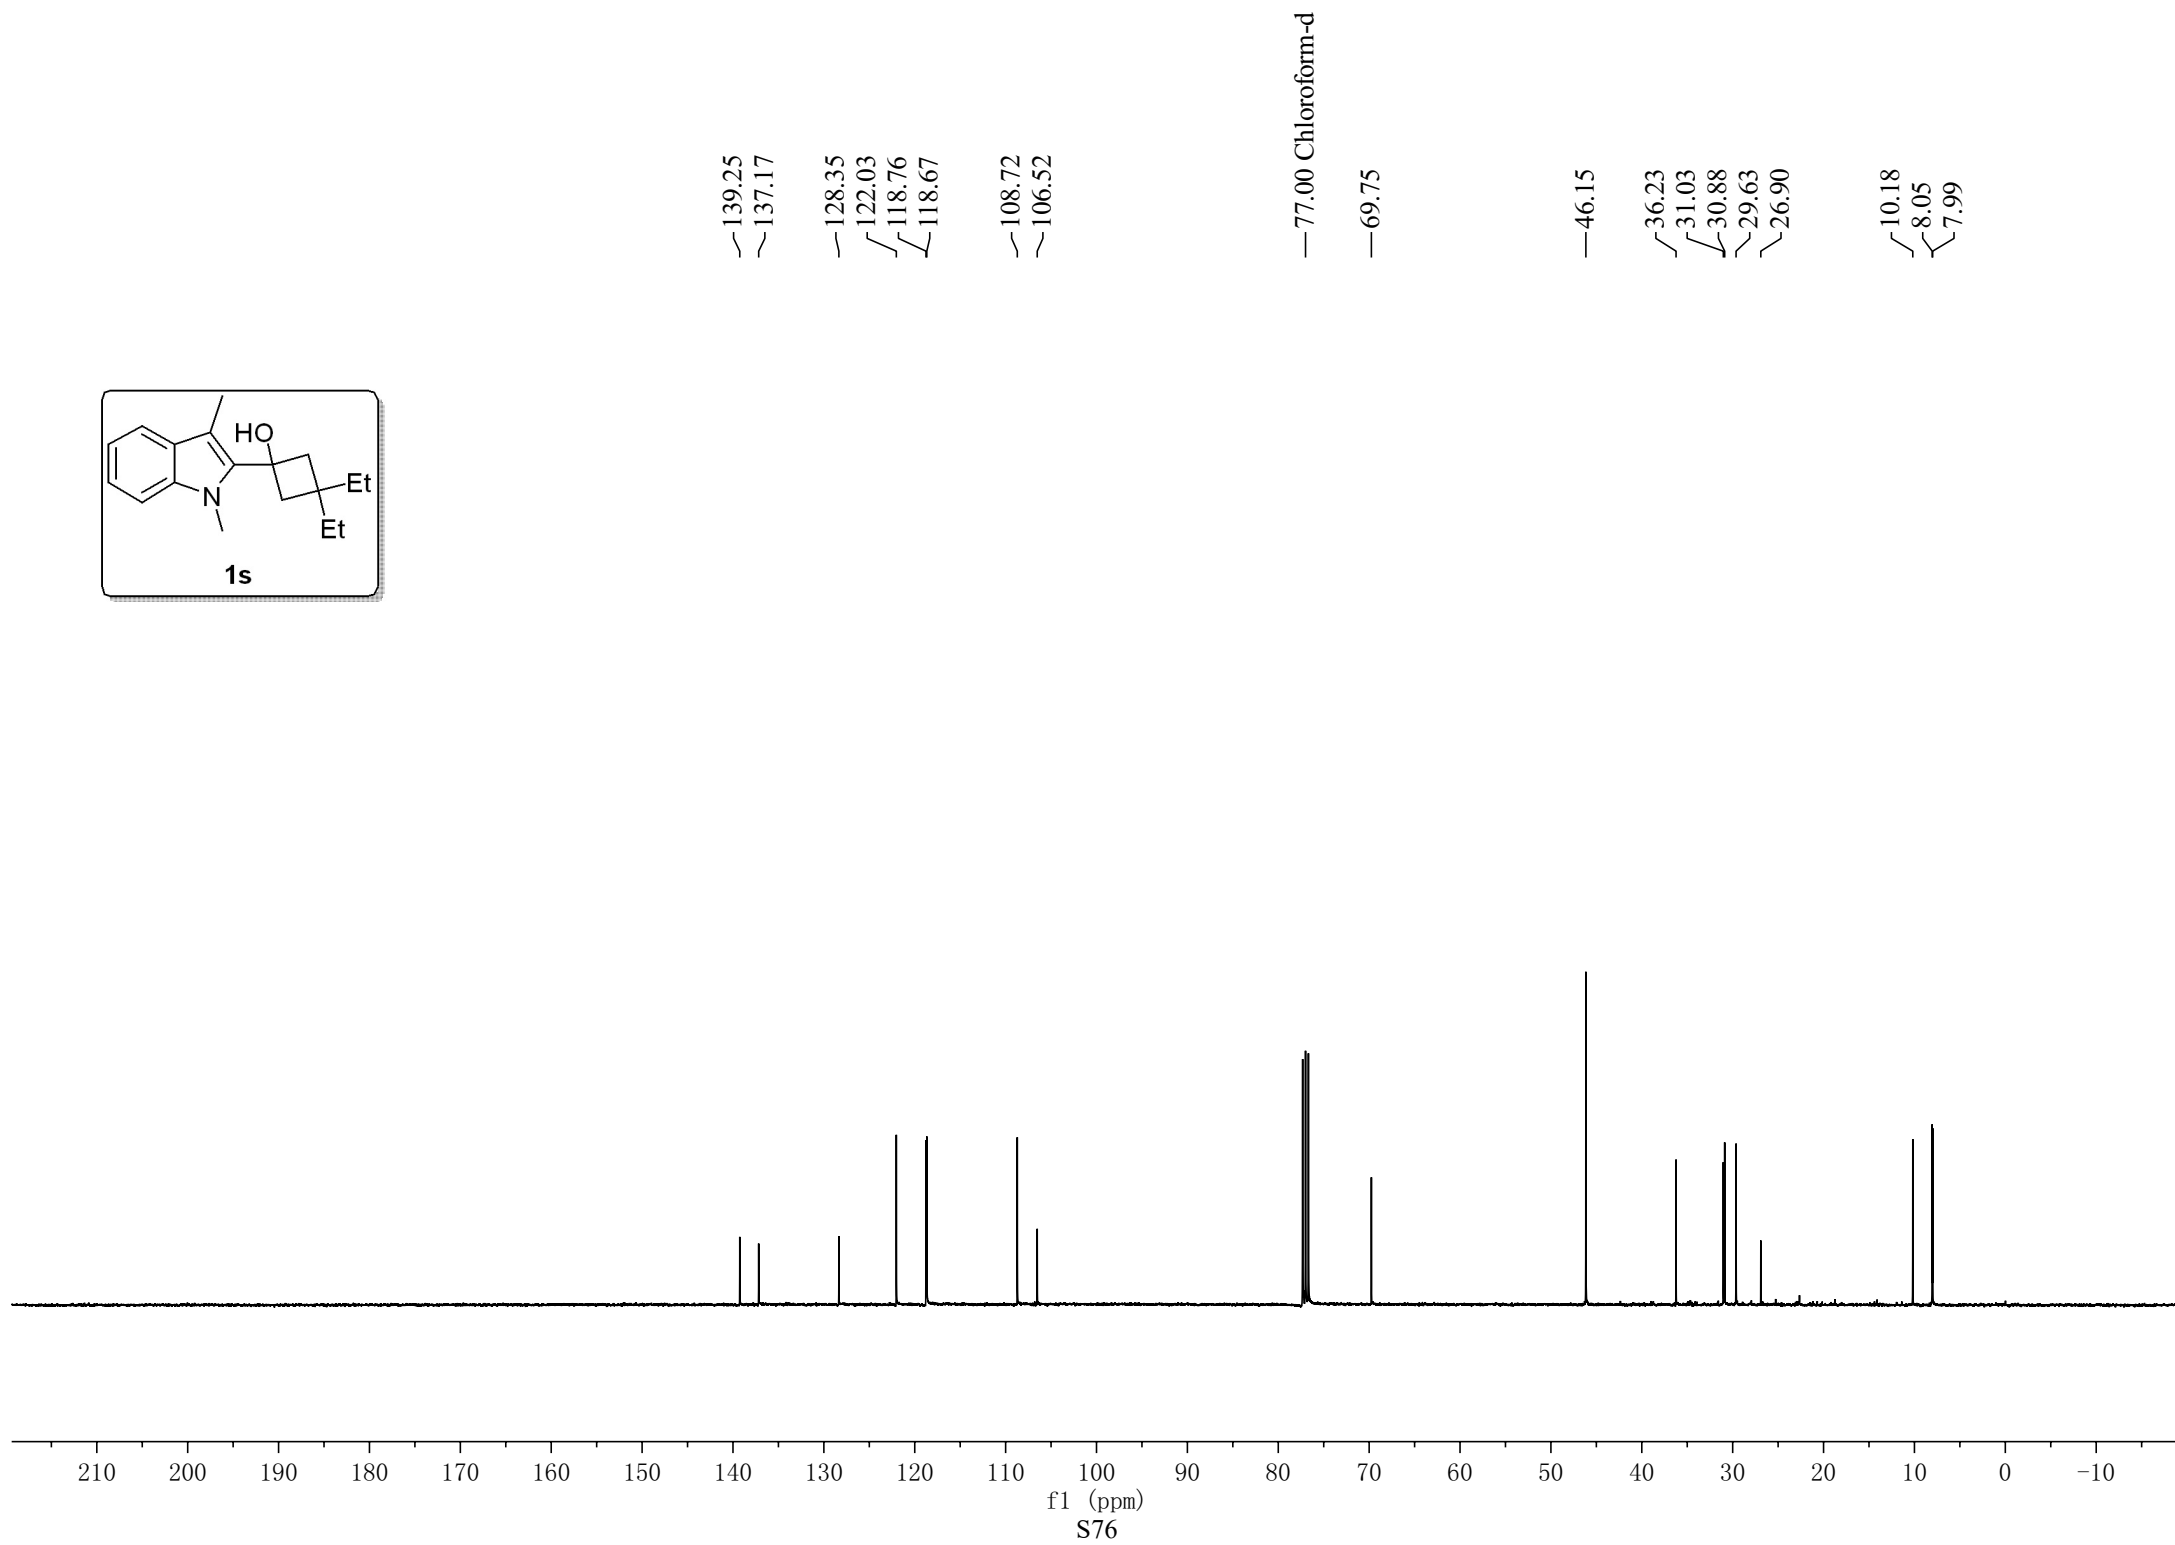



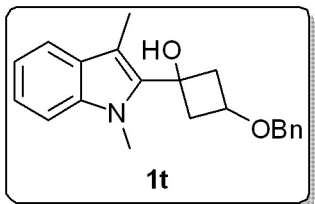

7.576  
7.561  
7.270  
7.268  
7.257  
7.255  
7.241  
7.210  
7.208  
7.194  
7.180  
7.178  
7.174  
7.171  
7.160 Benzene-d6  
7.160  
7.144  
7.102  
7.087  
7.083  
7.072  
7.040  
7.024

4.176  
3.559  
3.547  
3.268  
3.061  
2.903  
2.890  
2.883  
2.877  
2.864  
2.368  
2.361  
2.357  
2.349  
2.342  
2.337  
2.331  
2.256

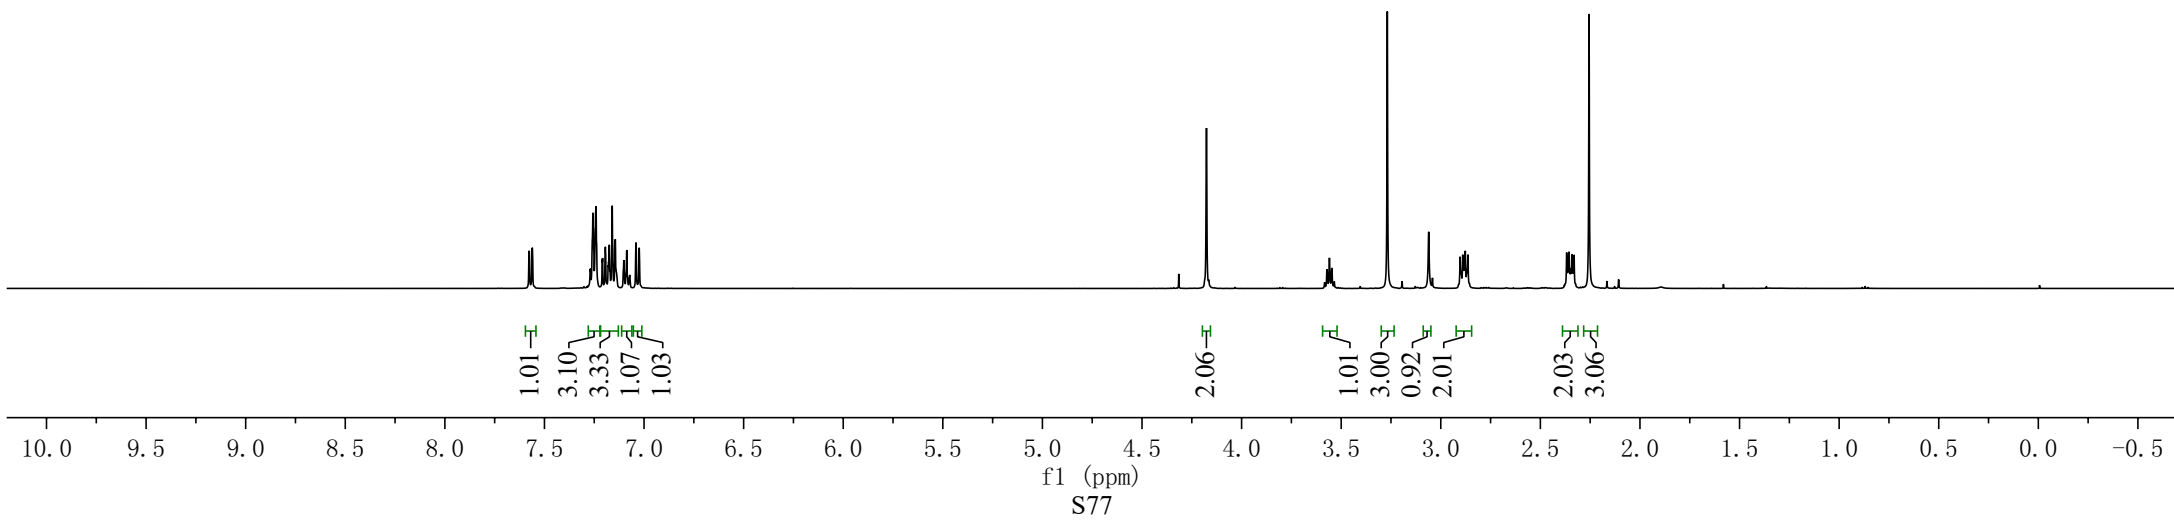

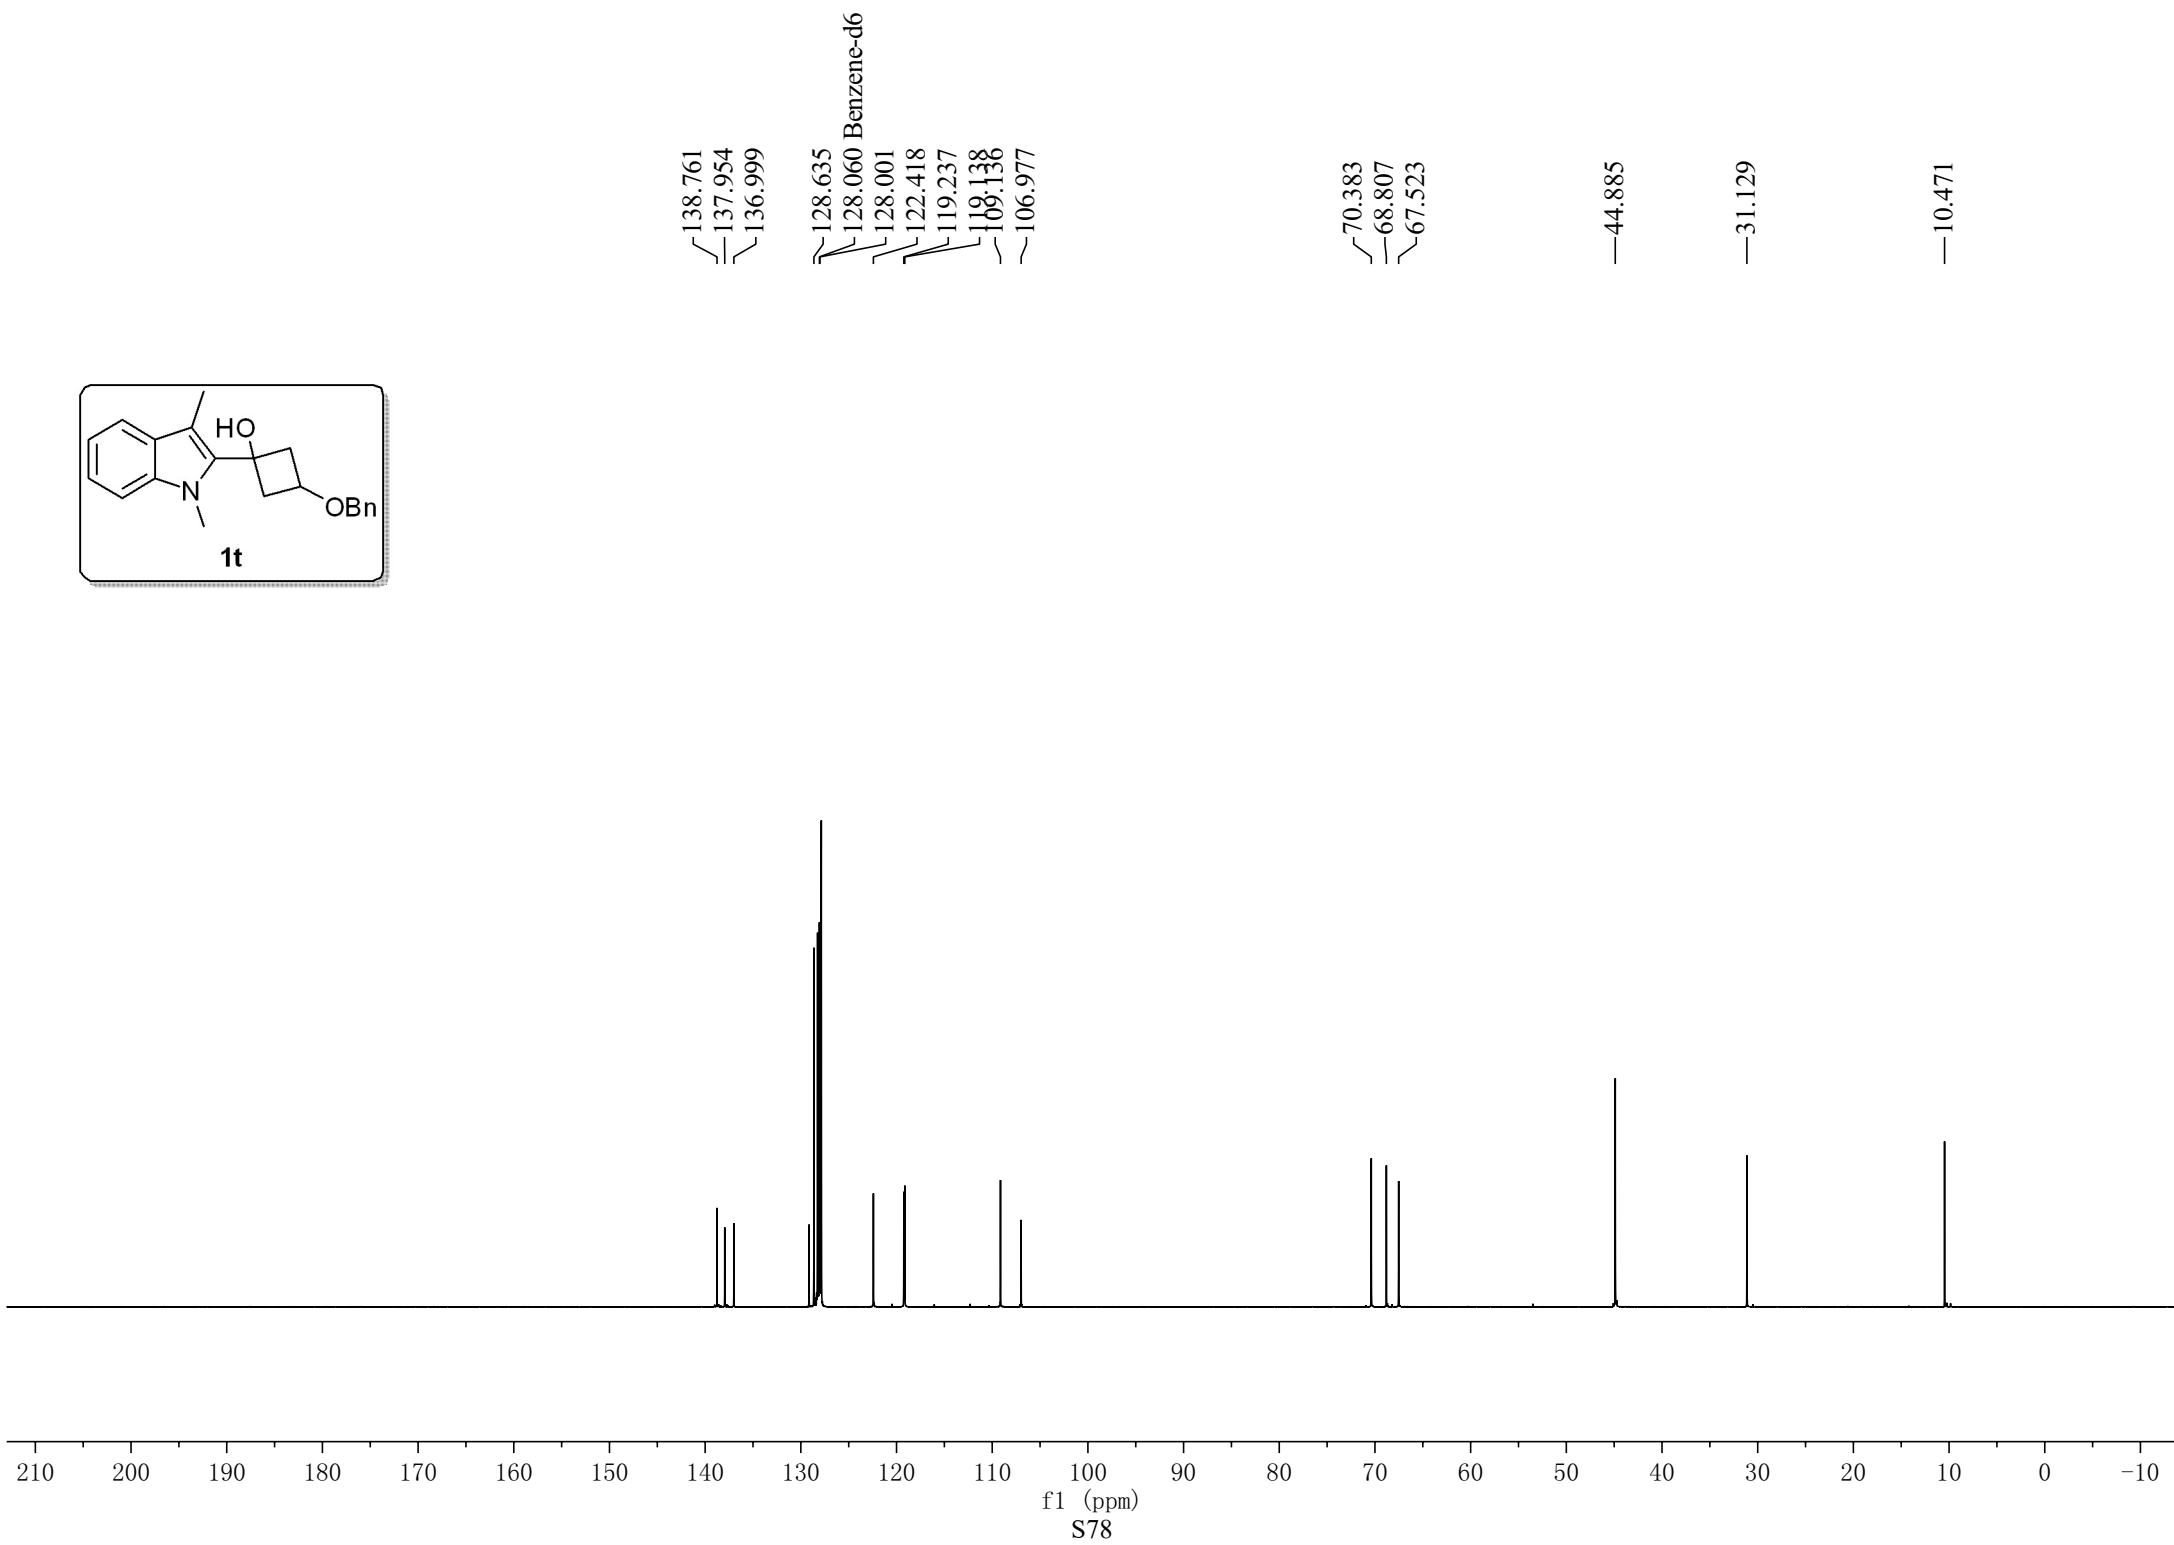

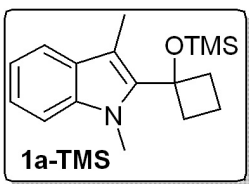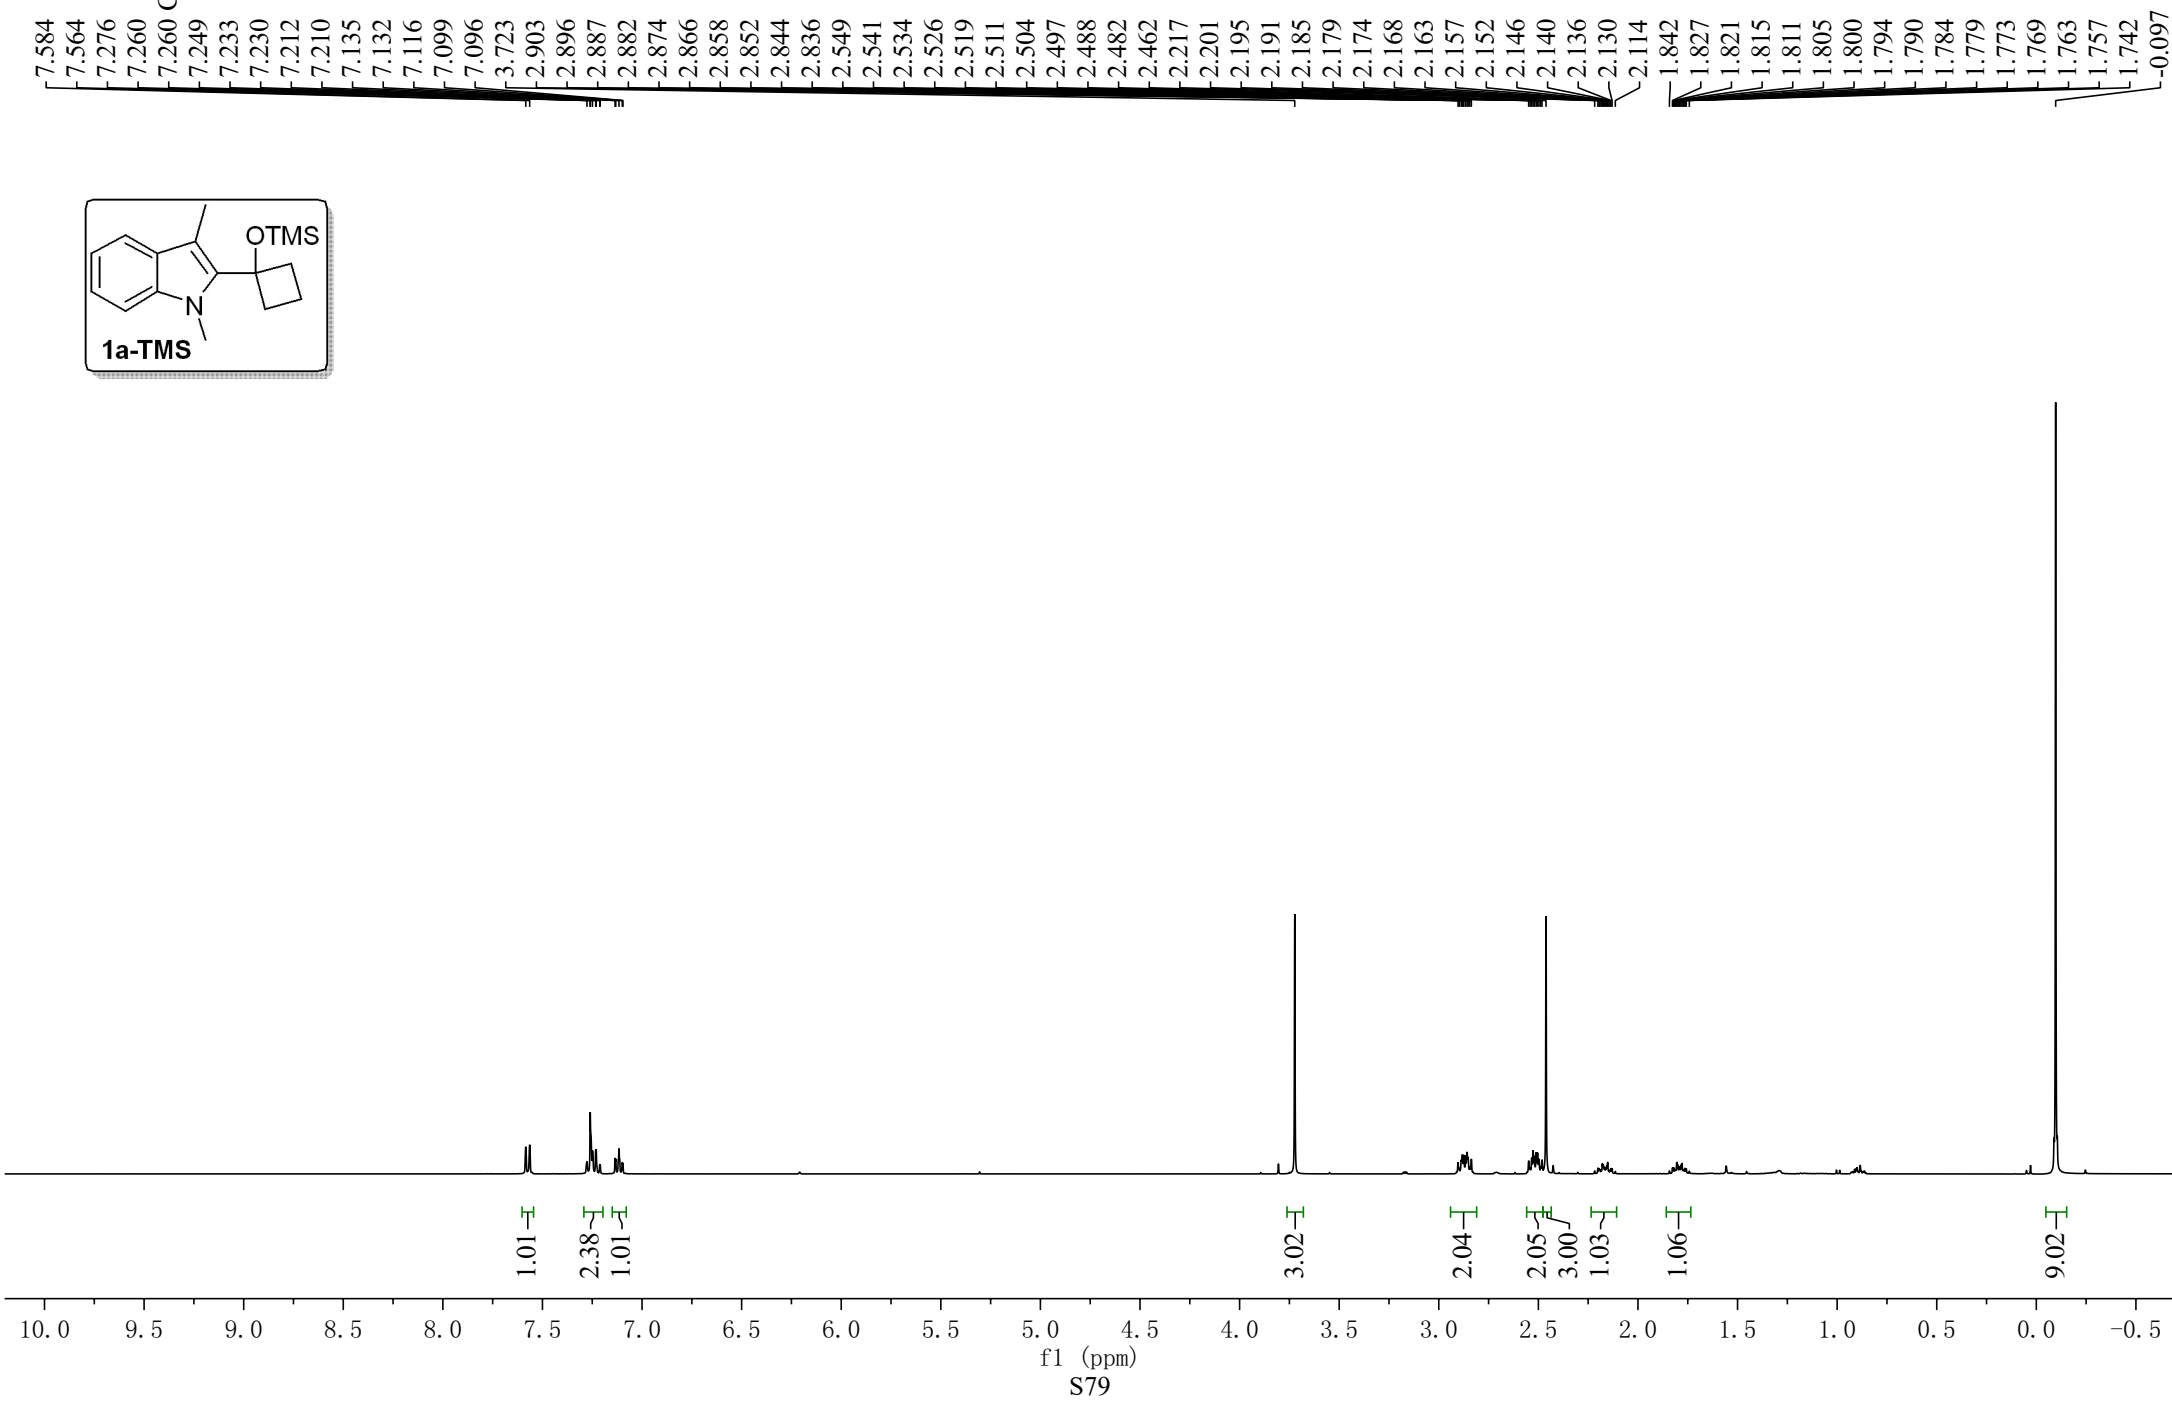

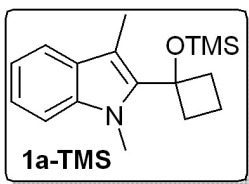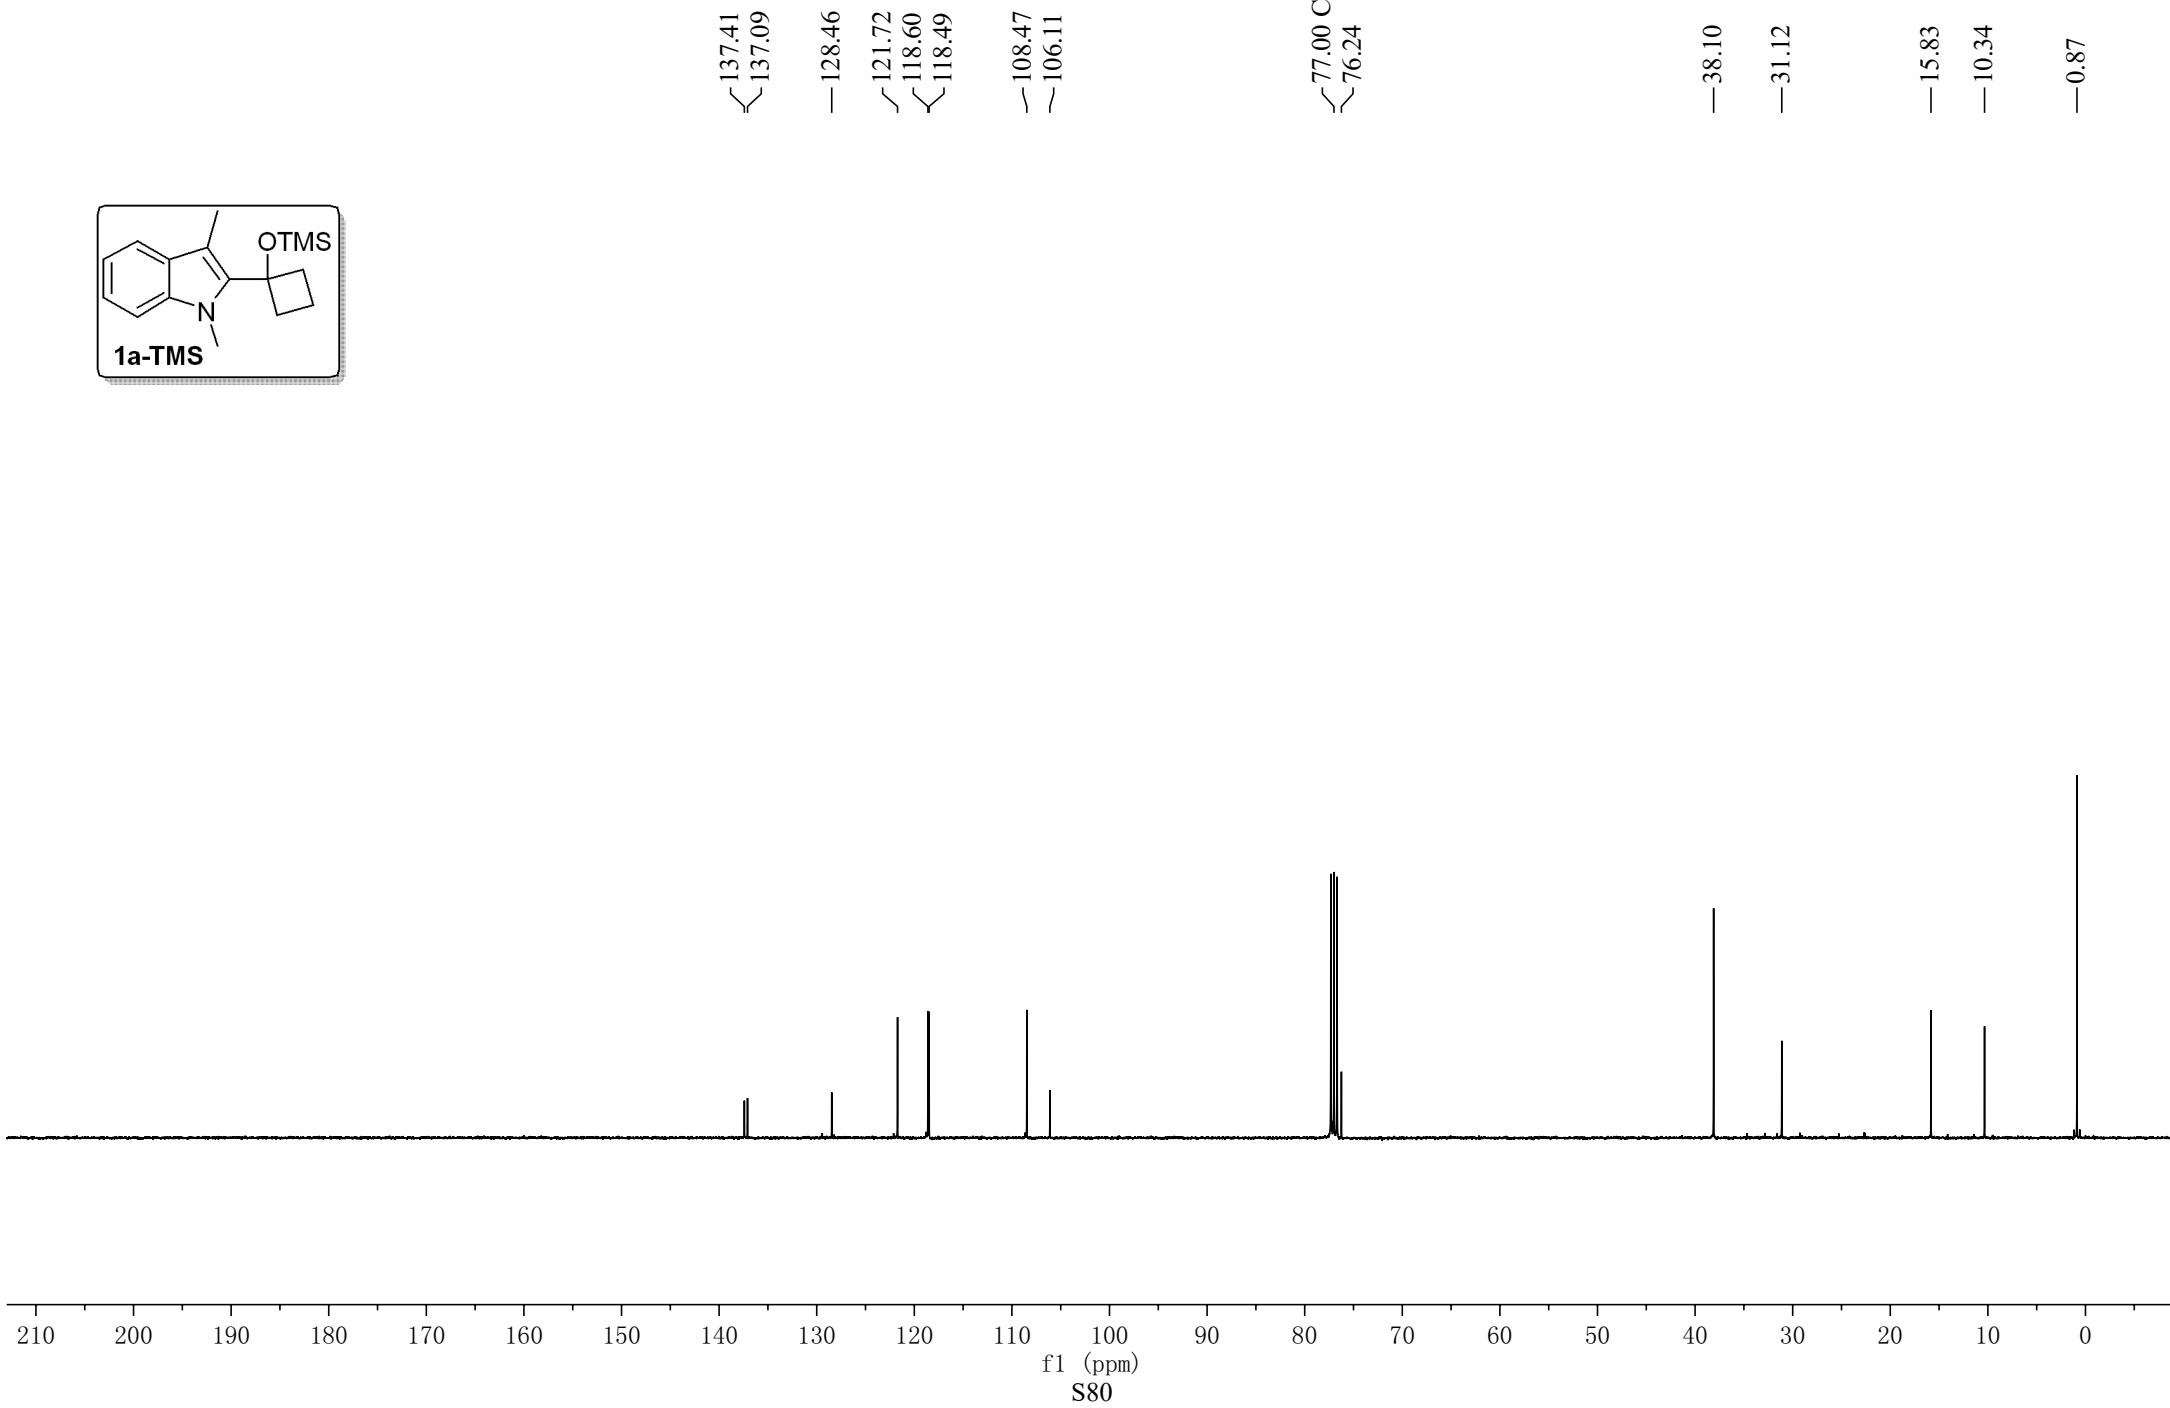

7.260 Chloroform-d

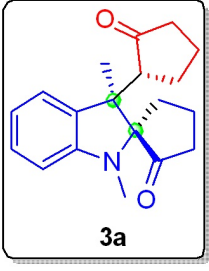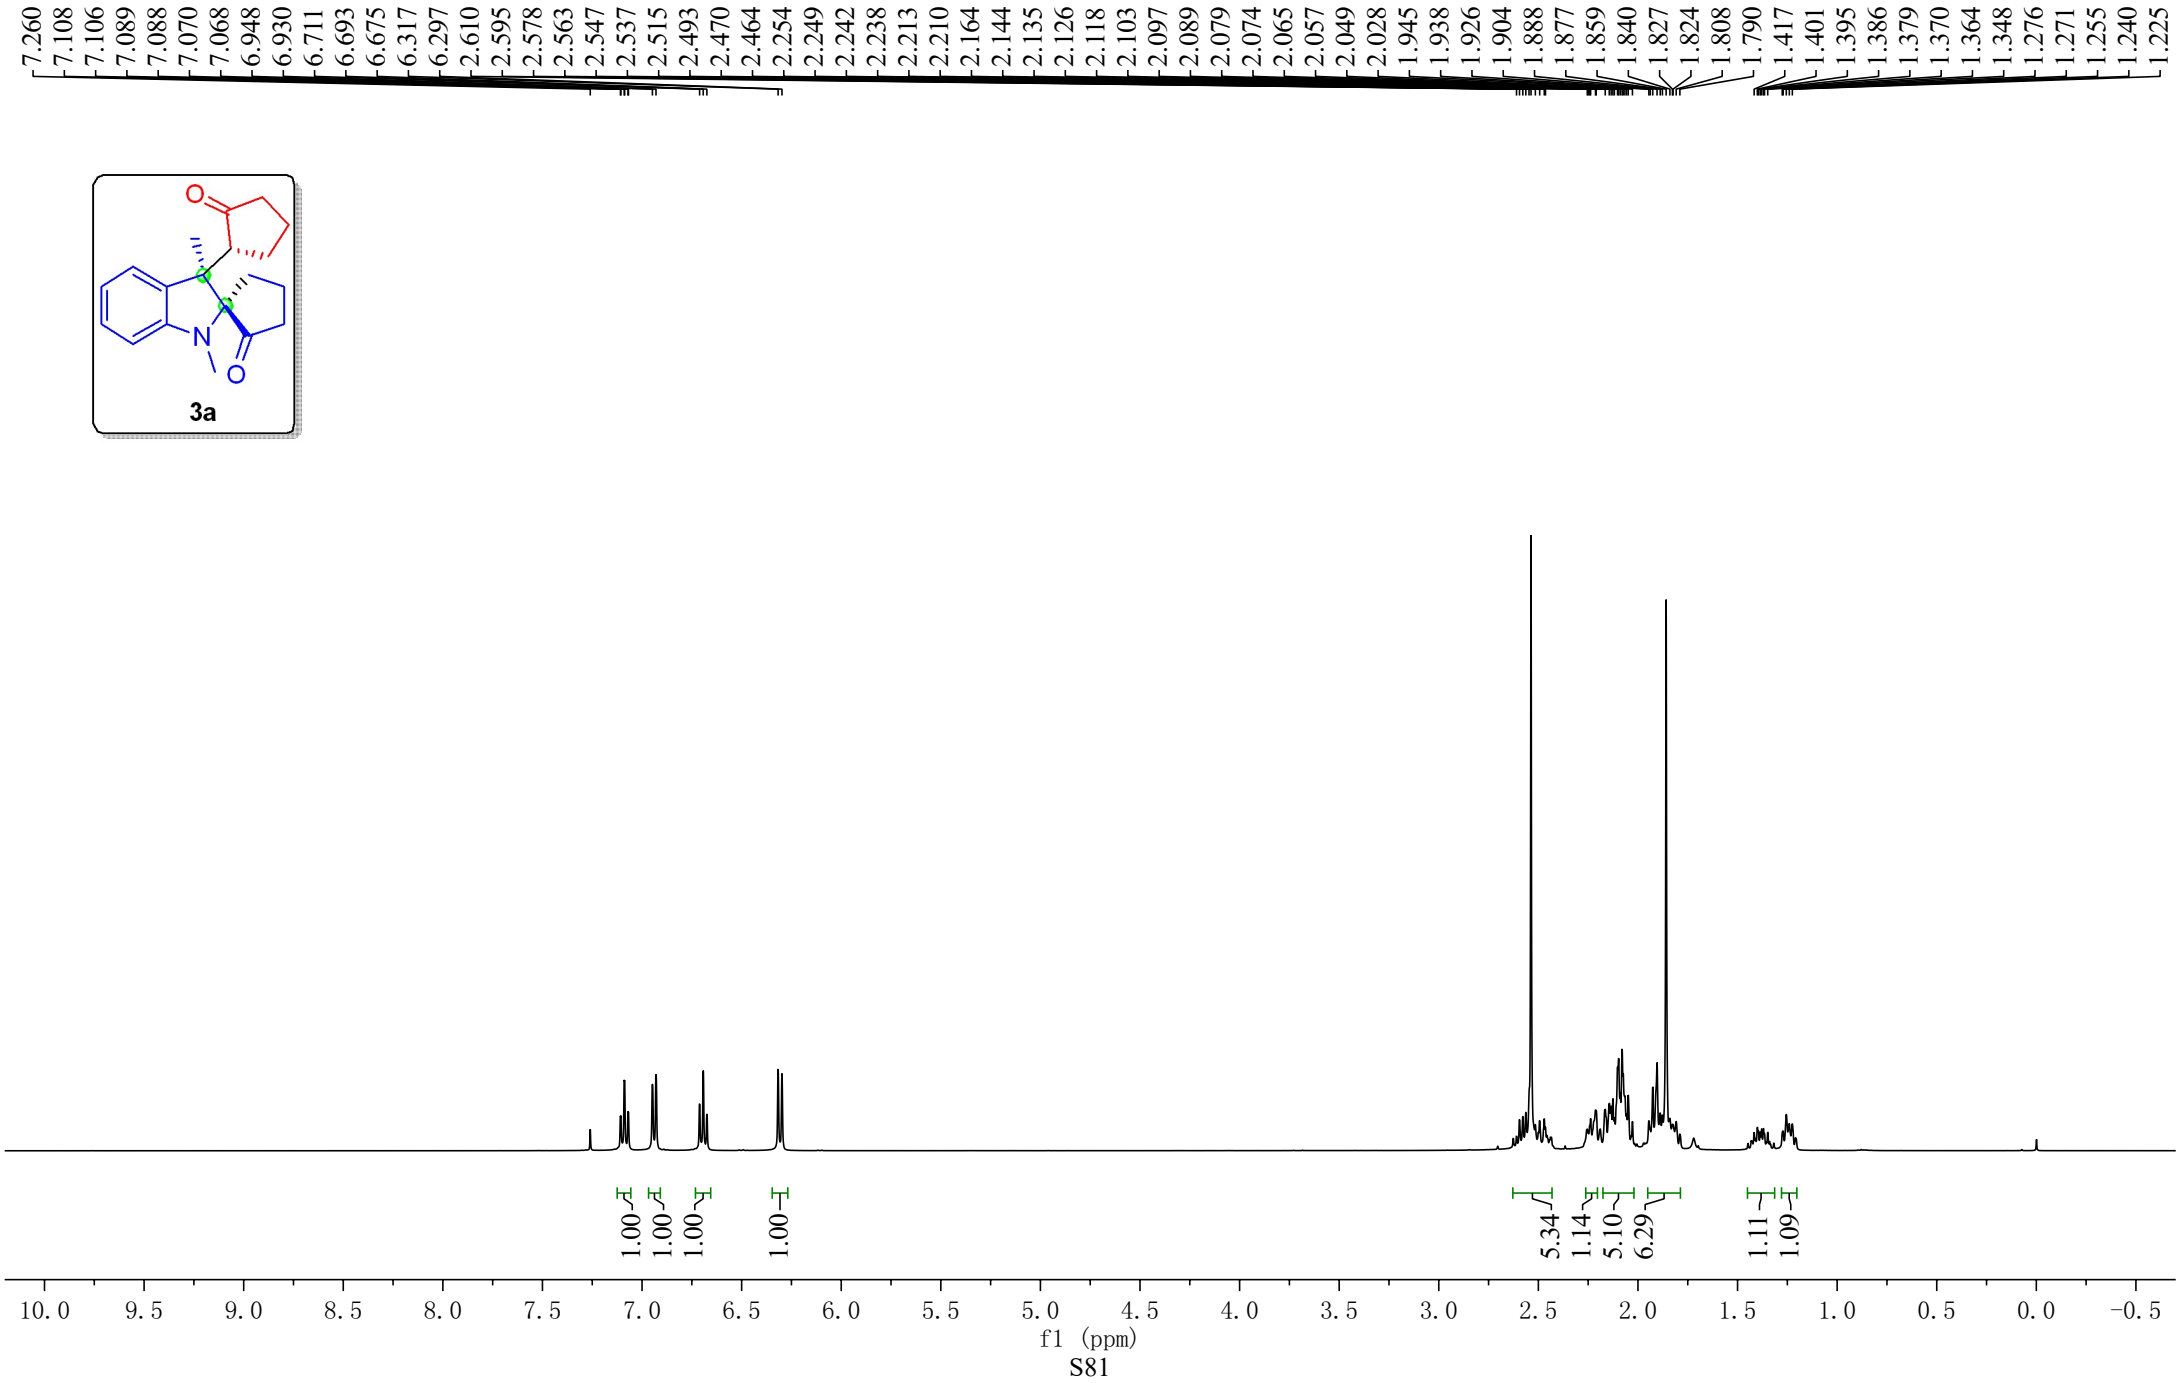

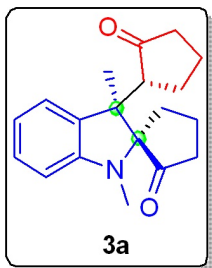

220.84  
219.43

150.21

134.33  
128.07  
121.52  
117.54

105.07

82.85

77.00 Chloroform-d

61.23

52.44

39.75  
37.65

29.30  
26.59  
26.14

19.86  
19.70  
17.16

240 230 220 210 200 190 180 170 160 150 140 130 120 110 100 90 80 70 60 50 40 30 20 10 0

f1 (ppm)  
S82

7.160 Benzene-d6

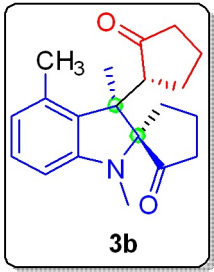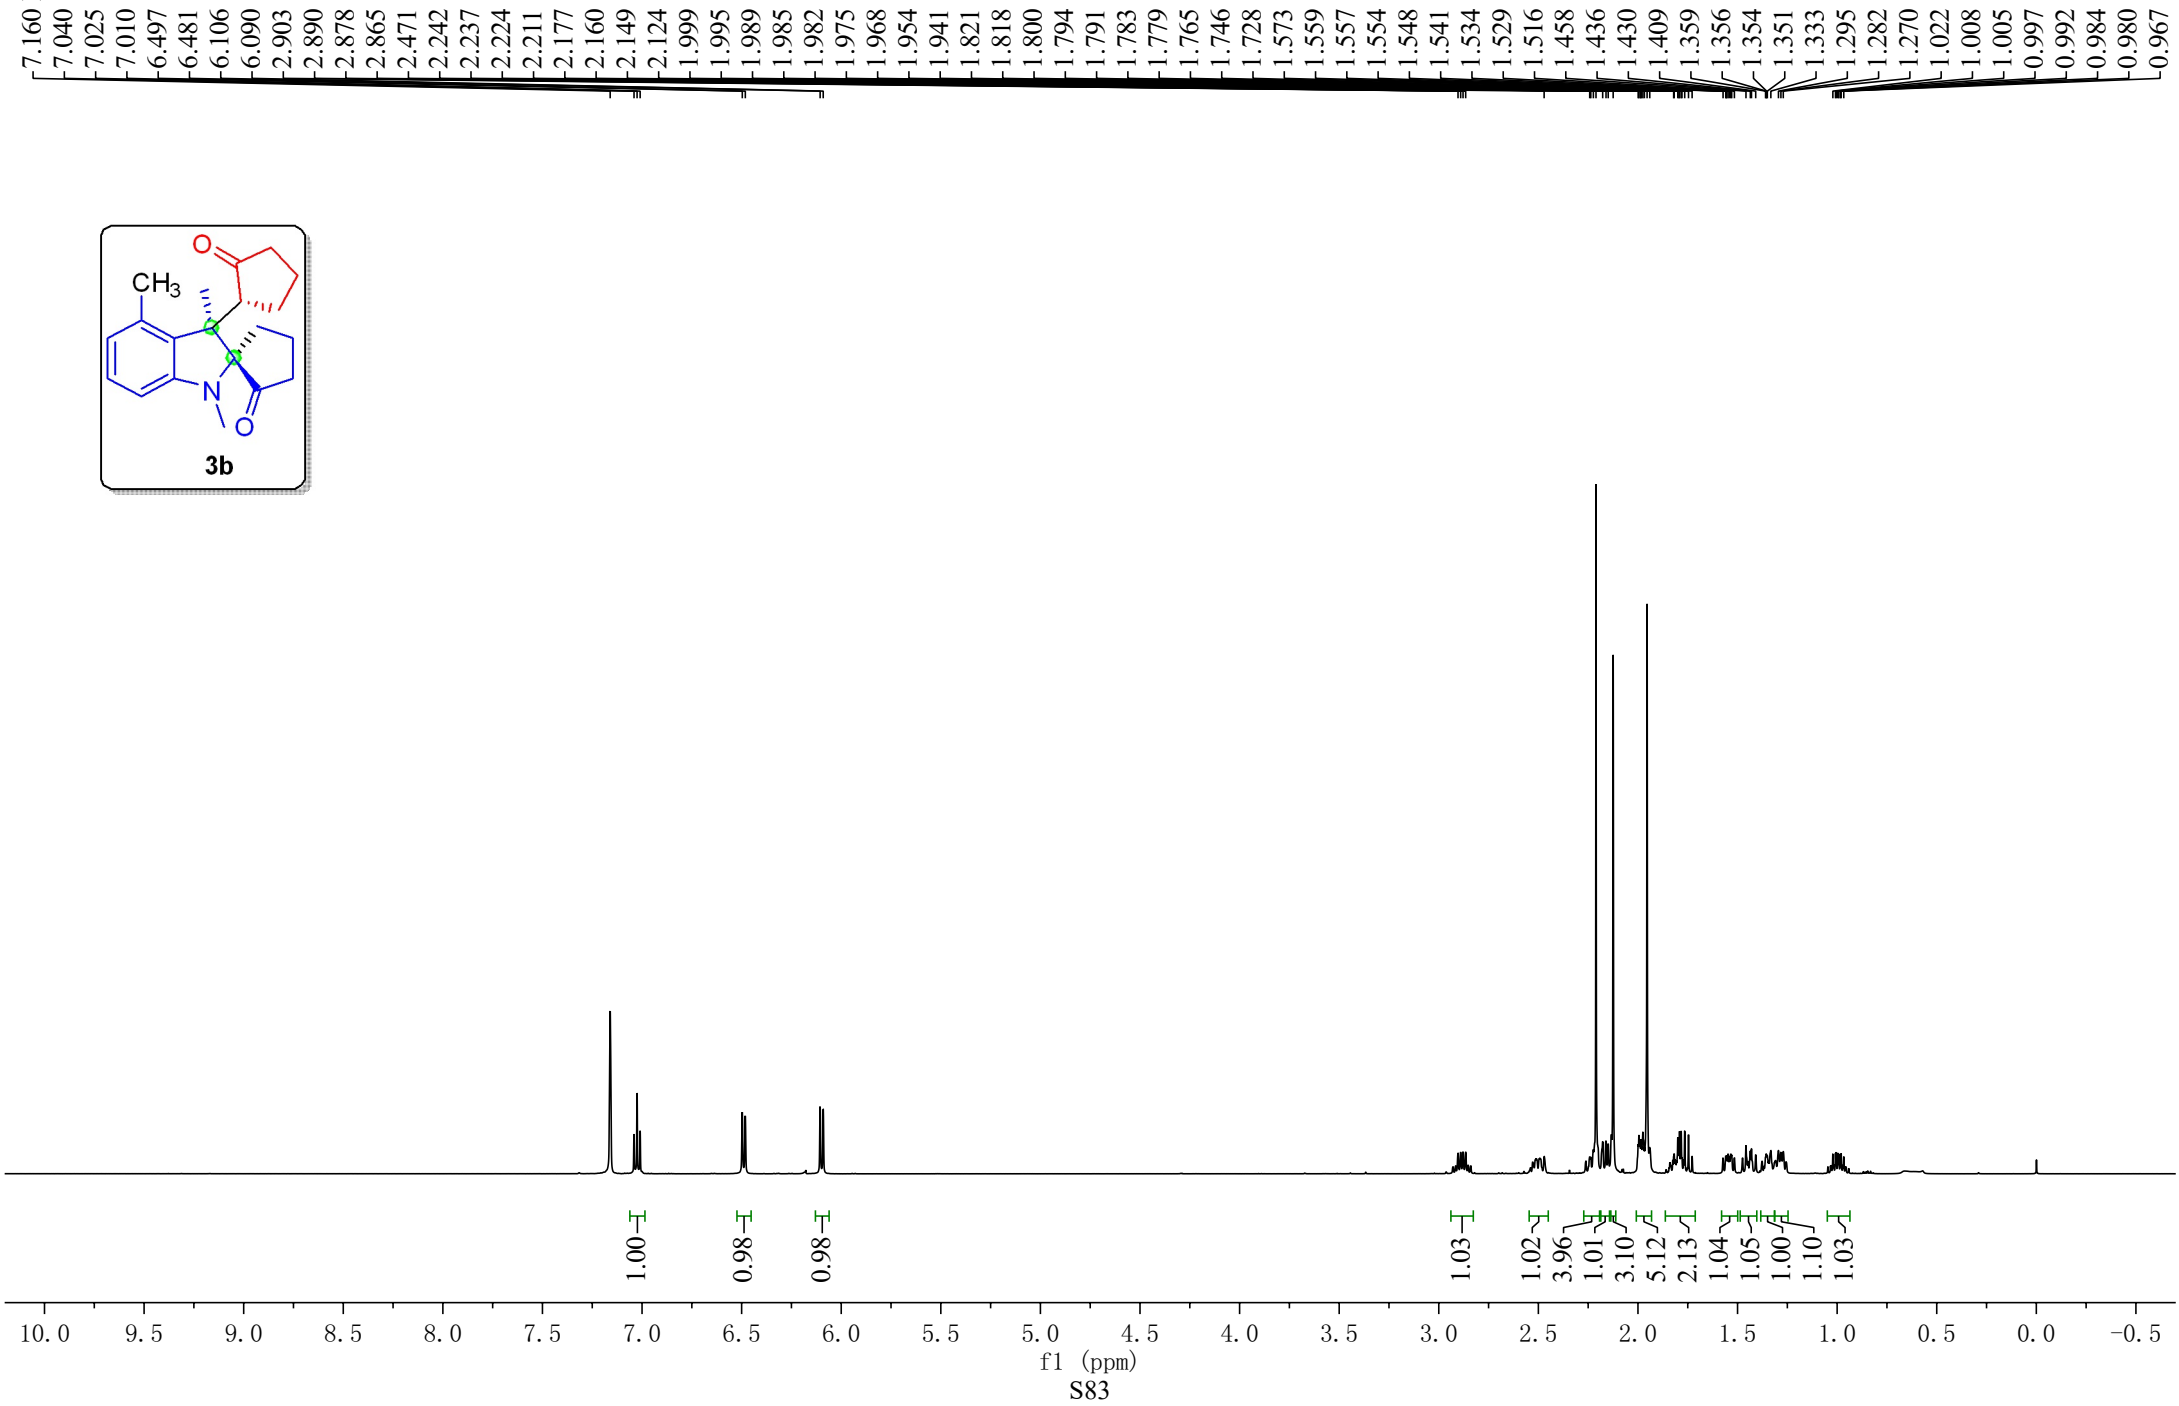

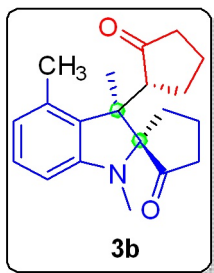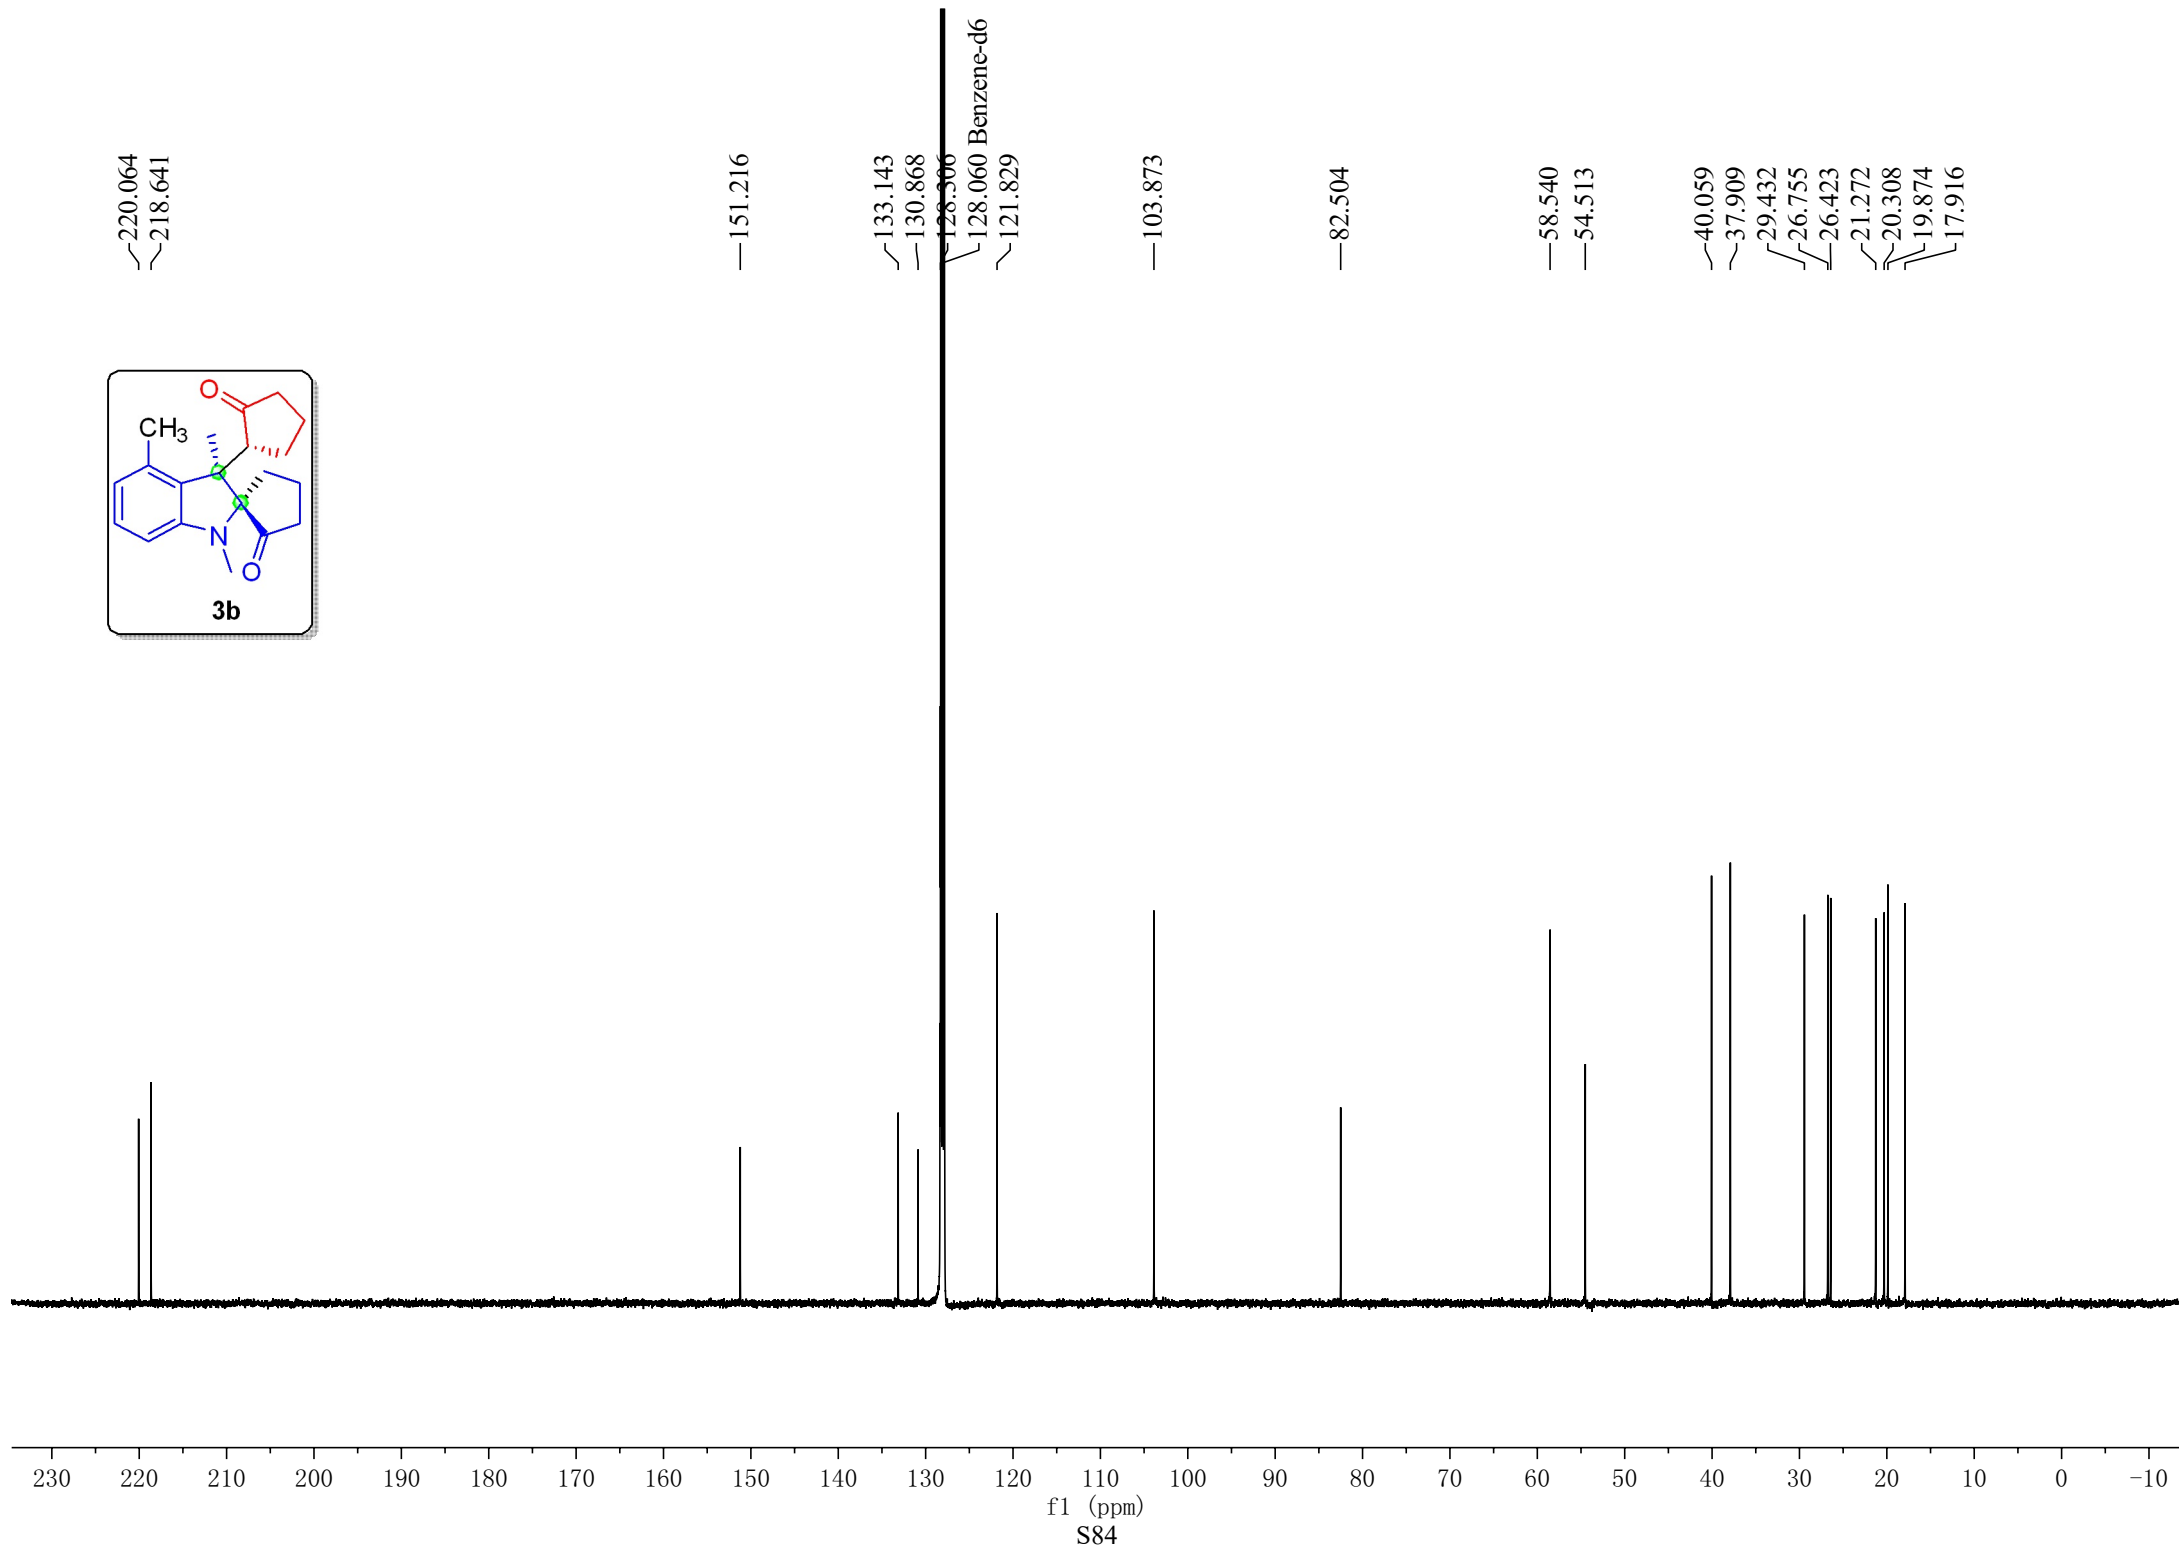



7.260 Chloroform-d

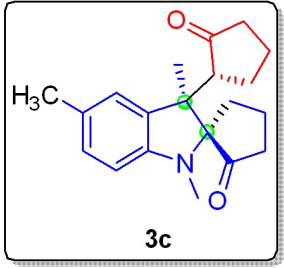

3c

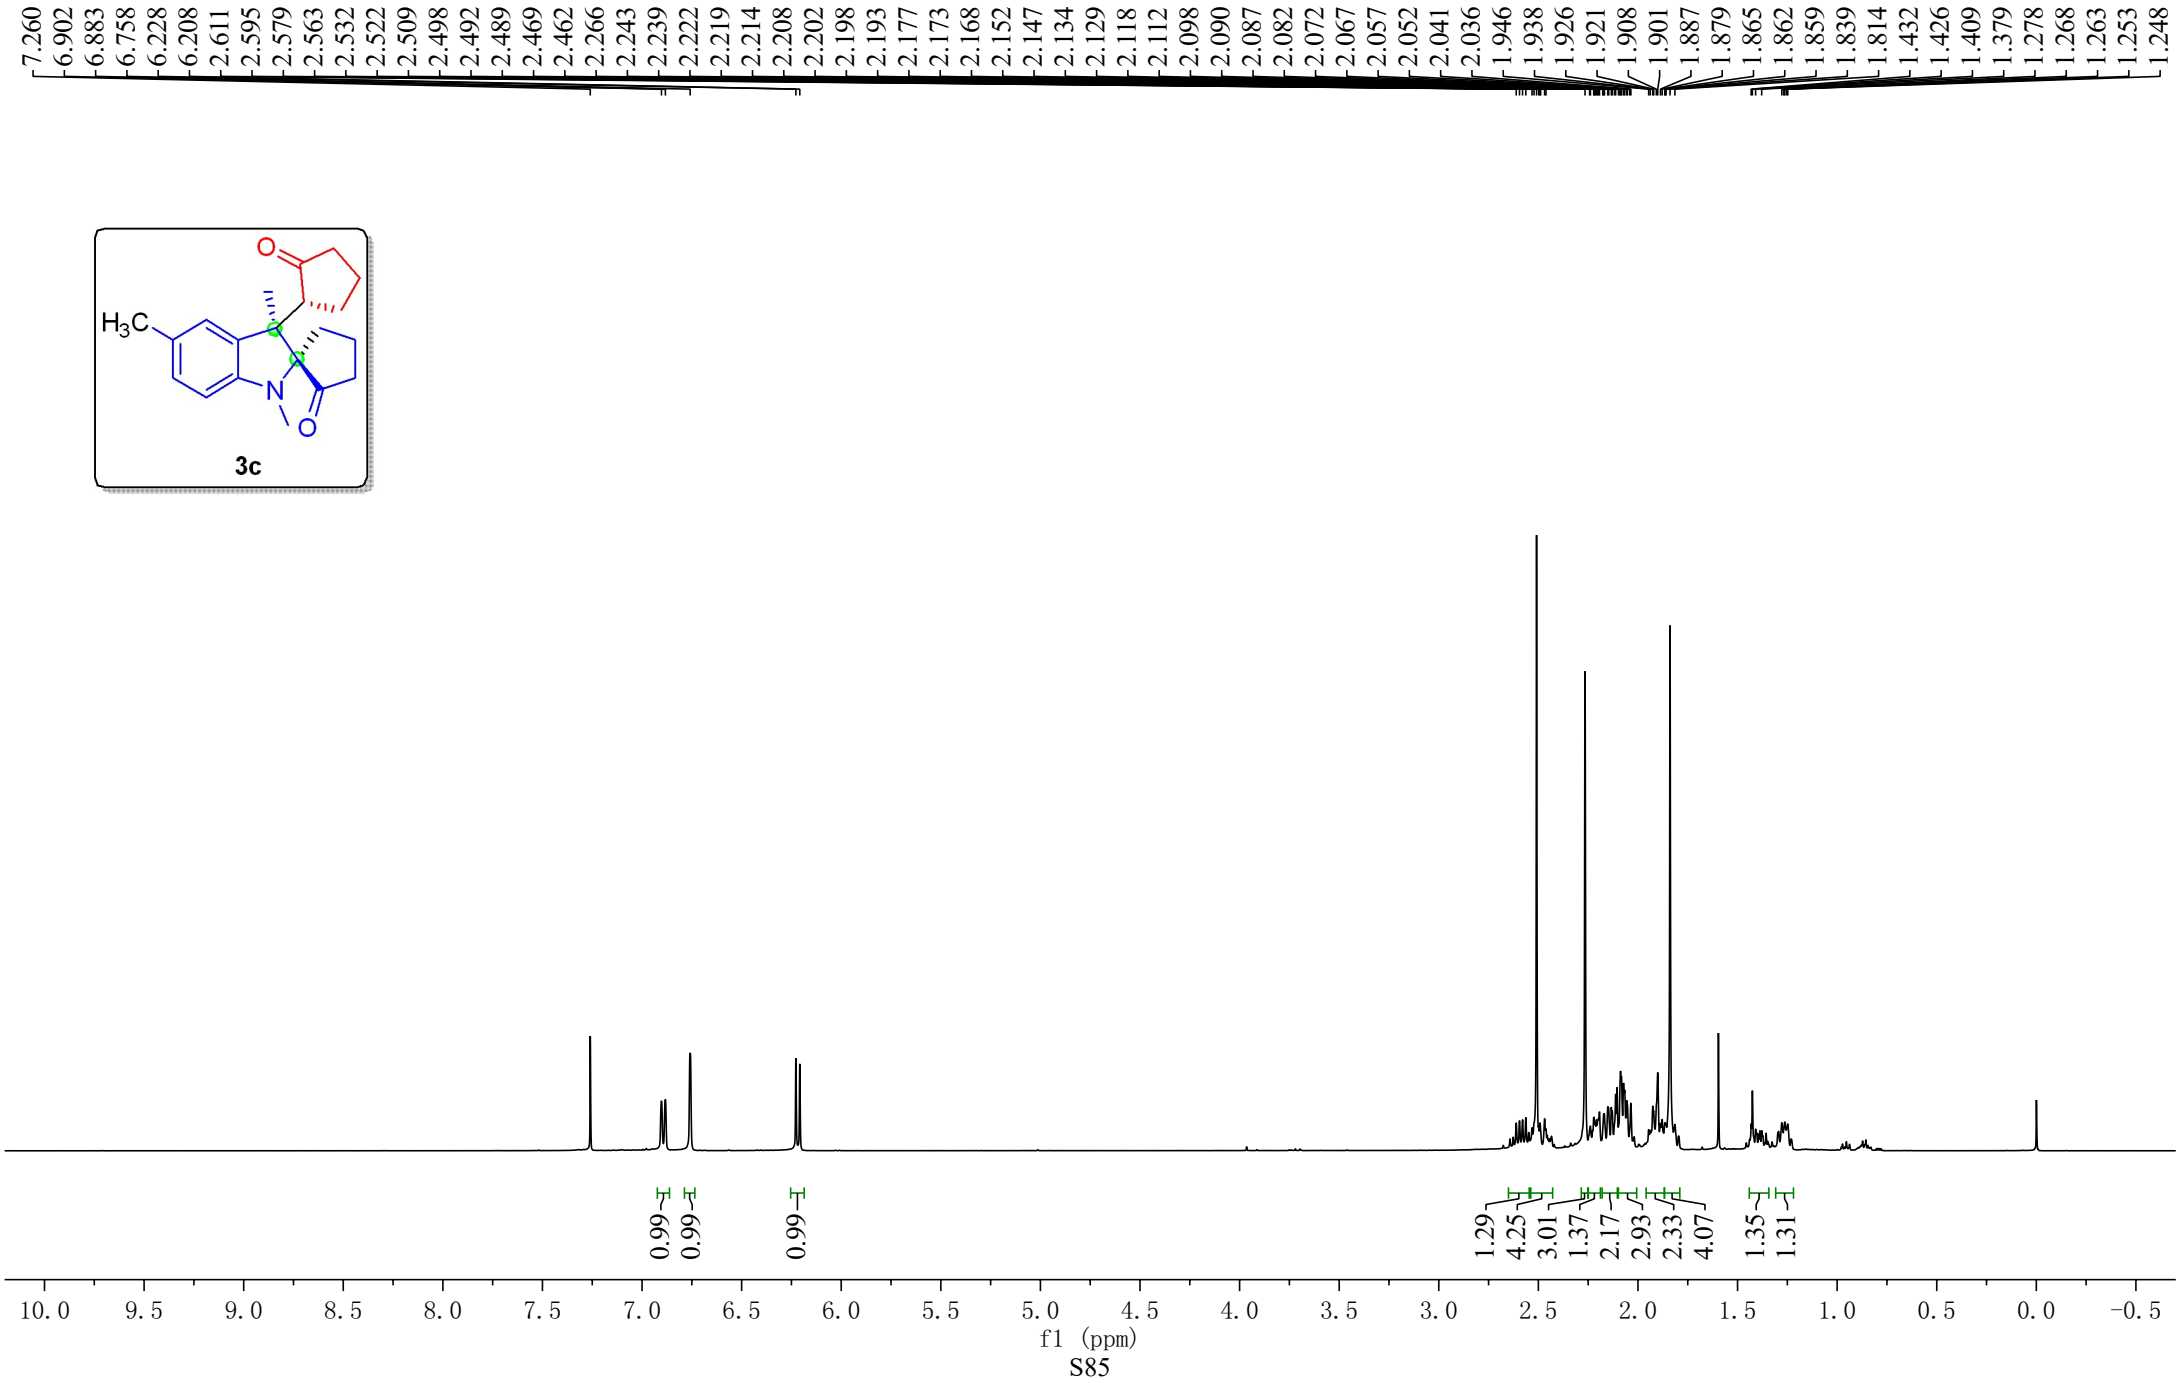

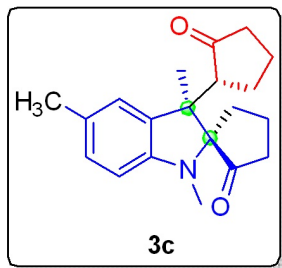

221.02  
219.60

148.23

134.61  
128.25  
126.88  
122.49

105.03

83.05

77.00 Chloroform-d

61.22

52.47

39.83  
37.68  
29.62  
26.24  
20.88  
19.93  
19.75  
17.19

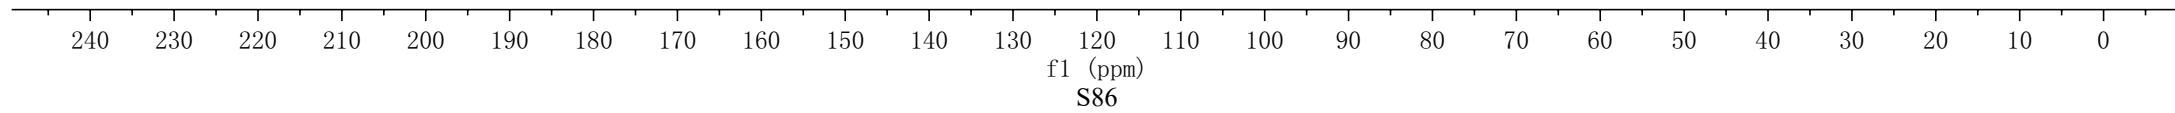

7.260 Chloroform-d

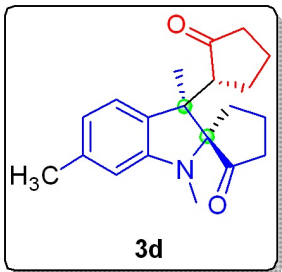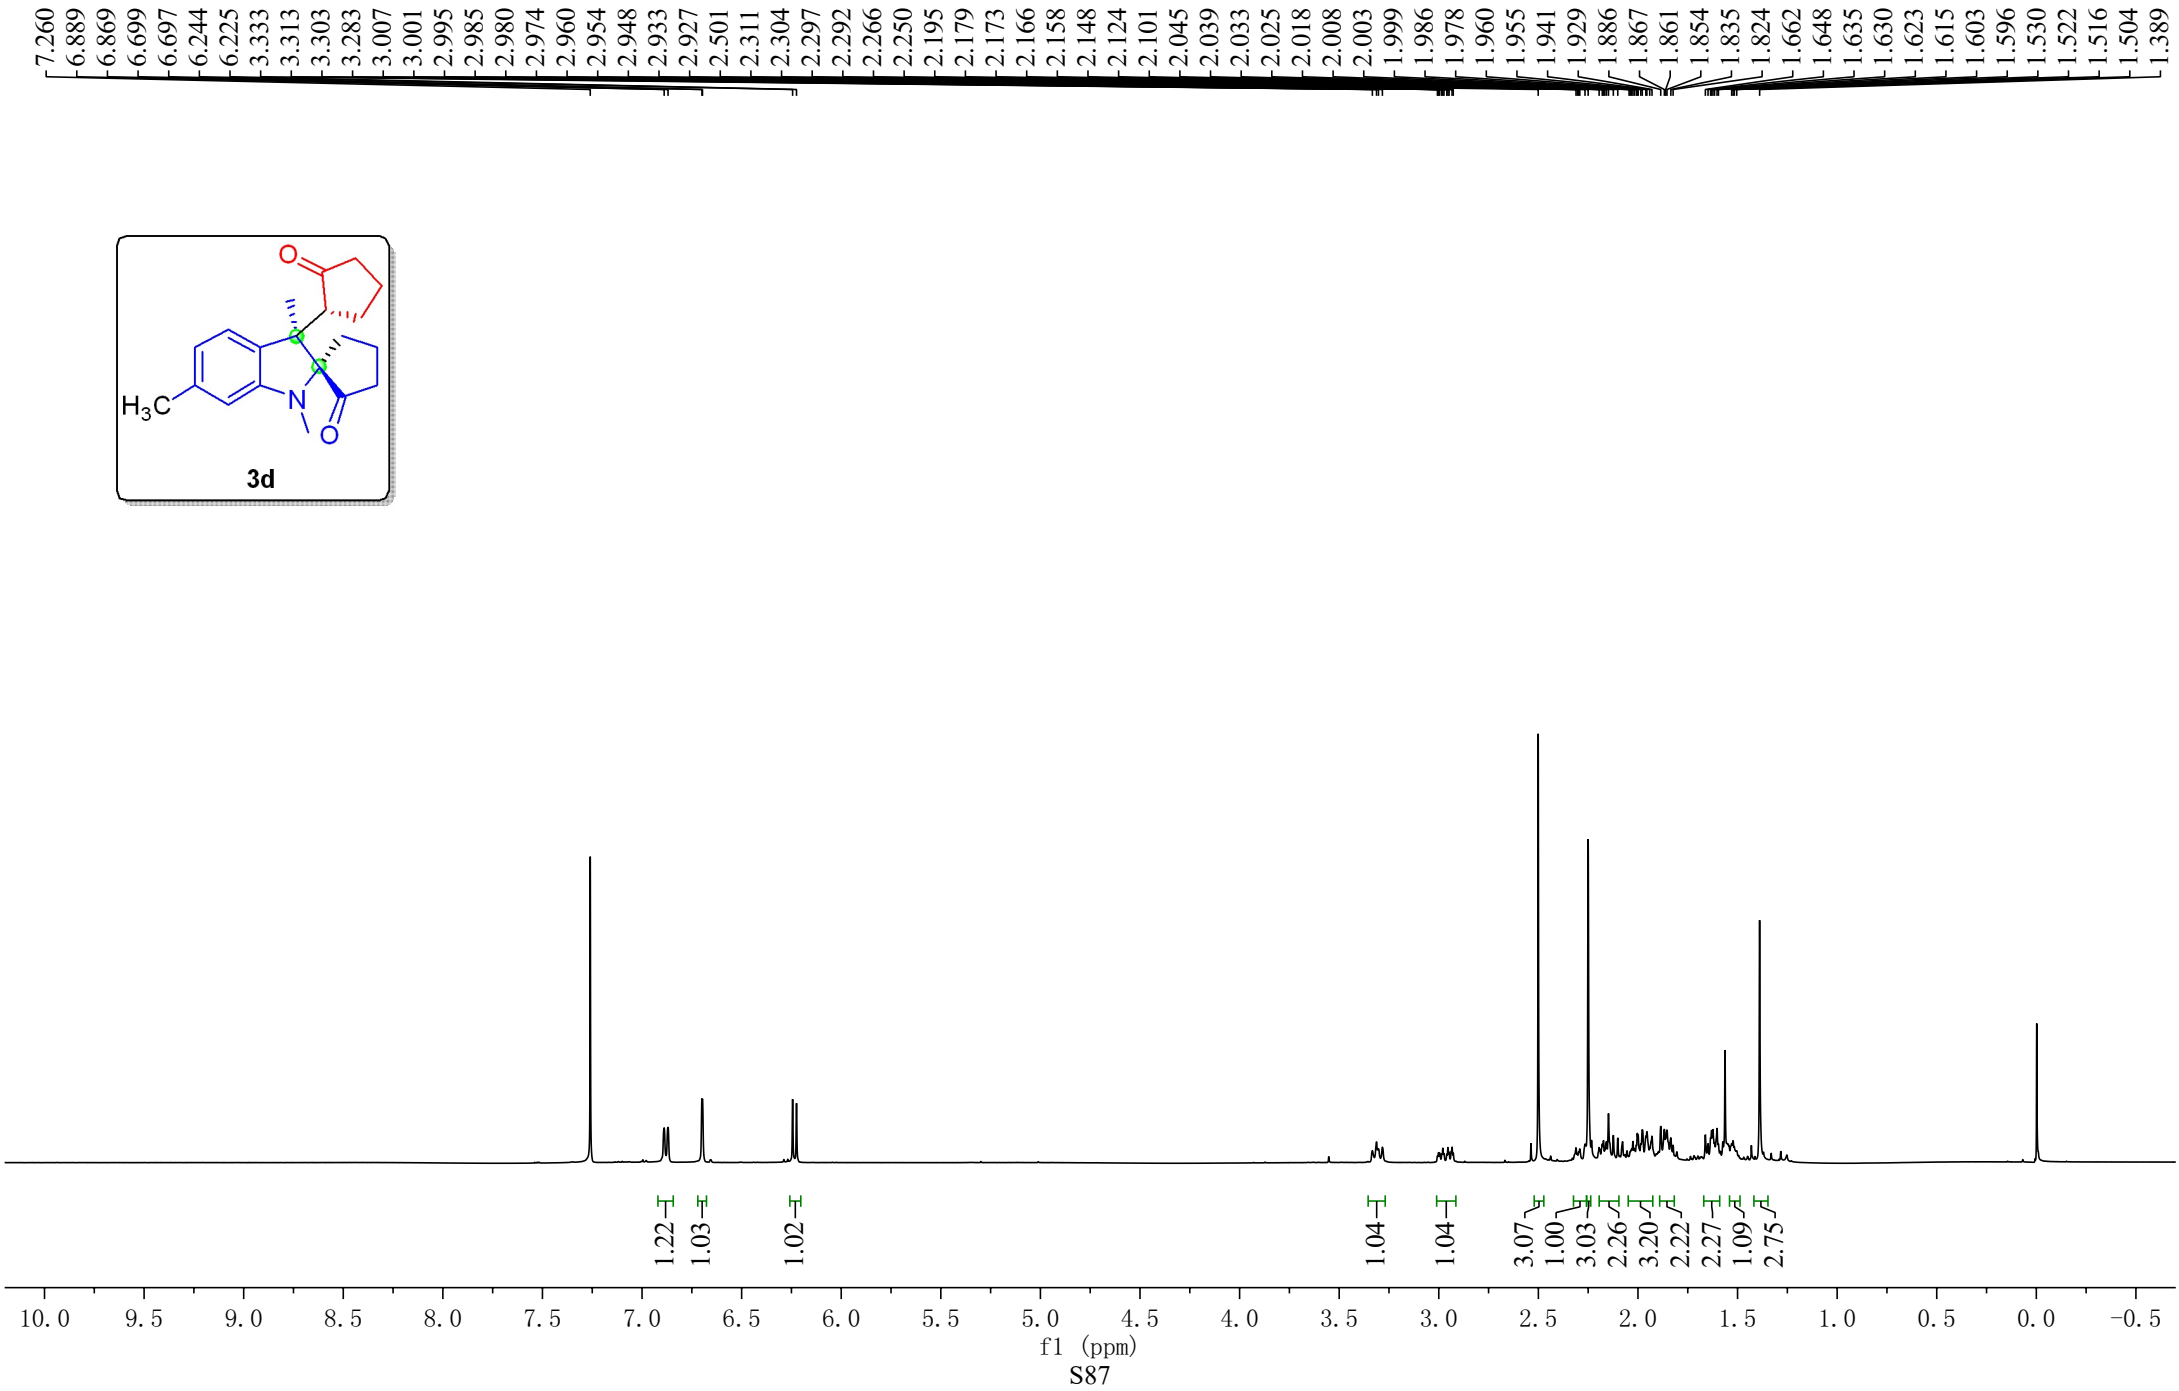

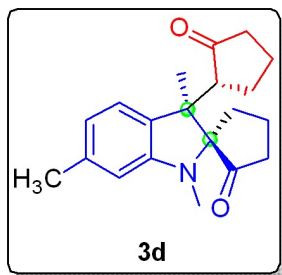

219.95  
218.59

148.19

133.47  
128.19  
126.50  
124.14

105.62

84.36

77.00 Chloroform-d

51.12  
49.91

39.47  
37.53  
30.17  
28.00  
24.29  
20.92  
19.54  
17.51  
13.88

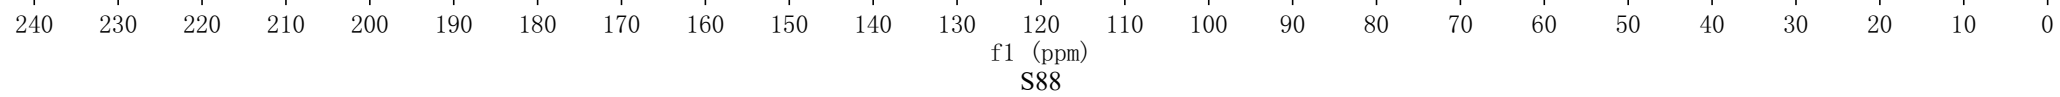

7.260 Chloroform-d

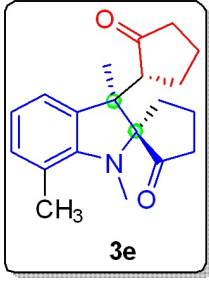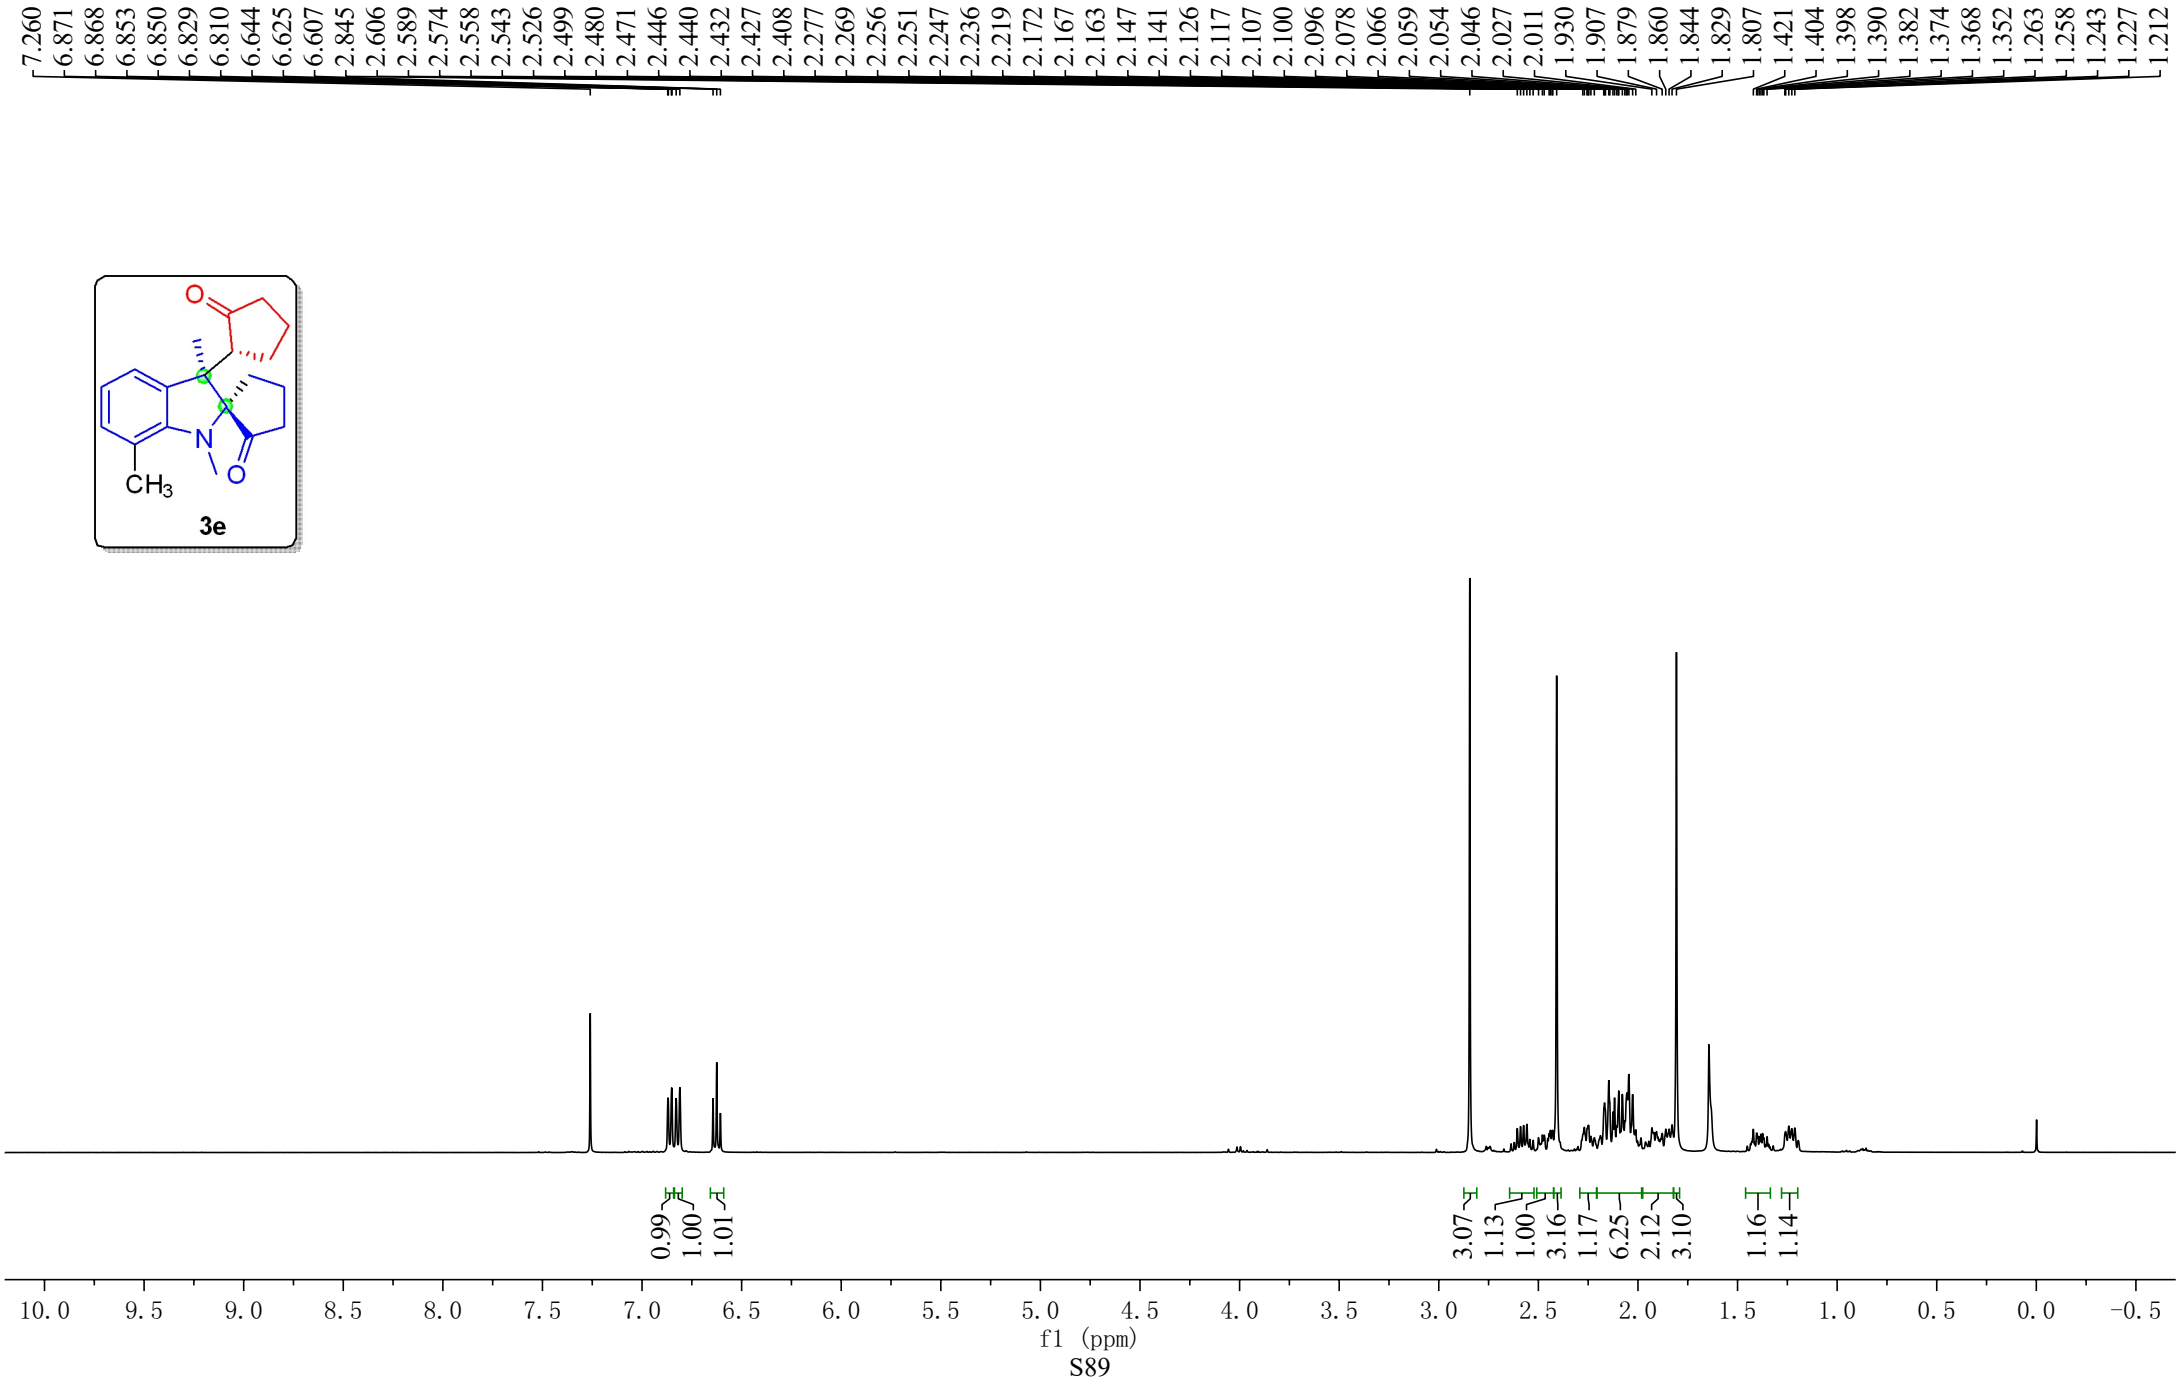

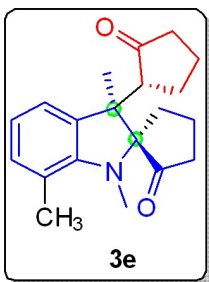

220.76  
219.41

147.95

135.50  
131.76

119.95  
118.30  
117.65

82.90

77.00 Chloroform-d

61.26

51.65

39.76  
37.63  
33.51

26.48  
20.05  
19.95  
19.74  
17.26

240 230 220 210 200 190 180 170 160 150 140 130 120 110 100 90 80 70 60 50 40 30 20 10 0

f1 (ppm)  
S90

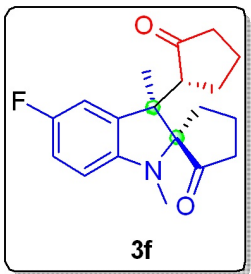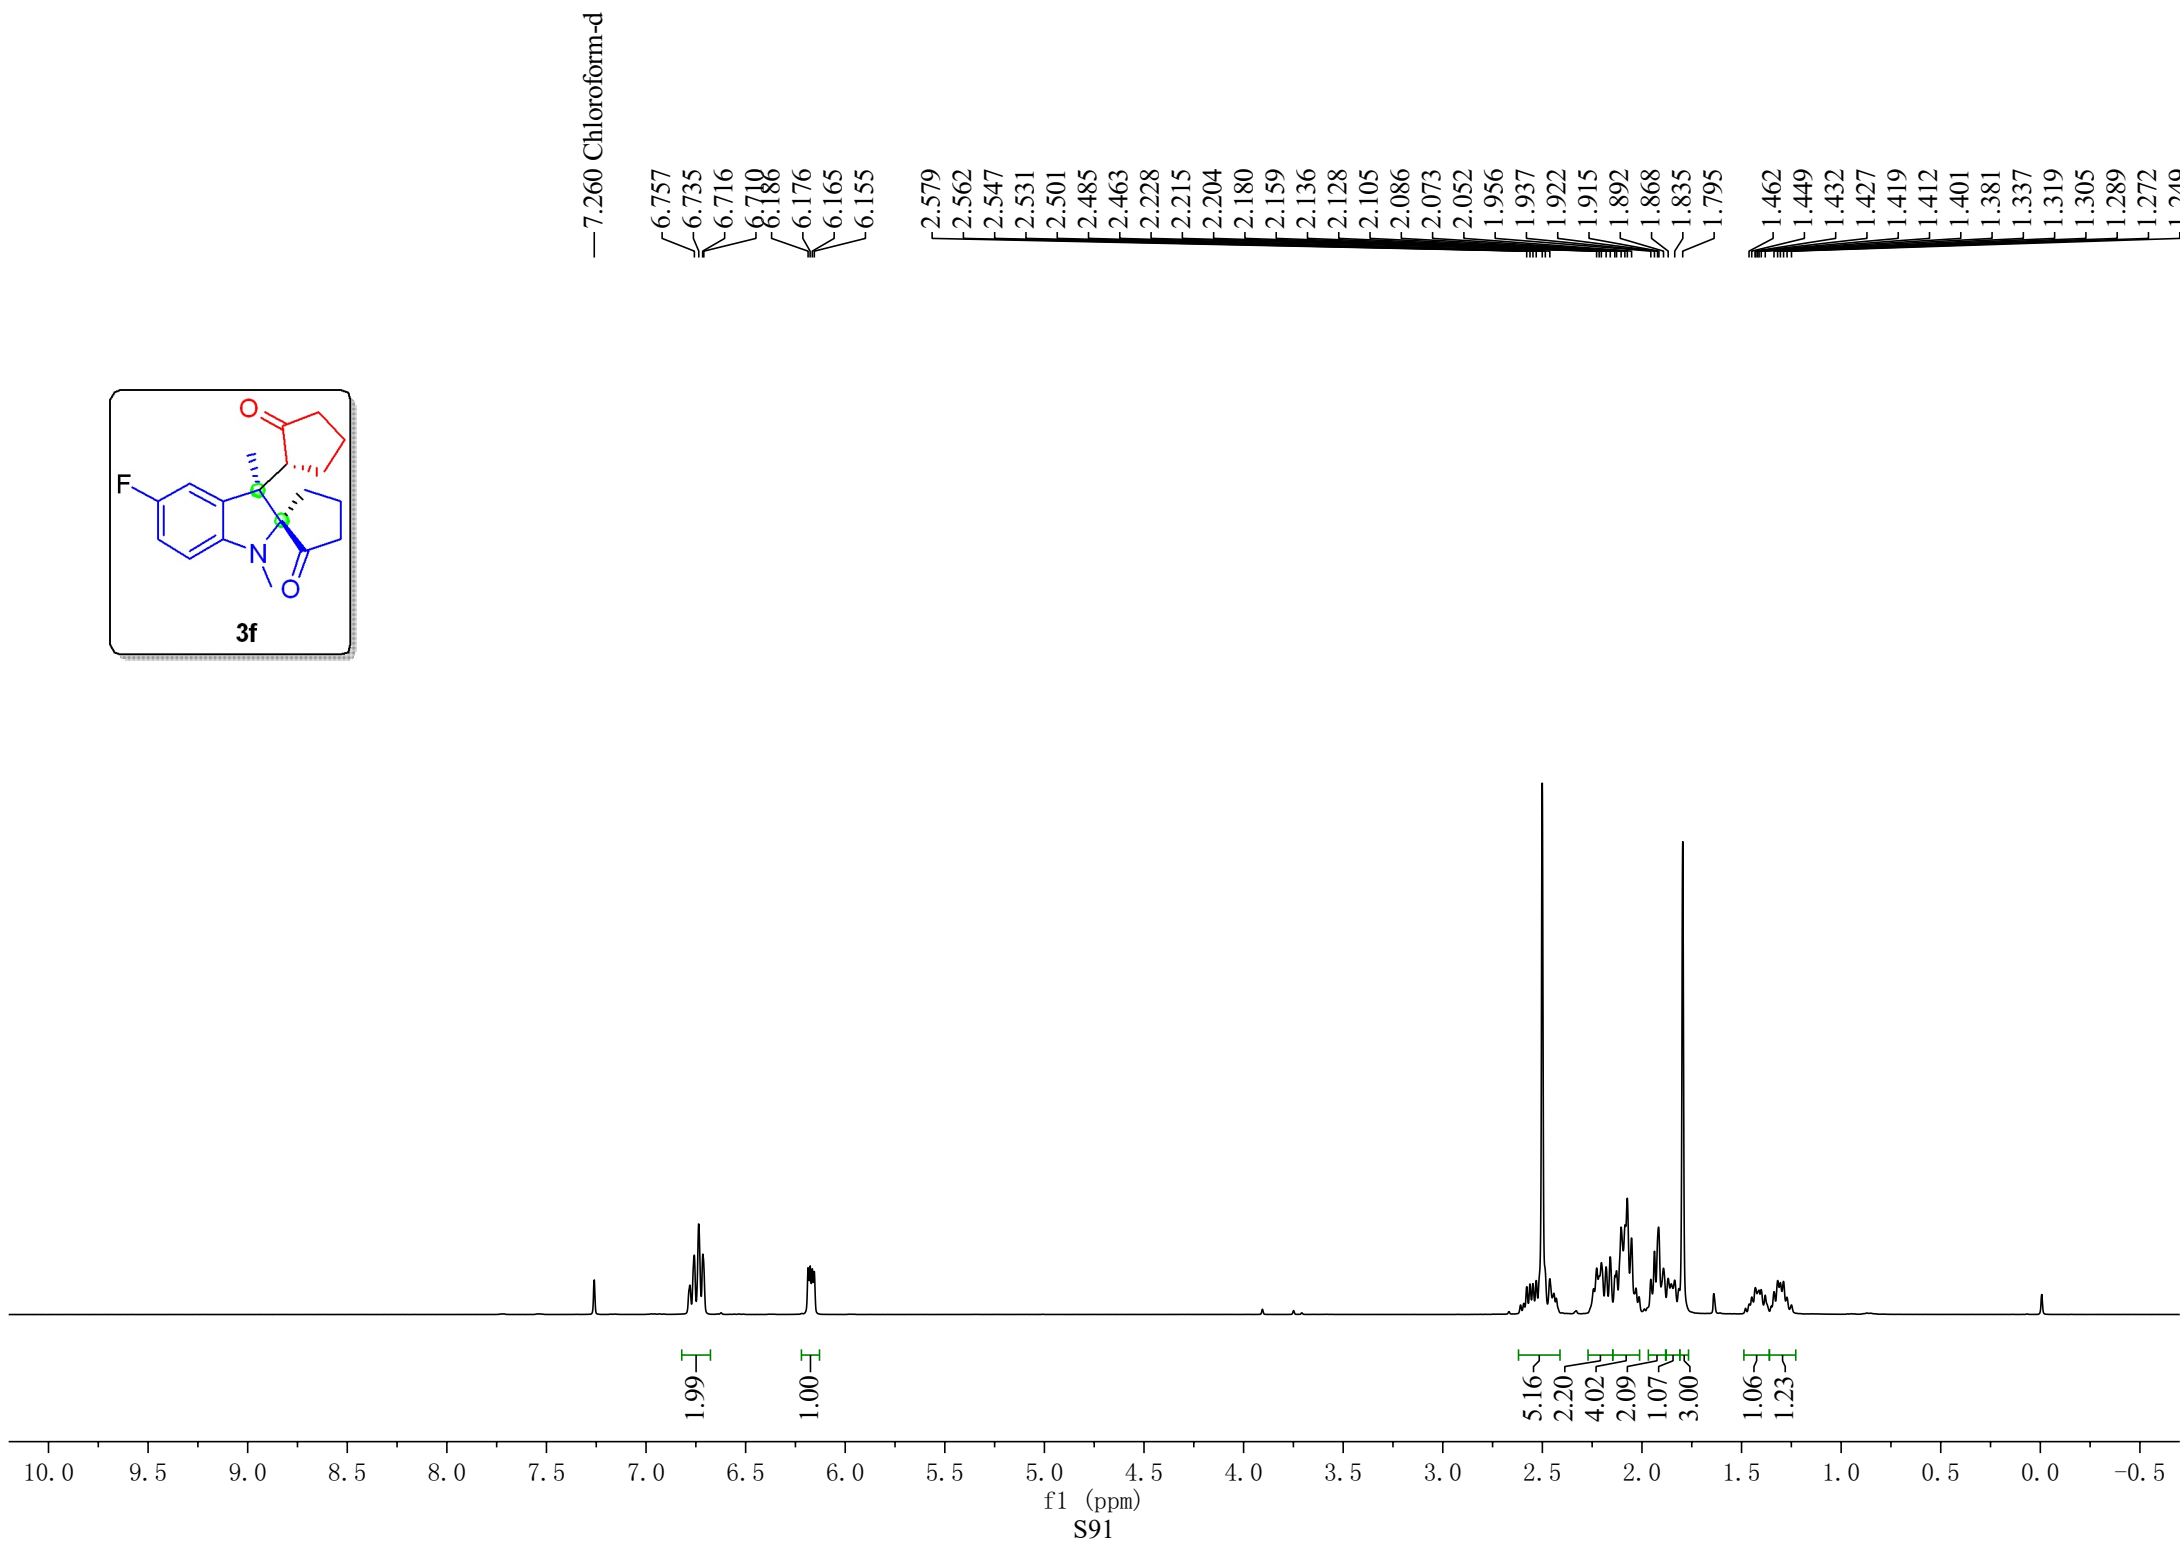



220.31  
219.05

157.86  
155.53

146.41

136.12  
136.05

113.72  
113.49  
109.88  
109.64  
105.07  
104.99

83.10

77.00 Chloroform-d

60.65

52.18

39.68  
37.61

29.80  
26.41  
26.20

19.92  
19.60  
17.15

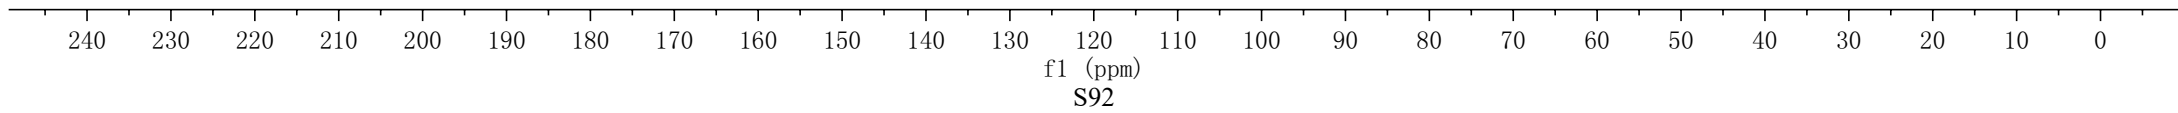



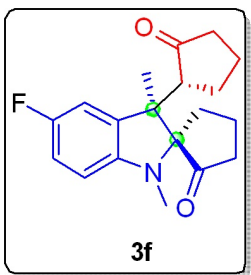

--127.26

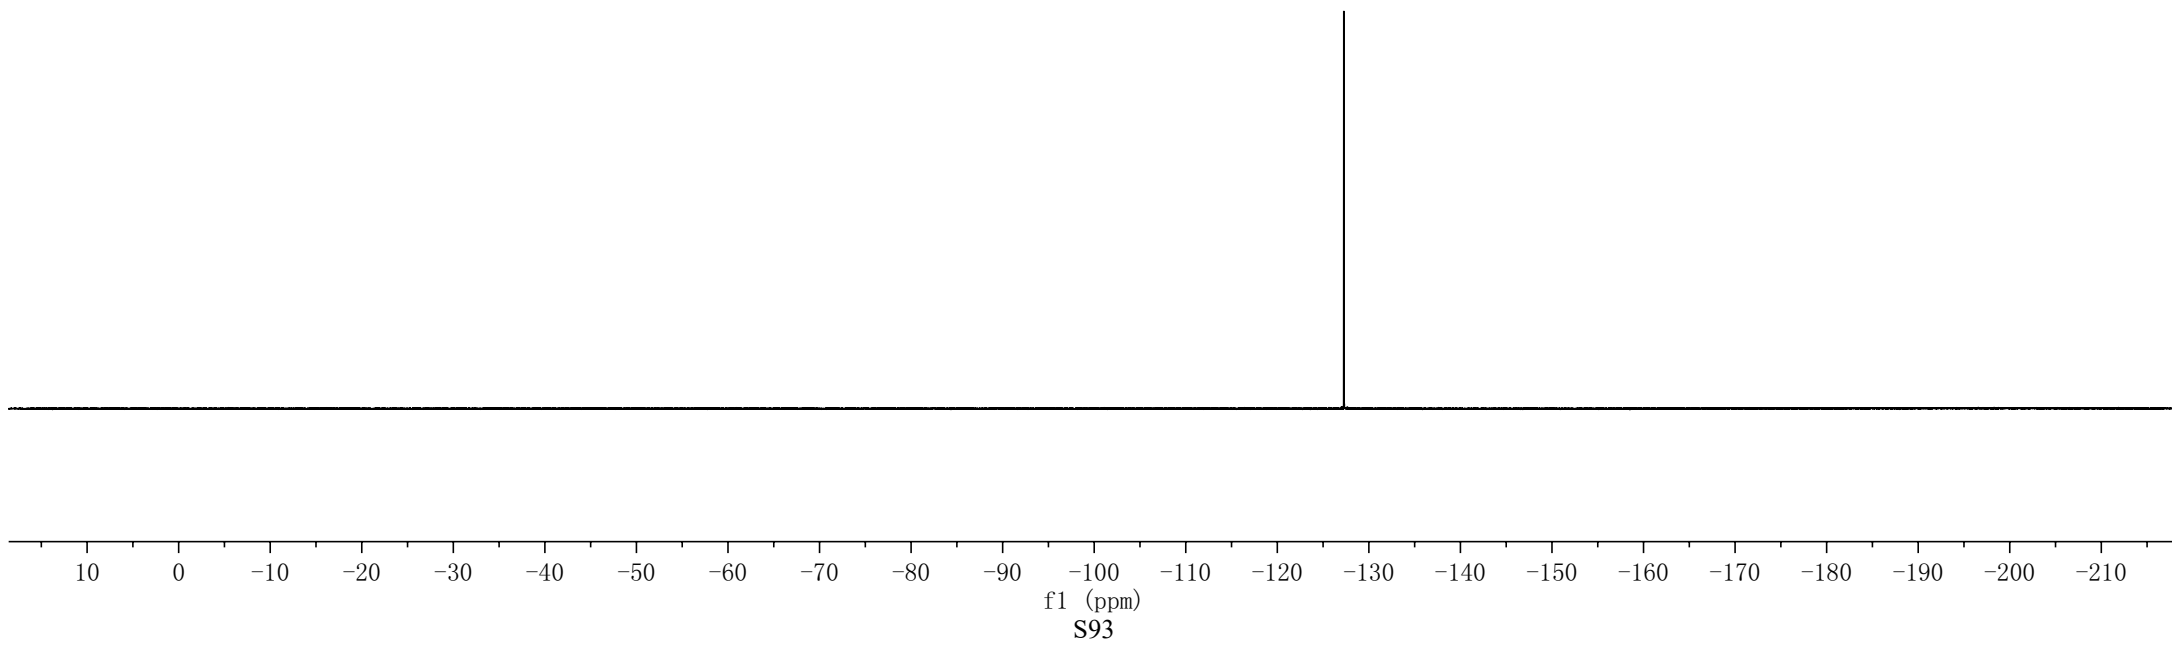

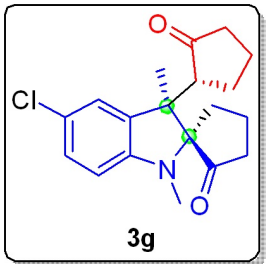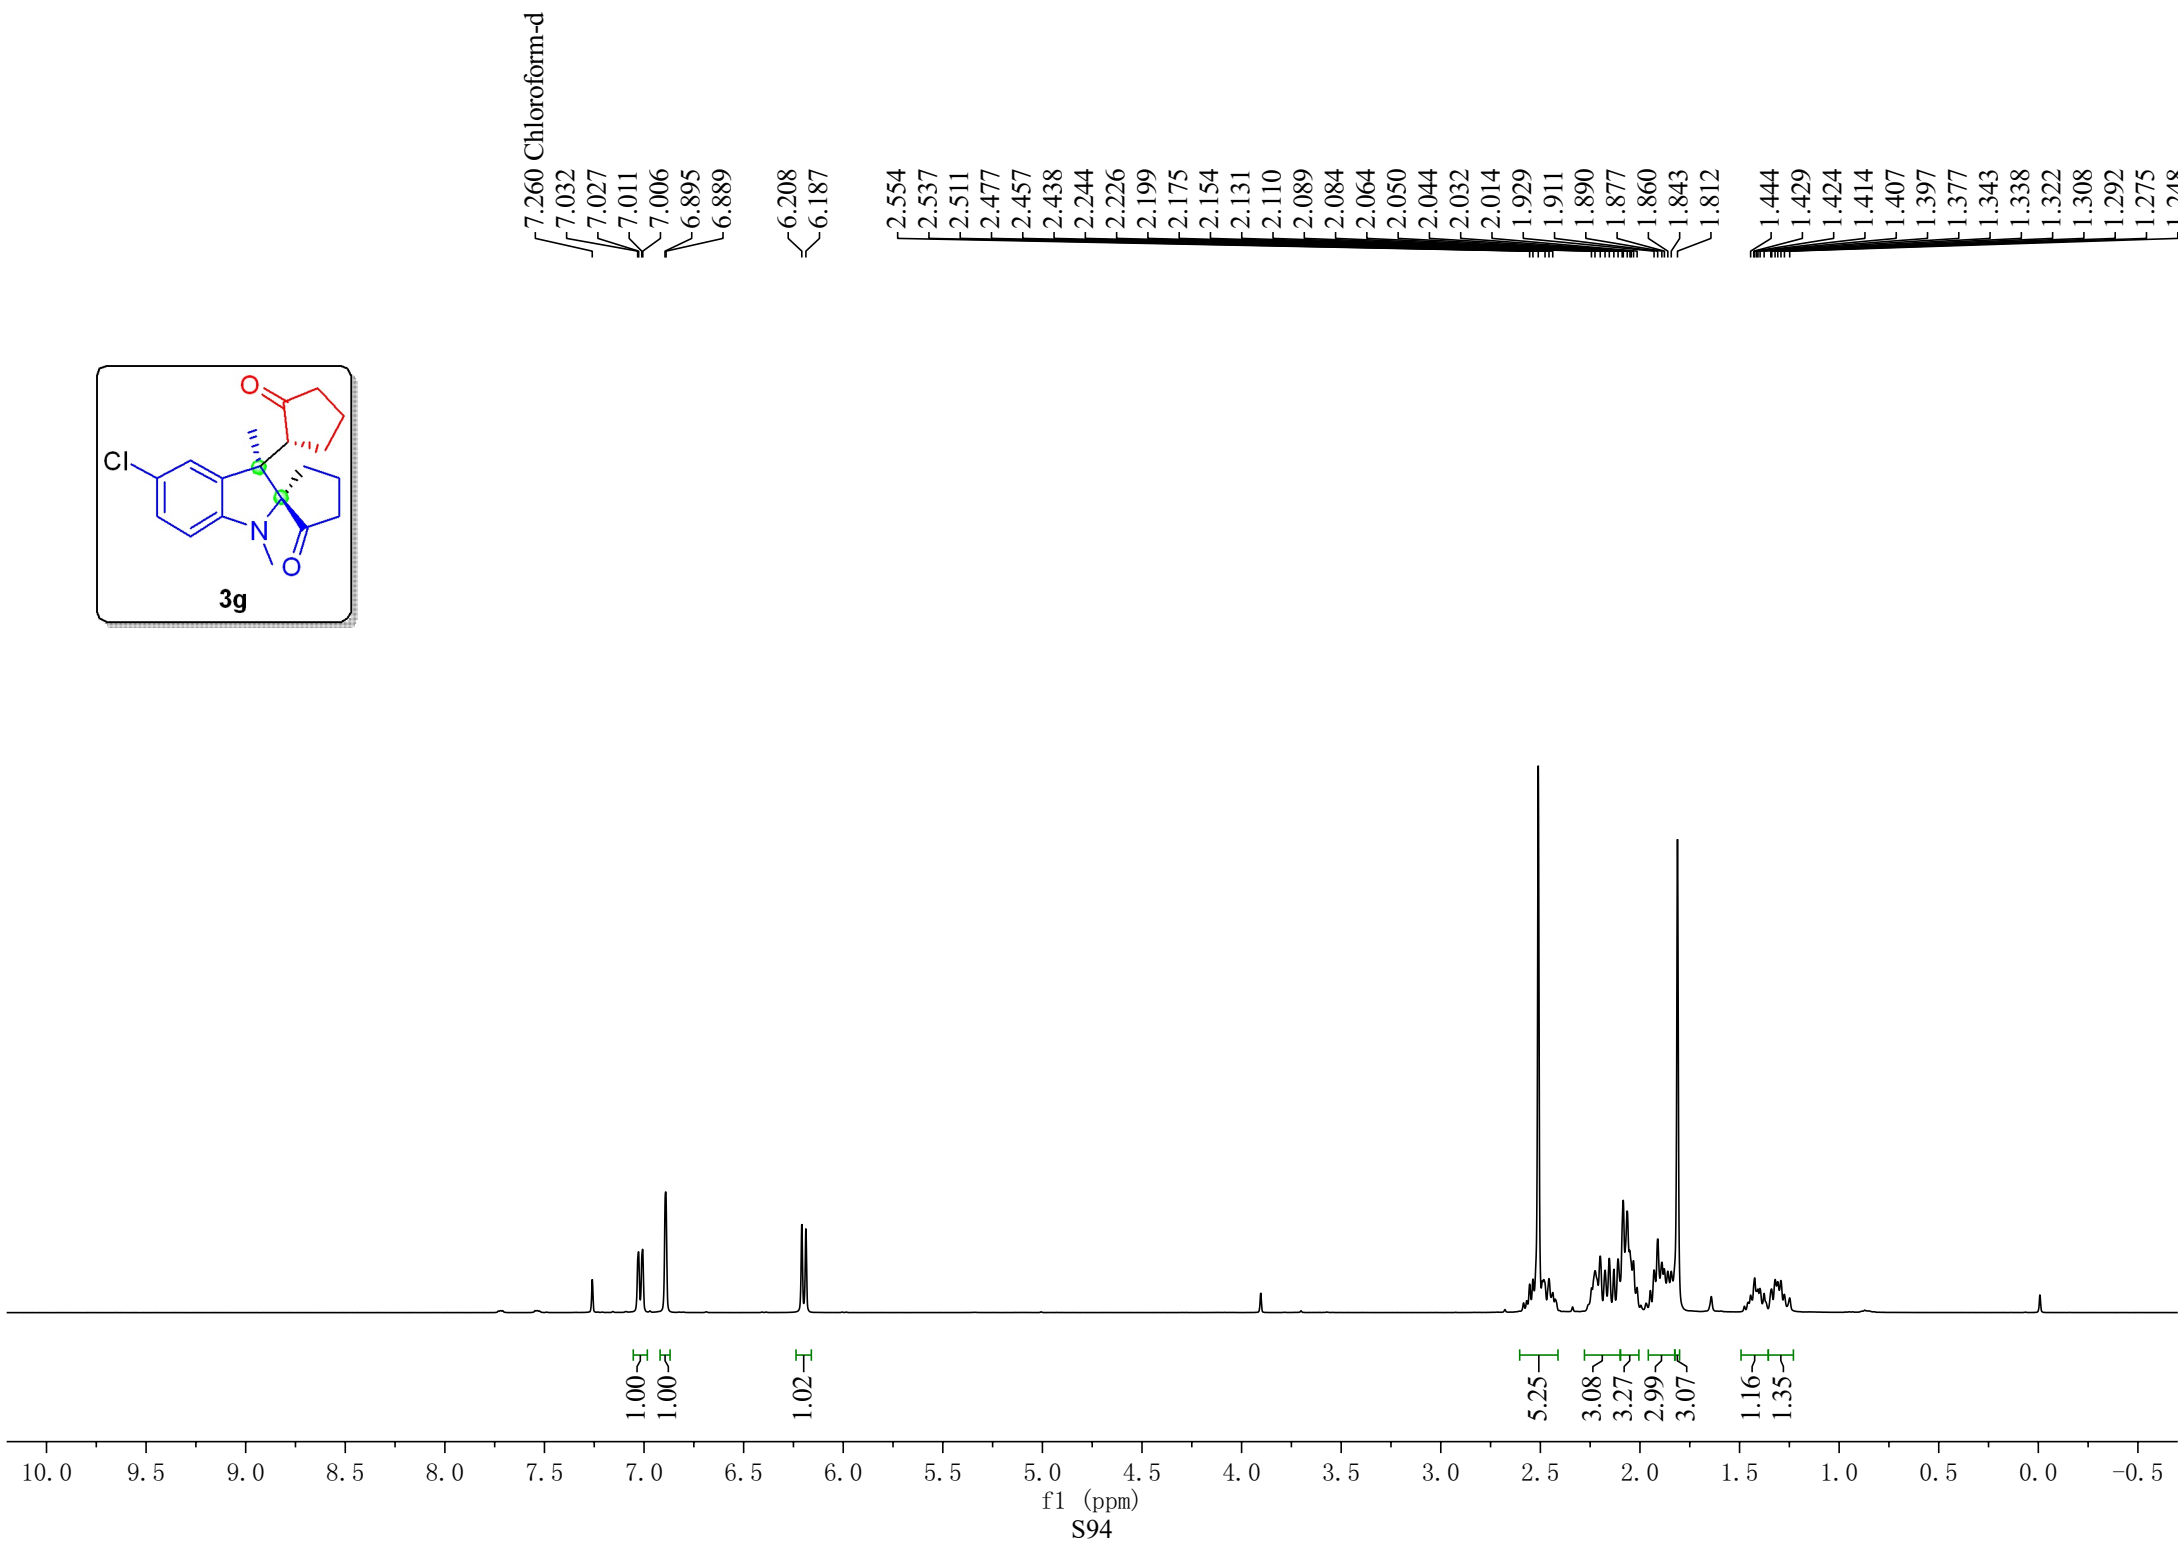

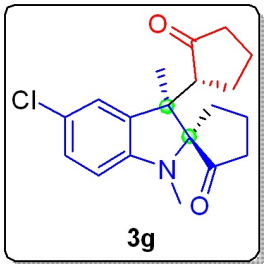

220.11  
219.03

148.84

136.32

127.76

122.10

105.86

82.99

77.00 Chloroform-d

60.84

52.31

39.65

37.59

29.40

26.71

26.09

19.86

19.60

17.17

240

230

220

210

200

190

180

170

160

150

140

130

120

110

100

90

80

70

60

50

40

30

20

10

0

f1 (ppm)  
S95

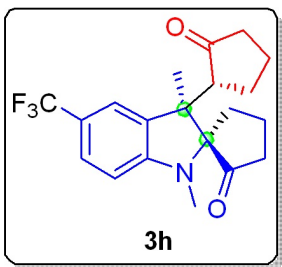

Chloroform-d

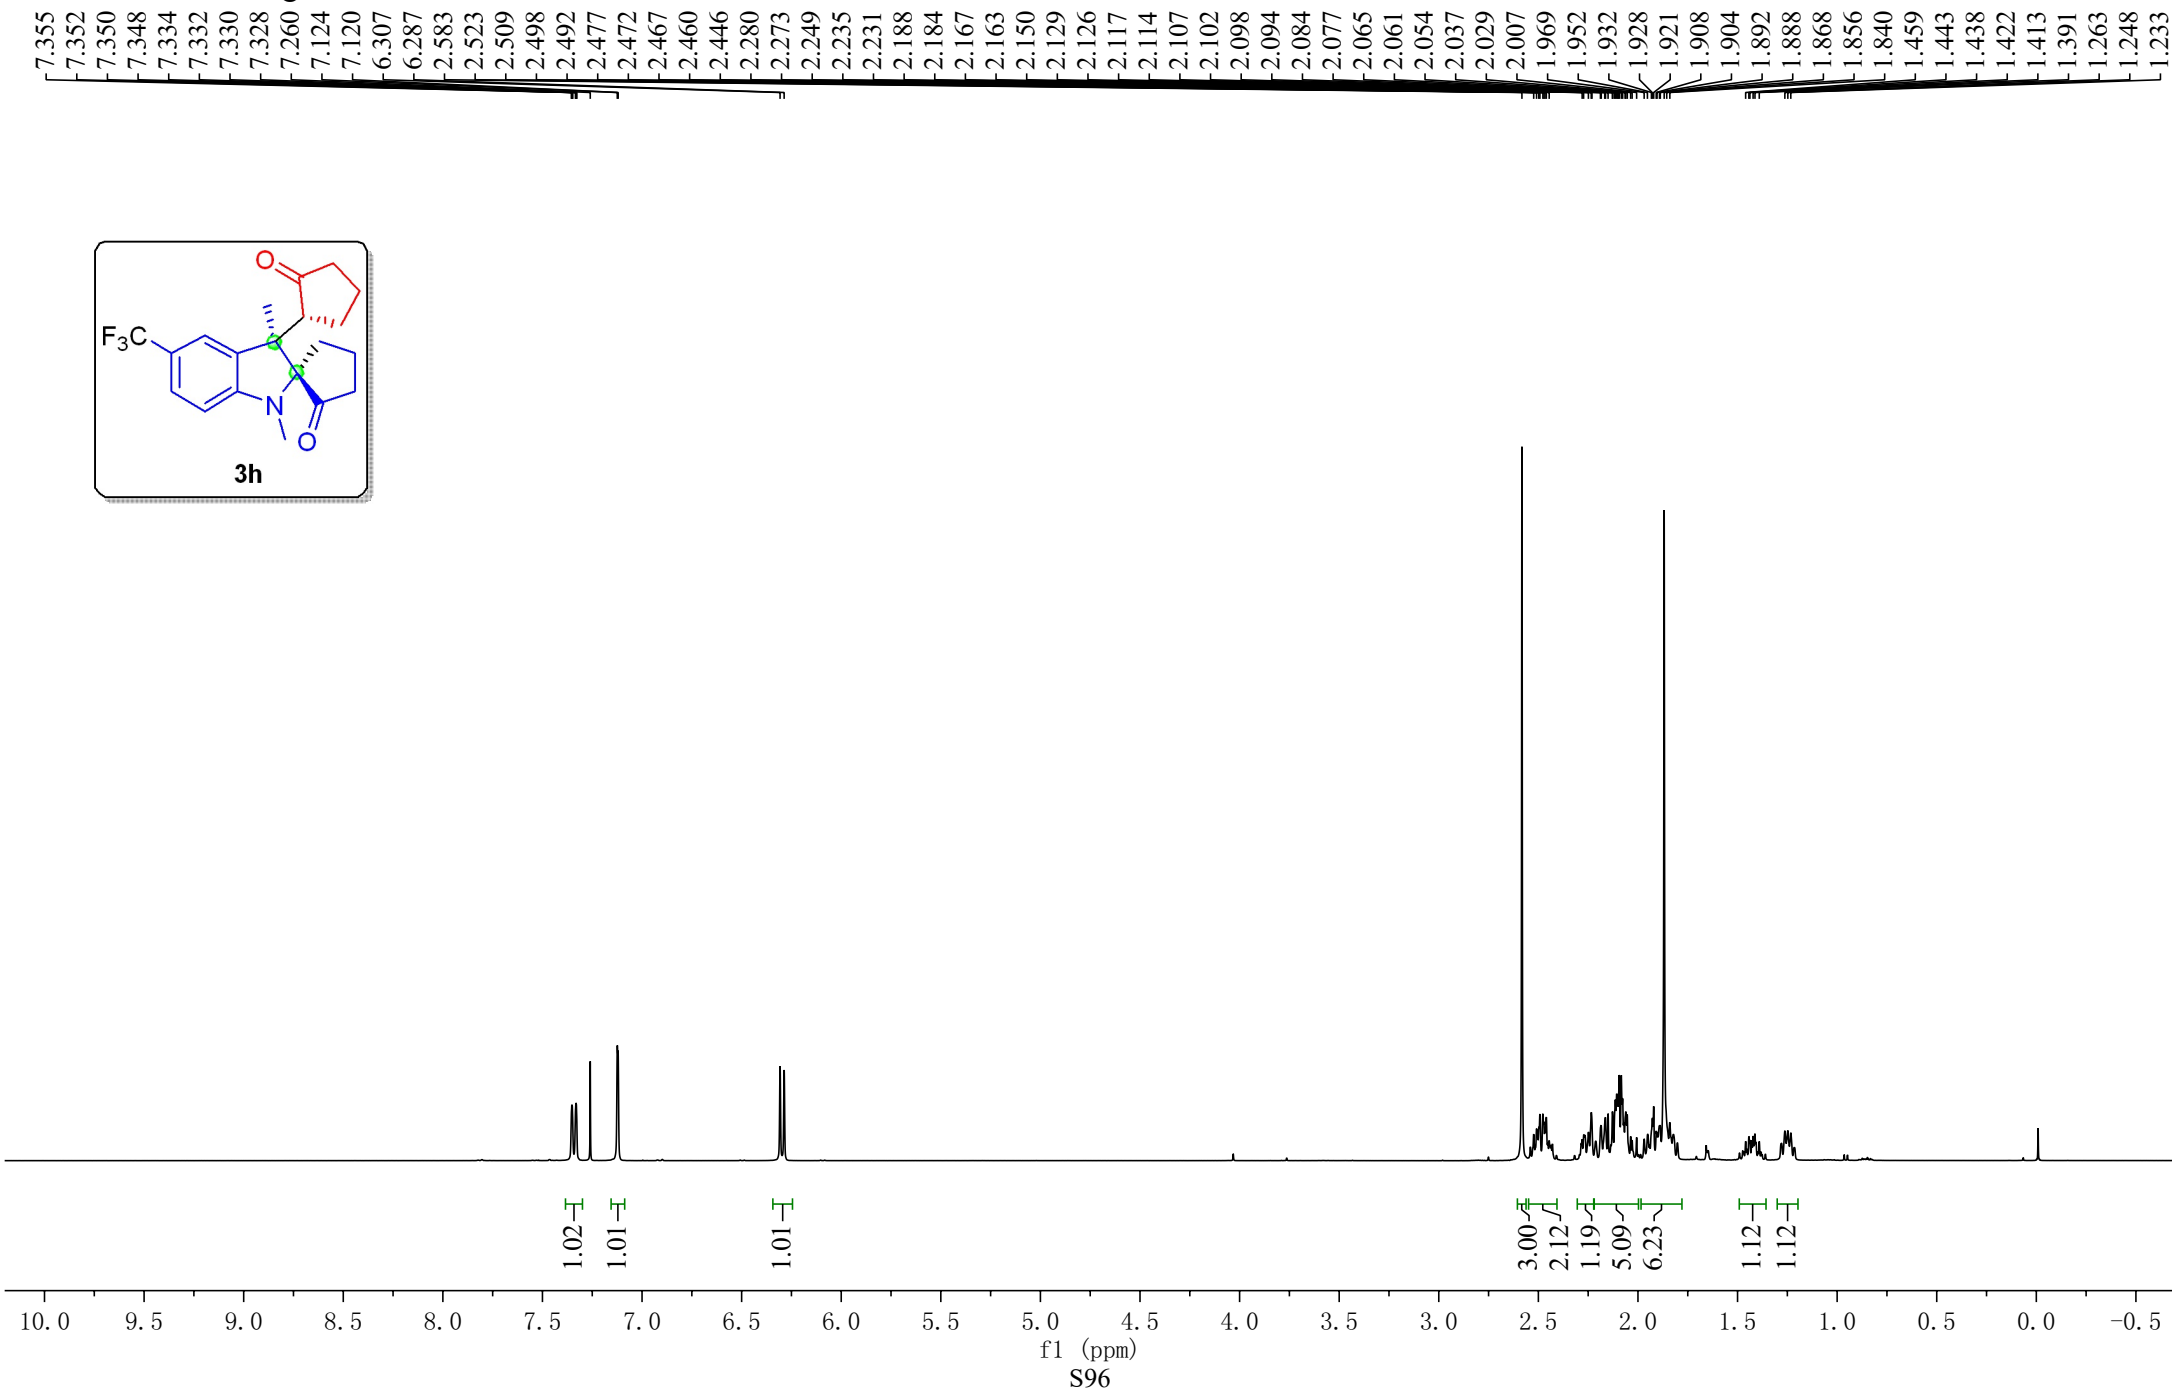

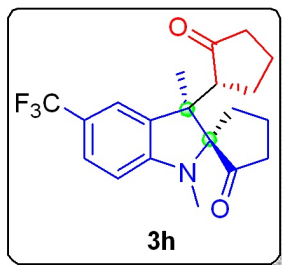

219.94  
219.02

152.60  
134.74  
126.44  
126.33  
126.29  
126.25  
123.75  
119.43  
119.11  
118.76  
118.72  
118.69  
108.65

83.03

77.00 Chloroform-d

60.93

52.20

39.63

37.62

29.07

27.36

25.96

19.78

19.63

17.22

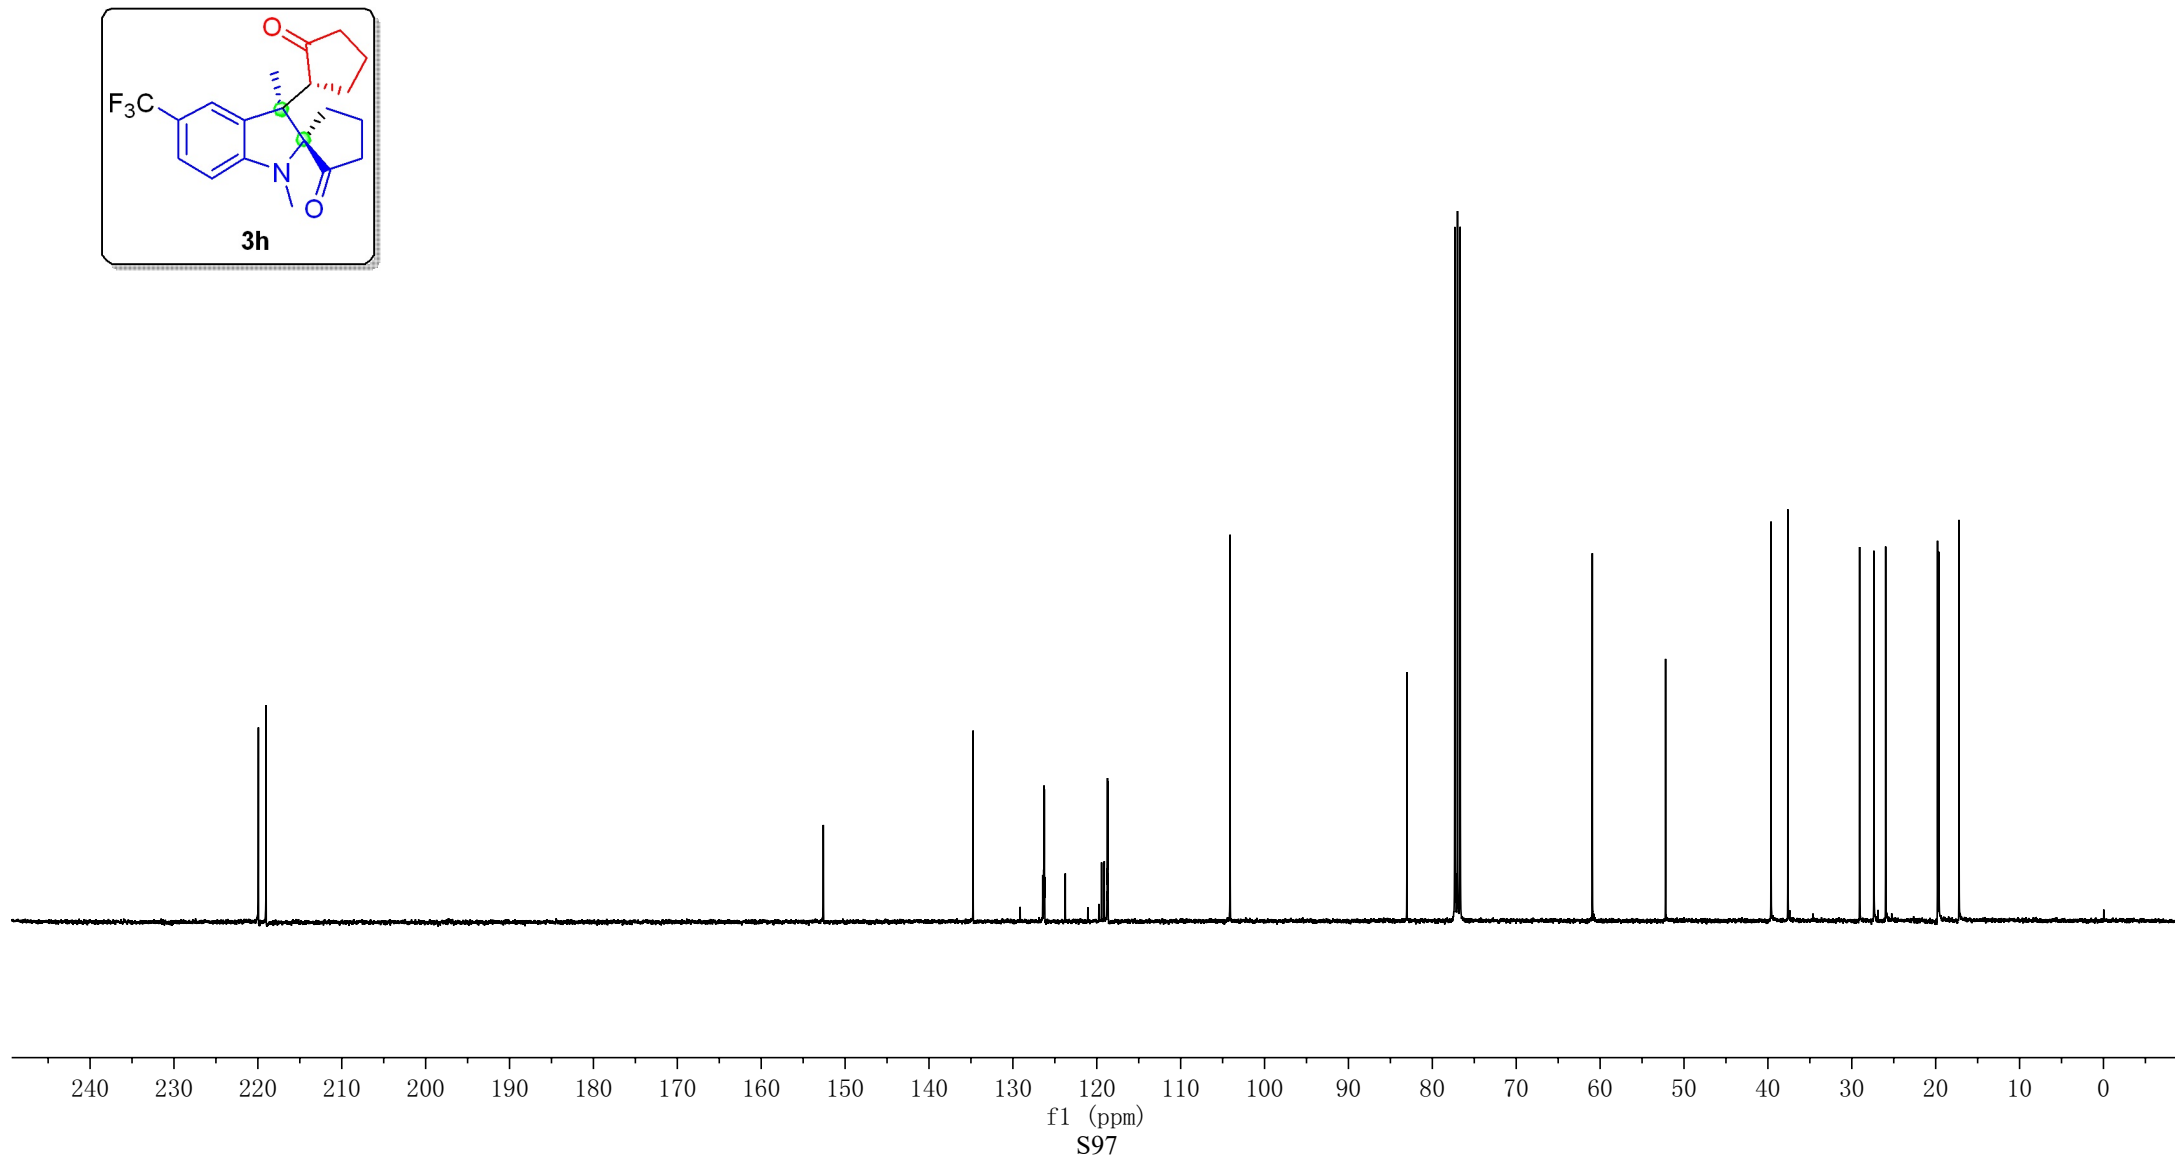

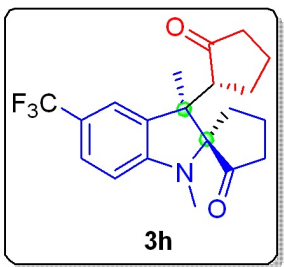

---60.35

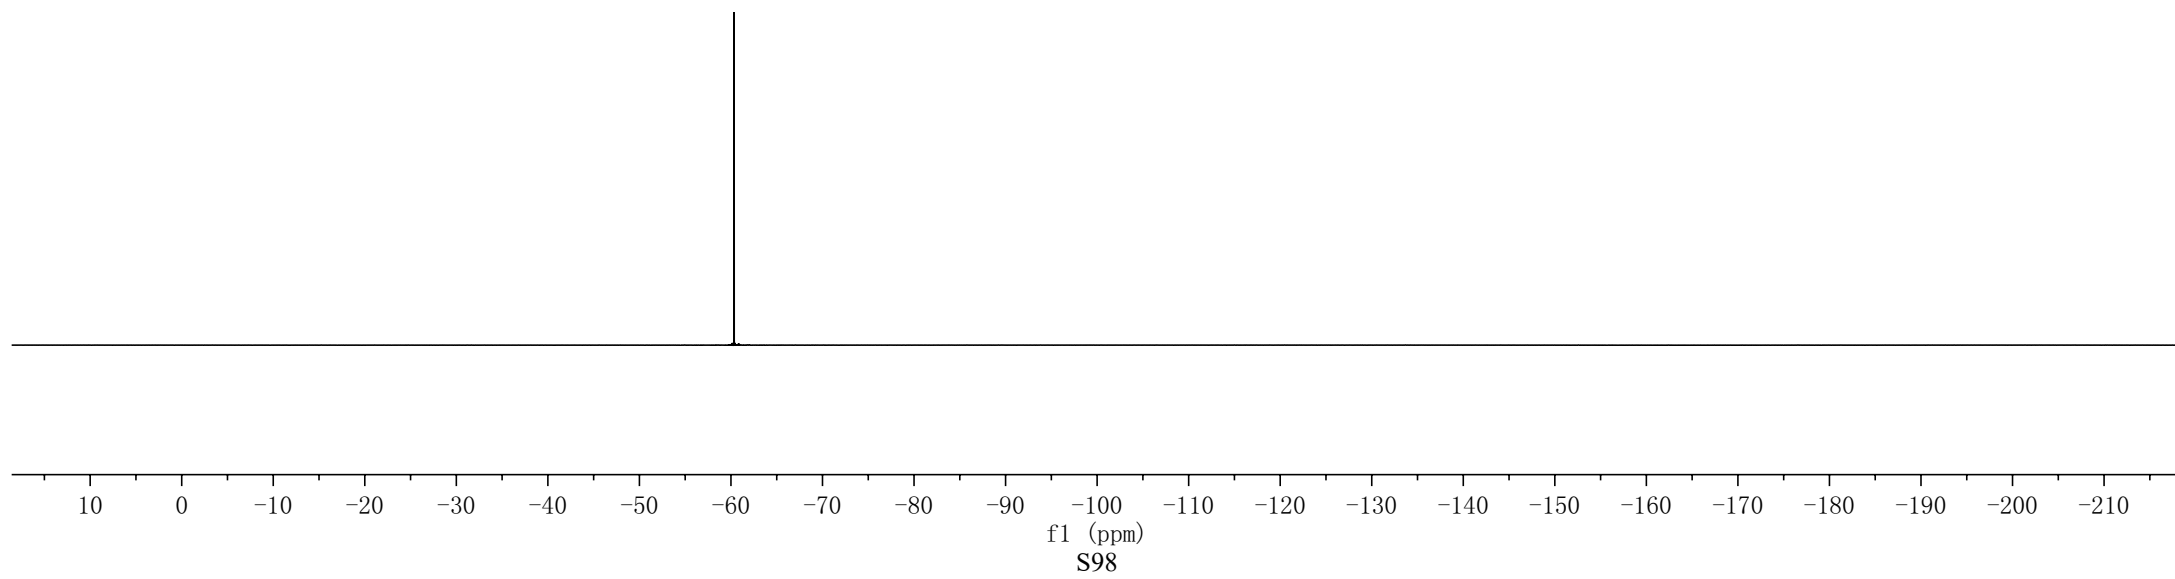

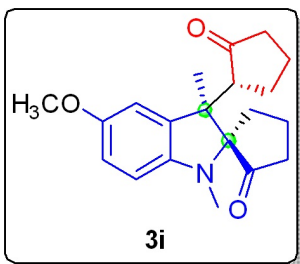

— 7.260 Chloroform-d

6.644  
6.638  
6.622  
6.218  
6.197

— 3.748

2.487  
2.191  
2.165  
2.145  
2.128  
2.107  
2.100  
2.079  
2.067  
2.063  
1.906  
1.811  
1.435  
1.422  
1.405  
1.400  
1.390  
1.384  
1.374  
1.353  
1.324  
1.305  
1.291  
1.276  
1.257  
1.240

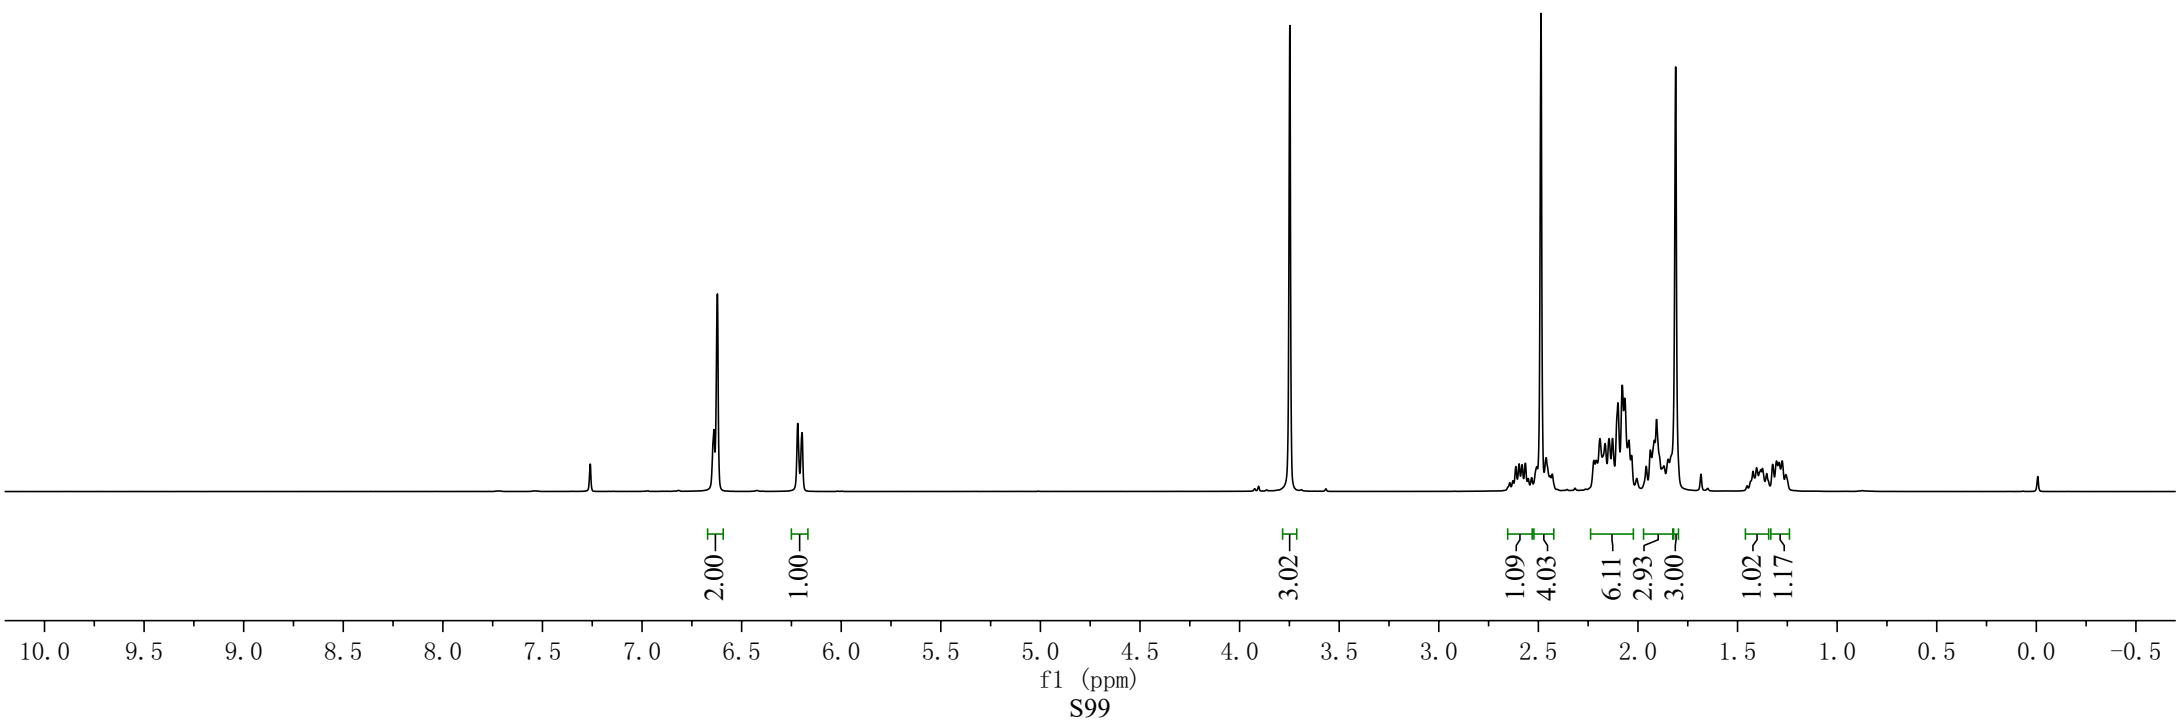

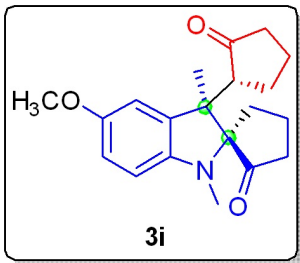

~220.73  
~219.33

—152.93  
—144.74  
—136.13

~111.59  
~109.97  
~105.15

—83.07  
—77.00 Chloroform-d

~60.89  
~55.97  
~52.36

~39.75  
~37.62  
~29.94  
~26.29  
~26.10  
~19.93  
~19.67  
~17.14

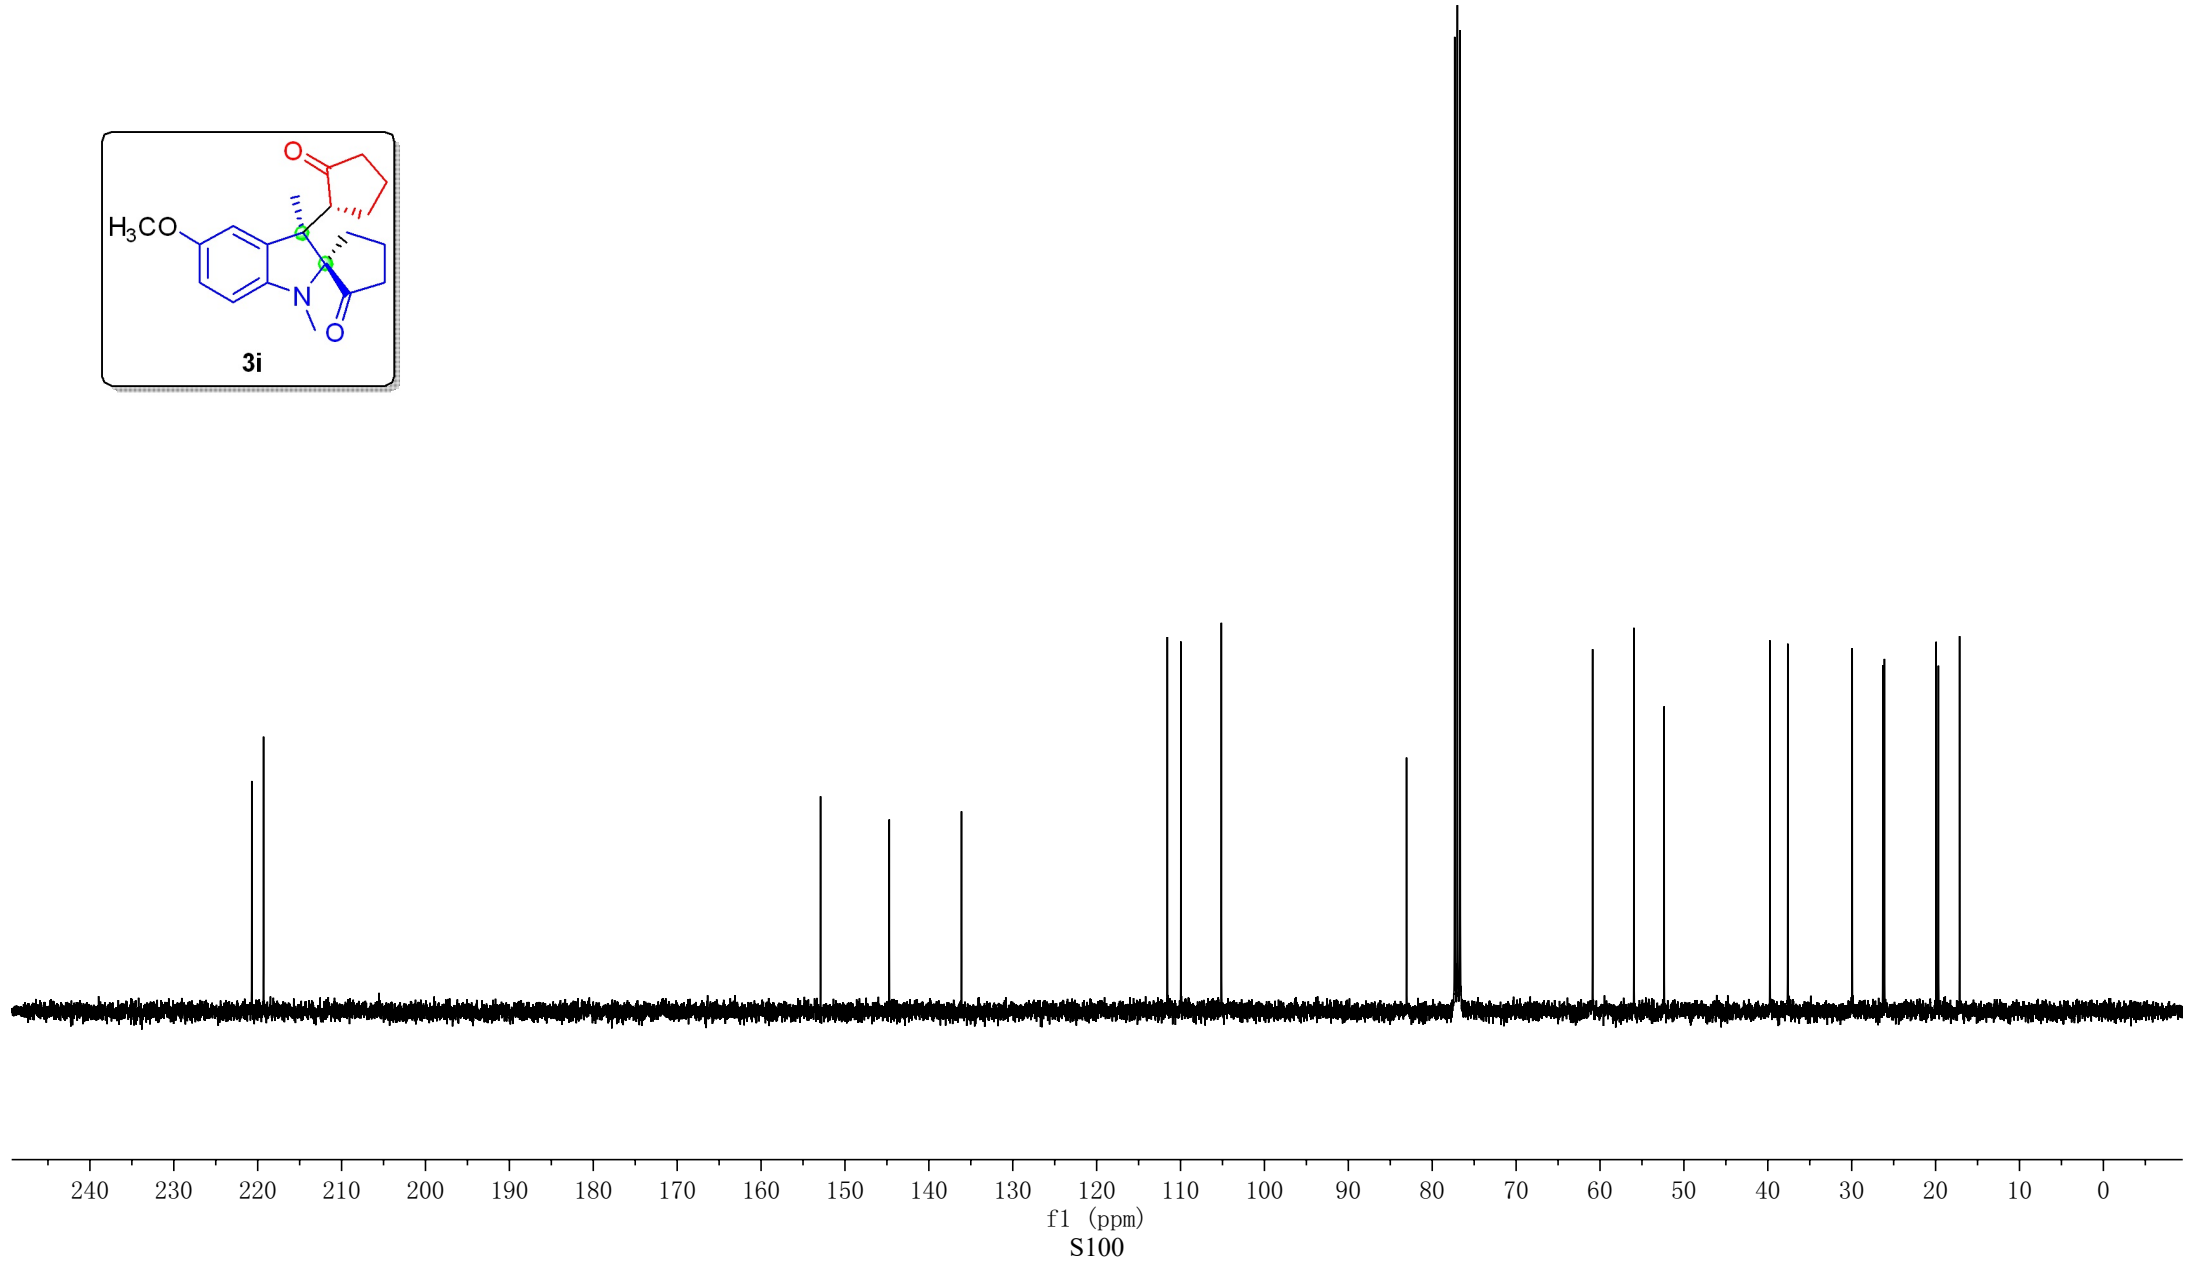



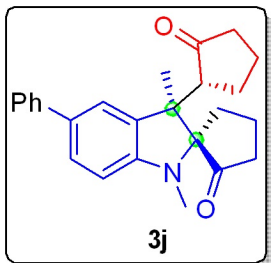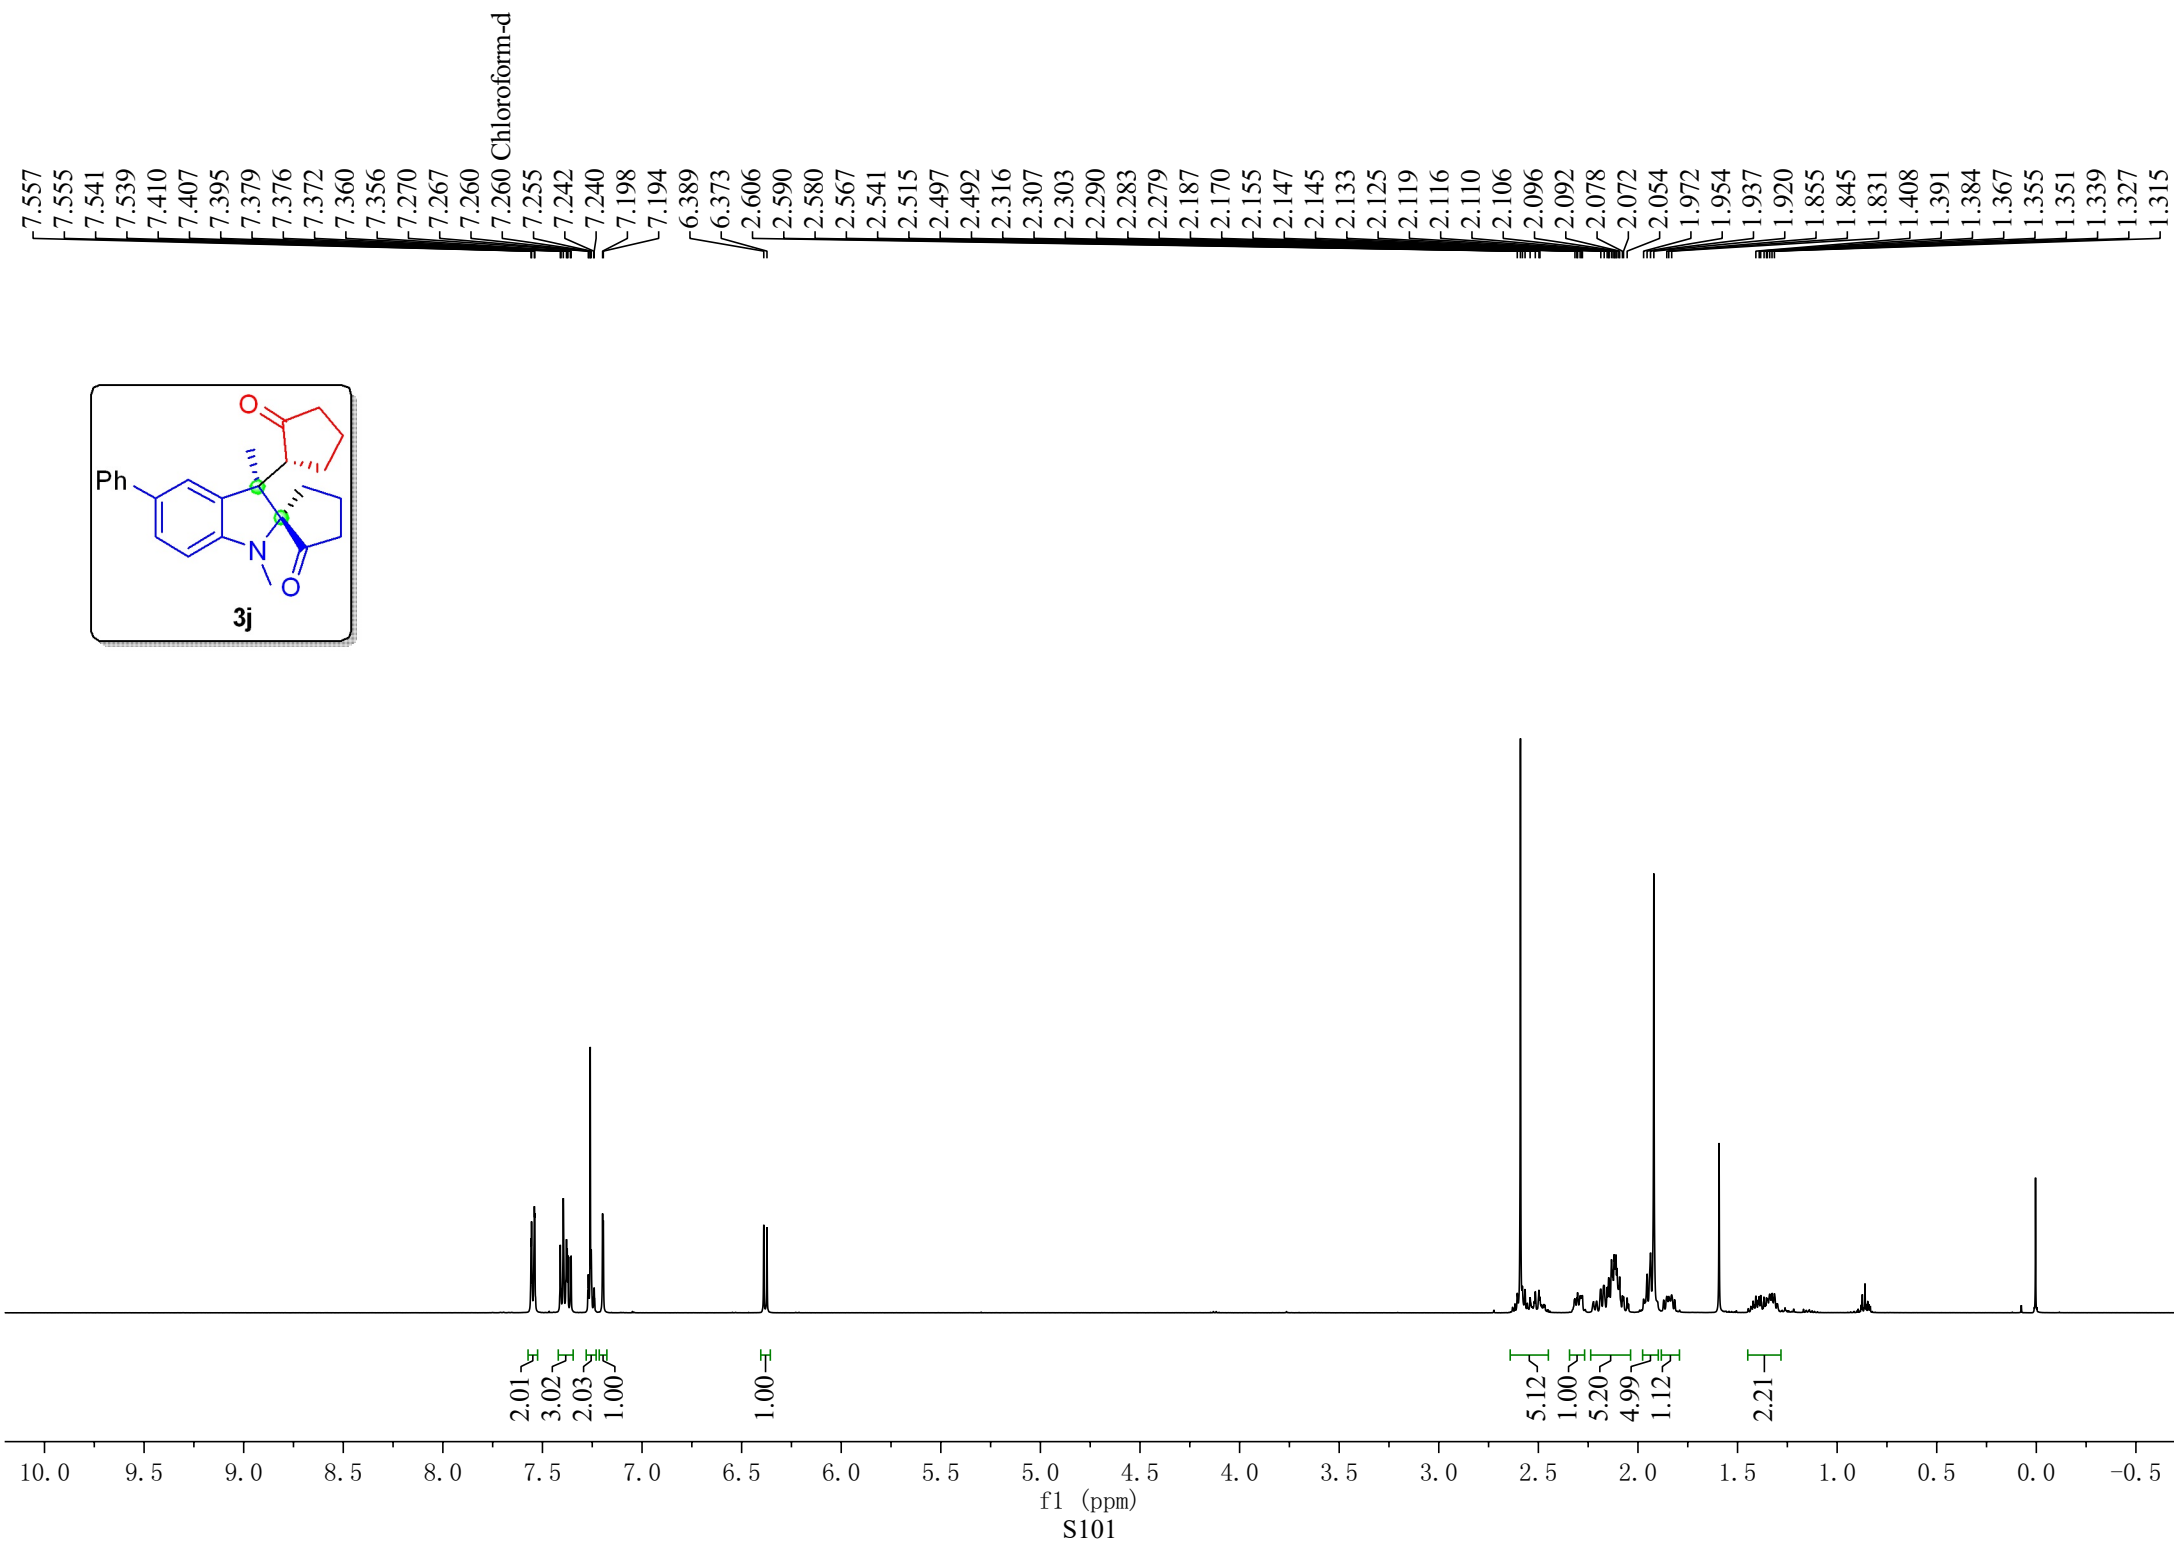



220.65  
219.45

149.79  
141.54  
135.10  
130.90  
128.62  
127.01  
126.22  
125.96  
120.51

105.25

83.06

77.00 Chloroform-d

61.25

52.51

39.78

37.67

29.37

26.81

26.17

19.88

19.79

17.23

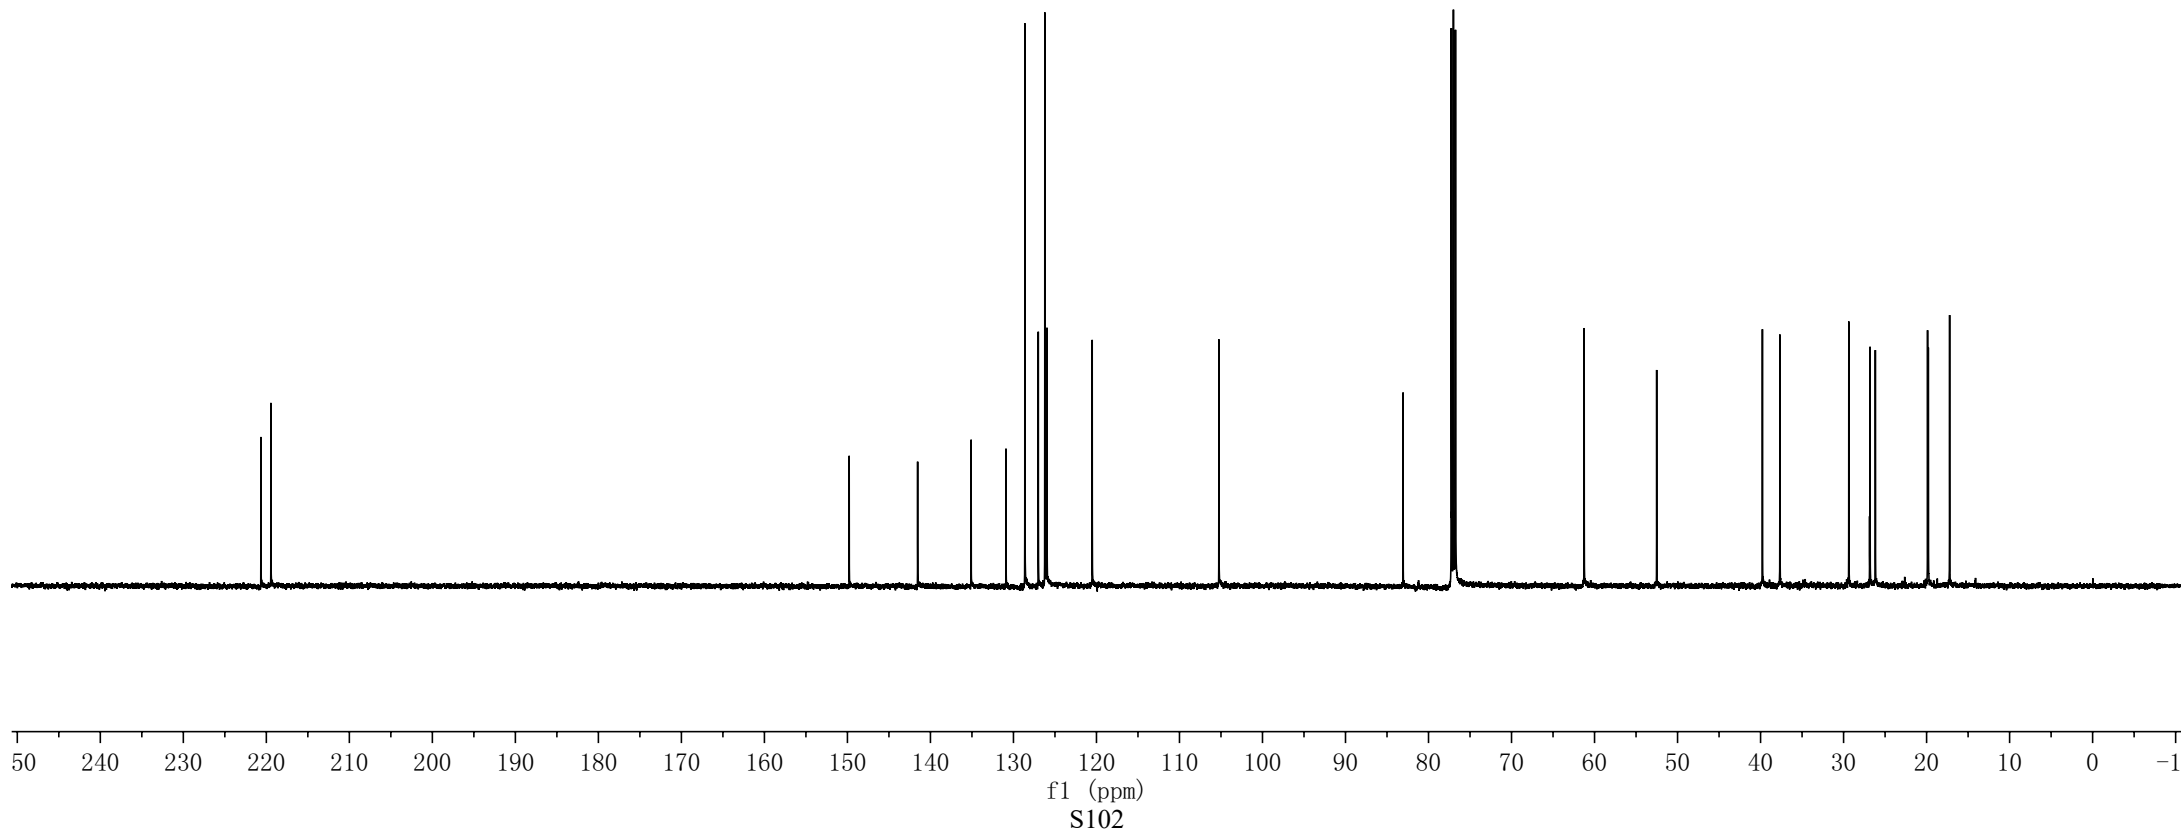

7.160 Benzene-d6

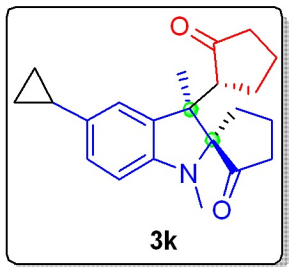

3k

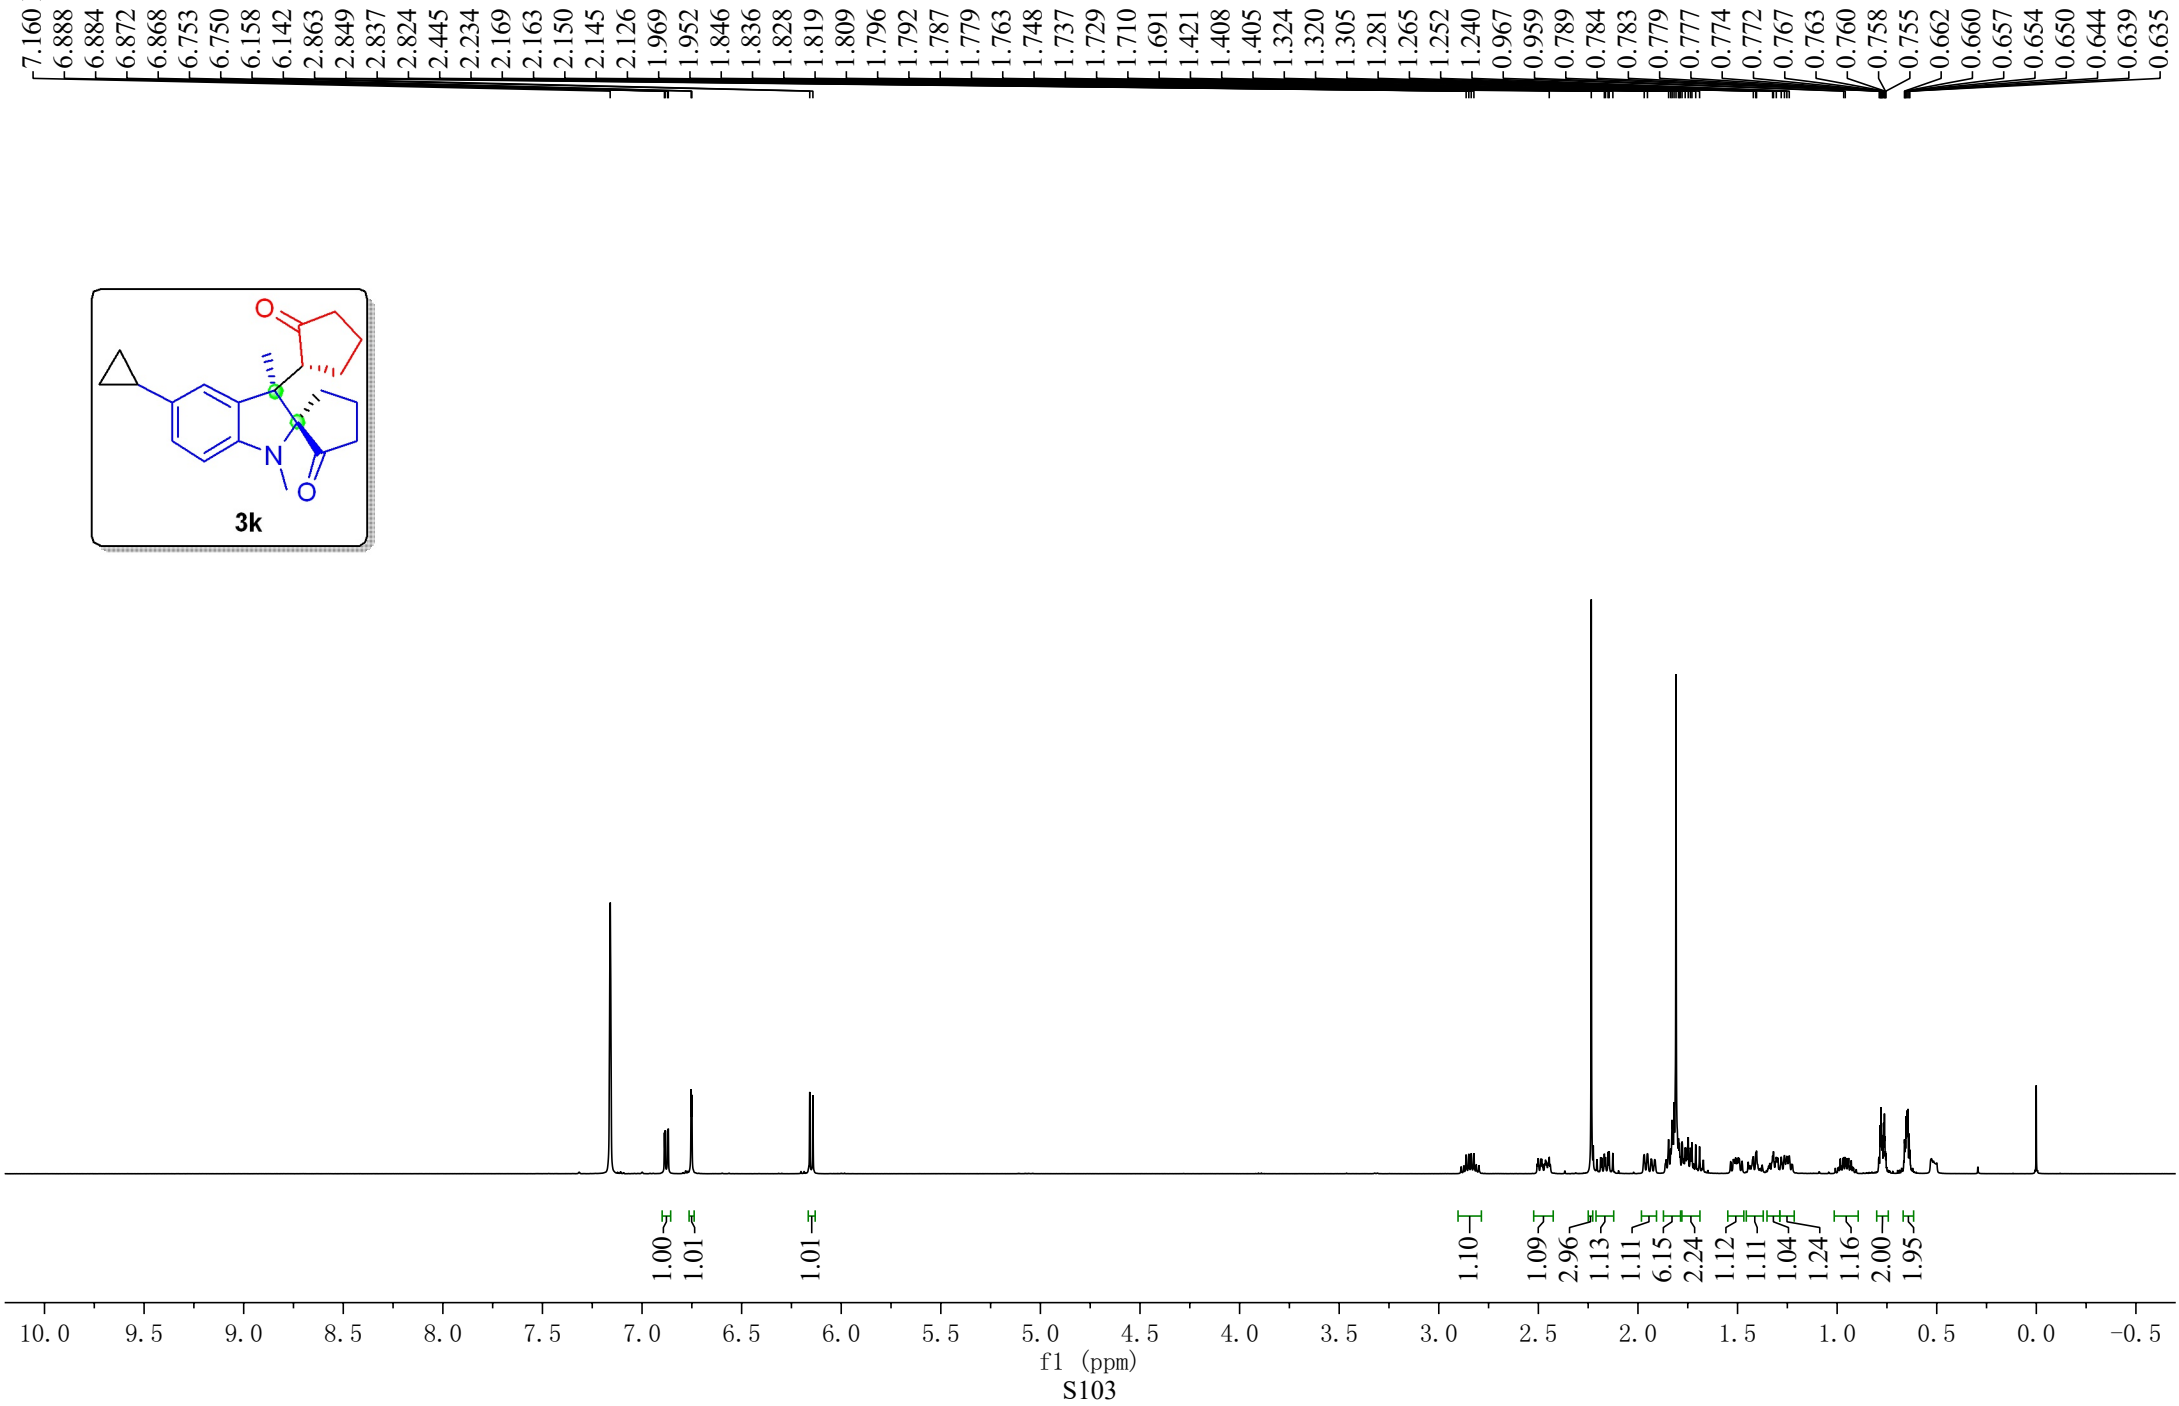

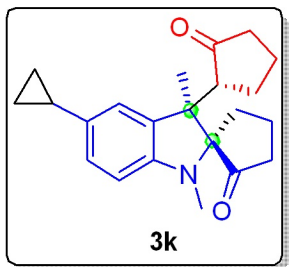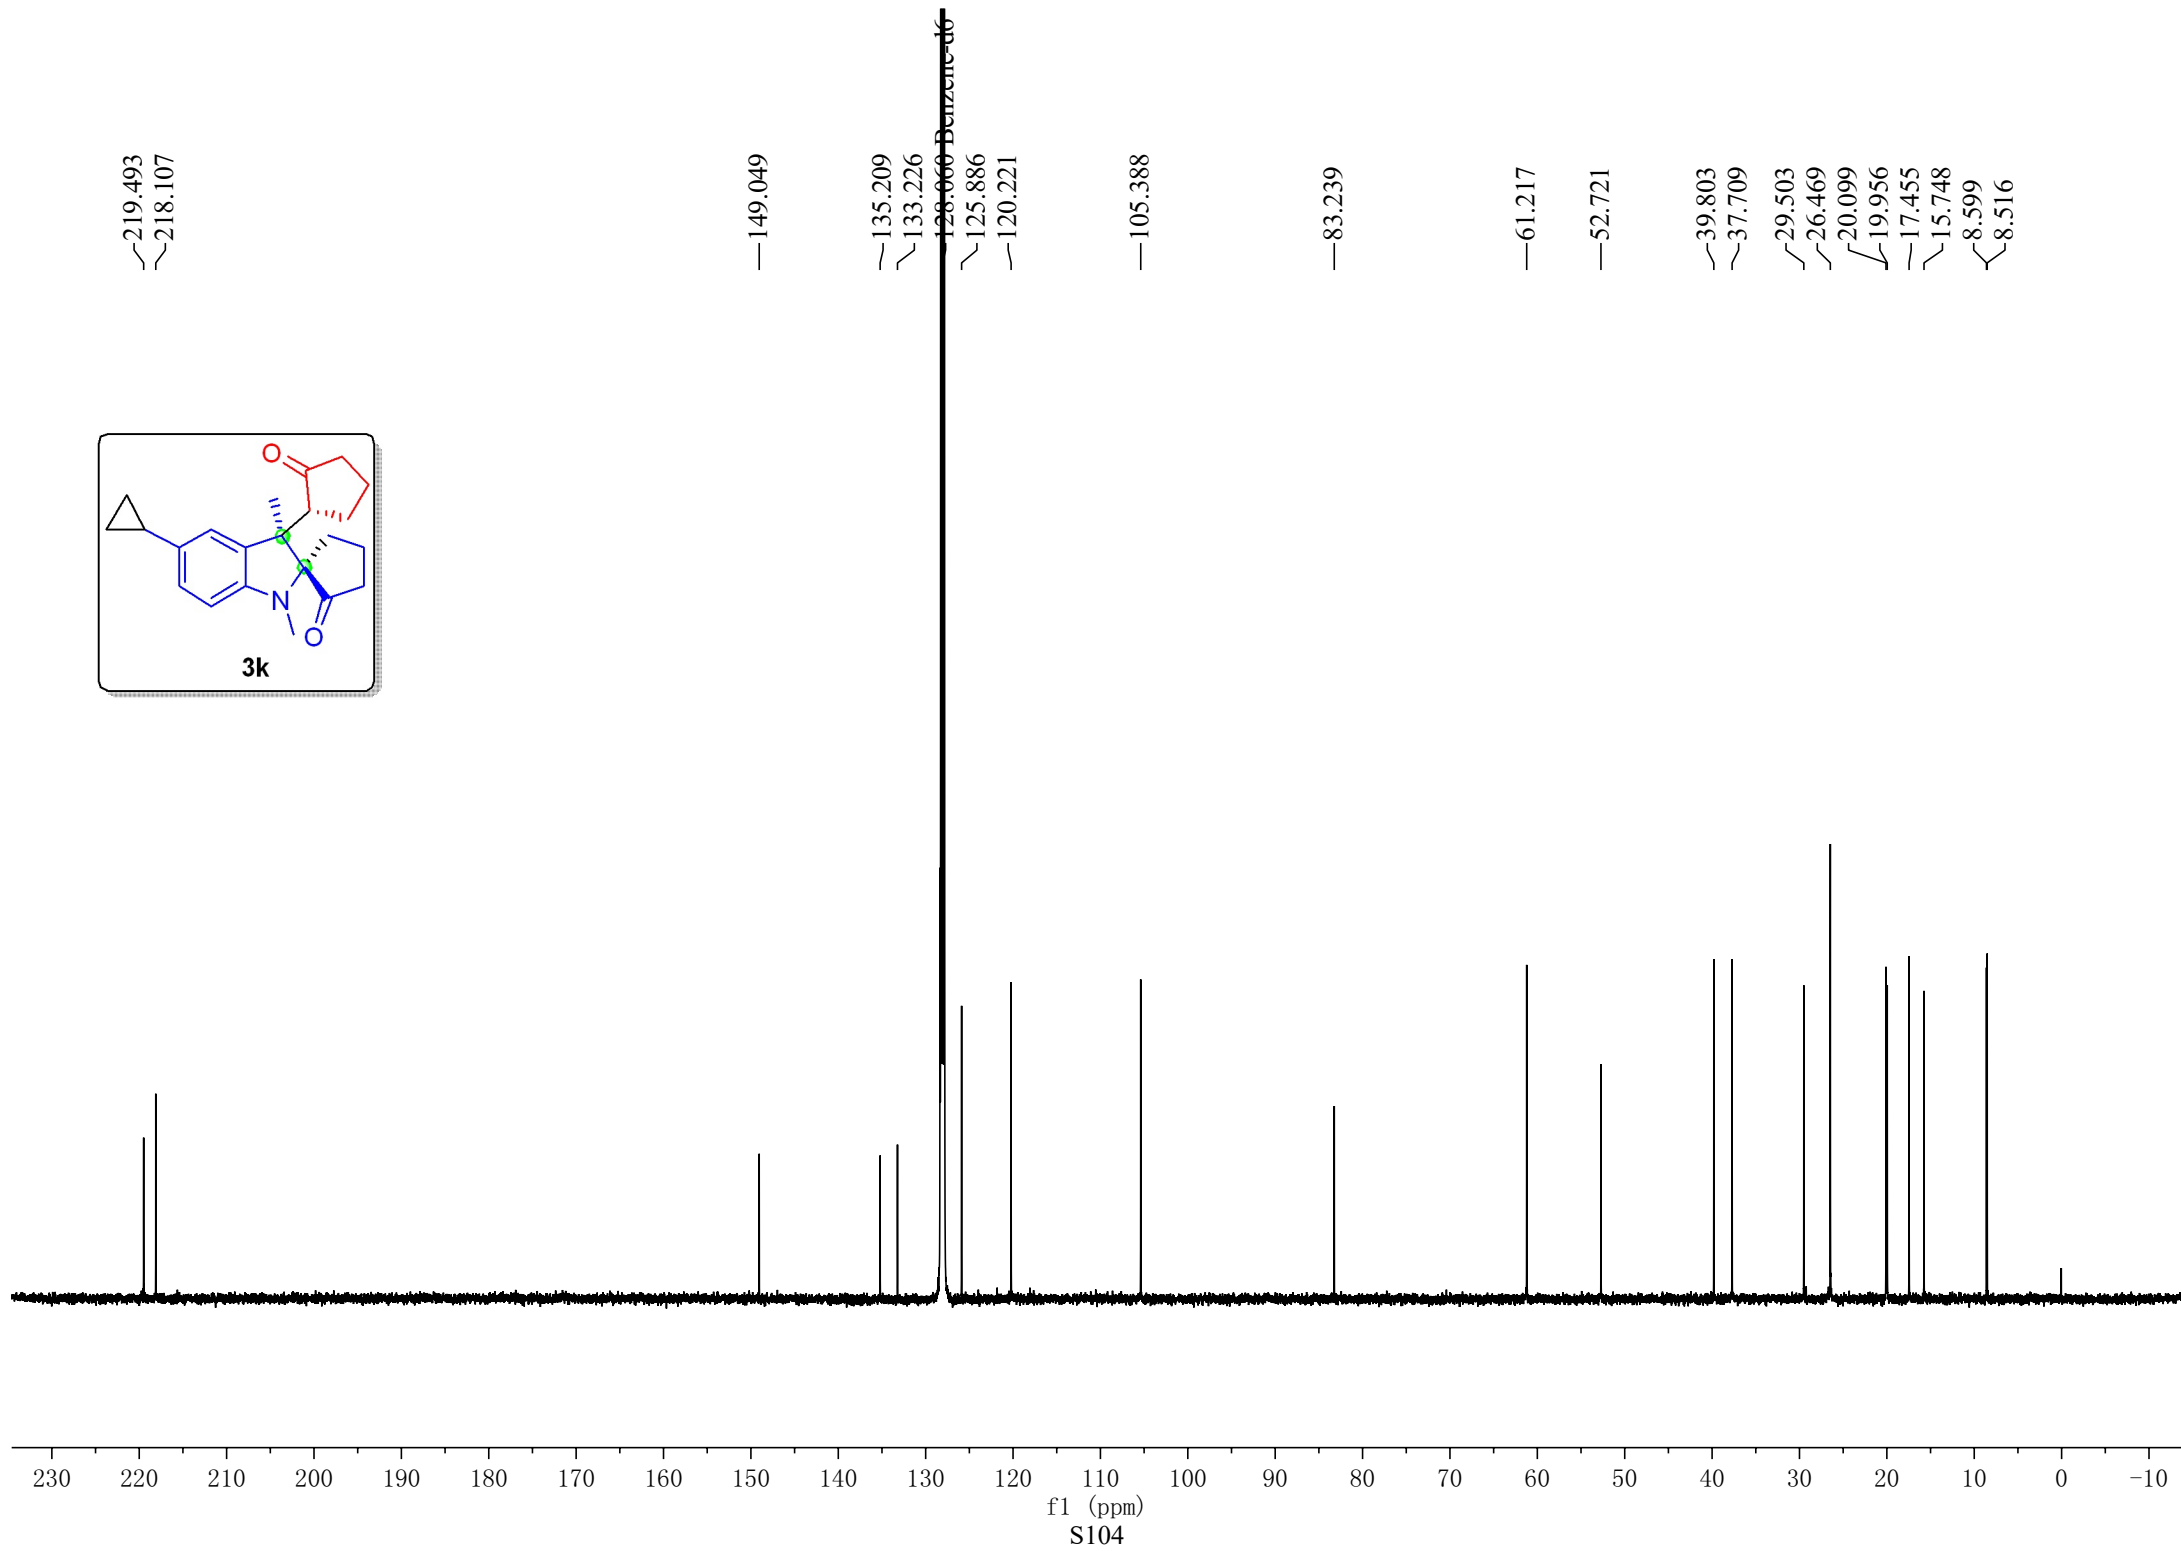

7.260 Chloroform-d

6.723  
6.715  
6.700  
6.695  
6.222  
6.205  
3.000  
2.988  
2.977  
2.967  
2.957  
2.946  
2.934  
2.603  
2.590  
2.578  
2.565  
2.502  
2.499  
2.486  
2.465  
2.461  
2.455  
2.210  
2.194  
2.183  
2.174  
2.156  
2.139  
2.132  
2.115  
2.099  
2.094  
2.076  
2.066  
2.058  
2.047  
2.039  
2.032  
2.017  
1.941  
1.924  
1.910  
1.899  
1.886  
1.876  
1.871  
1.841  
1.825  
1.801  
1.752  
1.741  
1.729  
1.717  
1.706  
1.550  
1.538  
1.526  
1.514  
1.502  
1.362  
1.352  
1.346  
1.338  
1.298  
1.283  
1.271  
1.259  
1.254

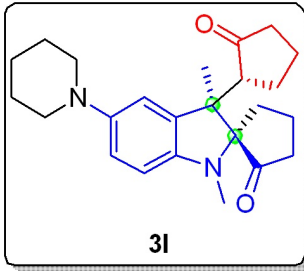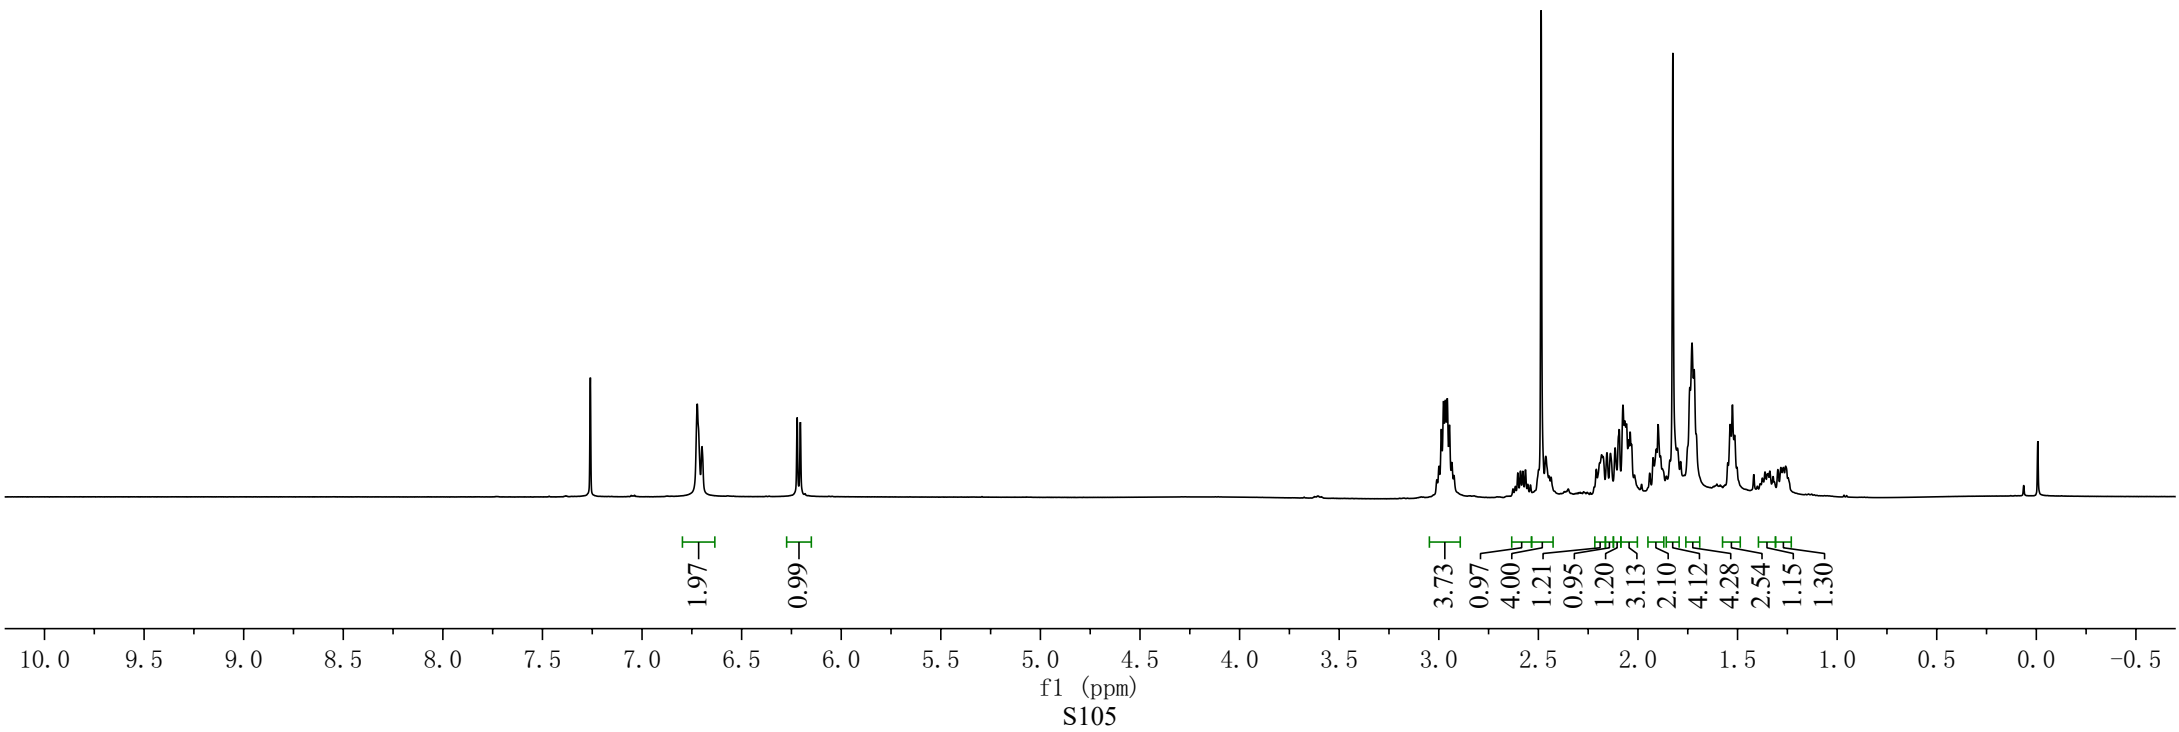

221.06  
219.68

145.77  
145.06

135.47

116.46  
114.48

104.98

83.08

77.00 Chloroform-d

61.10

53.34  
52.57

39.83  
37.62

29.79  
26.35

26.27  
26.19

24.14  
19.93

19.72  
17.14

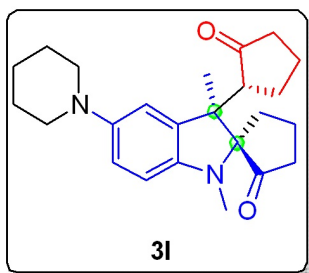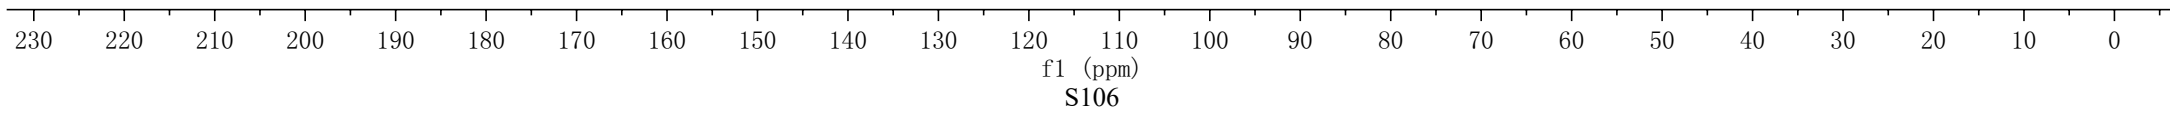

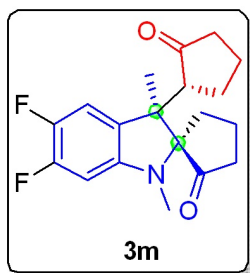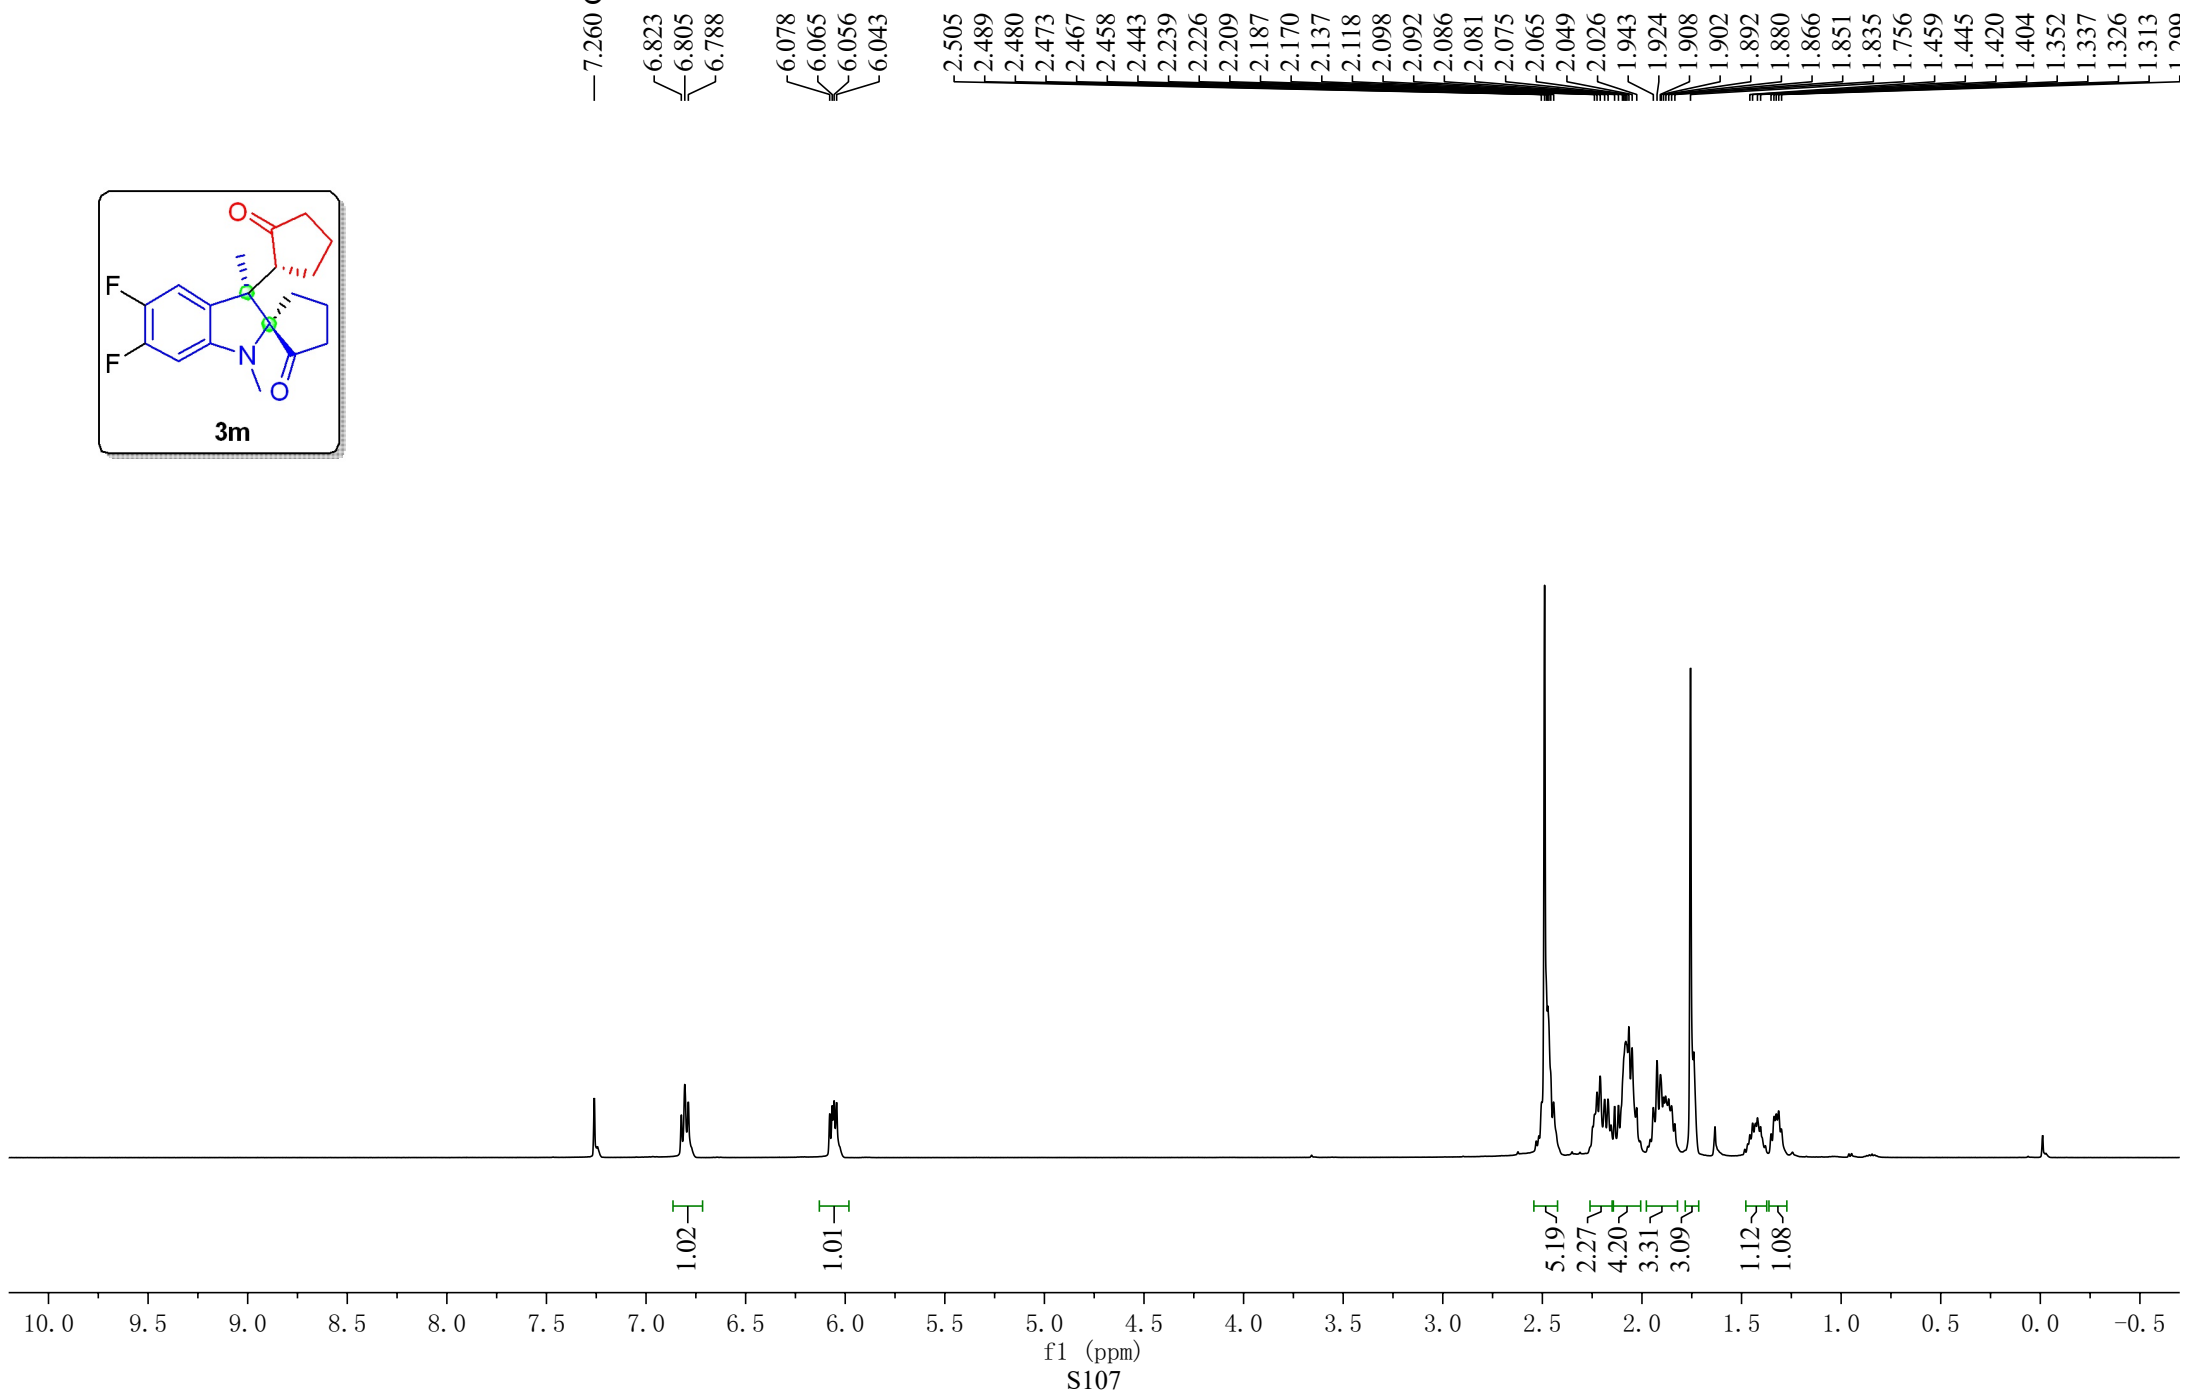

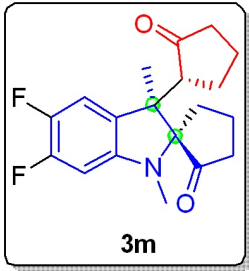

219.80  
218.90

151.37  
151.26  
149.43  
149.32  
146.53  
146.45  
144.36  
144.25  
142.49  
142.38  
129.65

111.31  
111.15

94.63  
94.45

82.87

77.00 Chloroform-d

60.56

51.83

39.62  
37.58

29.66  
26.74  
26.15

19.89  
19.62  
17.11

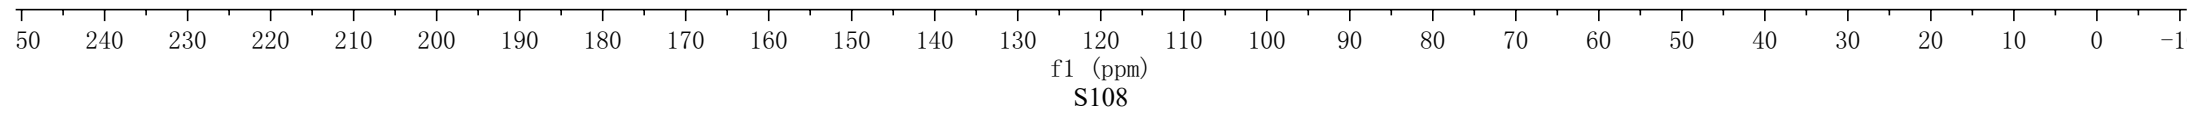



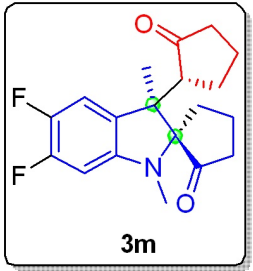

-139.35  
-139.39

-152.55  
-152.59

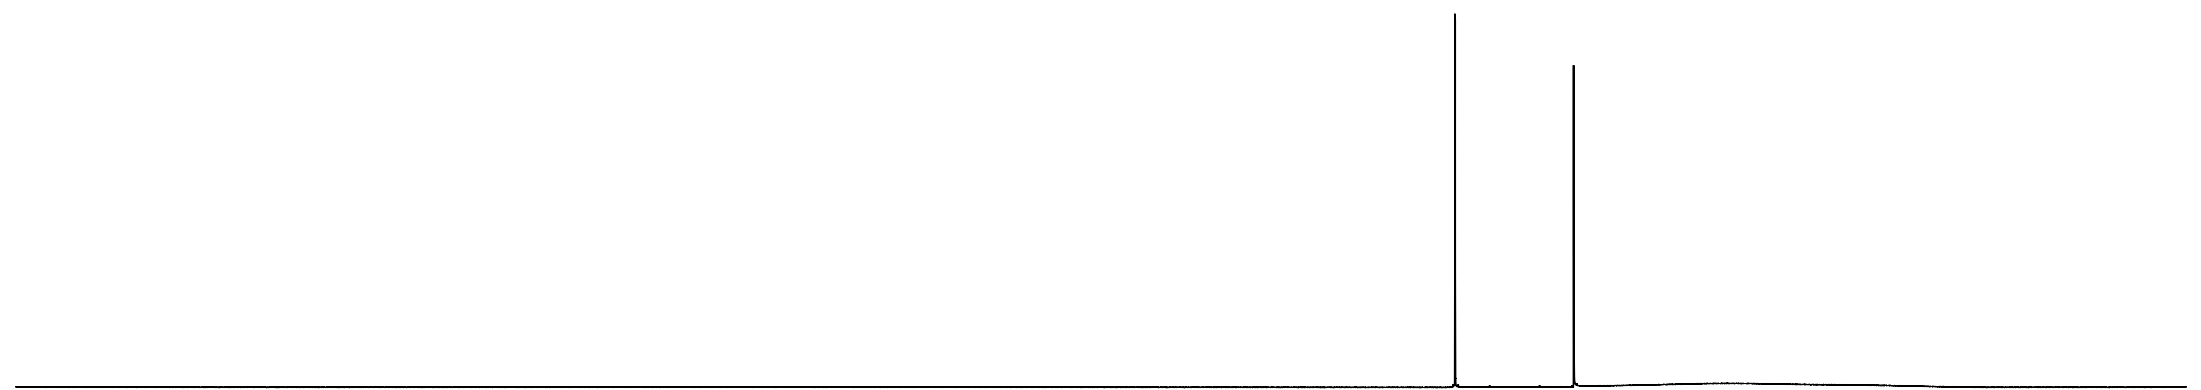

20 10 0 -10 -20 -30 -40 -50 -60 -70 -80 -90 -100 -110 -120 -130 -140 -150 -160 -170 -180 -190 -200 -210 -220

f1 (ppm)  
S109

7.260 Chloroform-d

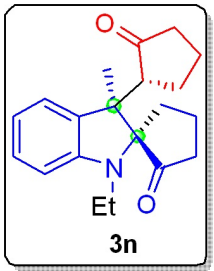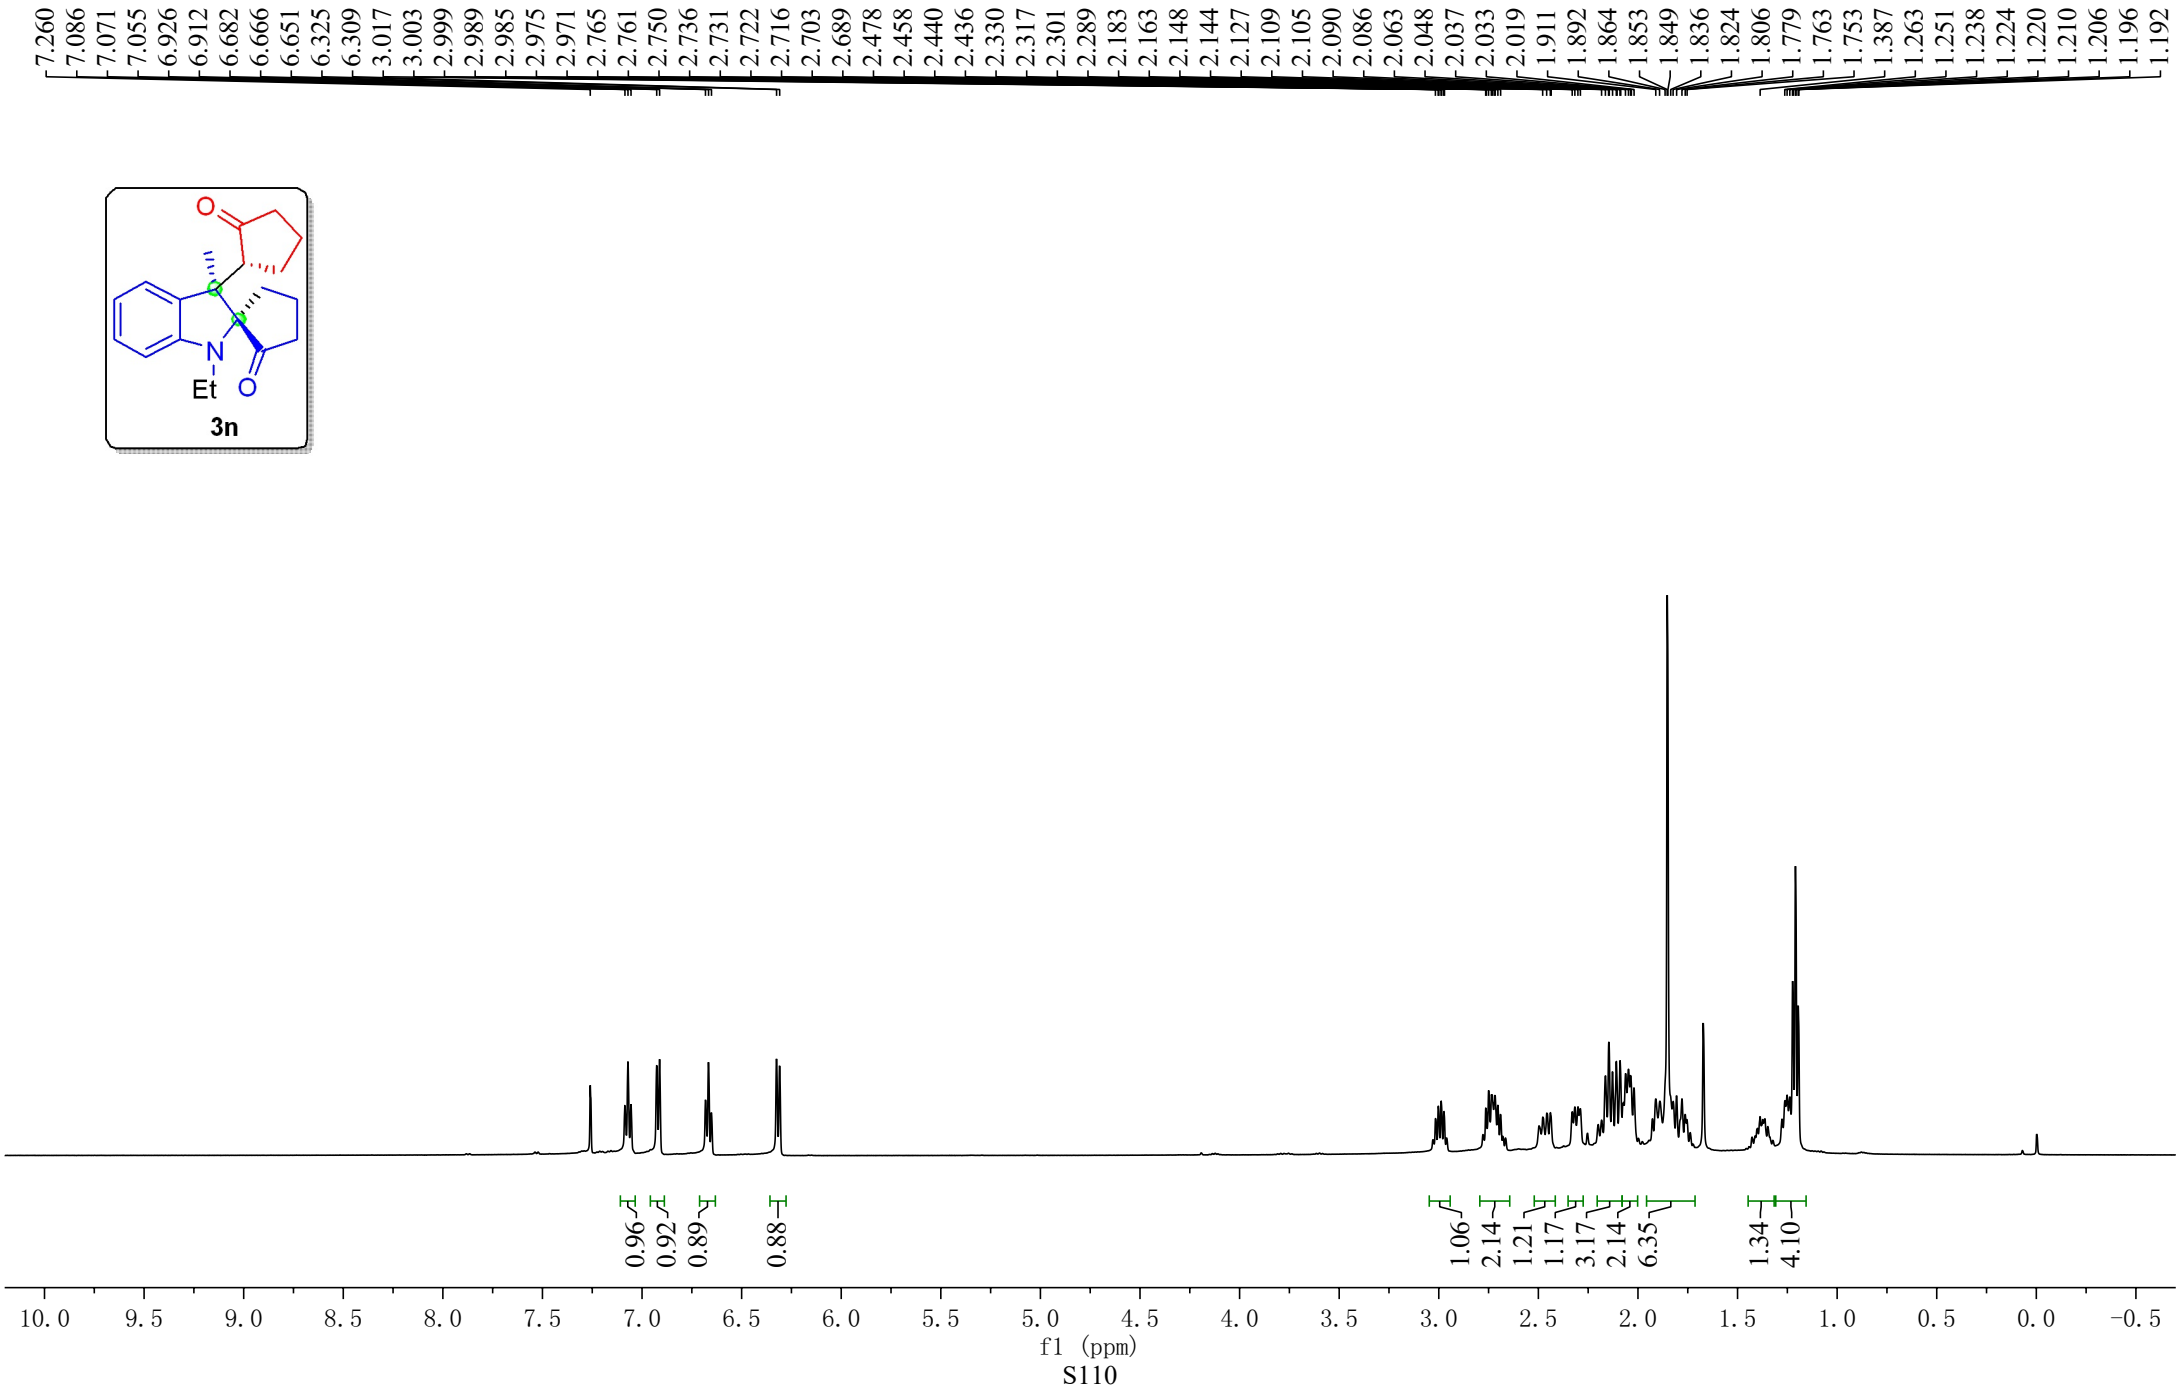

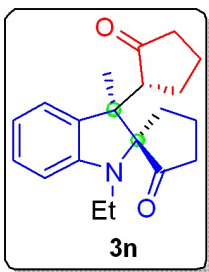

221.23  
219.56

149.32

134.32  
127.99  
121.56  
116.93

104.73

83.43

77.00 Chloroform-d

61.62

52.51

39.79  
39.57  
37.60

28.83

26.01

19.96

19.60

17.21

13.65

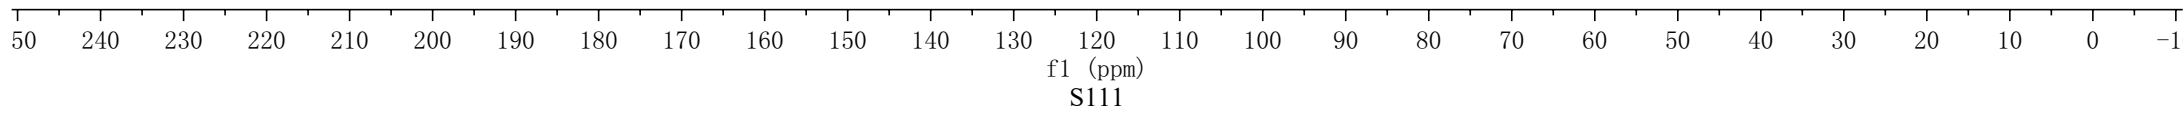

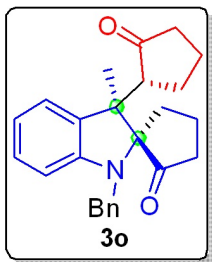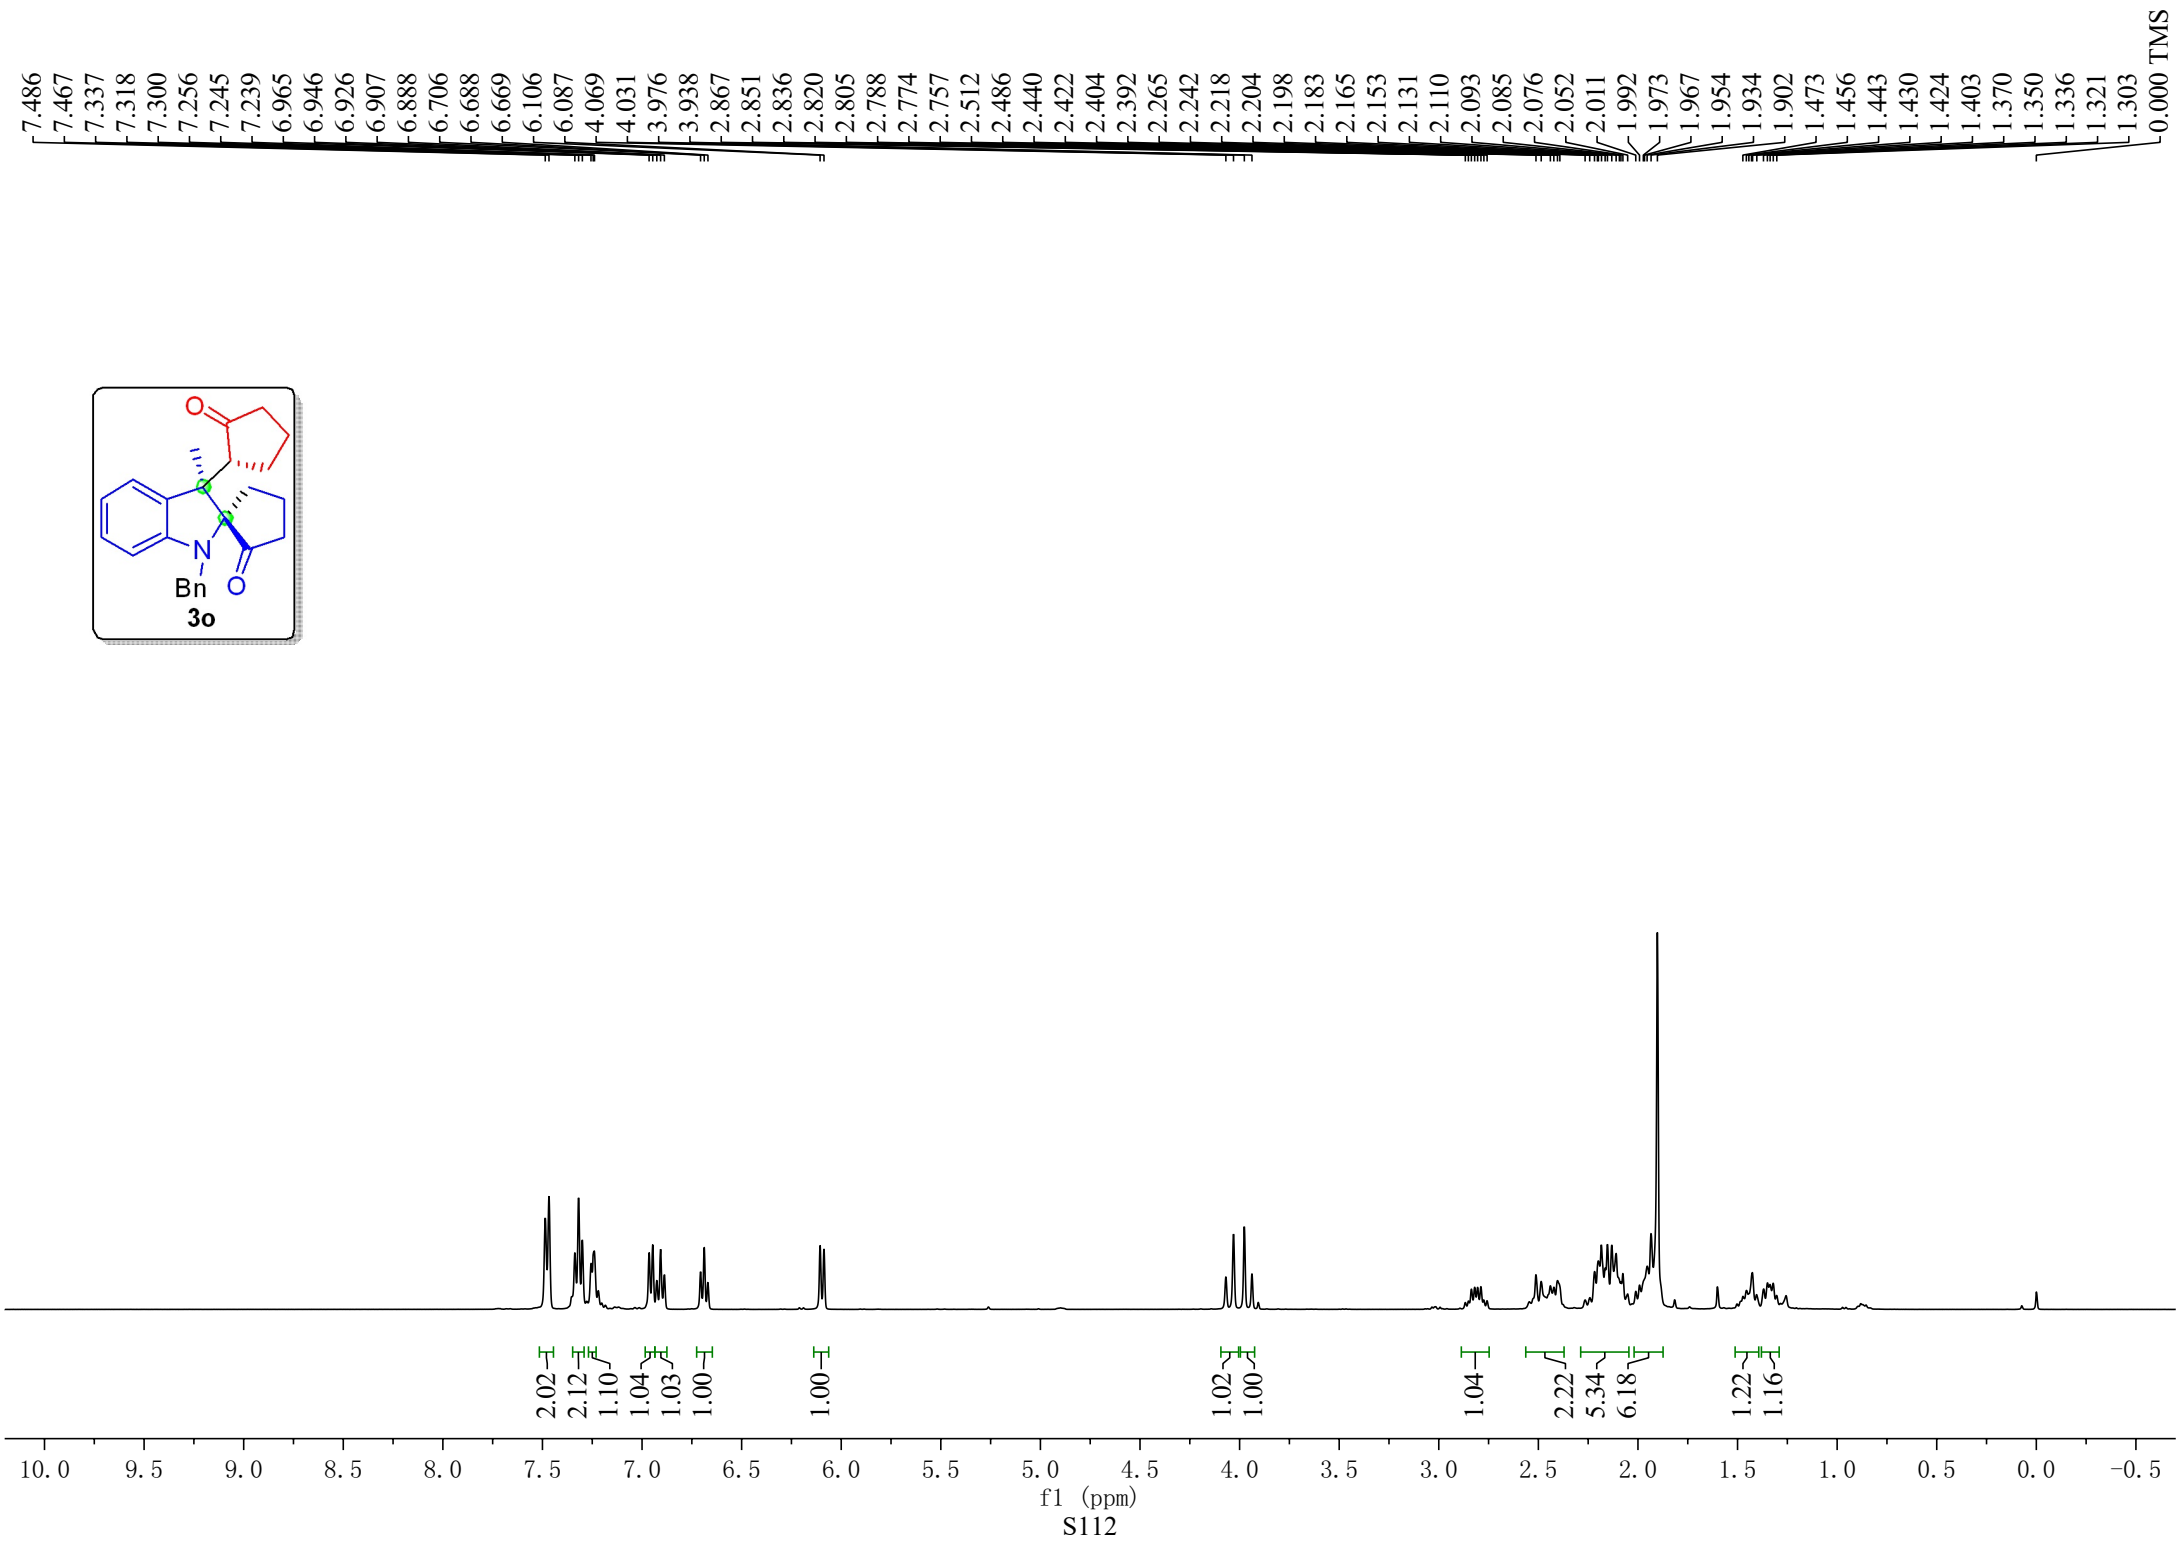



220.98  
219.44

149.90  
138.58  
134.78  
128.45  
127.85  
127.40  
127.04  
121.60  
118.18  
107.30

83.59  
77.00 Chloroform-d

61.40  
52.59  
50.74  
39.80  
37.88  
28.68  
26.42  
20.36  
20.04  
17.45

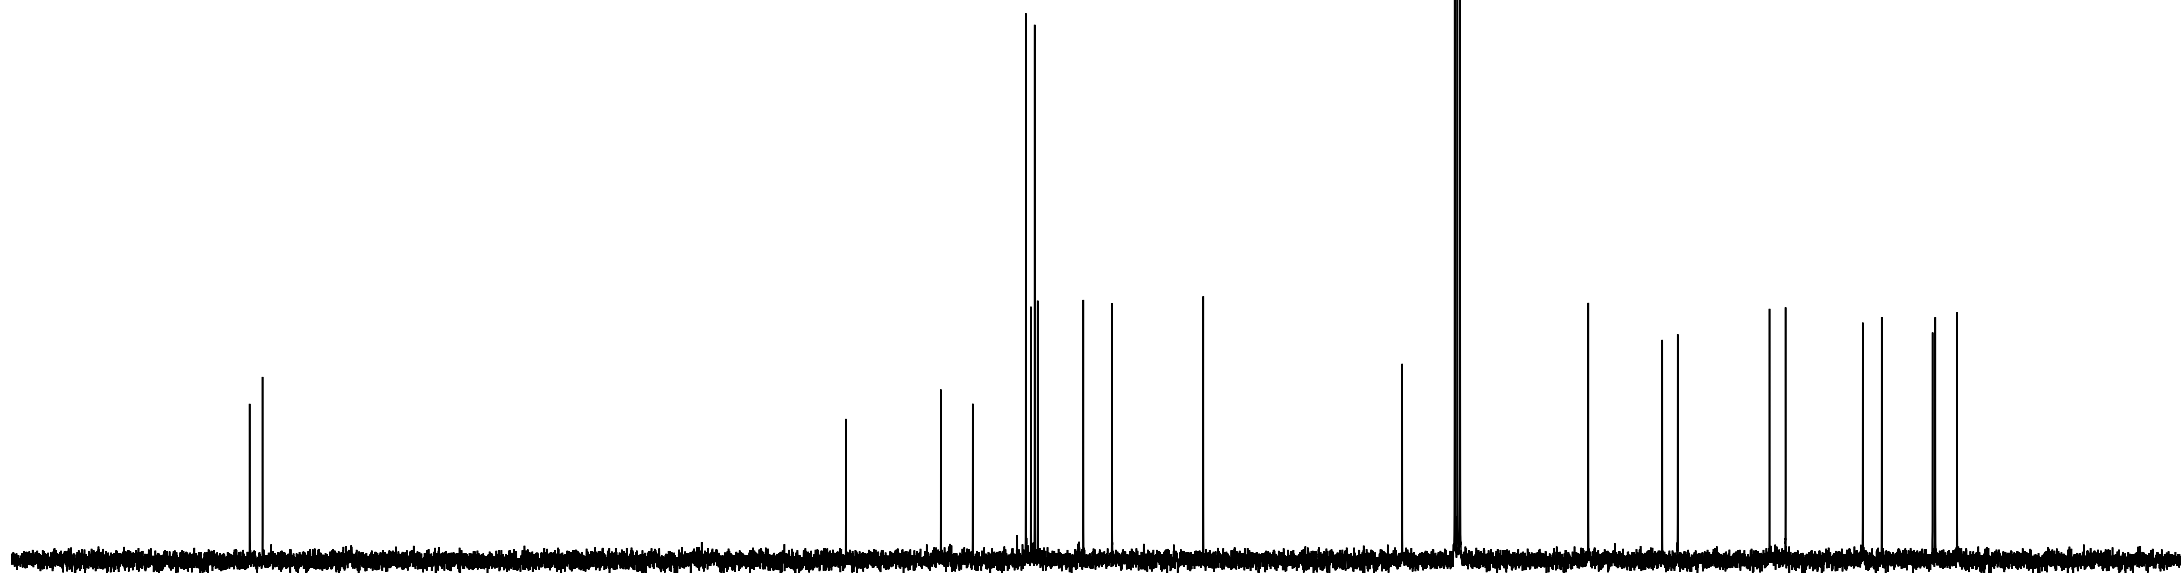

240 230 220 210 200 190 180 170 160 150 140 130 120 110 100 90 80 70 60 50 40 30 20 10 0

f1 (ppm)  
S113

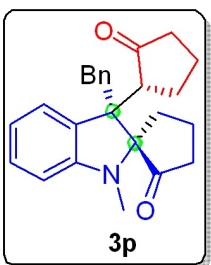

Chloroform-d

7.260  
7.260  
7.249  
7.181  
7.174  
7.167  
7.158  
7.077  
7.059  
7.042  
6.459  
6.440  
6.422  
6.388  
6.368  
6.158  
6.141

3.986  
3.954

3.027  
2.995

2.632  
2.616  
2.613  
2.604  
2.601  
2.425  
2.411  
2.402  
2.389  
2.280  
2.244  
2.223  
2.200  
2.090  
2.076  
2.060  
2.028  
1.913  
1.901  
1.891  
1.882  
1.870  
1.515

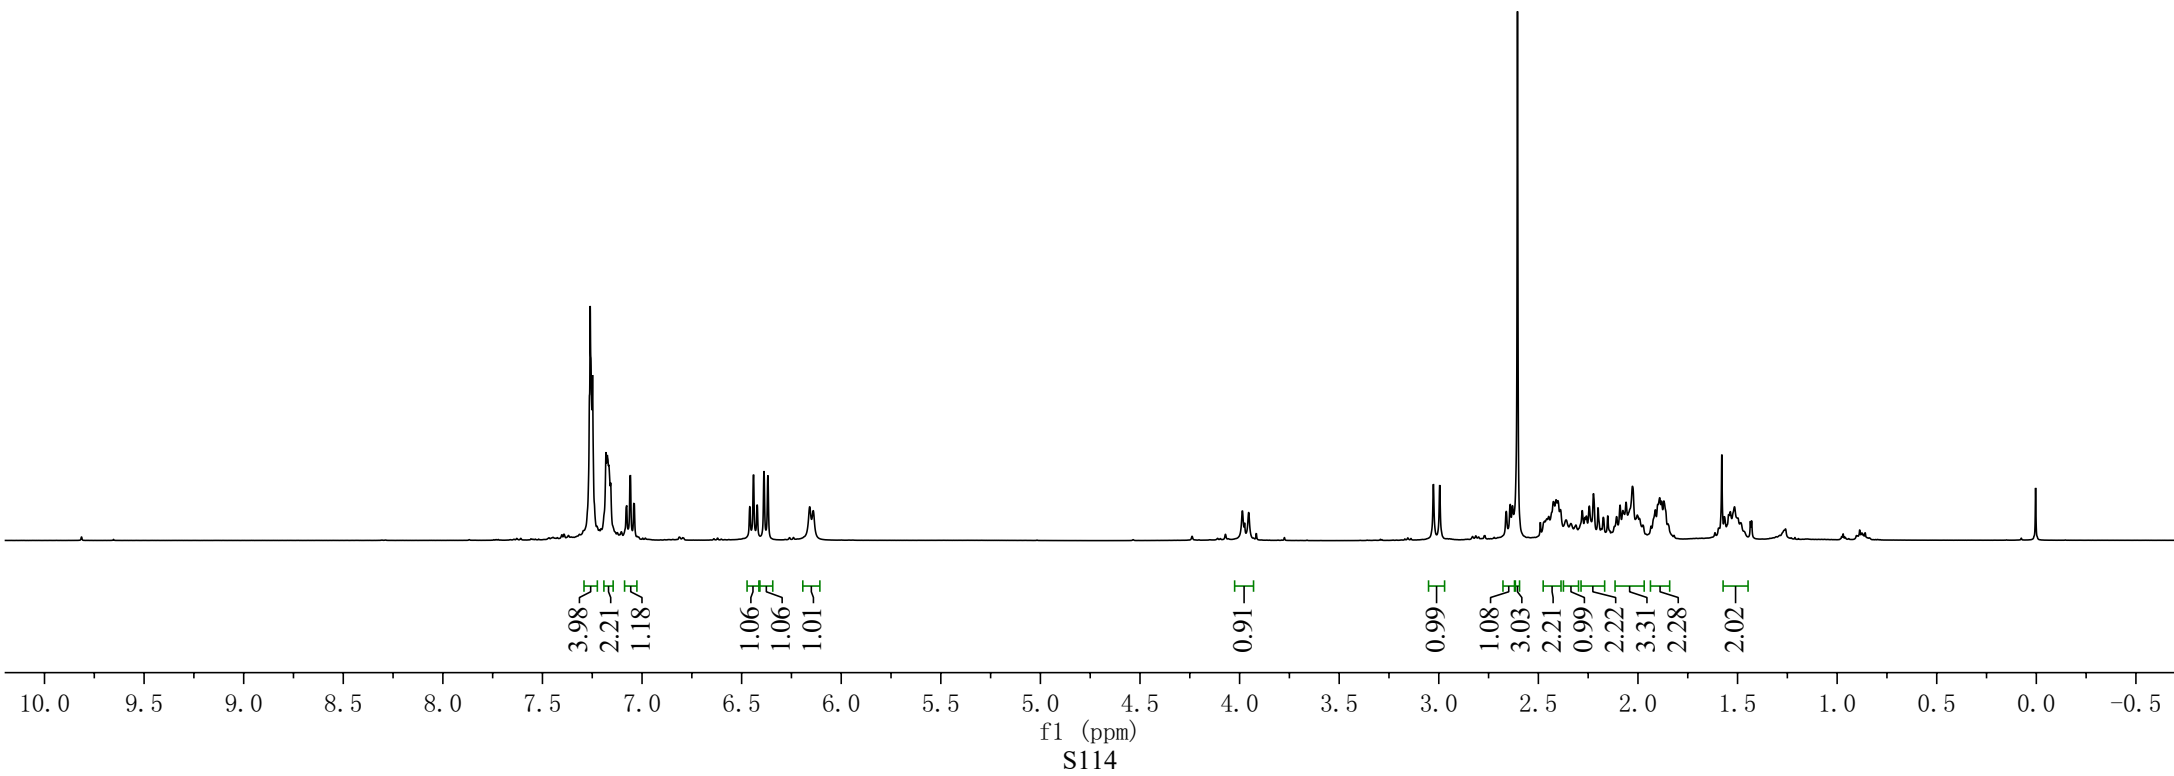

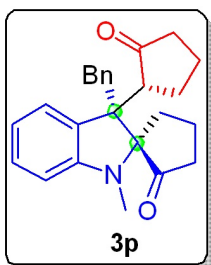

219.24  
217.56

151.03

137.47  
131.99  
131.89  
128.18  
127.81  
126.66  
124.95  
117.01

106.00

77.00 Chloroform-d

56.51  
54.49

40.21  
38.49  
38.34  
29.85  
28.92  
26.39  
19.85  
17.61

240 230 220 210 200 190 180 170 160 150 140 130 120 110 100 90 80 70 60 50 40 30 20 10 0

f1 (ppm)  
S115

7.160 Benzene-d6

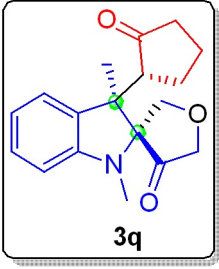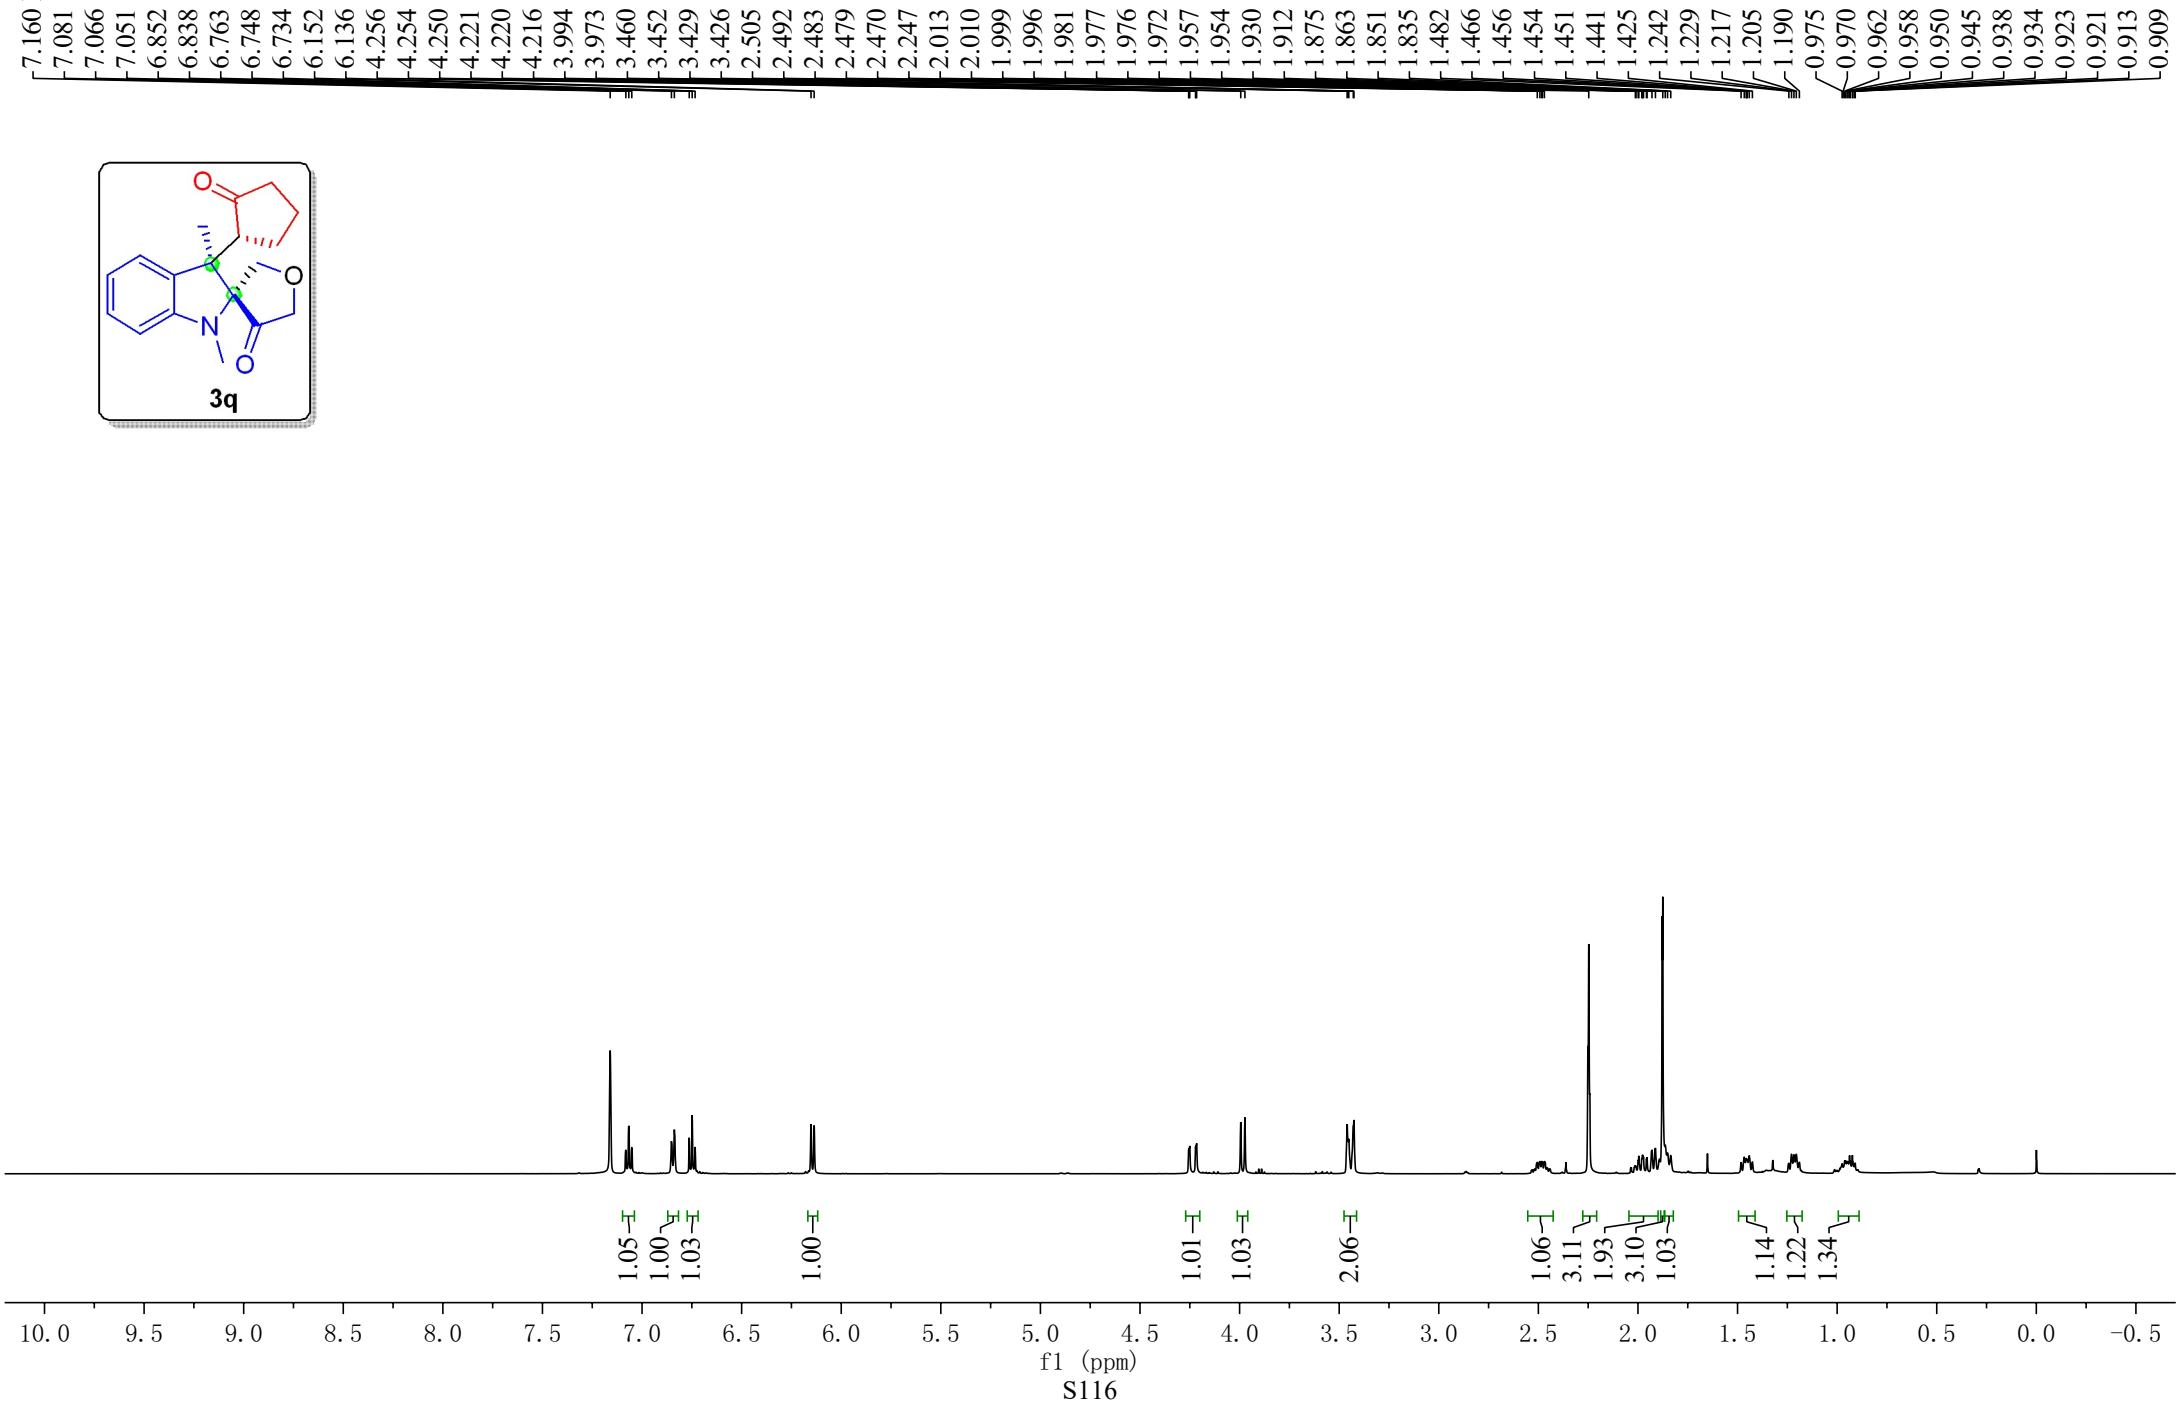



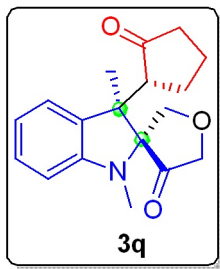

217.65  
216.28

150.27

134.88

128.47

128.06 Benzene-d6

122.32

118.79

105.65

80.21

72.40

68.07

60.91

52.07

39.46

29.52

26.52

20.01

19.85

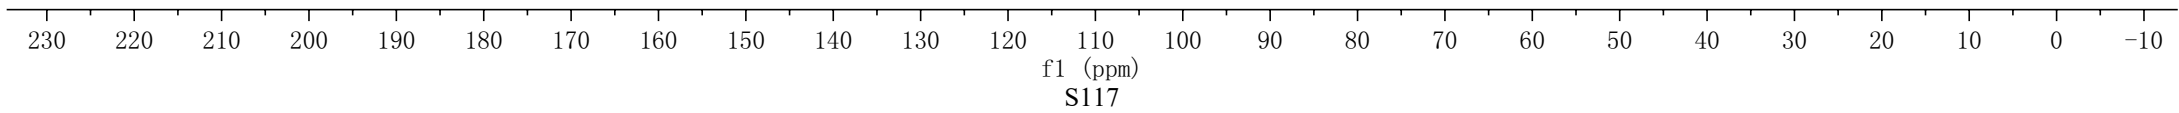

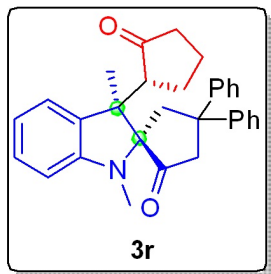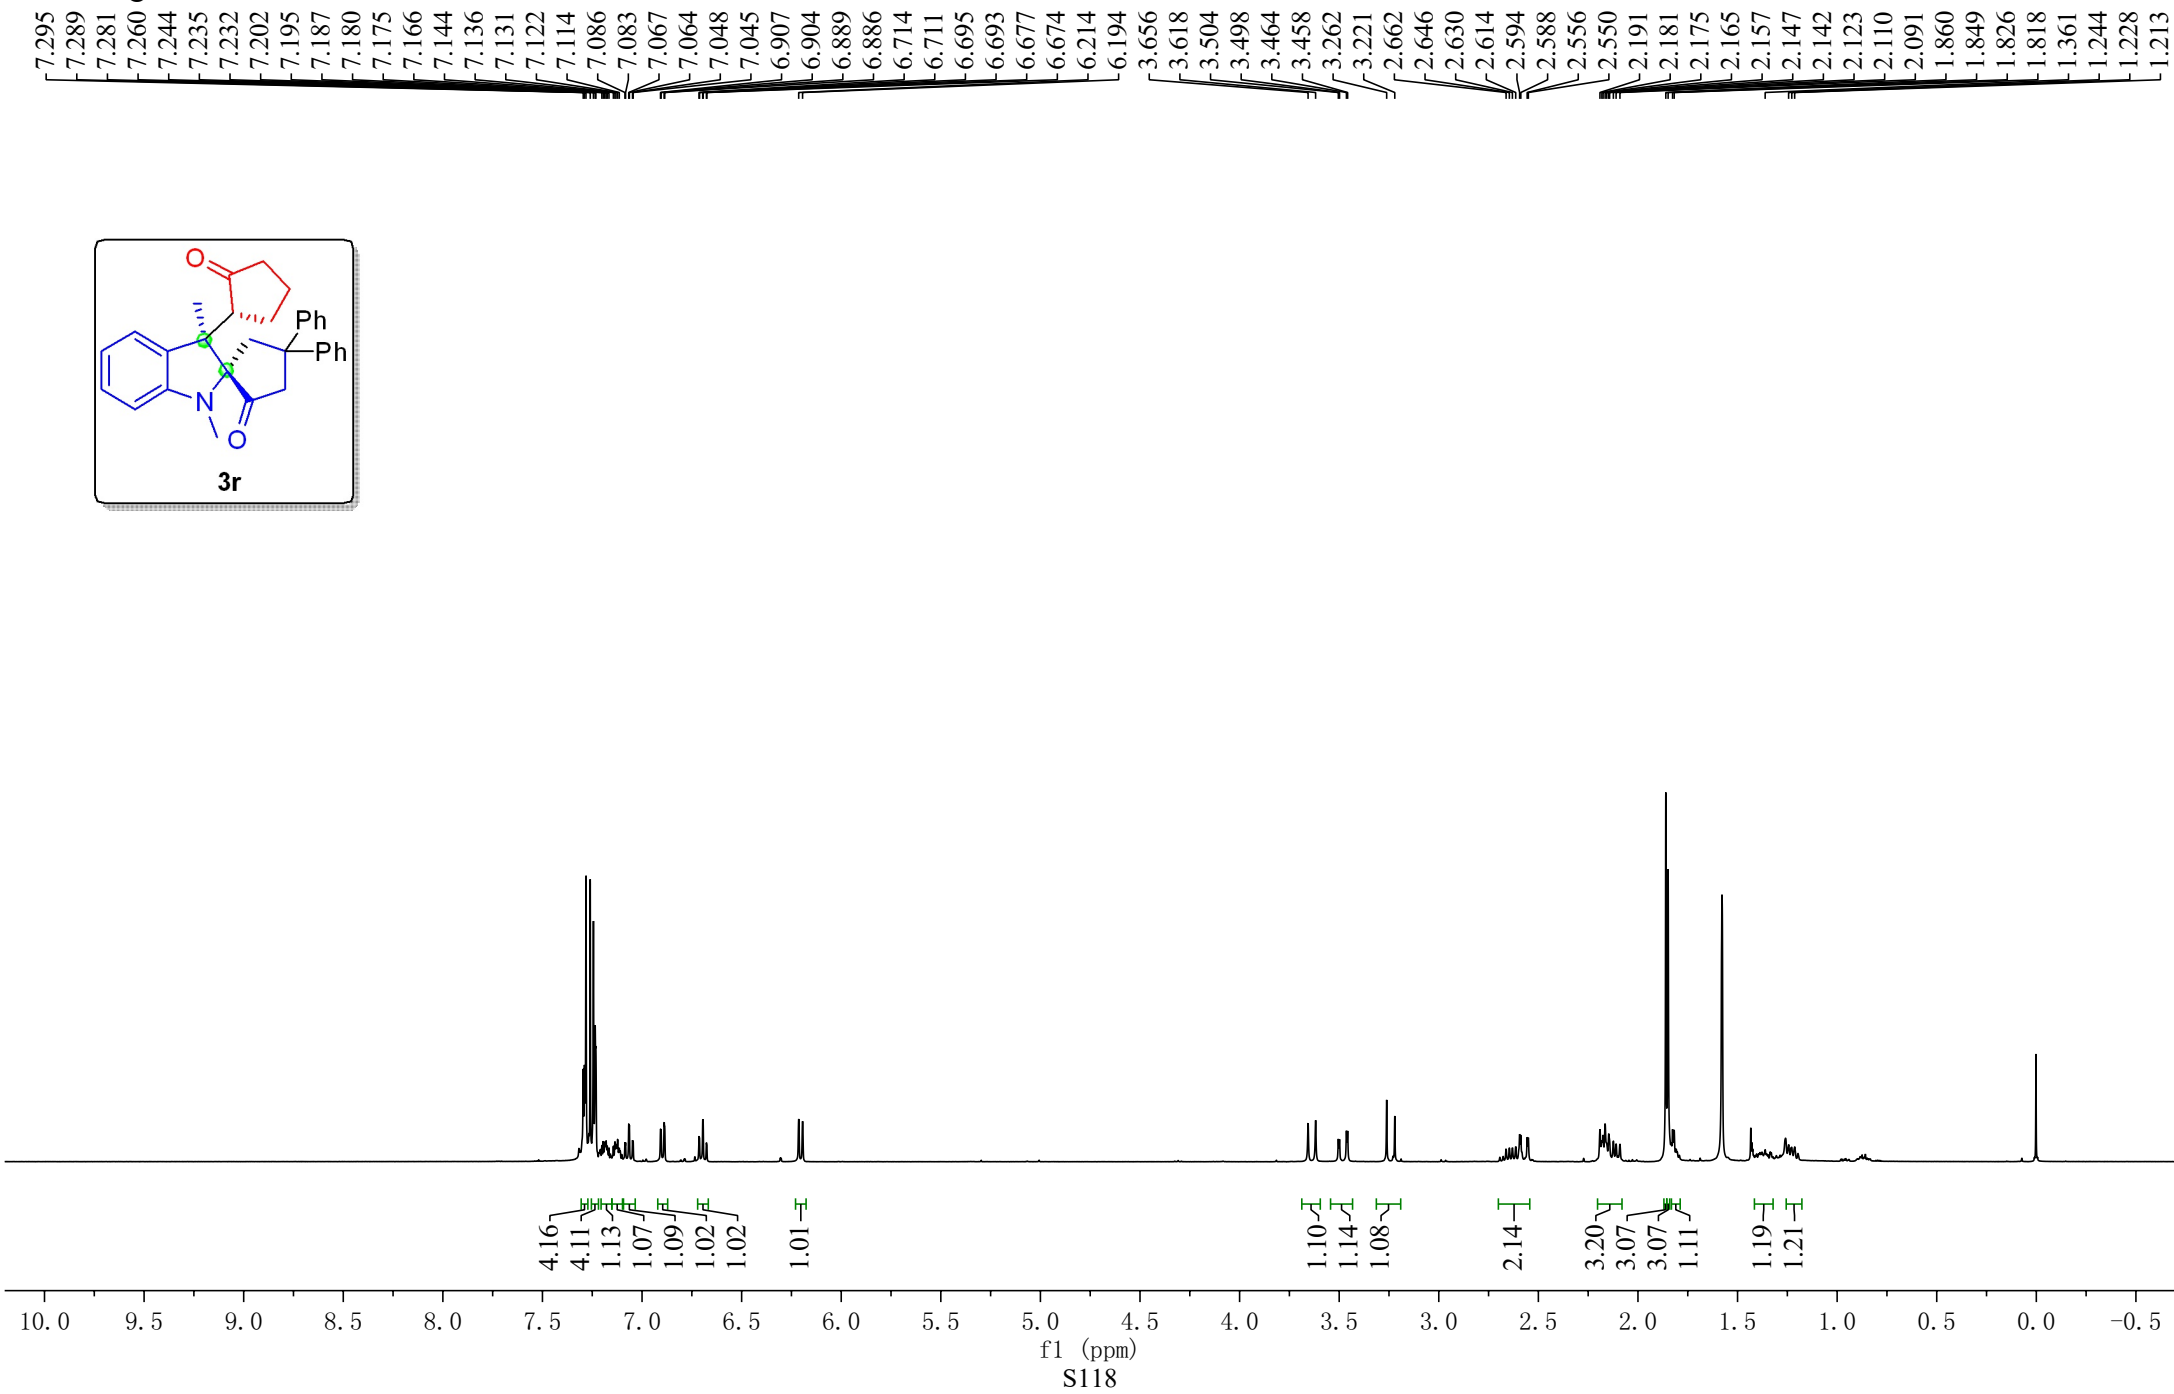

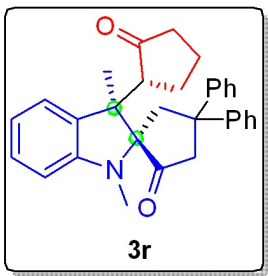

— 219.18  
— 215.92

— 150.12  
— 148.69  
— 147.62

— 128.61  
— 128.55  
— 128.20  
— 127.12  
— 126.48  
— 126.36  
— 126.26  
— 121.25  
— 117.89  
— 105.65

— 82.86

77.00 Chloroform-d

— 62.62

— 53.03  
— 51.73  
— 46.96  
— 41.44  
— 39.51

— 28.89  
— 26.33  
— 22.54  
— 20.04

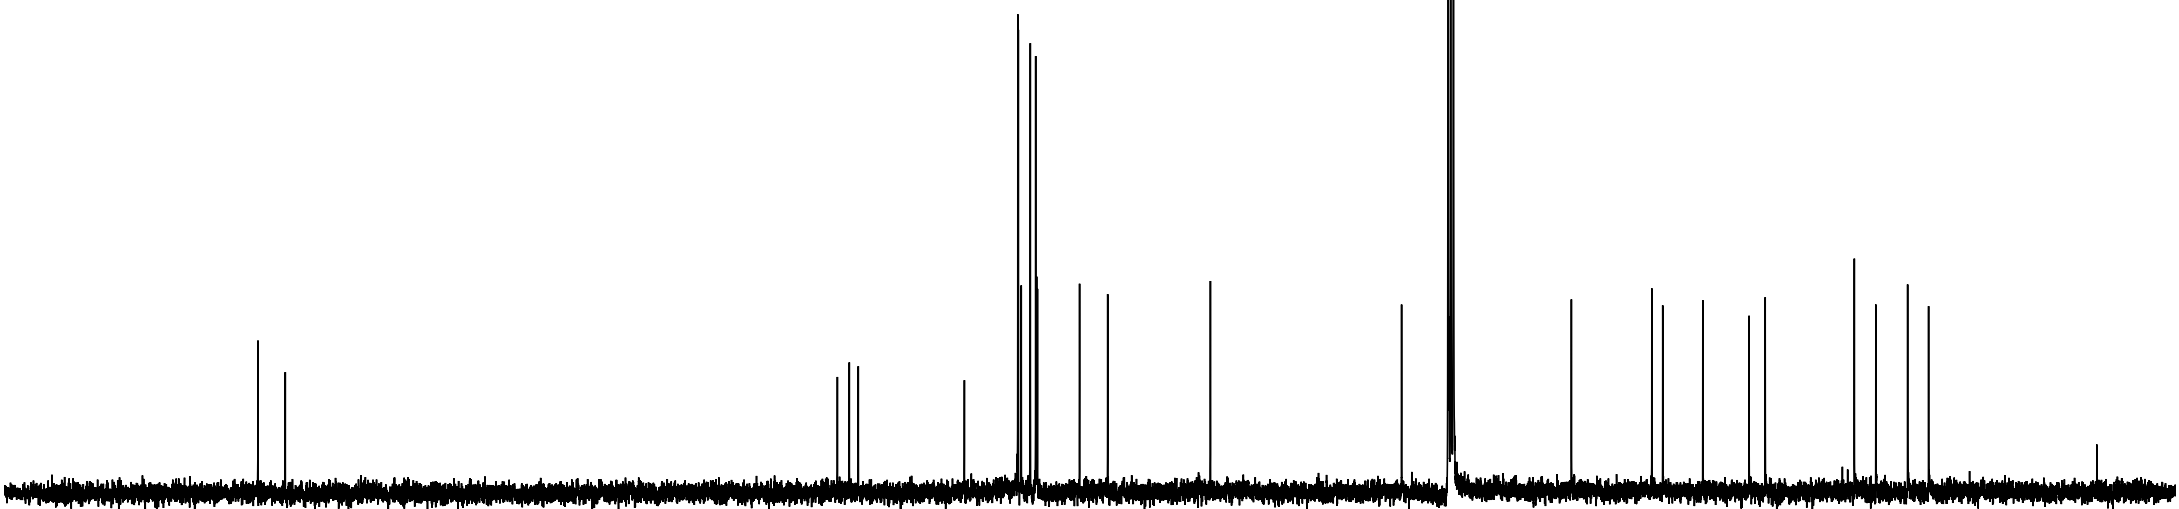

240 230 220 210 200 190 180 170 160 150 140 130 120 110 100 90 80 70 60 50 40 30 20 10 0

f1 (ppm)  
S119

7.260 Chloroform-d

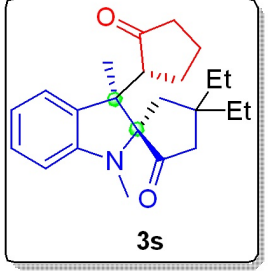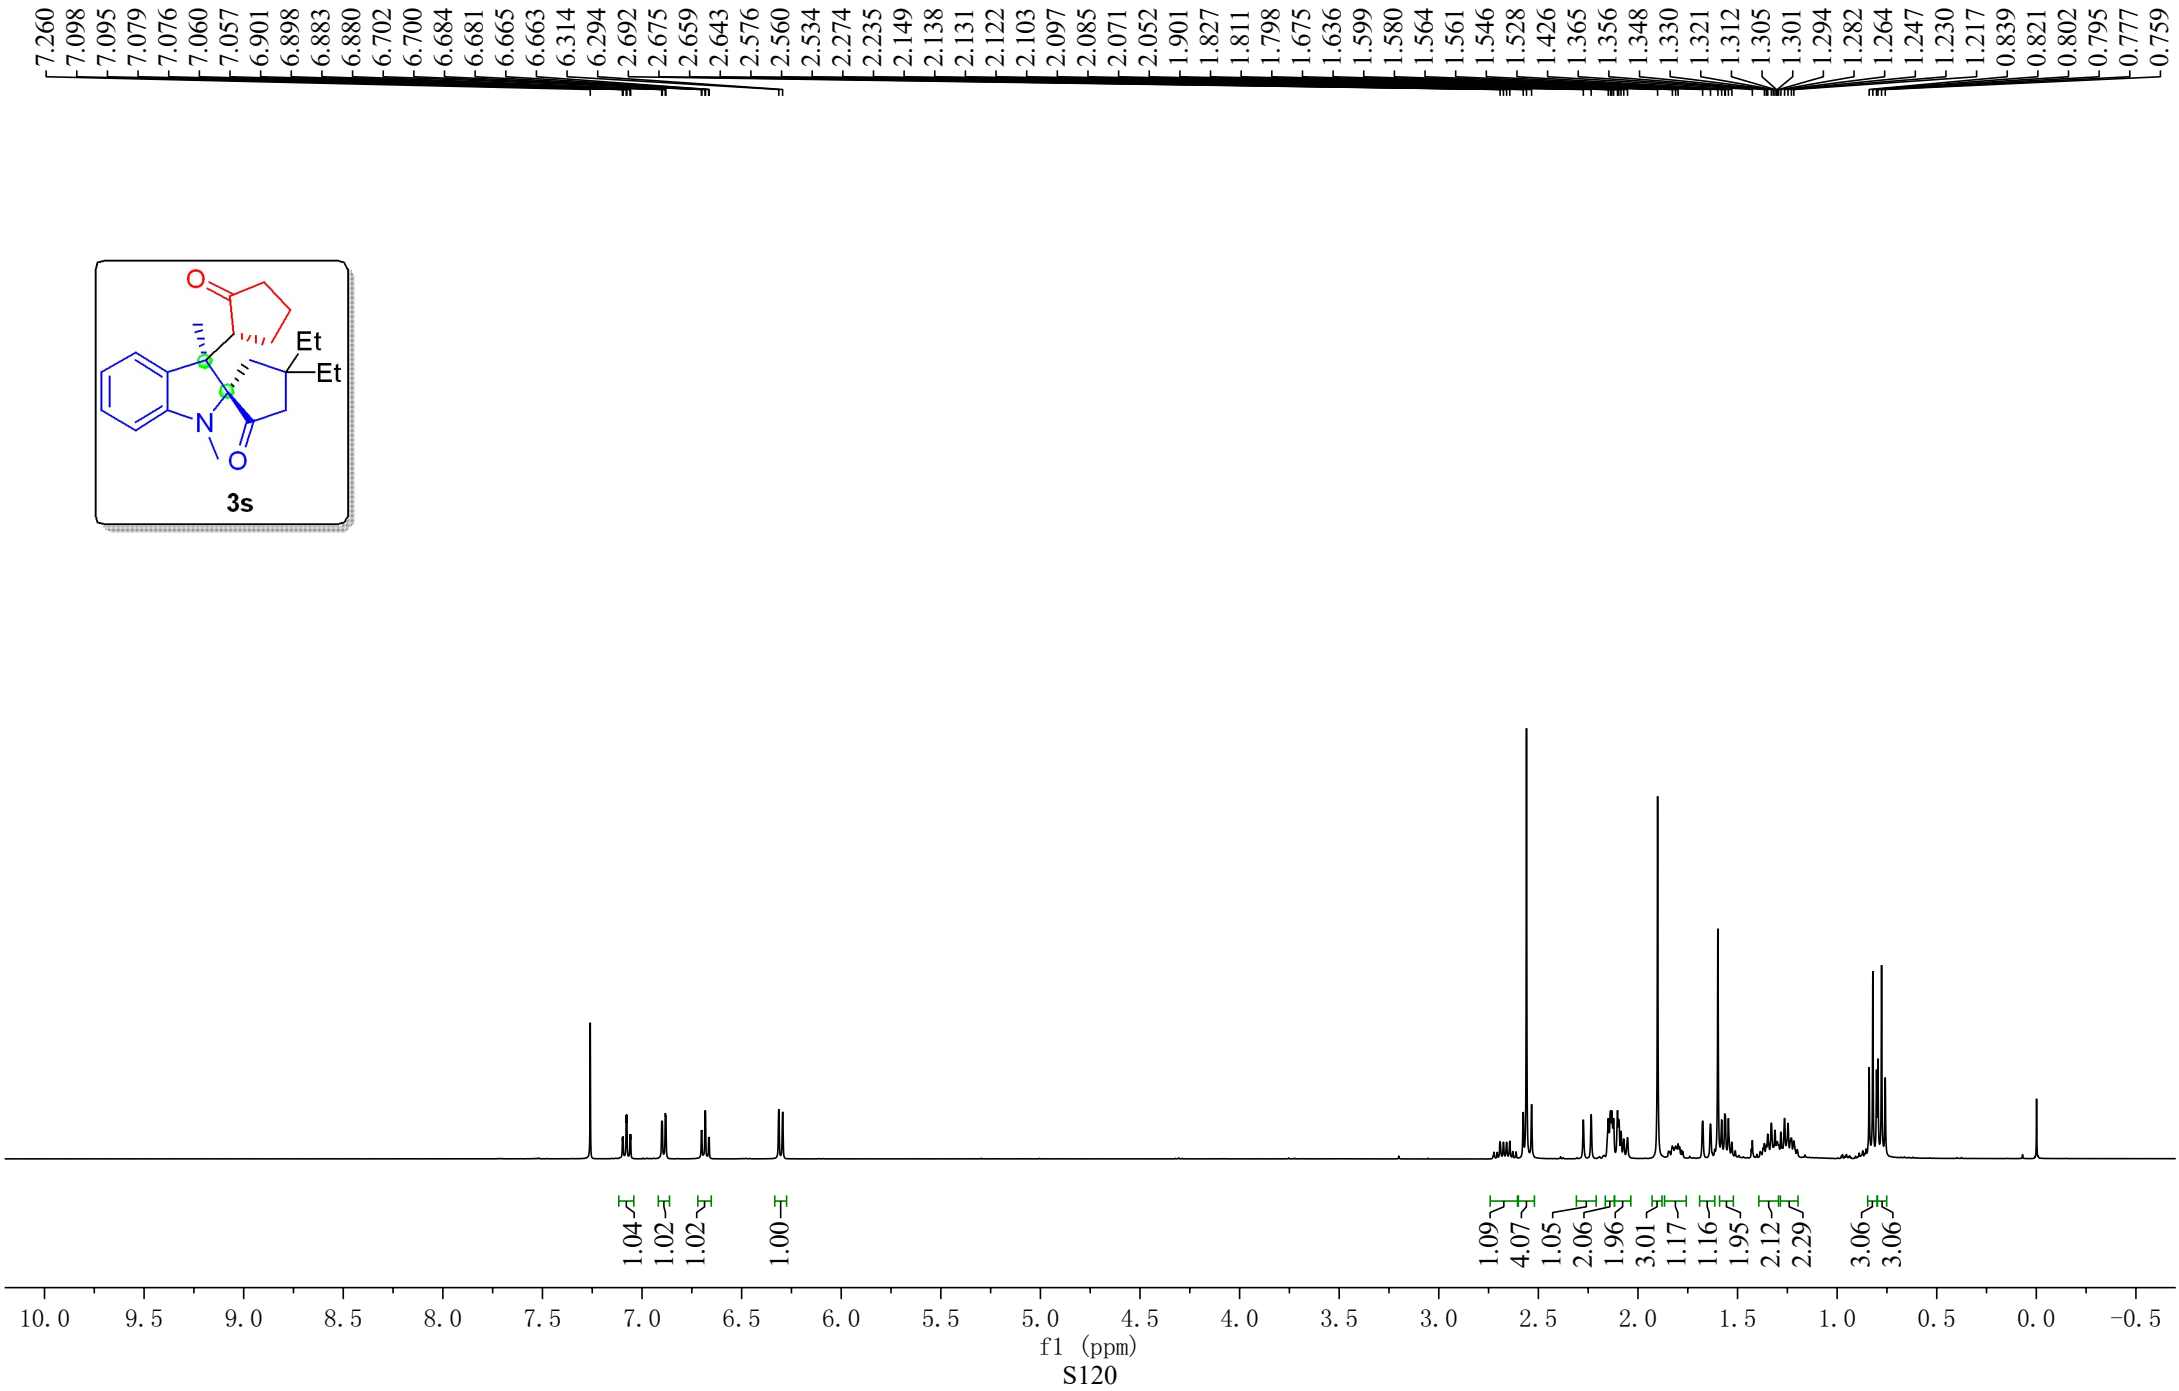

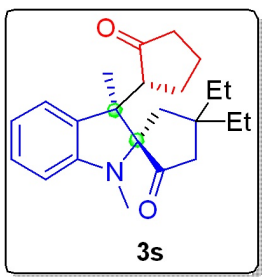

218.97  
217.73

150.25

134.97  
128.10  
121.32  
117.75

105.38

84.11

77.00 Chloroform-d

62.21

52.42  
51.42

39.68  
36.79  
35.74

30.96  
30.83  
29.11

26.38  
21.79  
20.11

8.51  
7.78

240 230 220 210 200 190 180 170 160 150 140 130 120 110 100 90 80 70 60 50 40 30 20 10 0

f1 (ppm)  
S121

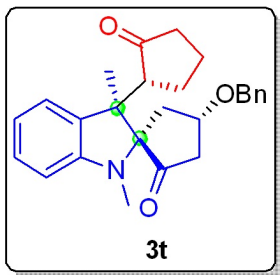

7.384  
7.361  
7.350  
7.320  
7.310  
7.297  
7.285  
7.254  
7.250  
7.185  
7.167  
7.101  
7.082  
7.063

6.740  
6.722  
6.374  
6.295

4.548  
4.304  
4.285  
4.266  
4.247  
4.229

2.694  
2.675  
2.649  
2.633  
2.612  
2.595  
2.540  
2.425  
2.407  
2.386  
2.368  
2.349  
2.234  
2.213  
2.128  
2.104  
2.082  
1.901  
1.879  
1.692  
1.522  
1.510  
1.498  
1.482  
1.475 TMS  
0.000 TMS

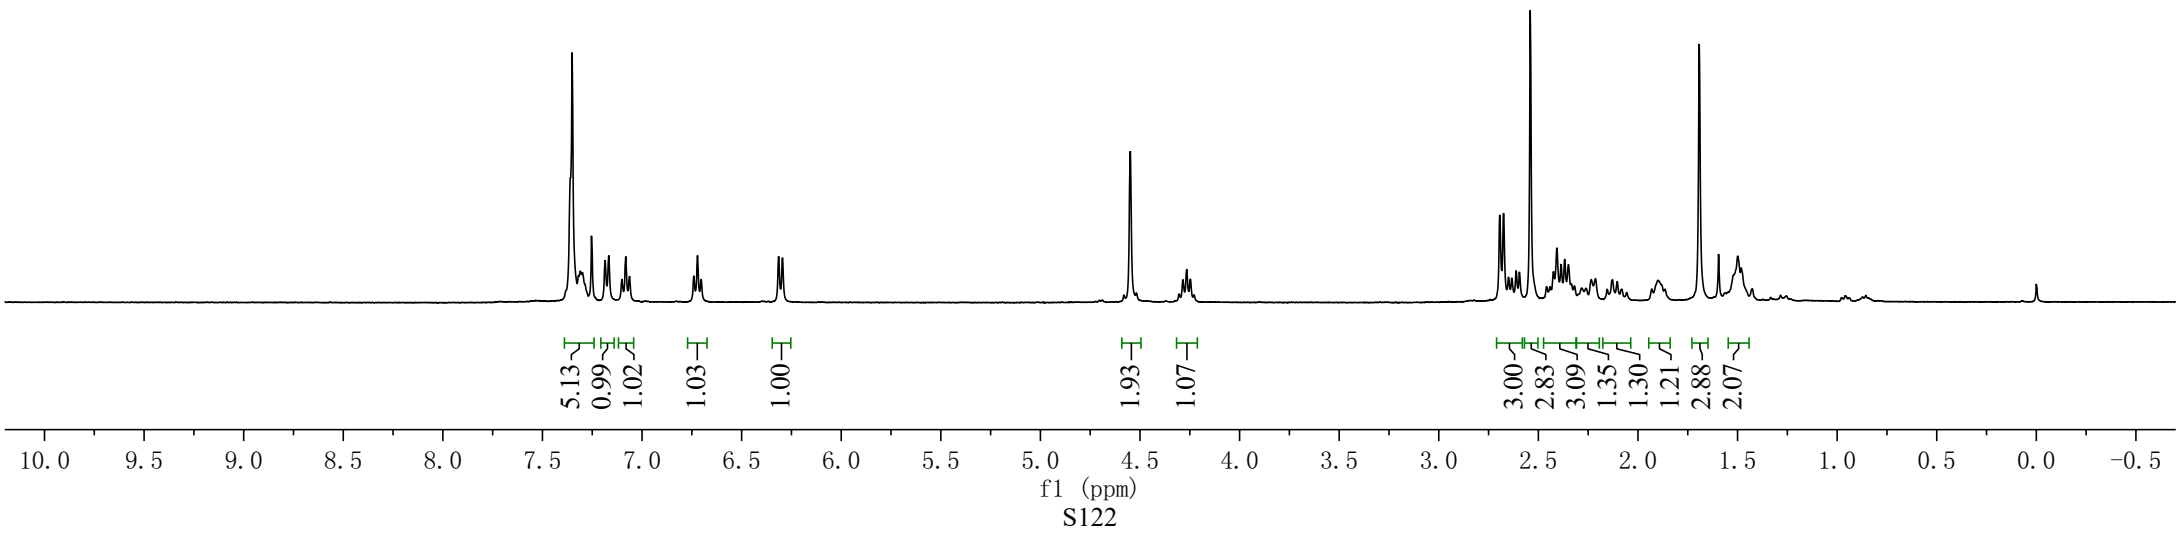

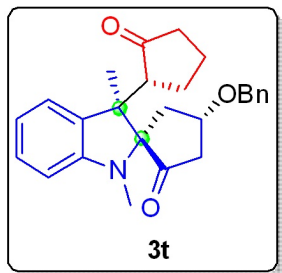

~218.63  
~216.13

—149.24

~137.78

~136.04

~128.47

~127.89

~127.78

~127.63

~122.58

~118.54

—105.79

~83.20

~77.00 Chloroform-d

~72.33

~70.99

—59.91

—51.25

—46.97

~39.32

~35.60

~30.04

~26.91

~21.70

~20.18

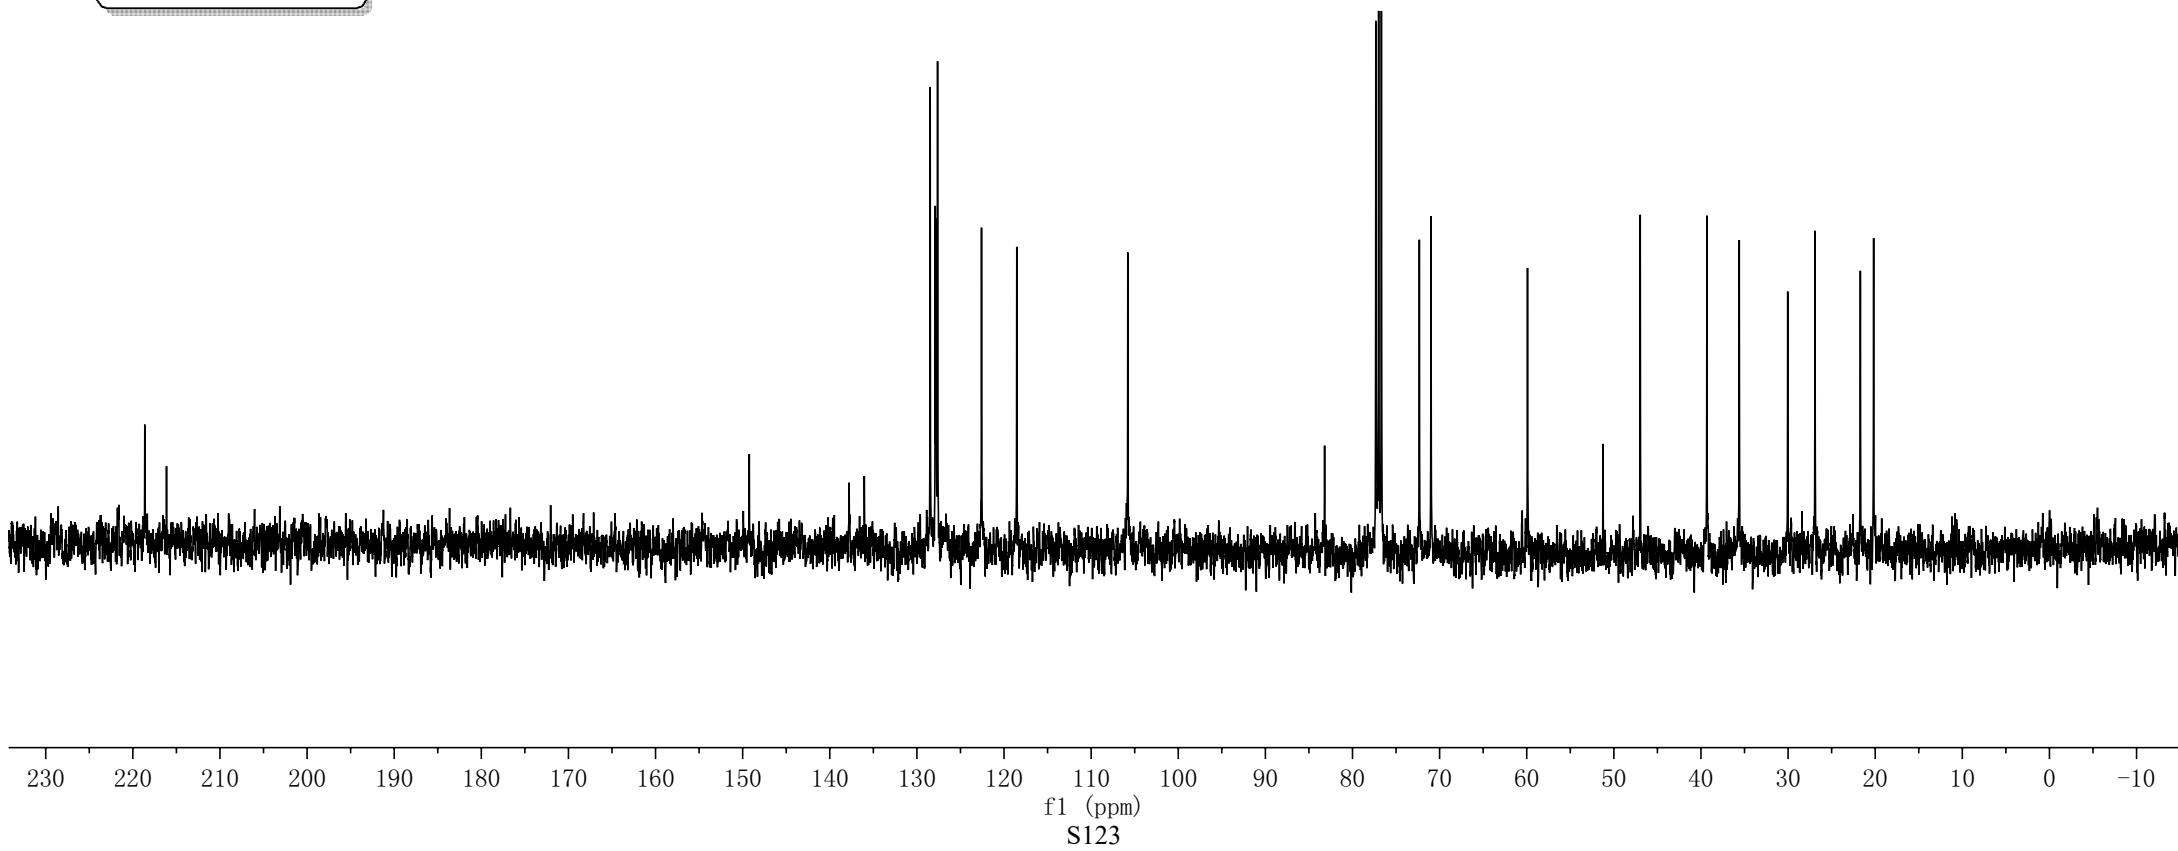

7.260 Chloroform-d

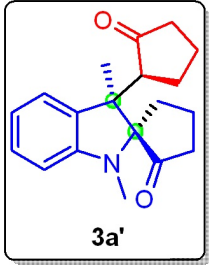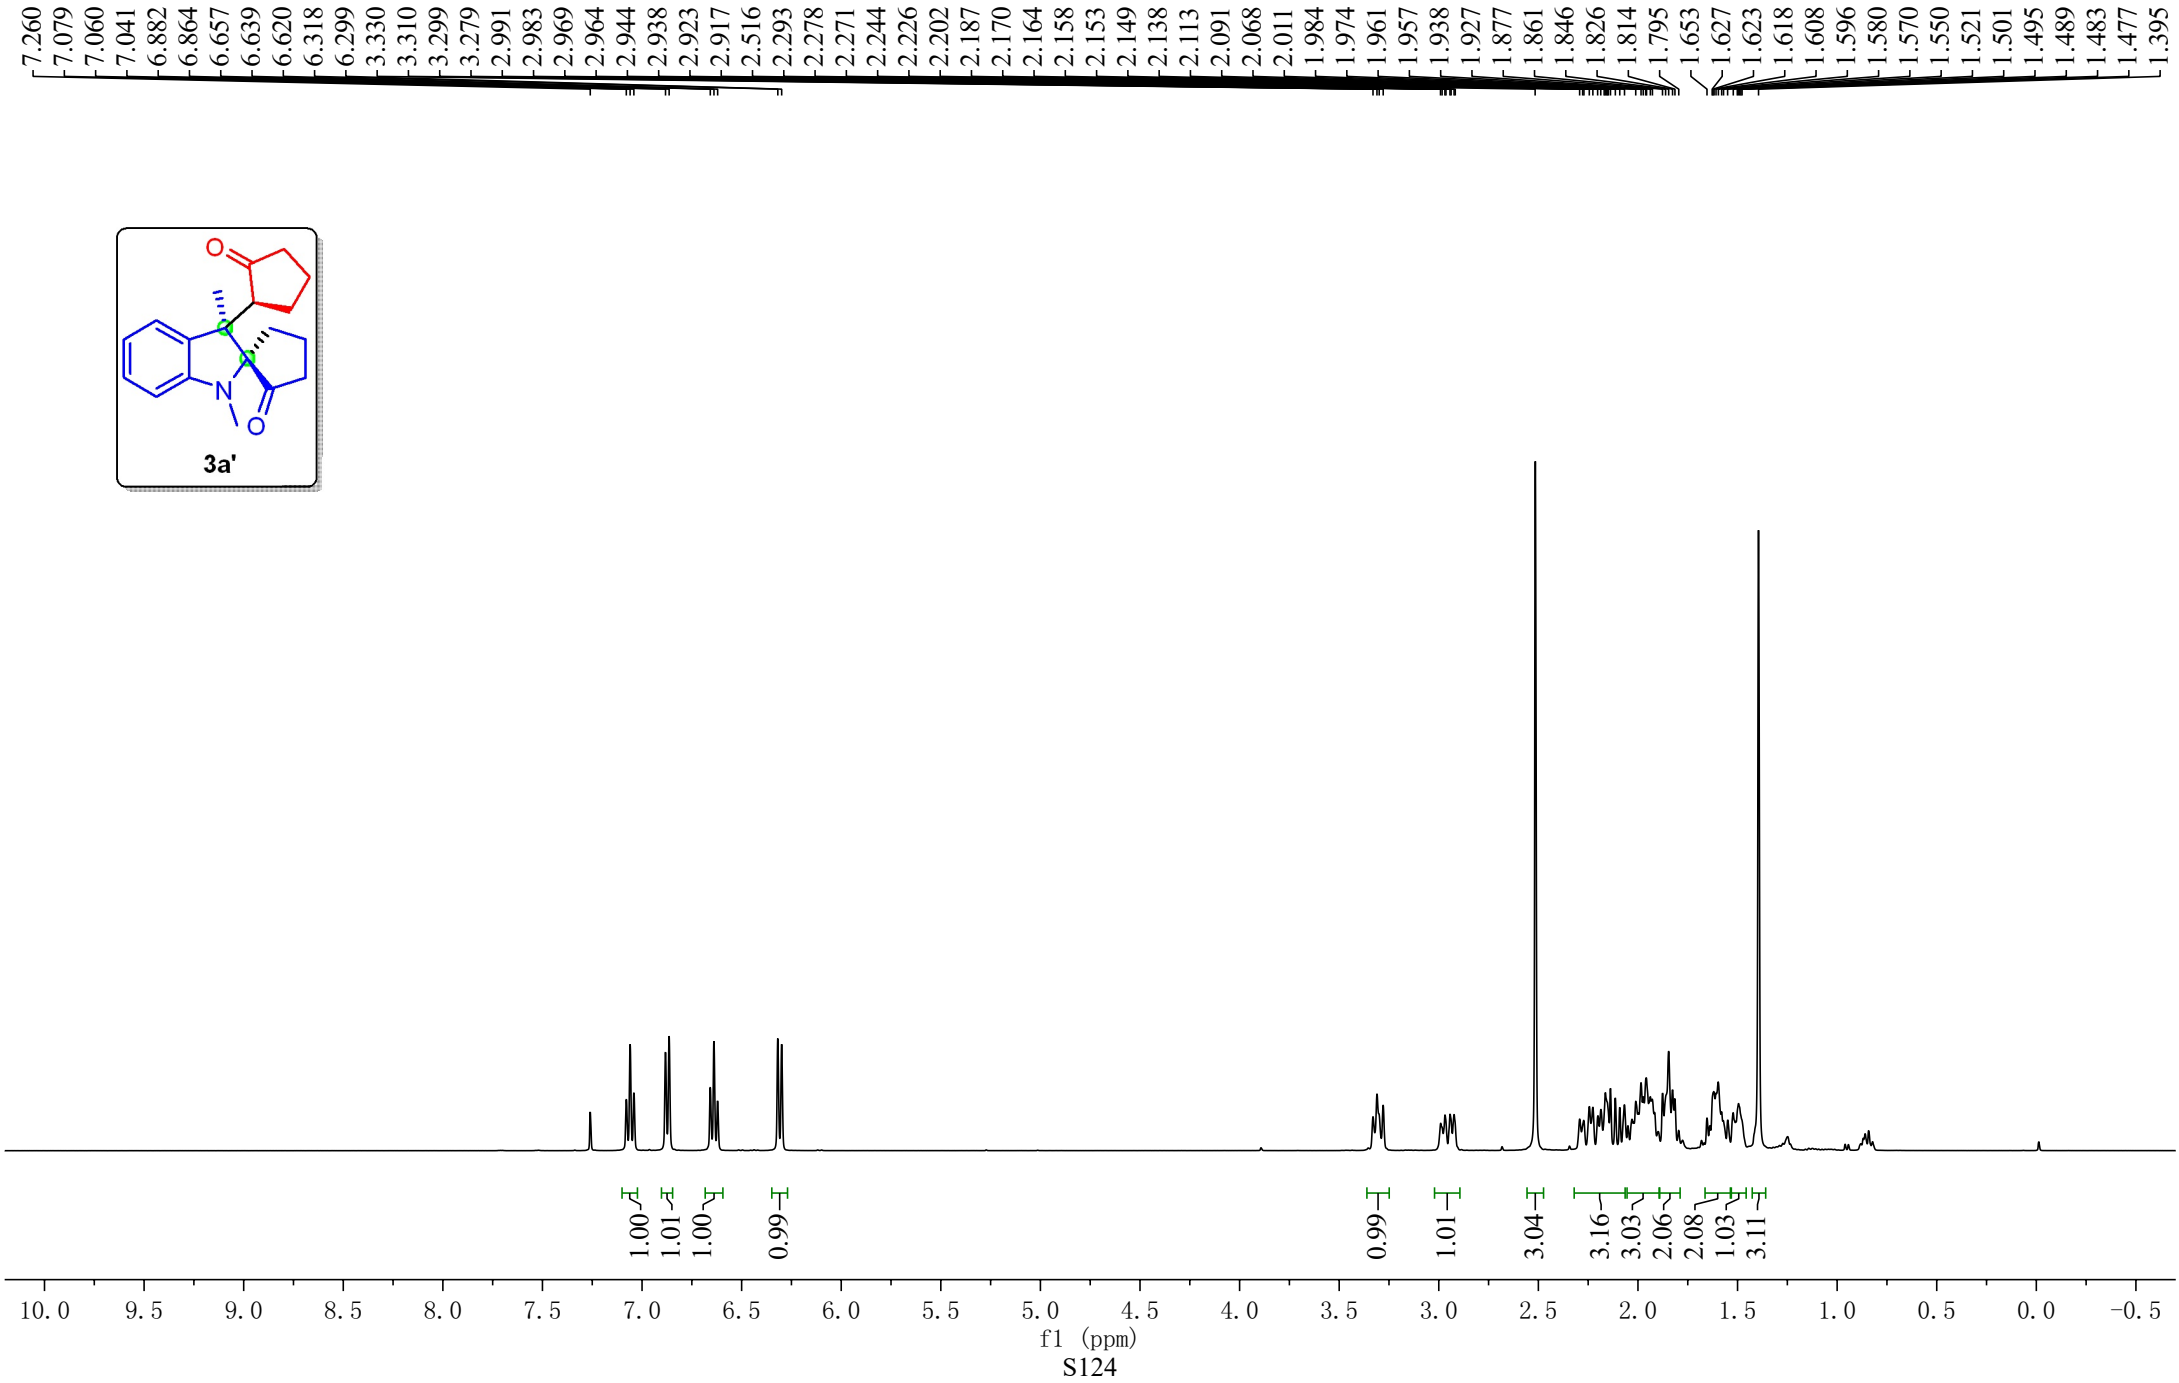



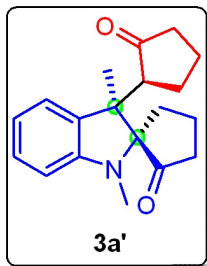

~219.77  
~218.28

—150.14

~133.09  
~127.94  
—123.15  
~117.15

—105.58

—84.06

—77.00 Chloroform-d

~50.97  
~49.89

~39.34  
~37.42

~29.78  
~27.85

~24.57  
~19.43

~17.43  
~13.76

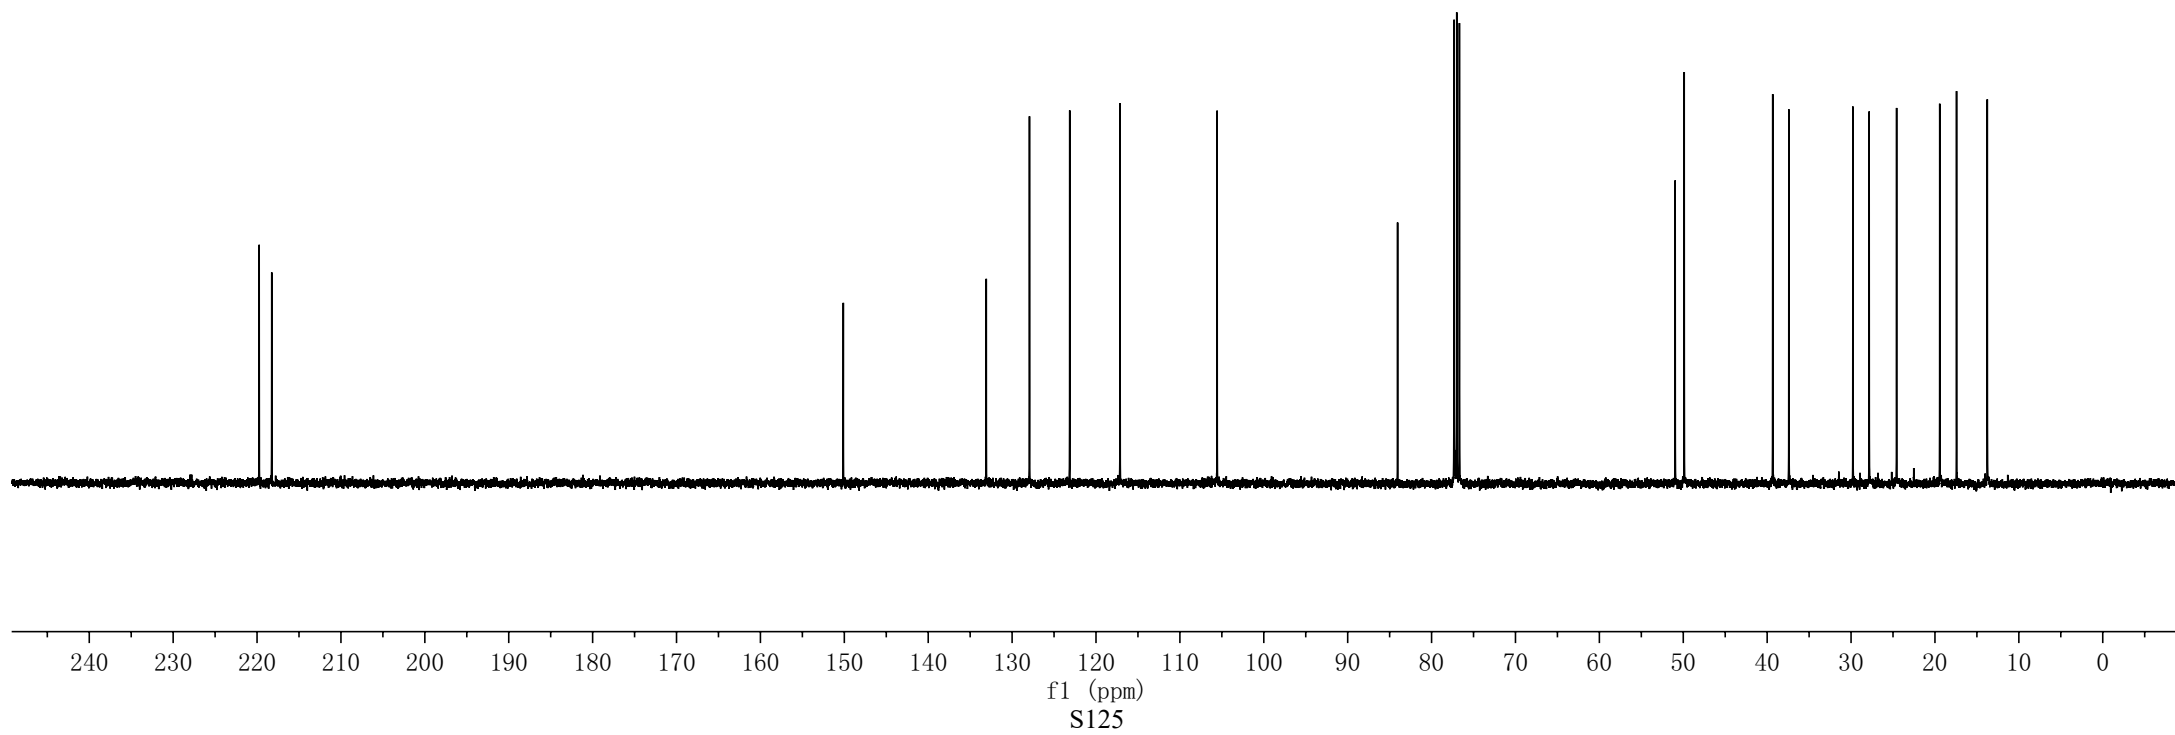

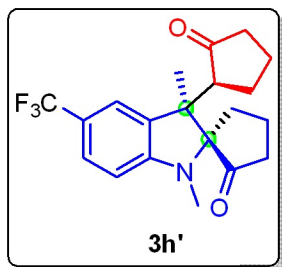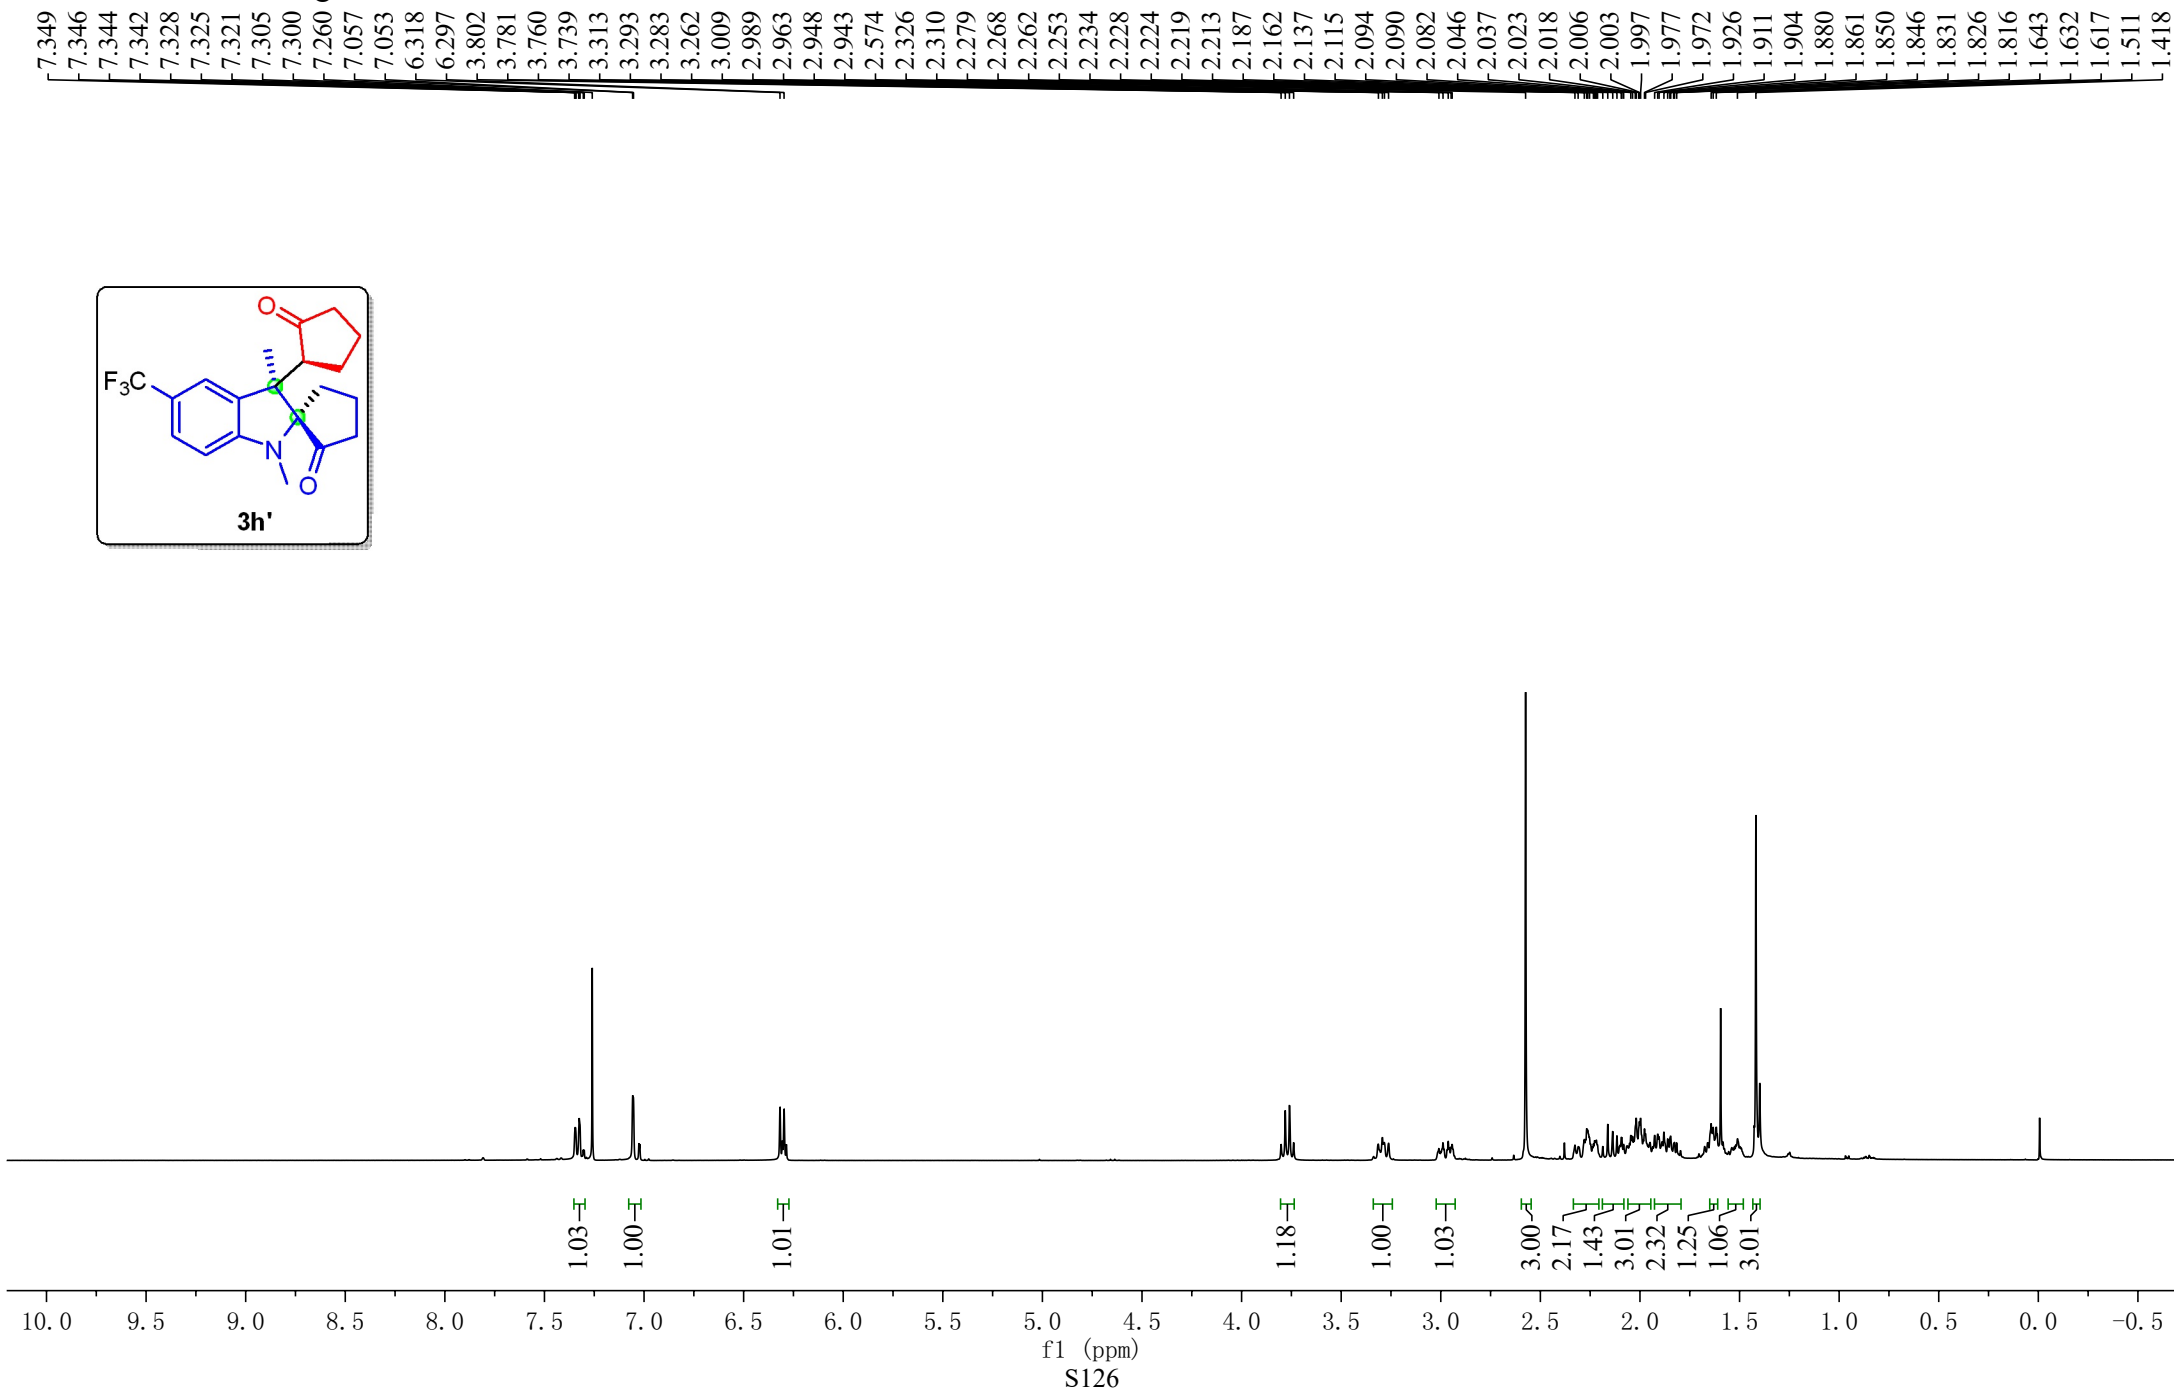

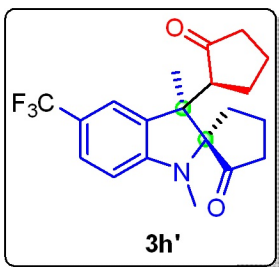

219.58  
217.54

152.61  
133.54  
126.42  
126.24  
126.20  
126.16  
126.12  
120.26  
120.23  
120.19  
120.15  
119.10  
108.78  
104.58

84.14

77.00 Chloroform-d

50.80  
49.89

39.41  
37.49

29.60  
27.71

25.62  
19.50

17.63  
13.86

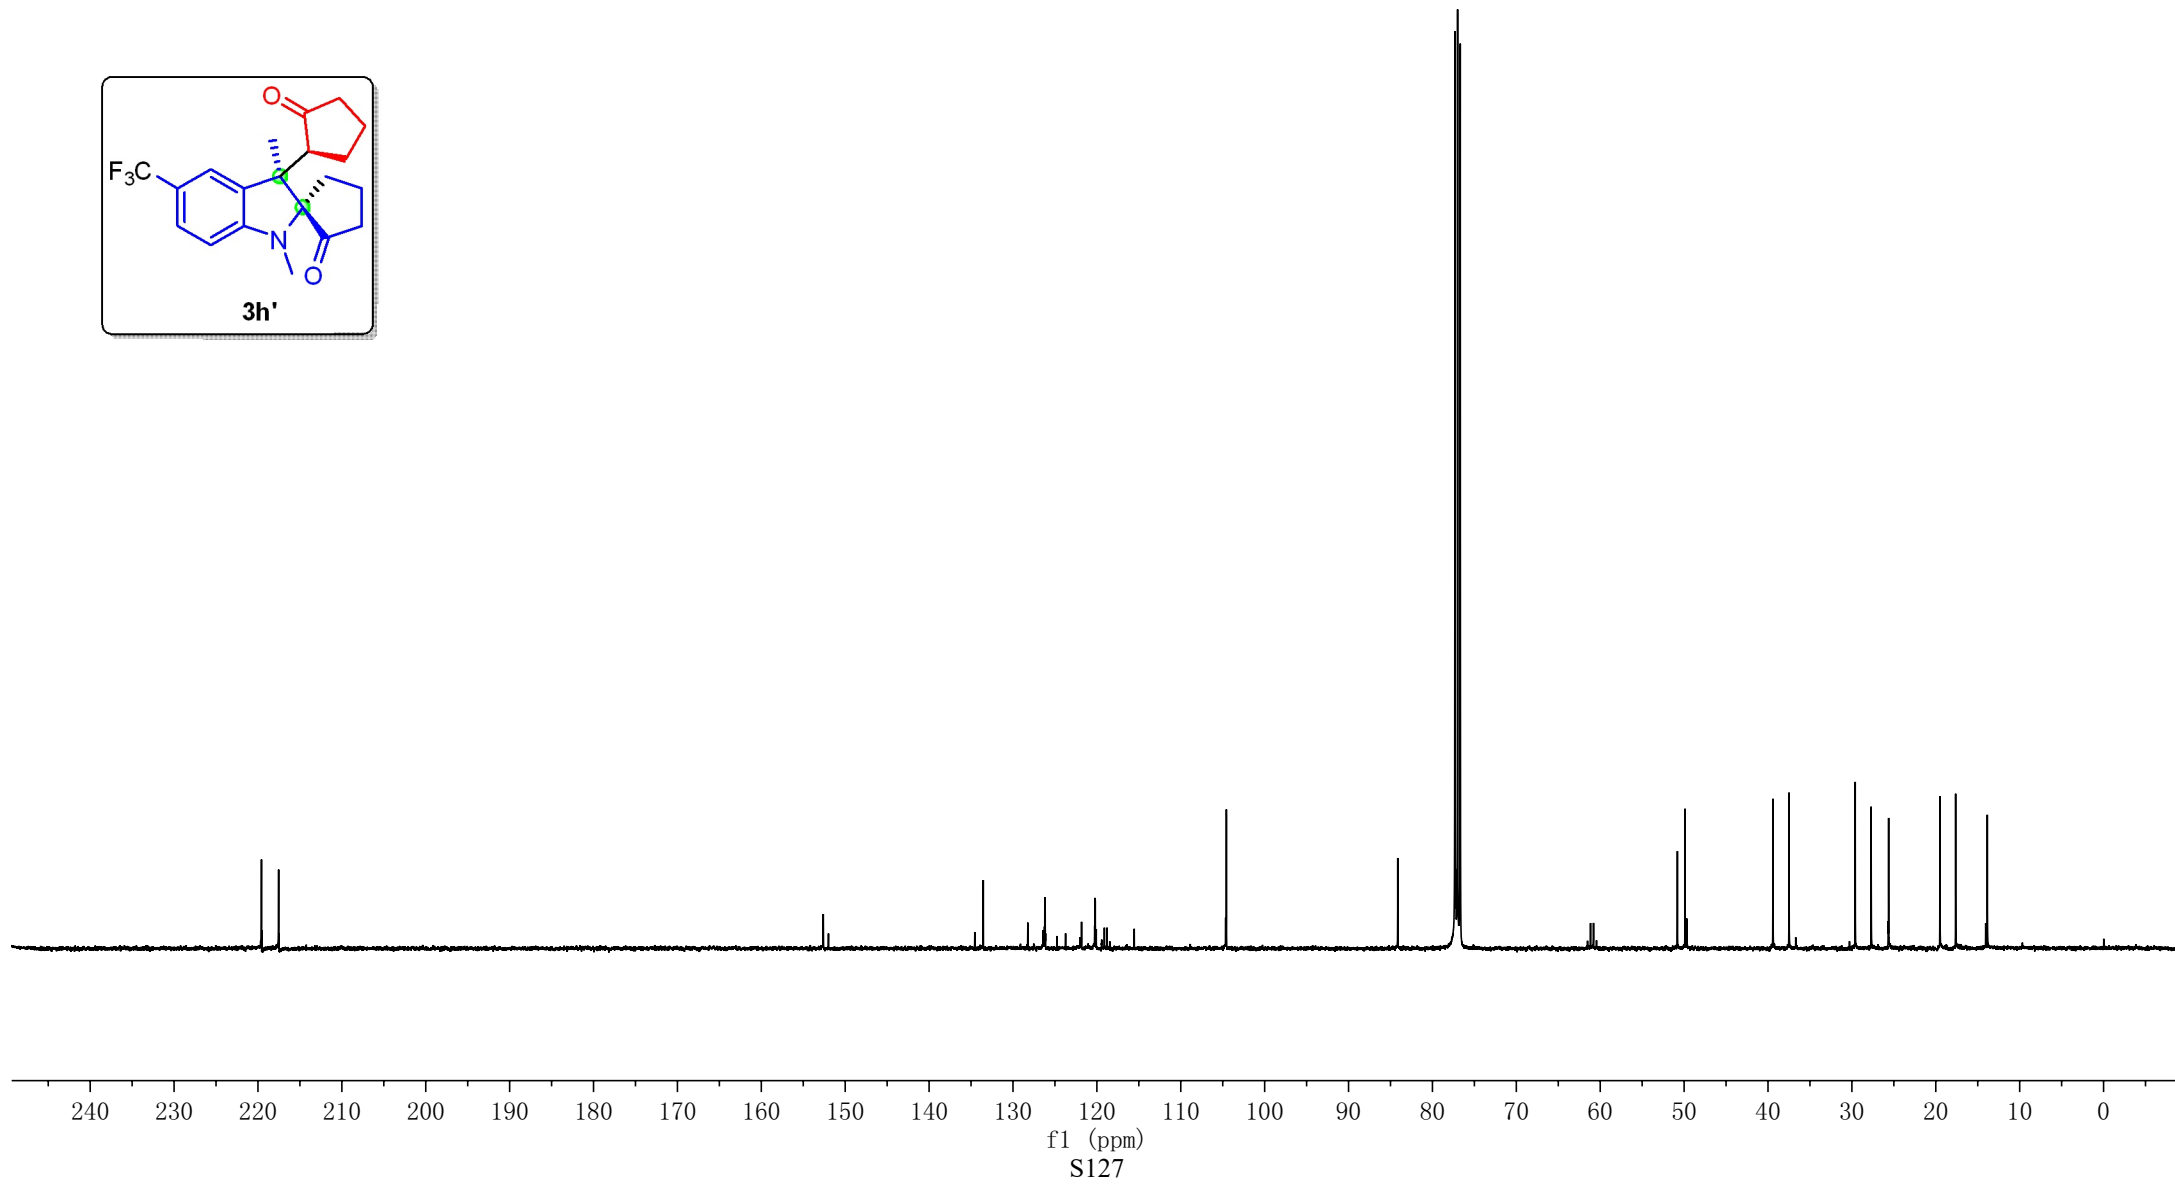



—-62.645

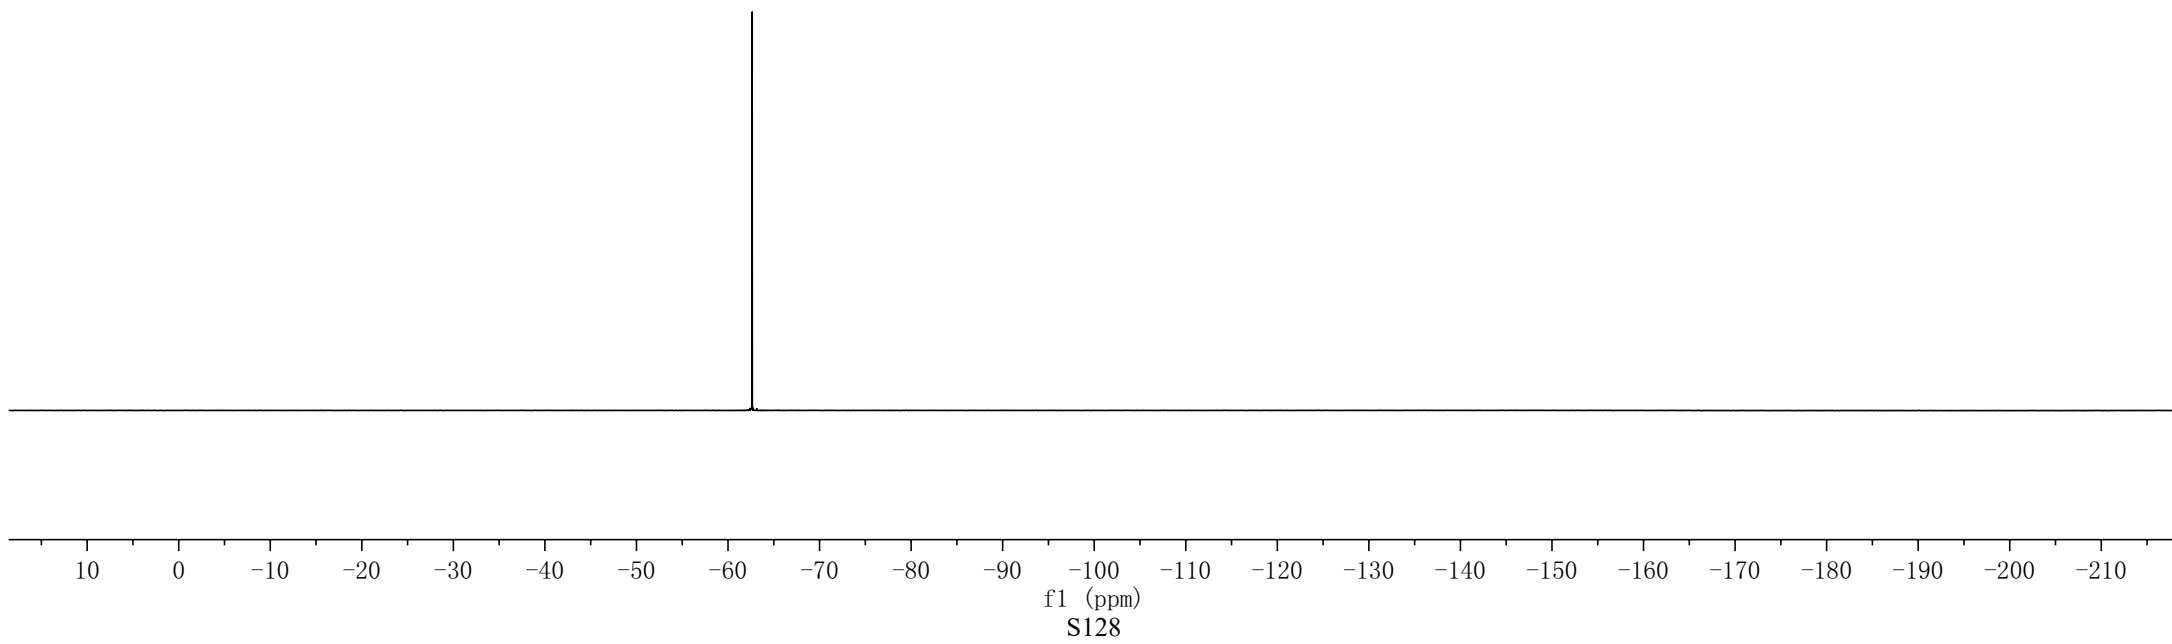

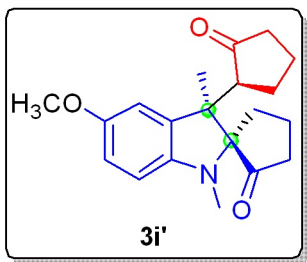

—7.160 Benzene-d6

6.642  
6.628  
6.624

6.138  
6.120

3.578  
3.561  
3.552  
3.535  
3.476

3.058  
3.040  
3.035  
3.020  
3.001  
2.903

1.861  
1.824  
1.817  
1.803  
1.796  
1.486  
1.480  
1.470  
1.462  
1.449  
1.443  
1.219  
1.200  
1.189  
1.182  
1.177  
1.173  
1.166

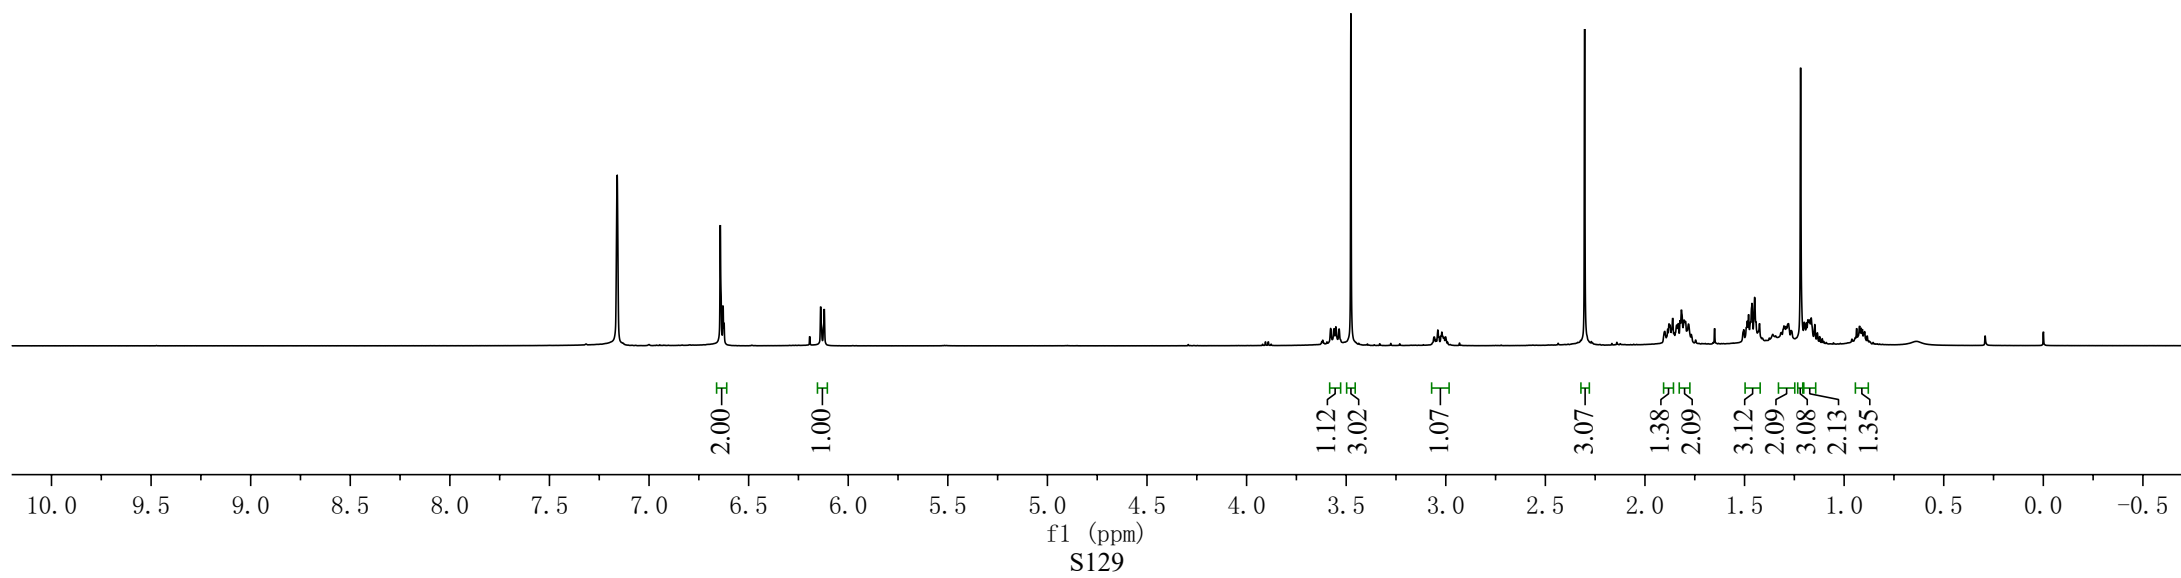

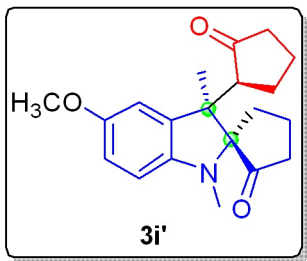

~218.28  
~215.82

—153.34

—145.29

—135.81

128.06 Benzene-d6

~112.60  
~111.67  
—105.45

—84.39

~55.71  
~51.11  
~49.97

~39.19  
~37.49

~30.25  
~28.14  
~24.48  
~19.58  
~17.78  
~14.06

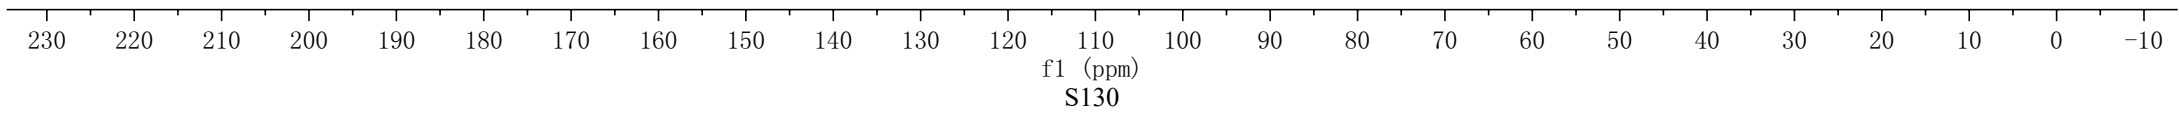

7.260 Chloroform-d

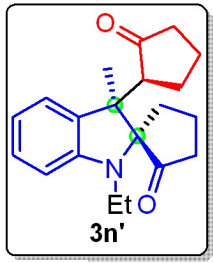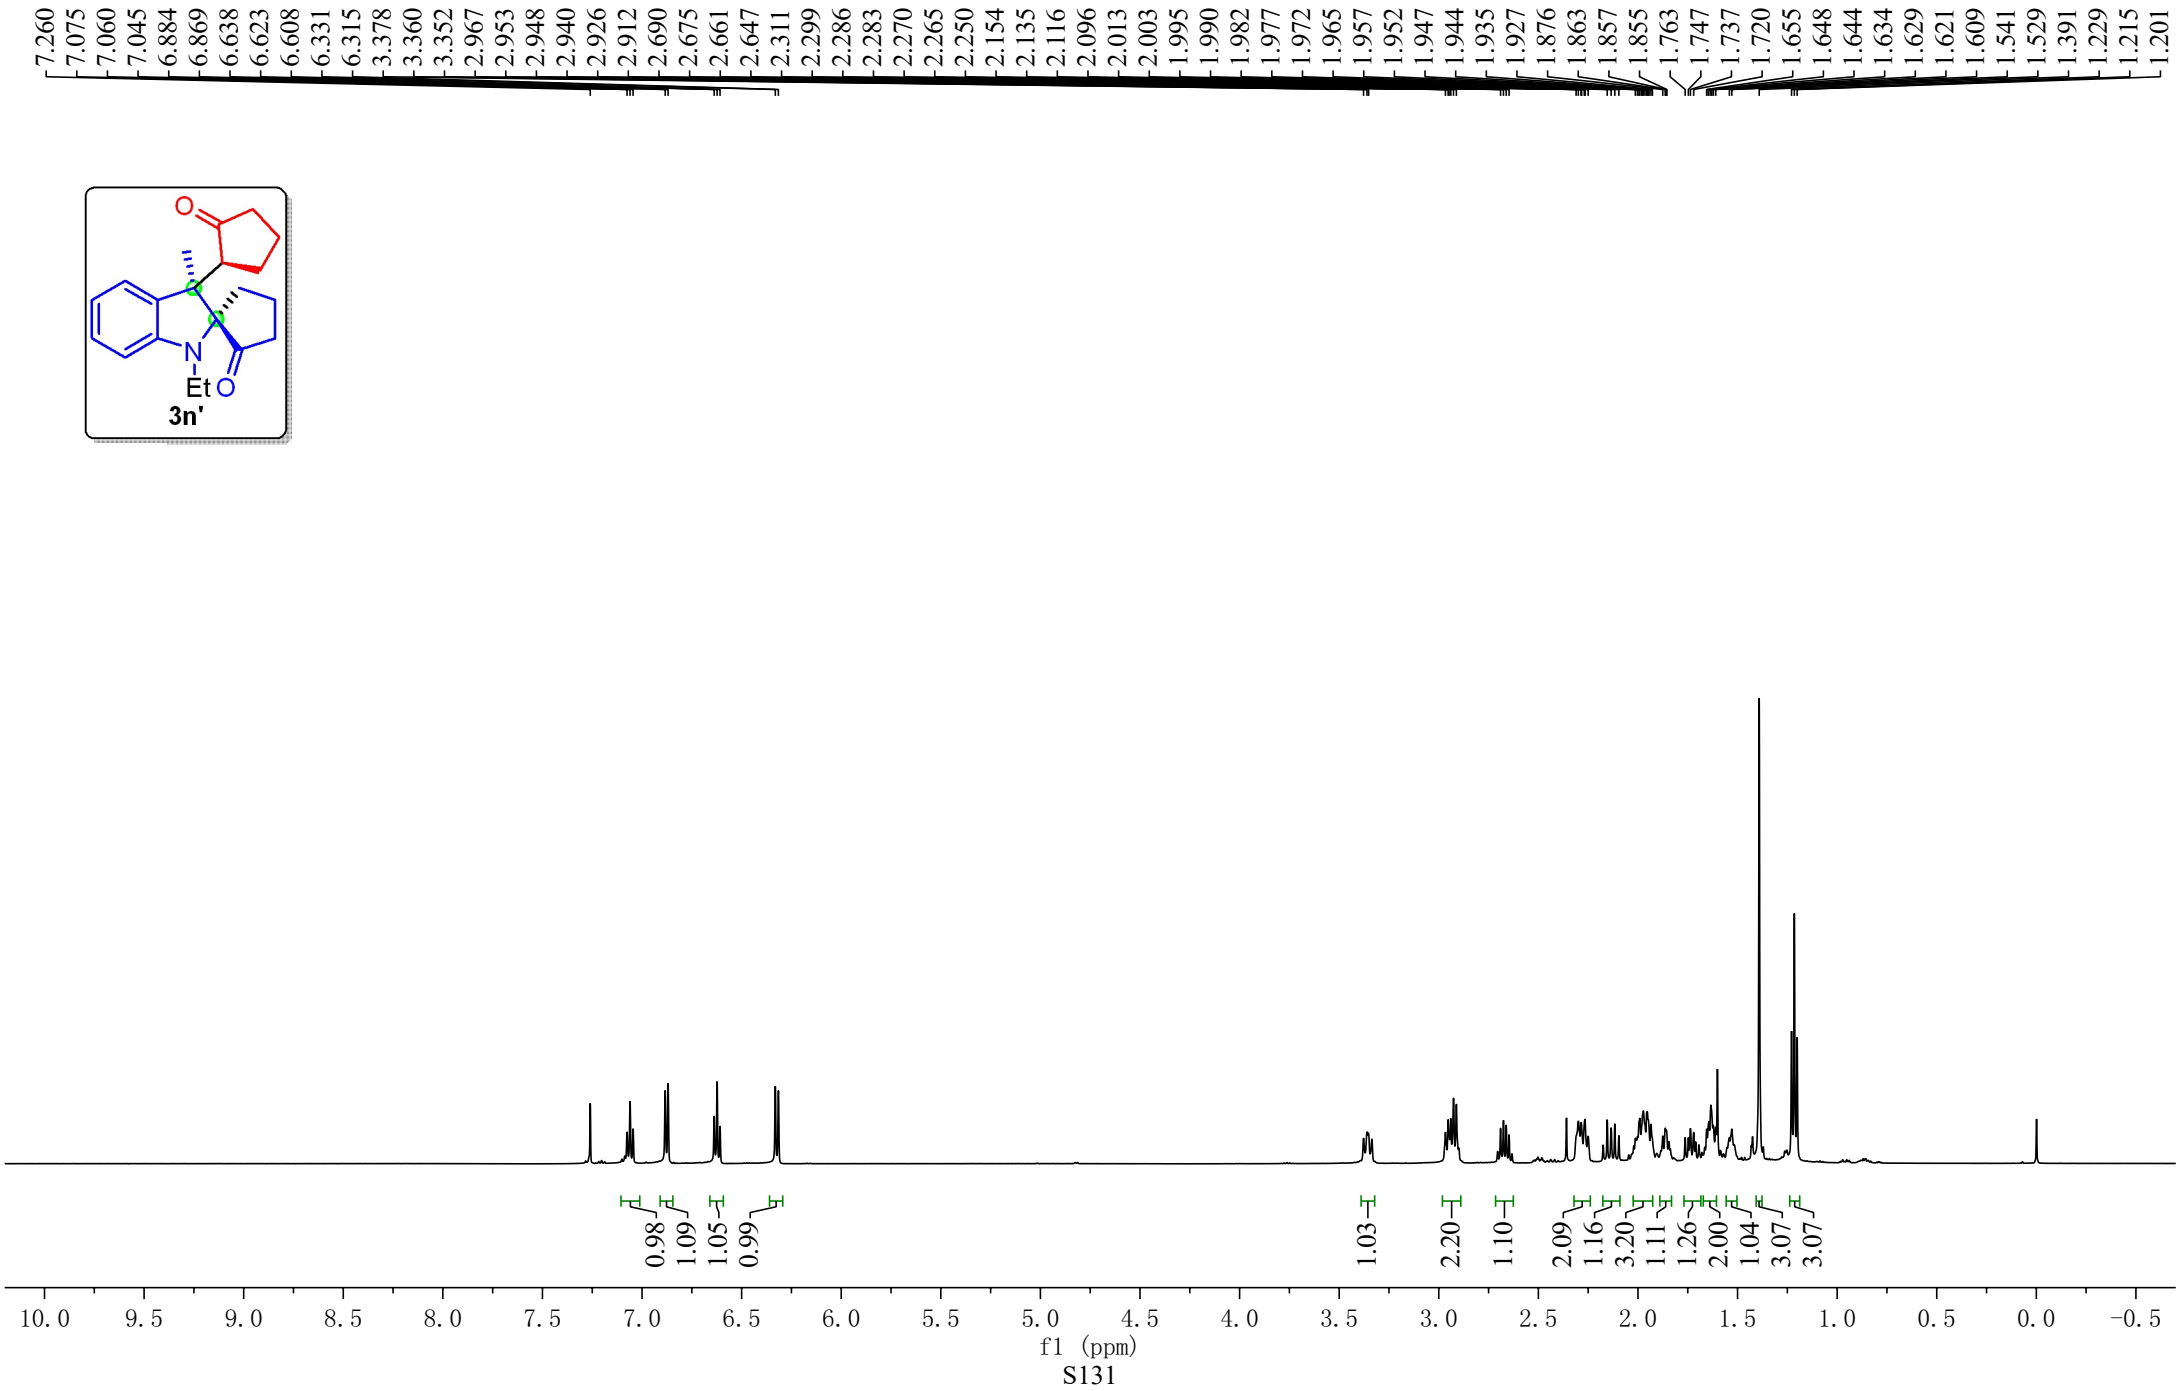

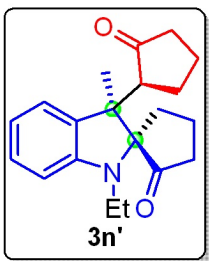

220.06  
218.45

149.42

133.14  
127.91  
123.37  
116.46

104.89

84.74

77.00 Chloroform-d

51.21  
49.90

39.95  
39.48  
37.46

28.00  
27.09

19.47  
17.54

14.02  
13.75

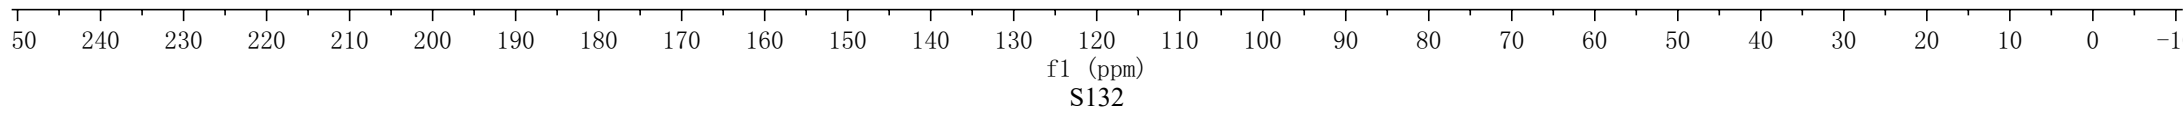



7.260 Chloroform-d

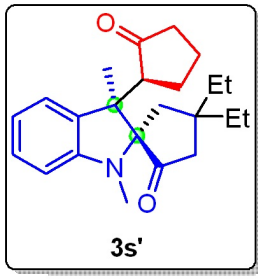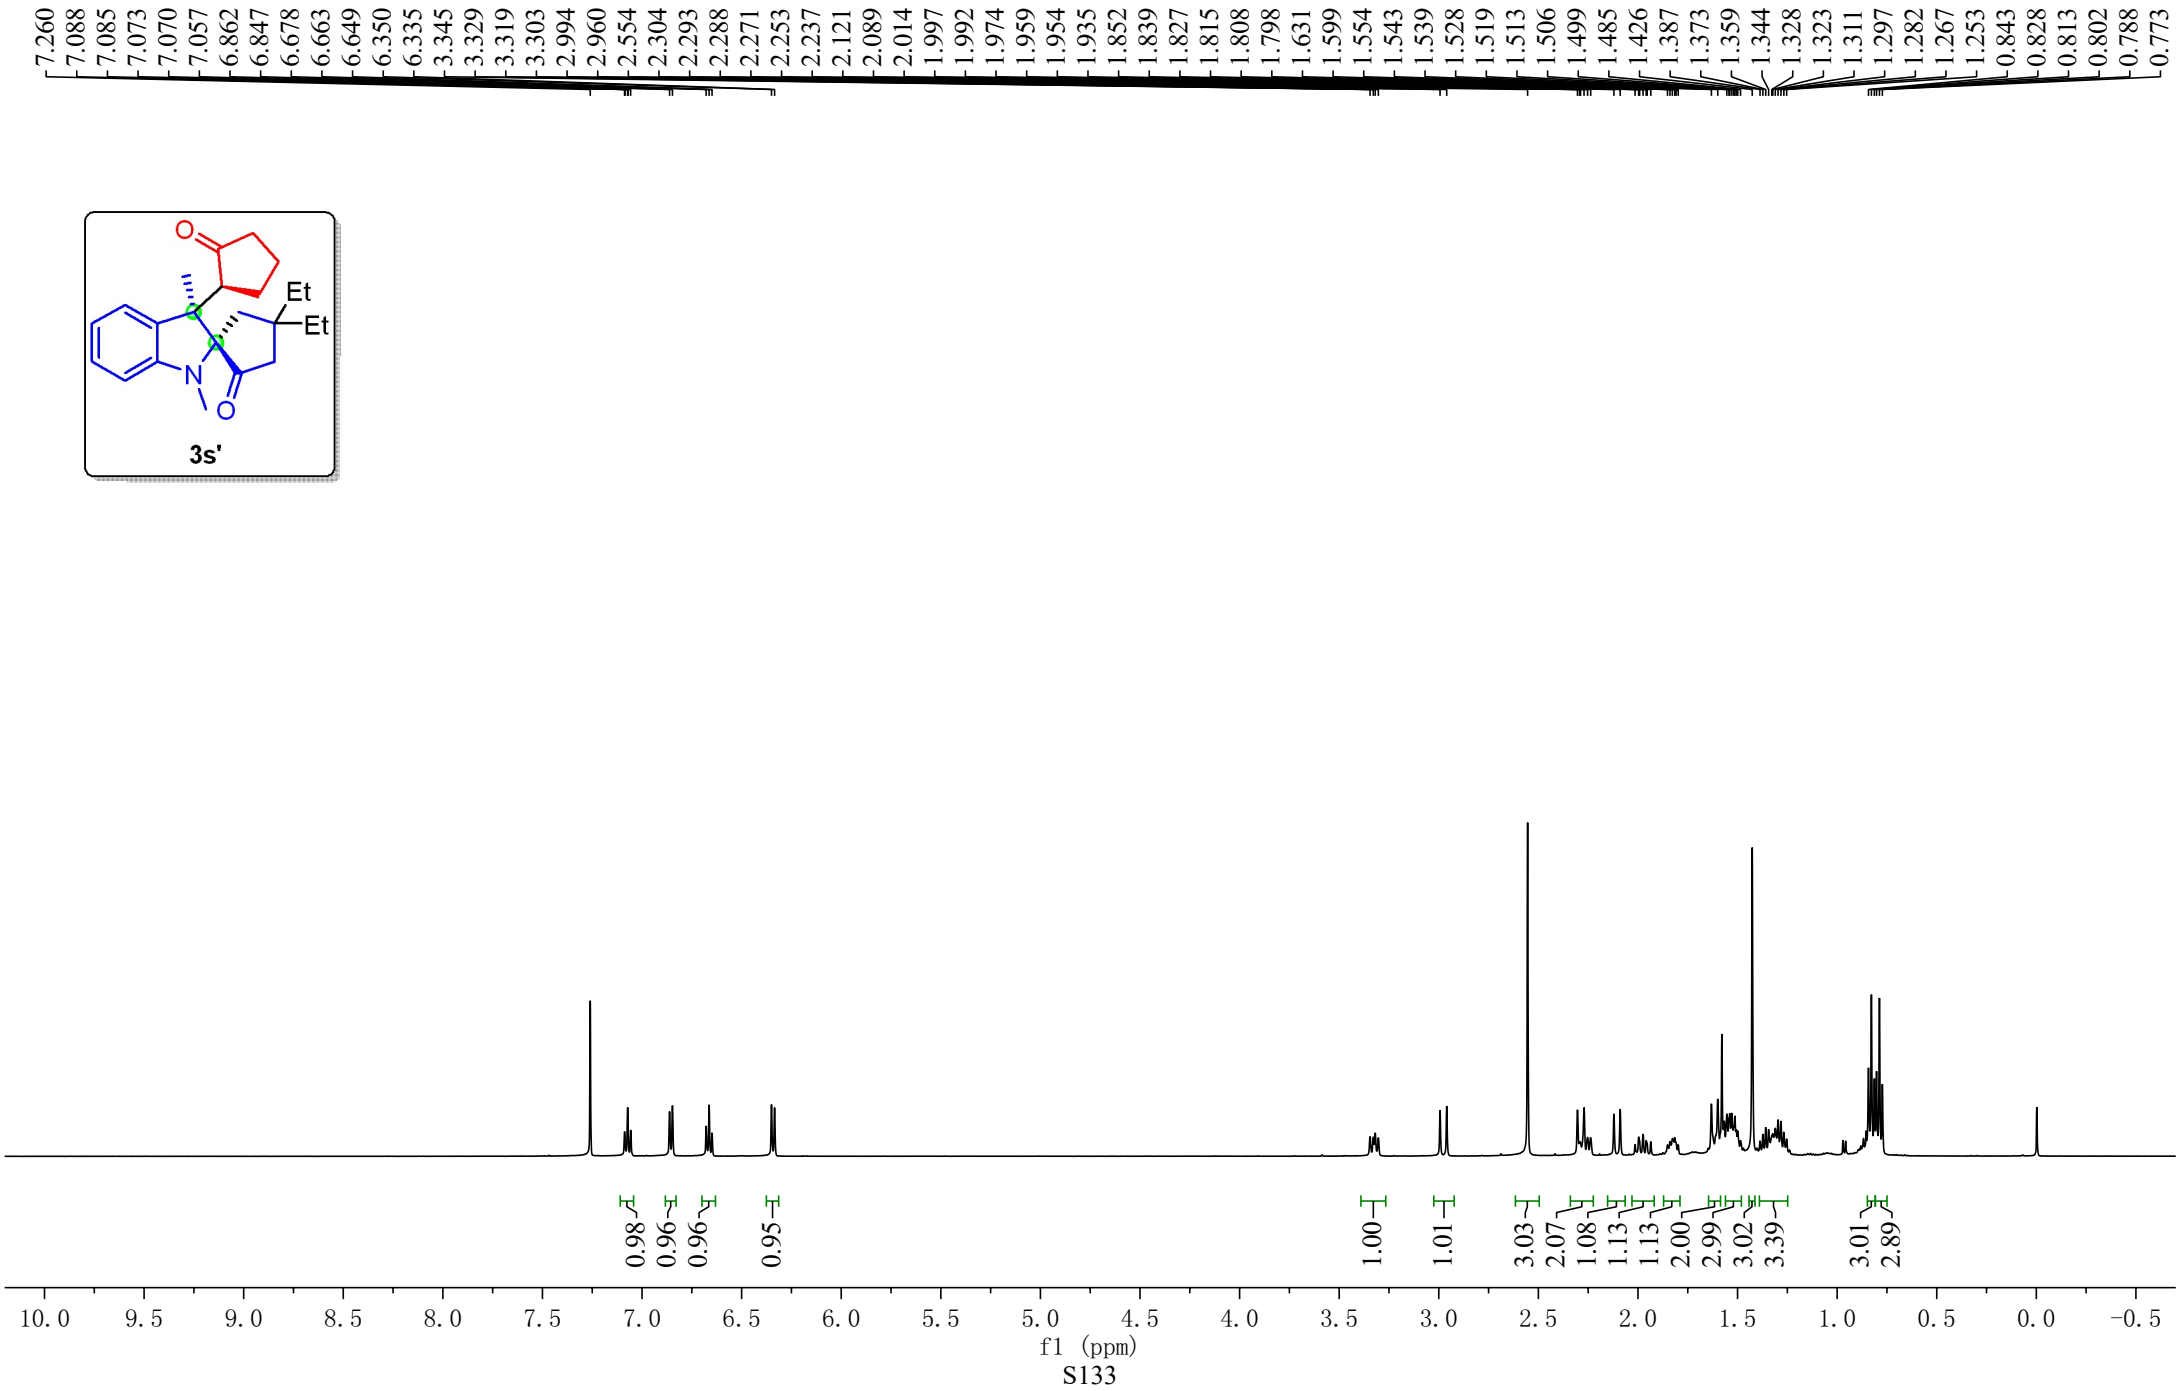

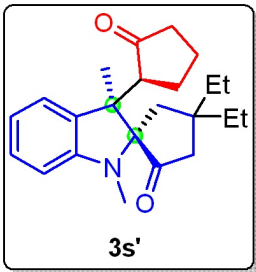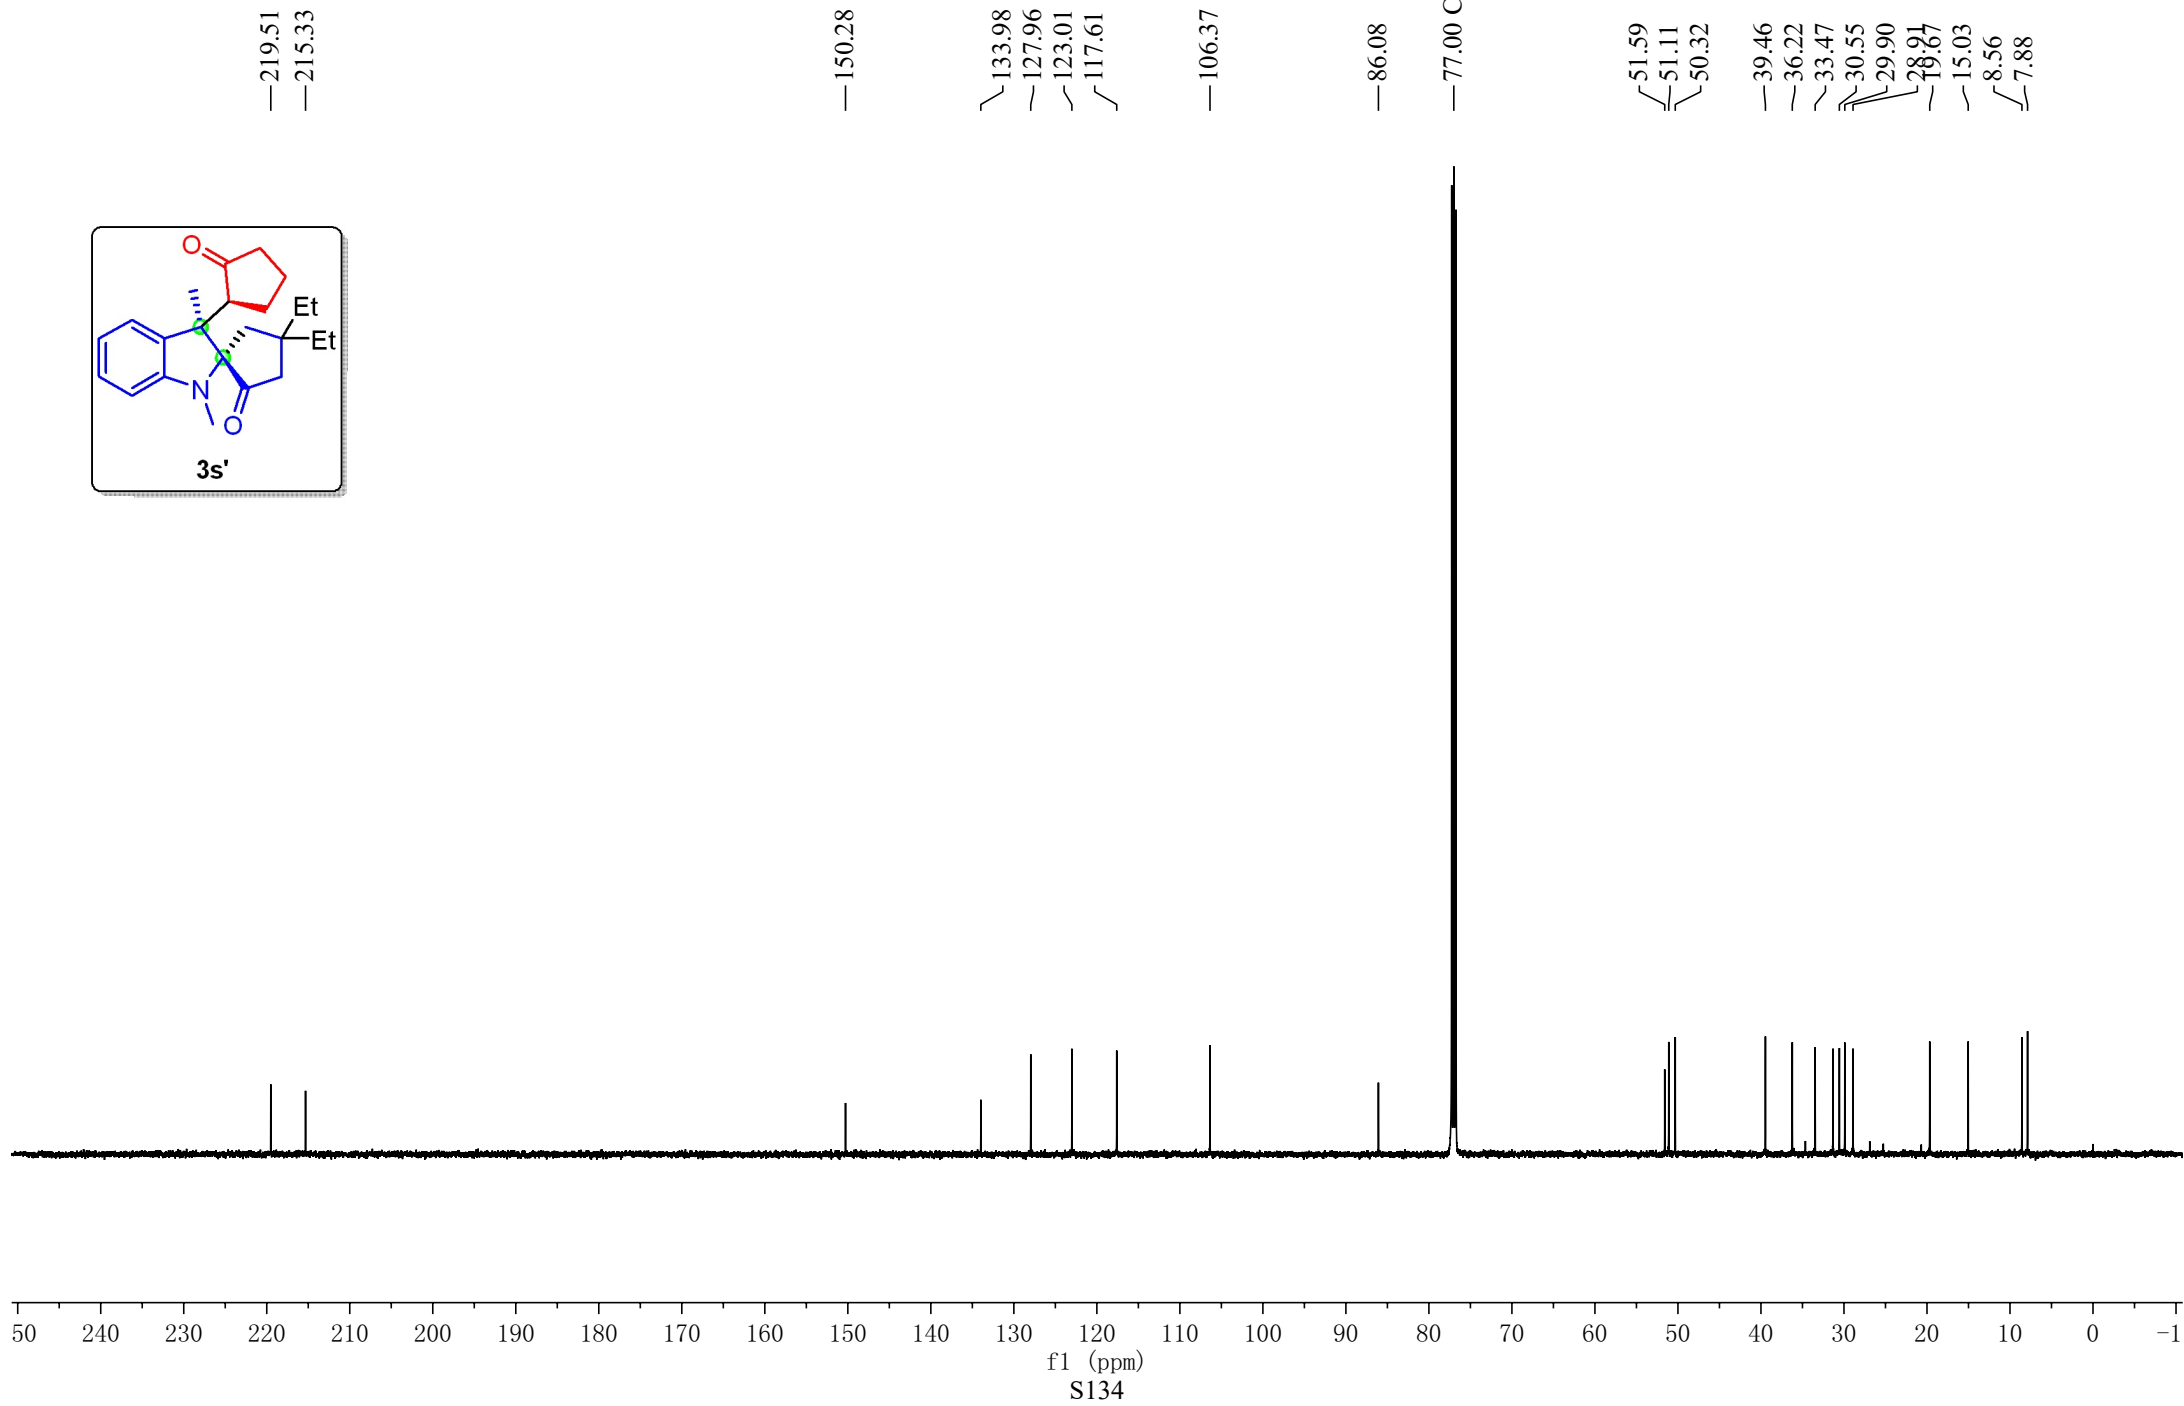

Supplement: d1cc02033a1.pdf [file d1cc02033a1.pdf]
